# Supplementary material
Source: publisher figshare collection journal article supplement (https://acs.figshare.com/ndownloader/files/14570882)
Supplement: Supplementary file 1 [file 14570882]

## Sheet: 1IP Data 
				CAS							1x							S								Graphing Energy Levels (Relative)
		LUMO	HOMO	ROHF	Root 1	Root 2	Root 3	Root 4	Root 5	Root 6	ROHF	Root 1	Root 2	Root 3	Root 4	Root 5	Root 6	ROHF	Root 1	Root 2	Root 3	Root 4	Root 5	Root 6			CAS							1x							S
	4.5	-0.172359	0.949828	-108.777	-108.215	-108.215	-108.215	-108.214	-108.214	-108.213	-108.777	-108.255	-108.254	-108.254	-108.253	-108.253	-108.252	-108.777	-108.346	-108.345	-108.345	-108.345	-108.345	-108.344			ROHF	Root 1	Root 2	Root 3	Root 4	Root 5	Root 6	ROHF	Root 1	Root 2	Root 3	Root 4	Root 5	Root 6	ROHF	Root 1	Root 2	Root 3	Root 4	Root 5	Root 6
	4.45	-0.172162	0.948307	-108.777	-108.216	-108.215	-108.215	-108.214	-108.214	-108.213	-108.777	-108.255	-108.254	-108.254	-108.253	-108.253	-108.252	-108.777	-108.346	-108.345	-108.345	-108.345	-108.345	-108.344		4.5	-0.561343	0	0.000946562	0.000946562	0.00111279	0.00111279	0.00205437	-0.522207	0	0.00105735	0.00105735	0.00123473	0.00123473	0.0022197	-0.430605	0	0.00104913	0.00104913	0.00122598	0.00122598	0.00220847
	4.4	-0.171943	0.946616	-108.777	-108.216	-108.215	-108.215	-108.214	-108.214	-108.213	-108.777	-108.255	-108.254	-108.254	-108.253	-108.253	-108.252	-108.777	-108.347	-108.345	-108.345	-108.345	-108.345	-108.344		4.45	-0.561344	-0.000132155	0.000932884	0.000932884	0.00112531	0.00112531	0.0021841	-0.522208	-0.000160839	0.00102703	0.00102703	0.00123242	0.00123242	0.00234315	-0.430606	-0.000159189	0.00101936	0.00101936	0.00122412	0.00122412	0.00233147
	4.35	-0.171702	0.944743	-108.777	-108.216	-108.215	-108.215	-108.214	-108.214	-108.213	-108.777	-108.255	-108.254	-108.254	-108.253	-108.253	-108.252	-108.777	-108.347	-108.345	-108.345	-108.345	-108.345	-108.344		4.4	-0.561346	-0.000278499	0.000917272	0.000917272	0.0011396	0.0011396	0.00232755	-0.522209	-0.000338227	0.000993553	0.000993553	0.0012309	0.0012309	0.00248045	-0.430608	-0.000334707	0.000986485	0.000986485	0.00122306	0.00122306	0.00246814
	4.3	-0.171438	0.942674	-108.777	-108.216	-108.215	-108.215	-108.214	-108.214	-108.213	-108.777	-108.255	-108.254	-108.254	-108.253	-108.253	-108.252	-108.777	-108.347	-108.345	-108.345	-108.345	-108.345	-108.343		4.35	-0.561347	-0.000440228	0.000899511	0.000899511	0.00115588	0.00115588	0.00248594	-0.522211	-0.000533583	0.000956574	0.000956574	0.00123032	0.00123032	0.00263277	-0.430609	-0.000527963	0.000950147	0.000950147	0.00122295	0.00122295	0.00261962
	4.25	-0.171148	0.940399	-108.777	-108.216	-108.215	-108.215	-108.214	-108.214	-108.213	-108.777	-108.256	-108.254	-108.254	-108.253	-108.253	-108.252	-108.777	-108.347	-108.345	-108.345	-108.345	-108.345	-108.343		4.3	-0.561349	-0.000618628	0.000879356	0.000879356	0.00117443	0.00117443	0.00266052	-0.522213	-0.000748409	0.000915706	0.000915706	0.00123082	0.00123082	0.00280134	-0.430611	-0.000740429	0.000909967	0.000909967	0.00122394	0.00122394	0.00278711
	4.2	-0.17083	0.937906	-108.777	-108.217	-108.215	-108.215	-108.214	-108.214	-108.212	-108.777	-108.256	-108.254	-108.254	-108.253	-108.253	-108.251	-108.777	-108.347	-108.345	-108.345	-108.345	-108.345	-108.343		4.25	-0.56135	-0.000815066	0.000856545	0.000856545	0.00119555	0.00119555	0.00285267	-0.522214	-0.000984306	0.000870536	0.000870536	0.00123258	0.00123258	0.00298751	-0.430613	-0.000973678	0.000865533	0.000865533	0.00122621	0.00122621	0.00297189
	4.15	-0.170483	0.935187	-108.777	-108.217	-108.215	-108.215	-108.214	-108.214	-108.212	-108.777	-108.256	-108.254	-108.254	-108.253	-108.253	-108.251	-108.777	-108.348	-108.345	-108.345	-108.345	-108.345	-108.343		4.2	-0.561352	-0.001031	0.000830798	0.000830798	0.00121956	0.00121956	0.00306389	-0.522216	-0.00124298	0.000820614	0.000820615	0.00123582	0.00123582	0.0031927	-0.430615	-0.00122939	0.000816394	0.000816394	0.00122994	0.00122994	0.00317534
	4.1	-0.170104	0.932233	-108.777	-108.217	-108.215	-108.215	-108.214	-108.214	-108.212	-108.777	-108.256	-108.254	-108.254	-108.253	-108.253	-108.251	-108.777	-108.348	-108.346	-108.346	-108.345	-108.345	-108.343		4.15	-0.561354	-0.00126797	0.000801816	0.000801816	0.00124686	0.00124686	0.00329581	-0.522218	-0.00152627	0.000765461	0.000765461	0.00124078	0.00124078	0.00341844	-0.430617	-0.00150936	0.000762066	0.000762066	0.00123539	0.00123539	0.00339893
	4.05	-0.169691	0.929041	-108.777	-108.217	-108.215	-108.215	-108.214	-108.214	-108.212	-108.777	-108.257	-108.254	-108.254	-108.253	-108.253	-108.251	-108.777	-108.348	-108.346	-108.346	-108.345	-108.345	-108.342		4.1	-0.561356	-0.00152764	0.000769281	0.000769281	0.00127789	0.00127789	0.00355022	-0.52222	-0.00183612	0.000704563	0.000704563	0.00124774	0.00124774	0.00366641	-0.430618	-0.00181551	0.000702026	0.000702026	0.0012428	0.0012428	0.00364425
	4	-0.169243	0.925608	-108.777	-108.218	-108.215	-108.215	-108.214	-108.214	-108.211	-108.777	-108.257	-108.254	-108.254	-108.253	-108.253	-108.25	-108.777	-108.349	-108.346	-108.346	-108.345	-108.345	-108.342		4.05	-0.561358	-0.00181176	0.000732859	0.000732859	0.00131316	0.00131316	0.00382911	-0.522222	-0.00217461	0.000637376	0.000637376	0.00125704	0.00125704	0.00393843	-0.43062	-0.00214991	0.000635717	0.000635717	0.0012525	0.0012525	0.00391302
	3.95	-0.168755	0.921936	-108.777	-108.218	-108.215	-108.215	-108.214	-108.214	-108.211	-108.777	-108.258	-108.254	-108.254	-108.253	-108.253	-108.25	-108.777	-108.349	-108.346	-108.346	-108.345	-108.345	-108.342		4	-0.561359	-0.00212221	0.0006922	0.0006922	0.00135324	0.00135324	0.00413468	-0.522223	-0.002544	0.000563325	0.000563325	0.00126908	0.00126908	0.00423648	-0.430621	-0.00251475	0.000562543	0.000562543	0.00126484	0.00126484	0.00420713
	3.9	-0.168226	0.918032	-108.777	-108.218	-108.215	-108.215	-108.214	-108.214	-108.211	-108.777	-108.258	-108.254	-108.254	-108.253	-108.253	-108.25	-108.777	-108.35	-108.346	-108.346	-108.345	-108.345	-108.341		3.95	-0.56136	-0.00246098	0.000646937	0.000646937	0.0013988	0.0013988	0.00446937	-0.522224	-0.00294665	0.00048181	0.00048181	0.00128434	0.00128434	0.00456275	-0.430622	-0.00291241	0.000481878	0.000481878	0.00128027	0.00128027	0.00452864
	3.85	-0.167653	0.913907	-108.777	-108.219	-108.215	-108.215	-108.214	-108.214	-108.21	-108.777	-108.258	-108.254	-108.254	-108.253	-108.253	-108.249	-108.777	-108.35	-108.346	-108.346	-108.345	-108.345	-108.341		3.9	-0.561359	-0.00283019	0.000596693	0.000596693	0.00145061	0.00145061	0.0048359	-0.522223	-0.00338514	0.000392208	0.000392208	0.00130336	0.00130336	0.00491962	-0.430622	-0.00334543	0.000393058	0.000393058	0.00129927	0.00129927	0.00487979
	3.8	-0.167032	0.909579	-108.777	-108.219	-108.215	-108.215	-108.214	-108.214	-108.21	-108.777	-108.259	-108.254	-108.254	-108.253	-108.253	-108.249	-108.777	-108.351	-108.346	-108.346	-108.345	-108.345	-108.341		3.85	-0.561358	-0.0032321	0.000541078	0.000541078	0.00150954	0.00150954	0.00523731	-0.522222	-0.00386219	0.000293878	0.000293878	0.00132683	0.00132683	0.00530975	-0.43062	-0.00381652	0.000295392	0.000295392	0.00132246	0.00132246	0.00526308
	3.75	-0.166361	0.905072	-108.777	-108.22	-108.215	-108.215	-108.214	-108.214	-108.209	-108.777	-108.26	-108.255	-108.255	-108.253	-108.253	-108.248	-108.777	-108.351	-108.346	-108.346	-108.345	-108.345	-108.34		3.8	-0.561354	-0.00366906	0.000479697	0.000479697	0.00157661	0.00157661	0.005677	-0.522218	-0.00438072	0.000186167	0.000186167	0.00135554	0.00135554	0.00573605	-0.430616	-0.0043286	0.000188164	0.000188164	0.00135053	0.00135053	0.00568125
	3.7	-0.165634	0.900417	-108.777	-108.22	-108.215	-108.215	-108.214	-108.214	-108.209	-108.777	-108.26	-108.255	-108.255	-108.253	-108.253	-108.248	-108.777	-108.352	-108.346	-108.346	-108.345	-108.345	-108.34		3.75	-0.561347	-0.00414361	0.000412153	0.000412153	0.00165297	0.00165297	0.00615875	-0.522211	-0.00494383	6.84176e-05	6.84176e-05	0.00139042	0.00139042	0.00620175	-0.43061	-0.00488478	7.06349e-05	7.06349e-05	0.00138433	0.00138433	0.00613732
	3.65	-0.164848	0.895652	-108.777	-108.221	-108.215	-108.215	-108.214	-108.214	-108.208	-108.777	-108.261	-108.255	-108.255	-108.253	-108.253	-108.247	-108.777	-108.352	-108.346	-108.346	-108.345	-108.345	-108.339		3.7	-0.561338	-0.00465836	0.00033805	0.00033805	0.00173997	0.00173997	0.00668681	-0.522202	-0.00555483	-6.00227e-05	-6.00227e-05	0.00143259	0.00143259	0.00671042	-0.4306	-0.00548837	-5.79451e-05	-5.79451e-05	0.00142484	0.00142484	0.00663464
	3.6	-0.163999	0.890823	-108.777	-108.221	-108.215	-108.215	-108.214	-108.214	-108.208	-108.777	-108.262	-108.255	-108.255	-108.253	-108.253	-108.247	-108.777	-108.353	-108.347	-108.347	-108.345	-108.345	-108.338		3.65	-0.561323	-0.00521608	0.000257007	0.000257007	0.00183917	0.00183917	0.00726589	-0.522187	-0.00621719	-0.000199791	-0.000199791	0.00148338	0.00148338	0.00726599	-0.430586	-0.00614289	-0.000198331	-0.000198331	0.00147323	0.00147323	0.00717688
	3.55	-0.163081	0.885985	-108.777	-108.222	-108.215	-108.215	-108.213	-108.213	-108.207	-108.777	-108.262	-108.255	-108.255	-108.253	-108.253	-108.246	-108.777	-108.354	-108.347	-108.347	-108.345	-108.345	-108.338		3.6	-0.561304	-0.00581924	0.000168785	0.000168785	0.00195247	0.00195247	0.00790144	-0.522168	-0.00693461	-0.000351457	-0.000351457	0.00154435	0.00154435	0.00787286	-0.430566	-0.00685207	-0.000351232	-0.000351232	0.0015309	0.0015309	0.00776819
	3.5	-0.162089	0.881198	-108.777	-108.223	-108.216	-108.216	-108.213	-108.213	-108.206	-108.777	-108.263	-108.255	-108.255	-108.253	-108.253	-108.245	-108.777	-108.355	-108.347	-108.347	-108.345	-108.345	-108.337		3.55	-0.561277	-0.00647144	7.28837e-05	7.28837e-05	0.00208177	0.00208177	0.00859889	-0.522141	-0.00771092	-0.000515644	-0.000515644	0.00161734	0.00161734	0.00853565	-0.430539	-0.00761981	-0.000517433	-0.000517433	0.00159948	0.00159948	0.00841289
	3.45	-0.161017	0.876533	-108.777	-108.223	-108.216	-108.216	-108.213	-108.213	-108.205	-108.777	-108.264	-108.256	-108.256	-108.253	-108.253	-108.245	-108.777	-108.356	-108.347	-108.347	-108.344	-108.344	-108.336		3.5	-0.561242	-0.00717541	-3.0891e-05	-3.0891e-05	0.00222956	0.00222956	0.00936476	-0.522106	-0.00855014	-0.000692825	-0.000692825	0.00170451	0.00170451	0.00925962	-0.430504	-0.0084502	-0.000697582	-0.000697582	0.00168092	0.00168092	0.00911595
	3.4	-0.159859	0.872064	-108.777	-108.224	-108.216	-108.216	-108.213	-108.213	-108.204	-108.777	-108.265	-108.256	-108.256	-108.253	-108.253	-108.244	-108.777	-108.357	-108.347	-108.347	-108.344	-108.344	-108.336		3.45	-0.561196	-0.0079342	-0.000142703	-0.000142703	0.00239863	0.00239863	0.0102061	-0.52206	-0.00945643	-0.000883399	-0.000883399	0.0018084	0.0018084	0.0100504	-0.430459	-0.00934749	-0.000892284	-0.000892284	0.00177751	0.00177751	0.00988271
	3.35	-0.158608	0.867875	-108.777	-108.225	-108.216	-108.216	-108.213	-108.213	-108.203	-108.777	-108.266	-108.256	-108.256	-108.253	-108.253	-108.243	-108.777	-108.358	-108.348	-108.348	-108.344	-108.344	-108.335		3.4	-0.561138	-0.00875085	-0.000262601	-0.000262601	0.00259226	0.00259226	0.0111306	-0.522002	-0.0104341	-0.00108765	-0.00108765	0.00193202	0.00193202	0.0109142	-0.430401	-0.010316	-0.00110204	-0.00110204	0.00189197	0.00189197	0.010719
	3.3	-0.157256	0.864052	-108.776	-108.226	-108.216	-108.216	-108.212	-108.212	-108.202	-108.776	-108.267	-108.256	-108.256	-108.252	-108.252	-108.242	-108.776	-108.359	-108.348	-108.348	-108.344	-108.344	-108.334		3.35	-0.561065	-0.00962836	-0.000390464	-0.000390464	0.00281427	0.00281427	0.0121465	-0.521929	-0.0114874	-0.0013057	-0.0013057	0.00207885	0.00207885	0.0118576	-0.430327	-0.0113603	-0.00132721	-0.00132721	0.00202751	0.00202751	0.0116311
	3.25	-0.155796	0.860689	-108.776	-108.227	-108.216	-108.216	-108.212	-108.212	-108.201	-108.776	-108.268	-108.256	-108.256	-108.252	-108.252	-108.241	-108.776	-108.36	-108.348	-108.348	-108.344	-108.344	-108.333		3.3	-0.560974	-0.0105696	-0.00052595	-0.00052595	0.00306909	0.00306909	0.0132632	-0.521838	-0.0126207	-0.00153746	-0.00153746	0.00225299	0.00225299	0.0128879	-0.430236	-0.0124847	-0.00156797	-0.00156797	0.00218791	0.00218791	0.0126259
	3.2	-0.154219	0.857879	-108.776	-108.228	-108.216	-108.216	-108.212	-108.212	-108.2	-108.776	-108.27	-108.257	-108.257	-108.252	-108.252	-108.239	-108.776	-108.361	-108.348	-108.348	-108.344	-108.344	-108.331		3.25	-0.560861	-0.0115774	-0.000668422	-0.000668422	0.00336195	0.00336195	0.0144904	-0.521725	-0.0138384	-0.00178259	-0.00178259	0.00245922	0.00245922	0.0140125	-0.430123	-0.0136938	-0.00182421	-0.00182421	0.00237764	0.00237764	0.0137108
	3.15	-0.152516	0.855721	-108.776	-108.229	-108.216	-108.216	-108.211	-108.211	-108.198	-108.776	-108.271	-108.257	-108.257	-108.252	-108.252	-108.238	-108.776	-108.363	-108.349	-108.349	-108.343	-108.343	-108.33		3.2	-0.560722	-0.0126542	-0.000816862	-0.000816862	0.00369895	0.00369895	0.0158388	-0.521586	-0.0151448	-0.00204042	-0.00204042	0.00270312	0.00270312	0.0152398	-0.429984	-0.0149918	-0.00209553	-0.00209553	0.00260195	0.00260195	0.0148937
	3.1	-0.150678	0.854308	-108.776	-108.231	-108.217	-108.217	-108.211	-108.211	-108.197	-108.776	-108.273	-108.257	-108.257	-108.251	-108.251	-108.237	-108.776	-108.364	-108.349	-108.349	-108.343	-108.343	-108.329		3.15	-0.560553	-0.0138021	-0.000969769	-0.000969769	0.00408724	0.00408724	0.01732	-0.521417	-0.0165439	-0.00230986	-0.00230986	0.00299121	0.00299121	0.0165785	-0.429815	-0.016383	-0.00238108	-0.00238108	0.00286704	0.00286704	0.0161831
	3.05	-0.148694	0.853744	-108.776	-108.232	-108.217	-108.217	-108.21	-108.21	-108.195	-108.776	-108.274	-108.258	-108.258	-108.251	-108.251	-108.235	-108.776	-108.366	-108.349	-108.349	-108.343	-108.343	-108.327		3.1	-0.560347	-0.0150225	-0.00112487	-0.00112487	0.00453538	0.00453538	0.018947	-0.521211	-0.0180396	-0.0025893	-0.0025893	0.00333108	0.00333108	0.0180377	-0.429609	-0.0178713	-0.00267944	-0.00267944	0.00318026	0.00318026	0.0175883
	3	-0.146551	0.854121	-108.775	-108.233	-108.217	-108.217	-108.21	-108.21	-108.193	-108.775	-108.276	-108.258	-108.258	-108.25	-108.25	-108.233	-108.775	-108.367	-108.35	-108.35	-108.342	-108.342	-108.325		3.05	-0.560099	-0.0163178	-0.00127955	-0.00127955	0.00505291	0.00505291	0.0207327	-0.520963	-0.0196356	-0.00287657	-0.00287657	0.00373149	0.00373149	0.0196275	-0.429361	-0.0194605	-0.00298872	-0.00298872	0.00355001	0.00355001	0.0191189
	2.95	-0.144239	0.855531	-108.775	-108.235	-108.217	-108.217	-108.209	-108.209	-108.191	-108.775	-108.278	-108.258	-108.258	-108.25	-108.25	-108.231	-108.775	-108.369	-108.35	-108.35	-108.342	-108.342	-108.324		3	-0.5598	-0.0176882	-0.00142993	-0.00142993	0.00565141	0.00565141	0.0226921	-0.520664	-0.0213352	-0.00316867	-0.00316867	0.00420272	0.00420272	0.0213582	-0.429062	-0.0211539	-0.00330604	-0.00330604	0.00398637	0.00398637	0.0207856
	2.9	-0.141744	0.858061	-108.775	-108.236	-108.217	-108.217	-108.208	-108.208	-108.188	-108.775	-108.28	-108.258	-108.258	-108.249	-108.249	-108.229	-108.775	-108.371	-108.35	-108.35	-108.341	-108.341	-108.322		2.95	-0.559442	-0.0191342	-0.00157103	-0.00157103	0.0063444	0.0063444	0.0248415	-0.520306	-0.0231413	-0.00346169	-0.00346169	0.00475669	0.00475669	0.023241	-0.428704	-0.0229542	-0.00362759	-0.00362759	0.00450107	0.00450107	0.0225997
	2.85	-0.139054	0.861786	-108.774	-108.238	-108.217	-108.217	-108.207	-108.207	-108.186	-108.774	-108.282	-108.259	-108.259	-108.248	-108.248	-108.227	-108.774	-108.373	-108.35	-108.35	-108.34	-108.34	-108.32		2.9	-0.559013	-0.020655	-0.00169651	-0.00169651	0.00714763	0.00714763	0.0271986	-0.519877	-0.0250562	-0.00375055	-0.00375055	0.00540726	0.00540726	0.0252878	-0.428275	-0.0248637	-0.00394836	-0.00394836	0.00510785	0.00510785	0.0245738
	2.8	-0.136149	0.866795	-108.773	-108.239	-108.217	-108.217	-108.206	-108.206	-108.183	-108.773	-108.284	-108.259	-108.259	-108.248	-108.248	-108.225	-108.773	-108.375	-108.351	-108.351	-108.34	-108.34	-108.317		2.85	-0.558501	-0.0222477	-0.0017975	-0.0017975	0.00808054	0.00808054	0.0297843	-0.519365	-0.0270817	-0.00402858	-0.00402858	0.00617076	0.00617076	0.0275114	-0.427764	-0.0268838	-0.00426166	-0.00426166	0.00582299	0.00582299	0.0267213
	2.75	-0.133013	0.873146	-108.773	-108.241	-108.217	-108.217	-108.205	-108.205	-108.18	-108.773	-108.286	-108.259	-108.259	-108.247	-108.247	-108.222	-108.773	-108.377	-108.351	-108.351	-108.339	-108.339	-108.315		2.8	-0.557891	-0.0239134	-0.00186556	-0.00186556	0.00916285	0.00916285	0.0326186	-0.518755	-0.0292194	-0.00428805	-0.00428805	0.00706549	0.00706549	0.0299251	-0.427153	-0.029016	-0.00455958	-0.00455958	0.00666489	0.00666489	0.0290567
	2.7	-0.129626	0.880897	-108.772	-108.243	-108.217	-108.217	-108.204	-108.204	-108.176	-108.772	-108.288	-108.259	-108.259	-108.245	-108.245	-108.219	-108.772	-108.38	-108.351	-108.351	-108.337	-108.337	-108.312		2.75	-0.557165	-0.0256475	-0.00188735	-0.00188735	0.0104207	0.0104207	0.0357273	-0.518029	-0.03147	-0.00451854	-0.00451854	0.00811346	0.00811346	0.0325438	-0.426427	-0.0312604	-0.00483153	-0.00483153	0.00765572	0.00765572	0.0315965
	2.65	-0.125966	0.89009	-108.771	-108.245	-108.217	-108.217	-108.202	-108.202	-108.173	-108.771	-108.291	-108.259	-108.259	-108.244	-108.244	-108.216	-108.771	-108.382	-108.351	-108.351	-108.336	-108.336	-108.309		2.7	-0.556301	-0.0274458	-0.00184741	-0.00184741	0.0118838	0.0118838	0.0391386	-0.517165	-0.0338333	-0.00470736	-0.00470736	0.00934006	0.00934006	0.0353832	-0.425563	-0.0336163	-0.00506448	-0.00506448	0.00882118	0.00882118	0.0343587
	2.6	-0.122007	0.900751	-108.77	-108.247	-108.217	-108.217	-108.2	-108.2	-108.168	-108.77	-108.294	-108.26	-108.26	-108.242	-108.242	-108.213	-108.77	-108.385	-108.352	-108.352	-108.334	-108.334	-108.306		2.65	-0.555274	-0.0293027	-0.00172672	-0.00172672	0.0135865	0.0135865	0.0428846	-0.516138	-0.0363084	-0.00483883	-0.00483883	0.0107749	0.0107749	0.0384605	-0.424536	-0.0360821	-0.00524227	-0.00524227	0.0101913	0.0101913	0.0373633
	2.55	-0.117717	0.912885	-108.768	-108.249	-108.217	-108.217	-108.198	-108.198	-108.164	-108.768	-108.296	-108.259	-108.259	-108.24	-108.24	-108.209	-108.768	-108.388	-108.352	-108.352	-108.333	-108.333	-108.302		2.6	-0.554055	-0.0312116	-0.00150212	-0.00150212	0.0155693	0.0155693	0.0470022	-0.514919	-0.0388936	-0.00489367	-0.00489367	0.0124523	0.0124523	0.0417939	-0.423317	-0.0386552	-0.00534504	-0.00534504	0.0118011	0.0118011	0.0406326
	2.5	-0.113069	0.915907	-108.766	-108.251	-108.216	-108.216	-108.195	-108.195	-108.159	-108.766	-108.299	-108.259	-108.259	-108.238	-108.238	-108.205	-108.766	-108.39	-108.351	-108.351	-108.33	-108.33	-108.298		2.55	-0.552607	-0.0331633	-0.00114477	-0.00114477	0.0178802	0.0178802	0.0515345	-0.513471	-0.0415857	-0.00484814	-0.00484814	0.0144127	0.0144127	0.0454028	-0.421869	-0.0413316	-0.00534848	-0.00534848	0.0136917	0.0136917	0.0441912
	2.45	-0.108021	0.915022	-108.764	-108.253	-108.215	-108.215	-108.192	-108.192	-108.153	-108.764	-108.302	-108.259	-108.259	-108.235	-108.235	-108.201	-108.764	-108.393	-108.351	-108.351	-108.328	-108.328	-108.294		2.5	-0.550889	-0.0351487	-0.000622157	-0.000622157	0.0205728	0.0205728	0.0565292	-0.511753	-0.0443808	-0.00467416	-0.00467416	0.0167021	0.0167021	0.0493064	-0.420151	-0.0441057	-0.00522318	-0.00522318	0.0159105	0.0159105	0.0480663
	2.4	-0.10253	0.914421	-108.762	-108.255	-108.214	-108.214	-108.188	-108.188	-108.147	-108.762	-108.305	-108.258	-108.258	-108.232	-108.232	-108.197	-108.762	-108.396	-108.351	-108.351	-108.325	-108.325	-108.289		2.45	-0.548851	-0.0371547	0.000106868	0.000106868	0.0237119	0.0237119	0.0620431	-0.509715	-0.0472726	-0.00433716	-0.00433716	0.0193747	0.0193747	0.0535246	-0.418113	-0.0469703	-0.00493361	-0.00493361	0.0185131	0.0185131	0.052287
	2.35	-0.0965457	0.91414	-108.759	-108.257	-108.213	-108.213	-108.184	-108.184	-108.141	-108.759	-108.308	-108.258	-108.258	-108.228	-108.228	-108.192	-108.759	-108.399	-108.35	-108.35	-108.321	-108.321	-108.284		2.4	-0.546436	-0.0391661	0.00109052	0.00109052	0.0273718	0.0273718	0.0681406	-0.5073	-0.0502532	-0.00379599	-0.00379599	0.0224929	0.0224929	0.0580752	-0.415698	-0.049916	-0.00443728	-0.00443728	0.0215635	0.0215635	0.0568846
	2.3	-0.0900124	0.914213	-108.756	-108.259	-108.211	-108.211	-108.179	-108.179	-108.133	-108.756	-108.311	-108.257	-108.257	-108.224	-108.224	-108.186	-108.756	-108.402	-108.349	-108.349	-108.317	-108.317	-108.279		2.35	-0.543576	-0.0411646	0.00238582	0.00238582	0.0316386	0.0316386	0.0748956	-0.50444	-0.0533117	-0.00300166	-0.00300166	0.0261286	0.0261286	0.0629725	-0.412838	-0.0529304	-0.00368358	-0.00368358	0.025136	0.025136	0.0618907
	2.25	-0.0828652	0.914673	-108.752	-108.261	-108.209	-108.209	-108.173	-108.173	-108.125	-108.752	-108.314	-108.255	-108.255	-108.219	-108.219	-108.181	-108.752	-108.405	-108.347	-108.347	-108.312	-108.312	-108.273		2.3	-0.540191	-0.0431282	0.00405992	0.00405992	0.0366121	0.0366121	0.0823922	-0.501055	-0.0564344	-0.00189611	-0.00189611	0.0303644	0.0303644	0.0682238	-0.409454	-0.0559984	-0.00261257	-0.00261257	0.0293162	0.0293162	0.0673366
	2.2	-0.0750313	0.915549	-108.747	-108.262	-108.207	-108.207	-108.166	-108.166	-108.115	-108.747	-108.317	-108.253	-108.253	-108.214	-108.214	-108.175	-108.747	-108.408	-108.345	-108.345	-108.306	-108.306	-108.267		2.25	-0.536191	-0.0450305	0.00619157	0.00619157	0.042407	0.042407	0.090726	-0.497055	-0.0596033	-0.000410784	-0.000410784	0.0352952	0.0352952	0.073826	-0.405453	-0.0591004	-0.00115341	-0.00115341	0.0342025	0.0342025	0.0732501
	2.15	-0.0664282	0.916864	-108.741	-108.264	-108.203	-108.203	-108.158	-108.158	-108.105	-108.741	-108.321	-108.251	-108.251	-108.207	-108.207	-108.169	-108.741	-108.412	-108.343	-108.343	-108.3	-108.3	-108.26		2.2	-0.531469	-0.04684	0.00887298	0.00887298	0.049156	0.049156	0.100005	-0.492333	-0.0627957	0.00153518	0.00153518	0.0410293	0.0410293	0.0797597	-0.400731	-0.0622122	0.000777437	0.000777437	0.0399082	0.0399082	0.0796526
	2.1	-0.0569629	0.918636	-108.735	-108.266	-108.199	-108.199	-108.149	-108.149	-108.094	-108.735	-108.324	-108.247	-108.247	-108.199	-108.199	-108.162	-108.735	-108.415	-108.34	-108.34	-108.292	-108.292	-108.252		2.15	-0.525901	-0.0485194	0.0122121	0.0122121	0.0570119	0.0570119	0.110353	-0.486765	-0.0659824	0.00403724	0.00403724	0.047691	0.047691	0.0859836	-0.395163	-0.0653034	0.00327863	0.00327863	0.0465639	0.0465639	0.0865542
	2.05	-0.0465304	0.920871	-108.727	-108.267	-108.194	-108.194	-108.139	-108.139	-108.081	-108.727	-108.327	-108.243	-108.243	-108.19	-108.19	-108.156	-108.727	-108.417	-108.336	-108.336	-108.283	-108.283	-108.244		2.1	-0.519344	-0.0500243	0.0163357	0.0163357	0.0661517	0.0661517	0.121907	-0.480208	-0.0691265	0.00720832	0.00720832	0.0554225	0.0554225	0.0924284	-0.388606	-0.0683362	0.00646691	0.00646691	0.0543199	0.0543199	0.0939469
	2	-0.0350123	0.923564	-108.718	-108.268	-108.188	-108.188	-108.126	-108.126	-108.066	-108.718	-108.33	-108.239	-108.239	-108.18	-108.18	-108.149	-108.718	-108.42	-108.331	-108.331	-108.272	-108.272	-108.236		2.05	-0.511633	-0.0513027	0.0213927	0.0213927	0.0767803	0.0767803	0.134826	-0.472497	-0.0721813	0.0111826	0.0111826	0.064387	0.064387	0.0989938	-0.380895	-0.0712628	0.0104809	0.0104809	0.0633501	0.0633501	0.101797
	1.95	-0.0222752	0.926692	-108.707	-108.268	-108.18	-108.18	-108.112	-108.112	-108.05	-108.707	-108.332	-108.232	-108.232	-108.168	-108.168	-108.143	-108.707	-108.423	-108.325	-108.325	-108.26	-108.26	-108.228		2	-0.502572	-0.052293	0.0275594	0.0275594	0.0891361	0.0891361	0.14929	-0.463436	-0.0750871	0.01612	0.01612	0.0747719	0.0747719	0.105551	-0.371835	-0.0740235	0.0154859	0.0154859	0.0738562	0.0738562	0.110037
	1.9	-0.00816881	0.93021	-108.695	-108.269	-108.171	-108.171	-108.095	-108.095	-108.032	-108.695	-108.335	-108.225	-108.225	-108.154	-108.154	-108.137	-108.695	-108.425	-108.317	-108.317	-108.246	-108.246	-108.219		1.95	-0.491937	-0.0529228	0.0350443	0.0350443	0.103497	0.103497	0.165504	-0.452801	-0.0777686	0.0222122	0.0222122	0.0867927	0.0867927	0.111955	-0.361199	-0.0765434	0.0216794	0.0216794	0.0860723	0.0860723	0.118554
	1.85	0.00747243	0.930805	-108.68	-108.268	-108.16	-108.16	-108.076	-108.076	-108.011	-108.68	-108.337	-108.216	-108.216	-108.138	-108.138	-108.131	-108.68	-108.427	-108.308	-108.308	-108.229	-108.229	-108.21		1.9	-0.479461	-0.0531074	0.0440955	0.0440955	0.12019	0.12019	0.183708	-0.440325	-0.0801305	0.0296888	0.0296888	0.100697	0.100697	0.118068	-0.348723	-0.0787283	0.0292978	0.0292978	0.10027	0.10027	0.127187
	1.8	0.0248422	0.925563	-108.663	-108.267	-108.147	-108.147	-108.053	-108.053	-107.988	-108.663	-108.338	-108.205	-108.205	-108.119	-108.119	-108.126	-108.663	-108.428	-108.296	-108.296	-108.21	-108.21	-108.202		1.85	-0.464833	-0.0527465	0.0550081	0.0550081	0.139595	0.139595	0.20418	-0.425697	-0.0820528	0.0388263	0.0388263	0.116768	0.116768	0.123787	-0.334096	-0.0804606	0.0386244	0.0386244	0.116765	0.116765	0.135734
	1.75	0.044145	0.920338	-108.643	-108.265	-108.132	-108.132	-108.027	-108.027	-107.962	-108.643	-108.339	-108.191	-108.191	-108.098	-108.098	-108.121	-108.643	-108.428	-108.282	-108.282	-108.188	-108.188	-108.195		1.8	-0.447691	-0.0517254	0.0681319	0.0681319	0.162159	0.162159	0.227248	-0.408554	-0.0833858	0.0499545	0.0499545	0.135325	0.135325	0.129064	-0.316953	-0.0815934	0.0499978	0.0499978	0.135919	0.135919	0.143972
	1.7	0.0655979	0.915242	-108.62	-108.263	-108.113	-108.113	-107.997	-107.997	-107.933	-108.62	-108.338	-108.175	-108.175	-108.073	-108.073	-108.116	-108.62	-108.428	-108.266	-108.266	-108.162	-108.162	-108.187		1.75	-0.427606	-0.0499074	0.0838833	0.0838833	0.188407	0.188407	0.253297	-0.38847	-0.0839421	0.0634697	0.0634697	0.156729	0.156729	0.133922	-0.296869	-0.0819442	0.0638216	0.0638216	0.158144	0.158144	0.151704
	1.65	0.0894308	0.910433	-108.592	-108.259	-108.09	-108.09	-107.961	-107.961	-107.899	-108.592	-108.336	-108.155	-108.155	-108.045	-108.045	-108.112	-108.592	-108.426	-108.245	-108.245	-108.133	-108.133	-108.181		1.7	-0.404085	-0.0471336	0.102754	0.102754	0.218952	0.218952	0.28278	-0.364949	-0.0834899	0.0798437	0.0798437	0.181368	0.181368	0.138447	-0.273347	-0.0812865	0.0805751	0.0805751	0.183895	0.183895	0.158809
	1.6	0.115869	0.906121	-108.56	-108.253	-108.063	-108.063	-107.92	-107.92	-107.861	-108.56	-108.333	-108.131	-108.131	-108.013	-108.013	-108.107	-108.56	-108.422	-108.221	-108.221	-108.099	-108.099	-108.175		1.65	-0.376549	-0.0432149	0.125329	0.125329	0.254514	0.254514	0.316233	-0.337413	-0.081741	0.0996375	0.0996375	0.209624	0.209624	0.142785	-0.245811	-0.0793388	0.100826	0.100826	0.213624	0.213624	0.165293
	1.55	0.145088	0.9026	-108.522	-108.246	-108.031	-108.031	-107.871	-107.871	-107.818	-108.522	-108.327	-108.102	-108.102	-108.006	-108.006	-108.103	-108.522	-108.416	-108.192	-108.192	-108.078	-108.078	-108.169		1.6	-0.344334	-0.0379239	0.152296	0.152296	0.295935	0.295935	0.354292	-0.305198	-0.0783378	0.123514	0.123514	0.241252	0.241252	0.147147	-0.213596	-0.0757492	0.125244	0.125244	0.247353	0.247353	0.171324
	1.5	0.177192	0.900296	-108.478	-108.238	-107.993	-107.993	-107.815	-107.815	-107.768	-108.478	-108.319	-108.068	-108.068	-108.015	-108.015	-108.097	-108.478	-108.408	-108.156	-108.156	-108.086	-108.086	-108.163		1.55	-0.306674	-0.0309853	0.184471	0.184471	0.344205	0.344205	0.397699	-0.267538	-0.0728343	0.152251	0.152251	0.248865	0.248865	0.151817	-0.175936	-0.0700756	0.154614	0.154614	0.268051	0.268051	0.177252
	1.45	0.212118	0.899829	-108.427	-108.226	-107.947	-107.947	-107.749	-107.749	-107.711	-108.427	-108.308	-108.027	-108.027	-108.024	-108.024	-108.091	-108.427	-108.396	-108.114	-108.114	-108.095	-108.095	-108.155		1.5	-0.262703	-0.0220496	0.222817	0.222817	0.400489	0.400489	0.447331	-0.223567	-0.0646685	0.186758	0.186758	0.240029	0.240029	0.157188	-0.131965	-0.0617571	0.18985	0.18985	0.260161	0.260161	0.183629
	1.4	0.249515	0.902134	-108.367	-108.212	-107.893	-107.893	-107.673	-107.673	-107.646	-108.367	-108.292	-108.032	-108.032	-107.977	-107.977	-108.082	-108.367	-108.38	-108.102	-108.102	-108.064	-108.064	-108.145		1.45	-0.211455	-0.0106806	0.268466	0.268466	0.466153	0.466153	0.504212	-0.172319	-0.0531312	0.228065	0.228065	0.231075	0.231075	0.163776	-0.080717	-0.050076	0.232002	0.232002	0.25139	0.25139	0.191209
	1.35	0.288549	0.908605	-108.298	-108.194	-107.828	-107.828	-107.583	-107.583	-107.571	-108.298	-108.271	-108.038	-108.038	-107.919	-107.919	-108.071	-108.298	-108.359	-108.107	-108.107	-108.004	-108.004	-108.132		1.4	-0.15189	0.00369153	0.322749	0.322749	0.542813	0.542813	0.569531	-0.112754	-0.0373149	0.222887	0.222887	0.277299	0.277299	0.172264	-0.0211523	-0.0341074	0.243872	0.243872	0.282242	0.282242	0.200995
	1.3	0.327622	0.921286	-108.219	-108.171	-107.752	-107.752	-107.479	-107.479	-107.484	-108.219	-108.242	-108.042	-108.042	-107.851	-107.851	-108.056	-108.219	-108.33	-108.109	-108.109	-107.935	-107.935	-108.114		1.35	-0.0829638	0.0218037	0.387185	0.387185	0.632348	0.632348	0.644644	-0.0438277	-0.0160529	0.216337	0.216337	0.335536	0.335536	0.183521	0.047774	-0.0126515	0.23879	0.23879	0.341792	0.341792	0.214257
	1.25	0.364186	0.894729	-108.129	-108.142	-107.662	-107.662	-107.357	-107.357	-107.385	-108.129	-108.205	-108.035	-108.041	-107.777	-107.777	-108.041	-108.129	-108.293	-108.104	-108.104	-107.855	-107.855	-108.088		1.3	-0.00377561	0.044645	0.463435	0.463435	0.736888	0.736888	0.73105	0.0353605	0.0121721	0.212644	0.212644	0.403261	0.403261	0.198658	0.126962	0.0158537	0.237623	0.237623	0.411678	0.411678	0.232609
	1.2	0.395195	0.857424	-108.029	-108.104	-107.559	-107.559	-107.216	-107.216	-107.272	-108.029	-108.157	-108.032	-108.032	-107.705	-107.705	-108.007	-108.029	-108.244	-108.09	-108.09	-107.771	-107.771	-108.053		1.25	0.0861448	0.0736526	0.553023	0.553023	0.858624	0.858624	0.830304	0.125281	0.049341	0.219148	0.213637	0.477998	0.477998	0.213637	0.216883	0.0534293	0.242367	0.242367	0.491673	0.491673	0.25806
	1.15	0.419149	0.816589	-107.919	-108.054	-107.444	-107.444	-107.058	-107.058	-107.144	-107.919	-108.093	-108.012	-108.012	-107.636	-107.636	-107.968	-107.919	-108.18	-108.065	-108.065	-107.694	-107.694	-108.006		1.2	0.186453	0.111252	0.656481	0.656481	0.999024	0.999024	0.943757	0.225589	0.0979924	0.22224	0.22224	0.549507	0.549507	0.247245	0.317191	0.102613	0.255749	0.255749	0.575355	0.575355	0.293059
	1.1	0.437617	0.776165	-107.801	-107.983	-107.322	-107.322	-106.887	-106.887	-107.001	-107.801	-108.012	-107.973	-107.973	-107.551	-107.551	-107.91	-107.801	-108.098	-108.022	-108.022	-107.608	-107.608	-107.941		1.15	0.29602	0.161912	0.771656	0.771656	1.15706	1.15706	1.07191	0.335156	0.161178	0.243083	0.243083	0.618998	0.618998	0.286993	0.426758	0.166412	0.281463	0.281463	0.652454	0.652454	0.340613
	1.05	0.452364	0.740667	-107.669	-107.885	-107.194	-107.194	-106.703	-106.703	-106.845	-107.669	-107.91	-107.91	-107.908	-107.441	-107.441	-107.826	-107.669	-107.992	-107.957	-107.957	-107.498	-107.498	-107.855		1.1	0.414646	0.232448	0.893743	0.893744	1.32866	1.32866	1.21403	0.453783	0.242463	0.282084	0.282084	0.703423	0.703423	0.344906	0.545384	0.248427	0.324199	0.324199	0.738538	0.738538	0.404794
	1	0.463371	0.711504	-107.516	-107.754	-107.053	-107.053	-106.499	-106.499	-106.666	-107.516	-107.817	-107.817	-107.773	-107.298	-107.298	-107.71	-107.516	-107.862	-107.862	-107.857	-107.356	-107.356	-107.738		1.05	0.546107	0.330068	1.02153	1.02153	1.51262	1.51262	1.37094	0.585243	0.345013	0.345013	0.34681	0.813322	0.813322	0.428378	0.676845	0.35373	0.389519	0.389519	0.848225	0.848225	0.491503
	0.95	0.470497	0.687766	-107.33	-107.58	-106.885	-106.885	-106.261	-106.261	-106.456	-107.33	-107.685	-107.685	-107.598	-107.112	-107.131	-107.552	-107.33	-107.729	-107.729	-107.68	-107.171	-107.186	-107.58		1	0.699046	0.461689	1.16261	1.16261	1.71646	1.71646	1.54899	0.738182	0.438001	0.438001	0.481628	0.956633	0.956633	0.544597	0.829784	0.48419	0.48419	0.489684	0.990699	0.990699	0.608605
	0.9	0.467486	0.67999	-107.282	-107.526	-106.917	-106.86	-106.202	-106.206	-106.335	-107.282	-107.531	-107.516	-107.348	-106.929	-106.973	-107.303	-107.282	-107.574	-107.561	-107.43	-106.986	-107.036	-107.381
	0.85	0.468284	0.662864	-107.035	-107.281	-106.701	-106.645	-105.909	-105.96	-106.069	-107.035	-107.286	-107.272	-107.049	-106.71	-106.754	-107.025	-107.035	-107.326	-107.315	-107.132	-106.759	-106.816	-107.104
	0.8	0.466849	0.647981	-106.706	-106.95	-106.405	-106.348	-105.522	-105.634	-105.718	-106.706	-106.956	-106.943	-106.659	-106.417	-106.455	-106.657	-106.706	-106.993	-106.983	-106.743	-106.458	-106.514	-106.736
	0.75	0.463326	0.62079	-106.266	-106.507	-105.999	-105.943	-105.015	-105.196	-105.252	-106.266	-106.512	-106.5	-106.171	-106.034	-106.046	-106.149	-106.266	-106.548	-106.539	-106.249	-106.069	-106.103	-106.235
	0.7	0.457703	0.586764	-105.678	-105.914	-105.447	-105.391	-104.349	-104.607	-104.635	-105.678	-105.919	-105.908	-105.531	-105.481	-105.489	-105.504	-105.678	-105.953	-105.945	-105.608	-105.536	-105.544	-105.569
	0.65	0.449824	0.551095	-104.894	-105.122	-104.698	-104.643	-103.474	-103.817	-103.818	-104.894	-105.127	-105.116	-104.777	-104.725	-104.744	-104.751	-104.894	-105.16	-105.153	-104.807	-104.749	-104.798	-104.804
	0.6	0.415822	0.540211	-103.87	-104.053	-103.745	-103.691	-102.406	-102.792	-102.83	-103.87	-104.07	-104.047	-103.794	-103.744	-103.749	-103.779	-103.87	-104.108	-104.095	-103.852	-103.787	-103.795	-103.811
	0.55	0.372084	0.520096	-102.521	-102.642	-102.423	-102.374	-100.914	-101.412	-101.463	-102.521	-102.661	-102.639	-102.456	-102.388	-102.393	-102.421	-102.521	-102.695	-102.688	-102.504	-102.431	-102.443	-102.468
	0.5	0.333664	0.481555	-100.681	-100.766	-100.609	-100.56	-98.9156	-99.5677	-99.5968	-100.681	-100.785	-100.764	-100.639	-100.578	-100.579	-100.607	-100.681	-100.822	-100.811	-100.692	-100.628	-100.635	-100.658
	0.98	0.466675	0.701431	-107.447	-107.69	-106.99	-106.99	-106.409	-106.409	-106.587	-107.447	-107.769	-107.769	-107.708	-107.229	-107.229	-107.653	-107.447	-107.814	-107.814	-107.791	-107.287	-107.287	-107.68
	0.97	0.468097	0.696693	-107.409	-107.655	-106.956	-106.956	-106.361	-106.361	-106.545	-107.409	-107.743	-107.743	-107.673	-107.192	-107.192	-107.621	-107.409	-107.788	-107.788	-107.756	-107.25	-107.25	-107.649
	0.96	0.46937	0.692142	-107.371	-107.618	-106.921	-106.921	-106.312	-106.312	-106.501	-107.371	-107.715	-107.715	-107.637	-107.153	-107.158	-107.588	-107.371	-107.759	-107.759	-107.719	-107.212	-107.212	-107.616
	0.95	0.470498	0.687765	-107.33	-107.58	-106.885	-106.885	-106.261	-106.261	-106.456	-107.33	-107.685	-107.685	-107.598	-107.112	-107.131	-107.552	-107.33	-107.729	-107.729	-107.68	-107.171	-107.186	-107.58
	0.94	0.471486	0.683556	-107.287	-107.539	-106.847	-106.847	-106.208	-106.208	-106.408	-107.287	-107.653	-107.653	-107.557	-107.069	-107.102	-107.515	-107.287	-107.697	-107.697	-107.639	-107.128	-107.158	-107.543
	0.93	0.472338	0.679506	-107.243	-107.495	-106.807	-106.807	-106.153	-106.153	-106.359	-107.243	-107.62	-107.62	-107.513	-107.023	-107.072	-107.475	-107.243	-107.663	-107.663	-107.595	-107.083	-107.127	-107.503
	0.92	0.473057	0.675608	-107.196	-107.45	-106.764	-106.764	-106.095	-106.095	-106.307	-107.196	-107.583	-107.583	-107.468	-106.983	-107.04	-107.433	-107.196	-107.627	-107.627	-107.55	-107.036	-107.094	-107.461
	0.91	0.473648	0.671858	-107.147	-107.402	-106.72	-106.72	-106.035	-106.035	-106.253	-107.147	-107.545	-107.545	-107.42	-106.949	-107.005	-107.389	-107.147	-107.588	-107.588	-107.501	-107.005	-107.06	-107.417
	0.9	0.474118	0.668246	-107.095	-107.351	-106.674	-106.674	-105.972	-105.972	-106.196	-107.095	-107.504	-107.504	-107.369	-106.913	-106.969	-107.342	-107.095	-107.547	-107.547	-107.45	-106.969	-107.023	-107.37
	0.89	0.474468	0.664768	-107.041	-107.297	-106.625	-106.625	-105.907	-105.907	-106.137	-107.041	-107.461	-107.461	-107.316	-106.875	-106.93	-107.292	-107.041	-107.503	-107.503	-107.397	-106.93	-106.984	-107.32
	0.88	0.468087	0.672854	-107.192	-107.437	-106.839	-106.782	-106.097	-106.114	-106.237	-107.192	-107.442	-107.428	-107.238	-106.849	-106.894	-107.201	-107.192	-107.484	-107.472	-107.32	-106.906	-106.956	-107.28
	0.87	0.468247	0.669428	-107.143	-107.388	-106.796	-106.739	-106.037	-106.066	-106.184	-107.143	-107.393	-107.379	-107.179	-106.806	-106.85	-107.146	-107.143	-107.434	-107.423	-107.261	-106.855	-106.912	-107.224
	0.86	0.468311	0.6661	-107.091	-107.336	-106.75	-106.693	-105.975	-106.015	-106.128	-107.091	-107.341	-107.327	-107.116	-106.759	-106.804	-107.087	-107.091	-107.382	-107.371	-107.198	-106.808	-106.865	-107.166
	0.85	0.468284	0.662864	-107.035	-107.281	-106.701	-106.645	-105.909	-105.96	-106.069	-107.035	-107.286	-107.272	-107.049	-106.71	-106.754	-107.025	-107.035	-107.326	-107.315	-107.132	-106.759	-106.816	-107.104
	0.84	0.468169	0.659718	-106.977	-107.222	-106.649	-106.592	-105.84	-105.903	-106.006	-106.977	-107.228	-107.214	-106.98	-106.657	-106.702	-106.96	-106.977	-107.267	-107.257	-107.062	-106.706	-106.762	-107.038
	0.83	0.467967	0.656658	-106.915	-107.16	-106.594	-106.537	-105.767	-105.841	-105.94	-106.915	-107.166	-107.152	-106.906	-106.601	-106.645	-106.89	-106.915	-107.204	-107.194	-106.989	-106.65	-106.706	-106.969
	0.82	0.467677	0.653685	-106.849	-107.094	-106.535	-106.478	-105.689	-105.776	-105.87	-106.849	-107.1	-107.086	-106.828	-106.541	-106.586	-106.817	-106.849	-107.138	-107.128	-106.911	-106.59	-106.646	-106.895
	0.81	0.467304	0.650793	-106.78	-107.024	-106.472	-106.415	-105.608	-105.707	-105.796	-106.78	-107.03	-107.017	-106.746	-106.48	-106.522	-106.739	-106.78	-107.068	-107.058	-106.829	-106.526	-106.582	-106.818
	0.8	0.466848	0.647981	-106.706	-106.95	-106.405	-106.348	-105.522	-105.634	-105.718	-106.706	-106.956	-106.943	-106.659	-106.417	-106.455	-106.657	-106.706	-106.993	-106.983	-106.743	-106.458	-106.514	-106.736
	0.79	0.466315	0.645241	-106.628	-106.871	-106.333	-106.277	-105.431	-105.557	-105.635	-106.628	-106.877	-106.864	-106.571	-106.351	-106.383	-106.568	-106.628	-106.914	-106.905	-106.652	-106.39	-106.441	-106.649
	0.78	0.465687	0.640346	-106.545	-106.788	-106.257	-106.201	-105.335	-105.474	-105.547	-106.545	-106.793	-106.781	-106.479	-106.279	-106.306	-106.471	-106.545	-106.83	-106.821	-106.557	-106.317	-106.364	-106.556
	0.77	0.464983	0.633901	-106.457	-106.7	-106.176	-106.12	-105.234	-105.387	-105.454	-106.457	-106.705	-106.693	-106.382	-106.203	-106.225	-106.37	-106.457	-106.741	-106.732	-106.46	-106.24	-106.283	-106.454
	0.76	0.464196	0.627382	-106.364	-106.606	-106.09	-106.034	-105.127	-105.294	-105.356	-106.364	-106.611	-106.599	-106.279	-106.121	-106.138	-106.262	-106.364	-106.647	-106.639	-106.358	-106.157	-106.196	-106.347
	0.75	0.463326	0.62079	-106.266	-106.507	-105.999	-105.943	-105.015	-105.196	-105.252	-106.266	-106.512	-106.5	-106.171	-106.034	-106.046	-106.149	-106.266	-106.548	-106.539	-106.249	-106.069	-106.103	-106.235
	0.74	0.462372	0.614125	-106.161	-106.401	-105.902	-105.845	-104.896	-105.091	-105.142	-106.161	-106.407	-106.395	-106.057	-105.941	-105.948	-106.03	-106.161	-106.442	-106.434	-106.135	-105.976	-106.005	-106.115
	0.73	0.461335	0.607389	-106.051	-106.29	-105.798	-105.742	-104.77	-104.98	-105.026	-106.051	-106.295	-106.283	-105.936	-105.842	-105.844	-105.903	-106.051	-106.33	-106.322	-106.014	-105.876	-105.9	-105.99
	0.72	0.460213	0.600582	-105.934	-106.172	-105.688	-105.632	-104.637	-104.863	-104.903	-105.934	-106.177	-106.165	-105.808	-105.733	-105.737	-105.77	-105.934	-106.212	-106.204	-105.886	-105.77	-105.789	-105.857
	0.71	0.459003	0.593707	-105.81	-106.046	-105.571	-105.515	-104.497	-104.739	-104.773	-105.81	-106.052	-106.04	-105.673	-105.615	-105.624	-105.63	-105.81	-106.086	-106.078	-105.751	-105.657	-105.67	-105.717
	0.7	0.457703	0.586764	-105.678	-105.914	-105.447	-105.391	-104.349	-104.607	-104.635	-105.678	-105.919	-105.908	-105.531	-105.481	-105.489	-105.504	-105.678	-105.953	-105.945	-105.608	-105.536	-105.544	-105.569
	0.69	0.456314	0.579756	-105.539	-105.773	-105.315	-105.259	-104.193	-104.467	-104.49	-105.539	-105.778	-105.767	-105.382	-105.351	-105.354	-105.376	-105.539	-105.812	-105.805	-105.458	-105.408	-105.41	-105.413
	0.68	0.454834	0.572683	-105.391	-105.624	-105.174	-105.119	-104.028	-104.318	-104.336	-105.391	-105.629	-105.618	-105.24	-105.205	-105.215	-105.23	-105.391	-105.663	-105.655	-105.3	-105.267	-105.27	-105.271
	0.67	0.453264	0.565548	-105.235	-105.466	-105.025	-104.97	-103.853	-104.161	-104.173	-105.235	-105.472	-105.46	-105.095	-105.043	-105.07	-105.075	-105.235	-105.505	-105.497	-105.136	-105.11	-105.124	-105.126
	0.66	0.451595	0.558351	-105.07	-105.299	-104.867	-104.812	-103.669	-103.994	-104	-105.07	-105.304	-105.293	-104.941	-104.889	-104.914	-104.915	-105.07	-105.338	-105.33	-104.971	-104.938	-104.969	-104.97
	0.65	0.449819	0.551094	-104.894	-105.122	-104.698	-104.643	-103.474	-103.817	-103.818	-104.894	-105.127	-105.116	-104.777	-104.725	-104.744	-104.751	-104.894	-105.16	-105.153	-104.807	-104.749	-104.798	-104.804
	0.64	0.438941	0.548555	-104.739	-104.923	-104.587	-104.537	-103.349	-103.689	-103.708	-104.739	-104.942	-104.919	-104.624	-104.553	-104.56	-104.586	-104.739	-104.975	-104.971	-104.672	-104.6	-104.612	-104.635
	0.63	0.445979	0.536411	-104.511	-104.735	-104.33	-104.275	-103.05	-103.421	-103.431	-104.511	-104.74	-104.73	-104.416	-104.364	-104.373	-104.391	-104.511	-104.773	-104.766	-104.445	-104.388	-104.425	-104.442
	0.62	0.443904	0.528987	-104.302	-104.524	-104.128	-104.073	-102.819	-103.205	-103.22	-104.302	-104.53	-104.519	-104.218	-104.166	-104.17	-104.193	-104.302	-104.563	-104.555	-104.247	-104.19	-104.222	-104.244
	0.61	0.441703	0.521508	-104.081	-104.301	-103.913	-103.859	-102.576	-102.977	-102.996	-104.081	-104.306	-104.296	-104.008	-103.955	-103.956	-103.982	-104.081	-104.339	-104.332	-104.036	-103.979	-104.006	-104.033
	0.6	0.409609	0.540007	-103.897	-104.053	-103.77	-103.72	-102.419	-102.818	-102.856	-103.897	-104.073	-104.05	-103.805	-103.735	-103.742	-103.768	-103.897	-104.105	-104.1	-103.852	-103.78	-103.792	-103.815
	0.59	0.436947	0.506396	-103.598	-103.813	-103.444	-103.39	-102.045	-102.48	-102.508	-103.598	-103.819	-103.808	-103.546	-103.485	-103.494	-103.521	-103.598	-103.852	-103.844	-103.574	-103.518	-103.518	-103.57
	0.58	0.394708	0.535149	-103.395	-103.537	-103.279	-103.23	-101.868	-102.302	-102.348	-103.395	-103.556	-103.534	-103.313	-103.245	-103.251	-103.277	-103.395	-103.589	-103.584	-103.361	-103.288	-103.301	-103.325
	0.57	0.431742	0.491086	-103.056	-103.266	-102.915	-102.861	-101.452	-101.926	-101.959	-103.056	-103.272	-103.261	-103.025	-102.954	-102.972	-103	-103.056	-103.305	-103.297	-103.053	-102.996	-102.996	-103.048
	0.56	0.379661	0.527748	-102.829	-102.958	-102.726	-102.676	-101.251	-101.725	-101.775	-102.829	-102.977	-102.955	-102.759	-102.691	-102.696	-102.724	-102.829	-103.01	-103.004	-102.807	-102.734	-102.746	-102.771
	0.55	0.372083	0.520097	-102.521	-102.642	-102.423	-102.374	-100.914	-101.412	-101.463	-102.521	-102.661	-102.639	-102.456	-102.388	-102.393	-102.421	-102.521	-102.695	-102.688	-102.504	-102.431	-102.443	-102.468
	0.54	0.36447	0.512428	-102.194	-102.308	-102.102	-102.052	-100.558	-101.081	-101.131	-102.194	-102.327	-102.305	-102.134	-102.066	-102.071	-102.099	-102.194	-102.361	-102.354	-102.183	-102.109	-102.121	-102.147
	0.53	0.356821	0.504738	-101.847	-101.955	-101.761	-101.711	-100.182	-100.732	-100.78	-101.847	-101.974	-101.952	-101.792	-101.725	-101.73	-101.758	-101.847	-102.008	-102	-101.842	-101.767	-101.78	-101.807
	0.52	0.349136	0.497029	-101.48	-101.581	-101.399	-101.35	-99.7829	-100.363	-100.408	-101.48	-101.599	-101.578	-101.43	-101.363	-101.368	-101.396	-101.48	-101.634	-101.626	-101.48	-101.406	-101.418	-101.446
	0.51	0.341416	0.489302	-101.092	-101.185	-101.016	-100.966	-99.3613	-99.9757	-100.014	-101.092	-101.204	-101.182	-101.046	-100.98	-100.984	-101.013	-101.092	-101.24	-101.23	-101.098	-101.022	-101.034	-101.063
	0.5	0.333664	0.481555	-100.681	-100.766	-100.609	-100.56	-98.9156	-99.5677	-99.5968	-100.681	-100.785	-100.764	-100.639	-100.578	-100.579	-100.607	-100.681	-100.822	-100.811	-100.692	-100.628	-100.635	-100.658
	4.5	-0.172359	0.949828	-108.777	-108.346	-108.345	-108.345	-108.345	-108.345	-108.344	0
	4.49	-0.17232	0.949538	-108.777	-108.346	-108.345	-108.345	-108.345	-108.345	-108.344	0
	4.48	-0.172281	0.949241	-108.777	-108.346	-108.345	-108.345	-108.345	-108.345	-108.344	0
	4.47	-0.172241	0.948937	-108.777	-108.346	-108.345	-108.345	-108.345	-108.345	-108.344	0
	4.46	-0.172201	0.948626	-108.777	-108.346	-108.345	-108.345	-108.345	-108.345	-108.344	0
	4.45	-0.17216	0.948309	-108.777	-108.346	-108.345	-108.345	-108.345	-108.345	-108.344	0
	4.44	-0.172118	0.947985	-108.777	-108.346	-108.345	-108.345	-108.345	-108.345	-108.344	0
	4.43	-0.172075	0.947653	-108.777	-108.346	-108.345	-108.345	-108.345	-108.345	-108.344	0
	4.42	-0.172031	0.947315	-108.777	-108.346	-108.345	-108.345	-108.345	-108.345	-108.344	0
	4.41	-0.171987	0.94697	-108.777	-108.347	-108.345	-108.345	-108.345	-108.345	-108.344	0
	4.4	-0.171942	0.946618	-108.777	-108.347	-108.345	-108.345	-108.345	-108.345	-108.344	0
	4.39	-0.171895	0.946258	-108.777	-108.347	-108.345	-108.345	-108.345	-108.345	-108.344	0
	4.38	-0.171848	0.945891	-108.777	-108.347	-108.345	-108.345	-108.345	-108.345	-108.344	0
	4.37	-0.1718	0.945517	-108.777	-108.347	-108.345	-108.345	-108.345	-108.345	-108.344	0
	4.36	-0.171751	0.945134	-108.777	-108.347	-108.345	-108.345	-108.345	-108.345	-108.344	0
	4.35	-0.171701	0.944744	-108.777	-108.347	-108.345	-108.345	-108.345	-108.345	-108.344	0
	4.34	-0.17165	0.944347	-108.777	-108.347	-108.345	-108.345	-108.345	-108.345	-108.344	0
	4.33	-0.171598	0.943941	-108.777	-108.347	-108.345	-108.345	-108.345	-108.345	-108.344	0
	4.32	-0.171545	0.943527	-108.777	-108.347	-108.345	-108.345	-108.345	-108.345	-108.344	0
	4.31	-0.171491	0.943106	-108.777	-108.347	-108.345	-108.345	-108.345	-108.345	-108.343	0
	4.3	-0.171436	0.942676	-108.777	-108.347	-108.345	-108.345	-108.345	-108.345	-108.343	0
	4.29	-0.17138	0.942238	-108.777	-108.347	-108.345	-108.345	-108.345	-108.345	-108.343	0
	4.28	-0.171323	0.941791	-108.777	-108.347	-108.345	-108.345	-108.345	-108.345	-108.343	0
	4.27	-0.171265	0.941336	-108.777	-108.347	-108.345	-108.345	-108.345	-108.345	-108.343	0
	4.26	-0.171206	0.940873	-108.777	-108.347	-108.345	-108.345	-108.345	-108.345	-108.343	0
	4.25	-0.171146	0.940401	-108.777	-108.347	-108.345	-108.345	-108.345	-108.345	-108.343	0
	4.24	-0.171085	0.93992	-108.777	-108.347	-108.345	-108.345	-108.345	-108.345	-108.343	0
	4.23	-0.171022	0.93943	-108.777	-108.347	-108.345	-108.345	-108.345	-108.345	-108.343	0
	4.22	-0.170959	0.938932	-108.777	-108.347	-108.345	-108.345	-108.345	-108.345	-108.343	0
	4.21	-0.170894	0.938424	-108.777	-108.347	-108.345	-108.345	-108.345	-108.345	-108.343	0
	4.2	-0.170828	0.937908	-108.777	-108.347	-108.345	-108.345	-108.345	-108.345	-108.343	0
	4.19	-0.170761	0.937383	-108.777	-108.348	-108.345	-108.345	-108.345	-108.345	-108.343	0
	4.18	-0.170693	0.936848	-108.777	-108.348	-108.345	-108.345	-108.345	-108.345	-108.343	0
	4.17	-0.170624	0.936304	-108.777	-108.348	-108.345	-108.345	-108.345	-108.345	-108.343	0
	4.16	-0.170553	0.935751	-108.777	-108.348	-108.345	-108.345	-108.345	-108.345	-108.343	0
	4.15	-0.170481	0.935189	-108.777	-108.348	-108.345	-108.345	-108.345	-108.345	-108.343	0
	4.14	-0.170408	0.934617	-108.777	-108.348	-108.345	-108.345	-108.345	-108.345	-108.343	0
	4.13	-0.170333	0.934036	-108.777	-108.348	-108.345	-108.345	-108.345	-108.345	-108.343	0
	4.12	-0.170258	0.933445	-108.777	-108.348	-108.346	-108.346	-108.345	-108.345	-108.343	0
	4.11	-0.170181	0.932845	-108.777	-108.348	-108.346	-108.346	-108.345	-108.345	-108.343	0
	4.1	-0.170102	0.932235	-108.777	-108.348	-108.346	-108.346	-108.345	-108.345	-108.343	0
	4.09	-0.170023	0.931616	-108.777	-108.348	-108.346	-108.346	-108.345	-108.345	-108.343	0
	4.08	-0.169941	0.930987	-108.777	-108.348	-108.346	-108.346	-108.345	-108.345	-108.342	0
	4.07	-0.169859	0.930349	-108.777	-108.348	-108.346	-108.346	-108.345	-108.345	-108.342	0
	4.06	-0.169775	0.929701	-108.777	-108.348	-108.346	-108.346	-108.345	-108.345	-108.342	0
	4.05	-0.16969	0.929043	-108.777	-108.348	-108.346	-108.346	-108.345	-108.345	-108.342	0
	4.04	-0.169603	0.928375	-108.777	-108.348	-108.346	-108.346	-108.345	-108.345	-108.342	0
	4.03	-0.169515	0.927698	-108.777	-108.349	-108.346	-108.346	-108.345	-108.345	-108.342	0
	4.02	-0.169425	0.927012	-108.777	-108.349	-108.346	-108.346	-108.345	-108.345	-108.342	0
	4.01	-0.169334	0.926316	-108.777	-108.349	-108.346	-108.346	-108.345	-108.345	-108.342	0
	4	-0.169241	0.92561	-108.777	-108.349	-108.346	-108.346	-108.345	-108.345	-108.342	0
	3.99	-0.169147	0.924894	-108.777	-108.349	-108.346	-108.346	-108.345	-108.345	-108.342	0
	3.98	-0.169051	0.924169	-108.777	-108.349	-108.346	-108.346	-108.345	-108.345	-108.342	0
	3.97	-0.168954	0.923435	-108.777	-108.349	-108.346	-108.346	-108.345	-108.345	-108.342	0
	3.96	-0.168855	0.922691	-108.777	-108.349	-108.346	-108.346	-108.345	-108.345	-108.342	0
	3.95	-0.168754	0.921938	-108.777	-108.349	-108.346	-108.346	-108.345	-108.345	-108.342	0
	3.94	-0.168652	0.921175	-108.777	-108.349	-108.346	-108.346	-108.345	-108.345	-108.342	0
	3.93	-0.168548	0.920403	-108.777	-108.349	-108.346	-108.346	-108.345	-108.345	-108.342	0
	3.92	-0.168442	0.919622	-108.777	-108.349	-108.346	-108.346	-108.345	-108.345	-108.341	0
	3.91	-0.168334	0.918832	-108.777	-108.349	-108.346	-108.346	-108.345	-108.345	-108.341	0
	3.9	-0.168225	0.918033	-108.777	-108.35	-108.346	-108.346	-108.345	-108.345	-108.341	0
	3.89	-0.168114	0.917226	-108.777	-108.35	-108.346	-108.346	-108.345	-108.345	-108.341	0
	3.88	-0.168002	0.916409	-108.777	-108.35	-108.346	-108.346	-108.345	-108.345	-108.341	0
	3.87	-0.167887	0.915584	-108.777	-108.35	-108.346	-108.346	-108.345	-108.345	-108.341	0
	3.86	-0.167771	0.91475	-108.777	-108.35	-108.346	-108.346	-108.345	-108.345	-108.341	0
	3.85	-0.167652	0.913908	-108.777	-108.35	-108.346	-108.346	-108.345	-108.345	-108.341	0
	3.84	-0.167532	0.913058	-108.777	-108.35	-108.346	-108.346	-108.345	-108.345	-108.341	0
	3.83	-0.16741	0.9122	-108.777	-108.35	-108.346	-108.346	-108.345	-108.345	-108.341	0
	3.82	-0.167286	0.911335	-108.777	-108.35	-108.346	-108.346	-108.345	-108.345	-108.341	0
	3.81	-0.16716	0.910461	-108.777	-108.35	-108.346	-108.346	-108.345	-108.345	-108.341	0
	3.8	-0.167032	0.909579	-108.777	-108.351	-108.346	-108.346	-108.345	-108.345	-108.341	0
	3.79	-0.166902	0.908691	-108.777	-108.351	-108.346	-108.346	-108.345	-108.345	-108.34	0
	3.78	-0.16677	0.907796	-108.777	-108.351	-108.346	-108.346	-108.345	-108.345	-108.34	0
	3.77	-0.166636	0.906894	-108.777	-108.351	-108.346	-108.346	-108.345	-108.345	-108.34	0
	3.76	-0.166499	0.905986	-108.777	-108.351	-108.346	-108.346	-108.345	-108.345	-108.34	0
	3.75	-0.166361	0.905072	-108.777	-108.351	-108.346	-108.346	-108.345	-108.345	-108.34	0
	3.74	-0.16622	0.904152	-108.777	-108.351	-108.346	-108.346	-108.345	-108.345	-108.34	0
	3.73	-0.166077	0.903226	-108.777	-108.351	-108.346	-108.346	-108.345	-108.345	-108.34	0
	3.72	-0.165932	0.902294	-108.777	-108.351	-108.346	-108.346	-108.345	-108.345	-108.34	0
	3.71	-0.165784	0.901358	-108.777	-108.352	-108.346	-108.346	-108.345	-108.345	-108.34	0
	3.7	-0.165634	0.900417	-108.777	-108.352	-108.346	-108.346	-108.345	-108.345	-108.34	0
	3.69	-0.165482	0.899471	-108.777	-108.352	-108.346	-108.346	-108.345	-108.345	-108.339	0
	3.68	-0.165327	0.898521	-108.777	-108.352	-108.346	-108.346	-108.345	-108.345	-108.339	0
	3.67	-0.16517	0.897568	-108.777	-108.352	-108.346	-108.346	-108.345	-108.345	-108.339	0
	3.66	-0.16501	0.896611	-108.777	-108.352	-108.346	-108.346	-108.345	-108.345	-108.339	0
	3.65	-0.164848	0.895651	-108.777	-108.352	-108.346	-108.346	-108.345	-108.345	-108.339	0
	3.64	-0.164684	0.894689	-108.777	-108.353	-108.346	-108.346	-108.345	-108.345	-108.339	0
	3.63	-0.164517	0.893725	-108.777	-108.353	-108.346	-108.346	-108.345	-108.345	-108.339	0
	3.62	-0.164347	0.892758	-108.777	-108.353	-108.347	-108.347	-108.345	-108.345	-108.339	0
	3.61	-0.164174	0.891791	-108.777	-108.353	-108.347	-108.347	-108.345	-108.345	-108.339	0
	3.6	-0.163999	0.890823	-108.777	-108.353	-108.347	-108.347	-108.345	-108.345	-108.338	0
	3.59	-0.163821	0.889854	-108.777	-108.353	-108.347	-108.347	-108.345	-108.345	-108.338	0
	3.58	-0.16364	0.888885	-108.777	-108.353	-108.347	-108.347	-108.345	-108.345	-108.338	0
	3.57	-0.163457	0.887917	-108.777	-108.354	-108.347	-108.347	-108.345	-108.345	-108.338	0
	3.56	-0.163271	0.88695	-108.777	-108.354	-108.347	-108.347	-108.345	-108.345	-108.338	0
	3.55	-0.163081	0.885984	-108.777	-108.354	-108.347	-108.347	-108.345	-108.345	-108.338	0
	3.54	-0.162889	0.88502	-108.777	-108.354	-108.347	-108.347	-108.345	-108.345	-108.338	0
	3.53	-0.162694	0.884059	-108.777	-108.354	-108.347	-108.347	-108.345	-108.345	-108.338	0
	3.52	-0.162495	0.883101	-108.777	-108.354	-108.347	-108.347	-108.345	-108.345	-108.337	0
	3.51	-0.162294	0.882147	-108.777	-108.355	-108.347	-108.347	-108.345	-108.345	-108.337	0
	3.5	-0.162089	0.881197	-108.777	-108.355	-108.347	-108.347	-108.345	-108.345	-108.337	0
	3.49	-0.161882	0.880252	-108.777	-108.355	-108.347	-108.347	-108.345	-108.345	-108.337	0
	3.48	-0.161671	0.879312	-108.777	-108.355	-108.347	-108.347	-108.345	-108.345	-108.337	0
	3.47	-0.161456	0.878379	-108.777	-108.355	-108.347	-108.347	-108.344	-108.344	-108.337	0
	3.46	-0.161239	0.877451	-108.777	-108.355	-108.347	-108.347	-108.344	-108.344	-108.337	0
	3.45	-0.161018	0.876532	-108.777	-108.356	-108.347	-108.347	-108.344	-108.344	-108.336	0
	3.44	-0.160793	0.87562	-108.777	-108.356	-108.347	-108.347	-108.344	-108.344	-108.336	0
	3.43	-0.160565	0.874716	-108.777	-108.356	-108.347	-108.347	-108.344	-108.344	-108.336	0
	3.42	-0.160334	0.873822	-108.777	-108.356	-108.347	-108.347	-108.344	-108.344	-108.336	0
	3.41	-0.160098	0.872937	-108.777	-108.356	-108.347	-108.347	-108.344	-108.344	-108.336	0
	3.4	-0.15986	0.872063	-108.777	-108.357	-108.347	-108.347	-108.344	-108.344	-108.336	0
	3.39	-0.159617	0.8712	-108.777	-108.357	-108.347	-108.347	-108.344	-108.344	-108.335	0
	3.38	-0.159371	0.870349	-108.777	-108.357	-108.347	-108.347	-108.344	-108.344	-108.335	0
	3.37	-0.159121	0.86951	-108.777	-108.357	-108.347	-108.347	-108.344	-108.344	-108.335	0
	3.36	-0.158867	0.868685	-108.777	-108.357	-108.348	-108.348	-108.344	-108.344	-108.335	0
	3.35	-0.158609	0.867873	-108.777	-108.358	-108.348	-108.348	-108.344	-108.344	-108.335	0
	3.34	-0.158346	0.867076	-108.777	-108.358	-108.348	-108.348	-108.344	-108.344	-108.334	0
	3.33	-0.15808	0.866295	-108.777	-108.358	-108.348	-108.348	-108.344	-108.344	-108.334	0
	3.32	-0.15781	0.86553	-108.777	-108.358	-108.348	-108.348	-108.344	-108.344	-108.334	0
	3.31	-0.157536	0.864781	-108.776	-108.358	-108.348	-108.348	-108.344	-108.344	-108.334	0
	3.3	-0.157257	0.864051	-108.776	-108.359	-108.348	-108.348	-108.344	-108.344	-108.334	0
	3.29	-0.156974	0.863338	-108.776	-108.359	-108.348	-108.348	-108.344	-108.344	-108.333	0
	3.28	-0.156686	0.862645	-108.776	-108.359	-108.348	-108.348	-108.344	-108.344	-108.333	0
	3.27	-0.156395	0.861971	-108.776	-108.359	-108.348	-108.348	-108.344	-108.344	-108.333	0
	3.26	-0.156098	0.861318	-108.776	-108.36	-108.348	-108.348	-108.344	-108.344	-108.333	0
	3.25	-0.155797	0.860687	-108.776	-108.36	-108.348	-108.348	-108.344	-108.344	-108.333	0
	3.24	-0.155491	0.860077	-108.776	-108.36	-108.348	-108.348	-108.344	-108.344	-108.332	0
	3.23	-0.155181	0.859491	-108.776	-108.36	-108.348	-108.348	-108.344	-108.344	-108.332	0
	3.22	-0.154865	0.858928	-108.776	-108.361	-108.348	-108.348	-108.344	-108.344	-108.332	0
	3.21	-0.154545	0.85839	-108.776	-108.361	-108.348	-108.348	-108.344	-108.344	-108.332	0
	3.2	-0.15422	0.857877	-108.776	-108.361	-108.348	-108.348	-108.344	-108.344	-108.331	0
	3.19	-0.15389	0.85739	-108.776	-108.361	-108.348	-108.348	-108.344	-108.344	-108.331	0
	3.18	-0.153555	0.856929	-108.776	-108.362	-108.348	-108.348	-108.344	-108.344	-108.331	0
	3.17	-0.153214	0.856497	-108.776	-108.362	-108.348	-108.348	-108.343	-108.343	-108.331	0
	3.16	-0.152868	0.856093	-108.776	-108.362	-108.349	-108.349	-108.343	-108.343	-108.33	0
	3.15	-0.152517	0.855718	-108.776	-108.363	-108.349	-108.349	-108.343	-108.343	-108.33	0
	3.14	-0.152161	0.855373	-108.776	-108.363	-108.349	-108.349	-108.343	-108.343	-108.33	0
	3.13	-0.151799	0.855058	-108.776	-108.363	-108.349	-108.349	-108.343	-108.343	-108.329	0
	3.12	-0.151431	0.854776	-108.776	-108.363	-108.349	-108.349	-108.343	-108.343	-108.329	0
	3.11	-0.151058	0.854525	-108.776	-108.364	-108.349	-108.349	-108.343	-108.343	-108.329	0
	3.1	-0.150678	0.854308	-108.776	-108.364	-108.349	-108.349	-108.343	-108.343	-108.329	0
	3.09	-0.150294	0.854124	-108.776	-108.364	-108.349	-108.349	-108.343	-108.343	-108.328	0
	3.08	-0.149903	0.853975	-108.776	-108.365	-108.349	-108.349	-108.343	-108.343	-108.328	0
	3.07	-0.149506	0.853861	-108.776	-108.365	-108.349	-108.349	-108.343	-108.343	-108.328	0
	3.06	-0.149103	0.853784	-108.776	-108.365	-108.349	-108.349	-108.343	-108.343	-108.327	0
	3.05	-0.148694	0.853743	-108.776	-108.366	-108.349	-108.349	-108.343	-108.343	-108.327	0
	3.04	-0.148278	0.85374	-108.776	-108.366	-108.349	-108.349	-108.343	-108.343	-108.327	0
	3.03	-0.147856	0.853776	-108.775	-108.366	-108.349	-108.349	-108.343	-108.343	-108.326	0
	3.02	-0.147428	0.853851	-108.775	-108.367	-108.349	-108.349	-108.342	-108.342	-108.326	0
	3.01	-0.146993	0.853965	-108.775	-108.367	-108.349	-108.349	-108.342	-108.342	-108.326	0
	3	-0.146551	0.85412	-108.775	-108.367	-108.35	-108.35	-108.342	-108.342	-108.325	0
	2.99	-0.146103	0.854317	-108.775	-108.368	-108.35	-108.35	-108.342	-108.342	-108.325	0
	2.98	-0.145647	0.854555	-108.775	-108.368	-108.35	-108.35	-108.342	-108.342	-108.325	0
	2.97	-0.145185	0.854836	-108.775	-108.368	-108.35	-108.35	-108.342	-108.342	-108.324	0
	2.96	-0.144715	0.855161	-108.775	-108.369	-108.35	-108.35	-108.342	-108.342	-108.324	0
	2.95	-0.144239	0.85553	-108.775	-108.369	-108.35	-108.35	-108.342	-108.342	-108.324	0
	2.94	-0.143755	0.855944	-108.775	-108.37	-108.35	-108.35	-108.342	-108.342	-108.323	0
	2.93	-0.143264	0.856403	-108.775	-108.37	-108.35	-108.35	-108.341	-108.341	-108.323	0
	2.92	-0.142765	0.856908	-108.775	-108.37	-108.35	-108.35	-108.341	-108.341	-108.322	0
	2.91	-0.142258	0.857461	-108.775	-108.371	-108.35	-108.35	-108.341	-108.341	-108.322	0
	2.9	-0.141744	0.85806	-108.775	-108.371	-108.35	-108.35	-108.341	-108.341	-108.322	0
	2.89	-0.141222	0.858708	-108.774	-108.371	-108.35	-108.35	-108.341	-108.341	-108.321	0
	2.88	-0.140693	0.859401	-108.774	-108.372	-108.35	-108.35	-108.341	-108.341	-108.321	0
	2.87	-0.140155	0.860147	-108.774	-108.372	-108.35	-108.35	-108.341	-108.341	-108.32	0
	2.86	-0.139608	0.860943	-108.774	-108.373	-108.35	-108.35	-108.341	-108.341	-108.32	0
	2.85	-0.139053	0.861789	-108.774	-108.373	-108.35	-108.35	-108.34	-108.34	-108.32	0
	2.84	-0.13849	0.862686	-108.774	-108.374	-108.351	-108.351	-108.34	-108.34	-108.319	0
	2.83	-0.137918	0.863635	-108.774	-108.374	-108.351	-108.351	-108.34	-108.34	-108.319	0
	2.82	-0.137337	0.864637	-108.774	-108.374	-108.351	-108.351	-108.34	-108.34	-108.318	0
	2.81	-0.136747	0.865691	-108.774	-108.375	-108.351	-108.351	-108.34	-108.34	-108.318	0
	2.8	-0.136148	0.866798	-108.773	-108.375	-108.351	-108.351	-108.34	-108.34	-108.317	0
	2.79	-0.13554	0.867959	-108.773	-108.376	-108.351	-108.351	-108.339	-108.339	-108.317	0
	2.78	-0.134922	0.869174	-108.773	-108.376	-108.351	-108.351	-108.339	-108.339	-108.316	0
	2.77	-0.134295	0.870444	-108.773	-108.377	-108.351	-108.351	-108.339	-108.339	-108.316	0
	2.76	-0.133658	0.871769	-108.773	-108.377	-108.351	-108.351	-108.339	-108.339	-108.315	0
	2.75	-0.133012	0.87315	-108.773	-108.377	-108.351	-108.351	-108.339	-108.339	-108.315	0
	2.74	-0.132355	0.874587	-108.772	-108.378	-108.351	-108.351	-108.338	-108.338	-108.314	0
	2.73	-0.131688	0.87608	-108.772	-108.378	-108.351	-108.351	-108.338	-108.338	-108.314	0
	2.72	-0.131011	0.87763	-108.772	-108.379	-108.351	-108.351	-108.338	-108.338	-108.313	0
	2.71	-0.130323	0.879237	-108.772	-108.379	-108.351	-108.351	-108.338	-108.338	-108.312	0
	2.7	-0.129624	0.880901	-108.772	-108.38	-108.351	-108.351	-108.337	-108.337	-108.312	0
	2.69	-0.128915	0.882623	-108.772	-108.38	-108.351	-108.351	-108.337	-108.337	-108.311	0
	2.68	-0.128194	0.884404	-108.771	-108.381	-108.351	-108.351	-108.337	-108.337	-108.311	0
	2.67	-0.127462	0.886242	-108.771	-108.381	-108.351	-108.351	-108.337	-108.337	-108.31	0
	2.66	-0.126719	0.888139	-108.771	-108.382	-108.351	-108.351	-108.336	-108.336	-108.309	0
	2.65	-0.125964	0.890095	-108.771	-108.382	-108.351	-108.351	-108.336	-108.336	-108.309	0
	2.64	-0.125197	0.892109	-108.771	-108.383	-108.351	-108.351	-108.336	-108.336	-108.308	0
	2.63	-0.124418	0.894182	-108.77	-108.383	-108.352	-108.352	-108.335	-108.335	-108.308	0
	2.62	-0.123626	0.896315	-108.77	-108.384	-108.352	-108.352	-108.335	-108.335	-108.307	0
	2.61	-0.122822	0.898506	-108.77	-108.384	-108.352	-108.352	-108.335	-108.335	-108.306	0
	2.6	-0.122005	0.900756	-108.77	-108.385	-108.352	-108.352	-108.334	-108.334	-108.306	0
	2.59	-0.121174	0.903066	-108.769	-108.385	-108.352	-108.352	-108.334	-108.334	-108.305	0
	2.58	-0.120331	0.905434	-108.769	-108.386	-108.352	-108.352	-108.334	-108.334	-108.304	0
	2.57	-0.119474	0.90786	-108.769	-108.386	-108.352	-108.352	-108.333	-108.333	-108.303	0
	2.56	-0.118602	0.910346	-108.768	-108.387	-108.352	-108.352	-108.333	-108.333	-108.303	0
	2.55	-0.117717	0.912889	-108.768	-108.388	-108.352	-108.352	-108.333	-108.333	-108.302	0
	2.54	-0.116818	0.91549	-108.768	-108.388	-108.352	-108.352	-108.332	-108.332	-108.301	0
	2.53	-0.115903	0.91656	-108.767	-108.389	-108.352	-108.352	-108.332	-108.332	-108.301	0
	2.52	-0.114974	0.916333	-108.767	-108.389	-108.352	-108.352	-108.331	-108.331	-108.3	0
	2.51	-0.114029	0.916115	-108.767	-108.39	-108.351	-108.351	-108.331	-108.331	-108.299	0
	2.5	-0.113069	0.915907	-108.766	-108.39	-108.351	-108.351	-108.33	-108.33	-108.298	0
	2.49	-0.112092	0.915709	-108.766	-108.391	-108.351	-108.351	-108.33	-108.33	-108.297	0
	2.48	-0.1111	0.915521	-108.766	-108.391	-108.351	-108.351	-108.329	-108.329	-108.297	0
	2.47	-0.11009	0.915344	-108.765	-108.392	-108.351	-108.351	-108.329	-108.329	-108.296	0
	2.46	-0.109064	0.915177	-108.765	-108.393	-108.351	-108.351	-108.328	-108.328	-108.295	0
	2.45	-0.108021	0.915022	-108.764	-108.393	-108.351	-108.351	-108.328	-108.328	-108.294	0
	2.44	-0.106959	0.914878	-108.764	-108.394	-108.351	-108.351	-108.327	-108.327	-108.293	0
	2.43	-0.10588	0.914745	-108.763	-108.394	-108.351	-108.351	-108.327	-108.327	-108.292	0
	2.42	-0.104782	0.914625	-108.763	-108.395	-108.351	-108.351	-108.326	-108.326	-108.291	0
	2.41	-0.103666	0.914516	-108.762	-108.396	-108.351	-108.351	-108.325	-108.325	-108.29	0
	2.4	-0.10253	0.914421	-108.762	-108.396	-108.351	-108.351	-108.325	-108.325	-108.289	0
	2.39	-0.101374	0.914338	-108.761	-108.397	-108.351	-108.351	-108.324	-108.324	-108.288	0
	2.38	-0.100198	0.914268	-108.761	-108.397	-108.35	-108.35	-108.323	-108.323	-108.287	0
	2.37	-0.099002	0.914211	-108.76	-108.398	-108.35	-108.35	-108.323	-108.323	-108.286	0
	2.36	-0.0977842	0.914169	-108.76	-108.399	-108.35	-108.35	-108.322	-108.322	-108.285	0
	2.35	-0.0965454	0.91414	-108.759	-108.399	-108.35	-108.35	-108.321	-108.321	-108.284	0
	2.34	-0.0952847	0.914125	-108.758	-108.4	-108.35	-108.35	-108.32	-108.32	-108.283	0
	2.33	-0.0940015	0.914125	-108.758	-108.4	-108.35	-108.35	-108.319	-108.319	-108.282	0
	2.32	-0.0926953	0.914139	-108.757	-108.401	-108.349	-108.349	-108.319	-108.319	-108.281	0
	2.31	-0.0913657	0.914169	-108.756	-108.402	-108.349	-108.349	-108.318	-108.318	-108.28	0
	2.3	-0.0900121	0.914213	-108.756	-108.402	-108.349	-108.349	-108.317	-108.317	-108.279	0
	2.29	-0.088634	0.914273	-108.755	-108.403	-108.349	-108.349	-108.316	-108.316	-108.278	0
	2.28	-0.0872308	0.914349	-108.754	-108.403	-108.348	-108.348	-108.315	-108.315	-108.277	0
	2.27	-0.0858019	0.914441	-108.753	-108.404	-108.348	-108.348	-108.314	-108.314	-108.275	0
	2.26	-0.0843468	0.914549	-108.753	-108.405	-108.348	-108.348	-108.313	-108.313	-108.274	0
	2.25	-0.0828649	0.914673	-108.752	-108.405	-108.347	-108.347	-108.312	-108.312	-108.273	0
	2.24	-0.0813556	0.914814	-108.751	-108.406	-108.347	-108.347	-108.311	-108.311	-108.272	0
	2.23	-0.0798181	0.914972	-108.75	-108.407	-108.347	-108.347	-108.31	-108.31	-108.27	0
	2.22	-0.078252	0.915147	-108.749	-108.407	-108.346	-108.346	-108.309	-108.309	-108.269	0
	2.21	-0.0766565	0.915339	-108.748	-108.408	-108.346	-108.346	-108.308	-108.308	-108.268	0
	2.2	-0.075031	0.915549	-108.747	-108.408	-108.345	-108.345	-108.306	-108.306	-108.267	0
	2.19	-0.0733747	0.915776	-108.746	-108.409	-108.345	-108.345	-108.305	-108.305	-108.265	0
	2.18	-0.071687	0.916021	-108.745	-108.41	-108.345	-108.345	-108.304	-108.304	-108.264	0
	2.17	-0.0699671	0.916284	-108.744	-108.41	-108.344	-108.344	-108.302	-108.302	-108.262	0
	2.16	-0.0682143	0.916565	-108.743	-108.411	-108.344	-108.344	-108.301	-108.301	-108.261	0
	2.15	-0.0664278	0.916864	-108.741	-108.412	-108.343	-108.343	-108.3	-108.3	-108.26	0
	2.14	-0.0646069	0.917181	-108.74	-108.412	-108.342	-108.342	-108.298	-108.298	-108.258	0
	2.13	-0.0627508	0.917517	-108.739	-108.413	-108.342	-108.342	-108.297	-108.297	-108.257	0
	2.12	-0.0608585	0.917871	-108.738	-108.413	-108.341	-108.341	-108.295	-108.295	-108.255	0
	2.11	-0.0589294	0.918244	-108.736	-108.414	-108.34	-108.34	-108.294	-108.294	-108.254	0
	2.1	-0.0569625	0.918635	-108.735	-108.415	-108.34	-108.34	-108.292	-108.292	-108.252	0
	2.09	-0.054957	0.919045	-108.733	-108.415	-108.339	-108.339	-108.29	-108.29	-108.251	0
	2.08	-0.0529119	0.919474	-108.732	-108.416	-108.338	-108.338	-108.288	-108.288	-108.249	0
	2.07	-0.0508263	0.919921	-108.73	-108.416	-108.337	-108.337	-108.287	-108.287	-108.248	0
	2.06	-0.0486993	0.920386	-108.729	-108.417	-108.337	-108.337	-108.285	-108.285	-108.246	0
	2.05	-0.04653	0.920871	-108.727	-108.417	-108.336	-108.336	-108.283	-108.283	-108.244	0
	2.04	-0.0443173	0.921373	-108.725	-108.418	-108.335	-108.335	-108.281	-108.281	-108.243	0
	2.03	-0.0420601	0.921894	-108.724	-108.419	-108.334	-108.334	-108.279	-108.279	-108.241	0
	2.02	-0.0397576	0.922432	-108.722	-108.419	-108.333	-108.333	-108.277	-108.277	-108.24	0
	2.01	-0.0374085	0.922989	-108.72	-108.42	-108.332	-108.332	-108.275	-108.275	-108.238	0
	2	-0.0350119	0.923564	-108.718	-108.42	-108.331	-108.331	-108.272	-108.272	-108.236	0
	1.99	-0.0325665	0.924155	-108.716	-108.421	-108.33	-108.33	-108.27	-108.27	-108.235	0
	1.98	-0.0300713	0.924764	-108.714	-108.421	-108.328	-108.328	-108.268	-108.268	-108.233	0
	1.97	-0.0275251	0.92539	-108.712	-108.422	-108.327	-108.327	-108.265	-108.265	-108.231	0
	1.96	-0.0249266	0.926033	-108.71	-108.422	-108.326	-108.326	-108.263	-108.263	-108.229	0
	1.95	-0.0222796	0.926689	-108.707	-108.423	-108.325	-108.325	-108.26	-108.26	-108.228	0
	1.94	-0.0195681	0.927366	-108.705	-108.423	-108.323	-108.323	-108.257	-108.257	-108.226	0
	1.93	-0.0168106	0.928053	-108.703	-108.424	-108.322	-108.322	-108.255	-108.255	-108.224	0
	1.92	-0.0139907	0.928757	-108.7	-108.424	-108.32	-108.32	-108.252	-108.252	-108.222	0
	1.91	-0.0111122	0.929475	-108.698	-108.425	-108.319	-108.319	-108.249	-108.249	-108.221	0
	1.9	-0.00817365	0.930207	-108.695	-108.425	-108.317	-108.317	-108.246	-108.246	-108.219	0
	1.89	-0.00517364	0.930951	-108.692	-108.425	-108.315	-108.315	-108.243	-108.243	-108.217	0
	1.88	-0.00211073	0.931708	-108.689	-108.426	-108.313	-108.313	-108.24	-108.24	-108.216	0
	1.87	0.00101654	0.932475	-108.686	-108.426	-108.312	-108.312	-108.236	-108.236	-108.214	0
	1.86	0.00421127	0.931847	-108.683	-108.426	-108.31	-108.31	-108.233	-108.233	-108.212	0
	1.85	0.00747168	0.930804	-108.68	-108.427	-108.308	-108.308	-108.229	-108.229	-108.21	0
	1.84	0.0108018	0.929759	-108.677	-108.427	-108.306	-108.306	-108.226	-108.226	-108.209	0
	1.83	0.0142022	0.928712	-108.674	-108.427	-108.303	-108.303	-108.222	-108.222	-108.207	0
	1.82	0.0176741	0.927663	-108.67	-108.427	-108.301	-108.301	-108.218	-108.218	-108.206	0
	1.81	0.0212203	0.926613	-108.667	-108.428	-108.299	-108.299	-108.214	-108.214	-108.204	0
	1.8	0.0248422	0.925563	-108.663	-108.428	-108.296	-108.296	-108.21	-108.21	-108.202	0
	1.79	0.0285409	0.924514	-108.659	-108.428	-108.294	-108.294	-108.206	-108.206	-108.201	0
	1.78	0.0323182	0.923465	-108.656	-108.428	-108.291	-108.291	-108.202	-108.202	-108.199	0
	1.77	0.0361773	0.922419	-108.652	-108.428	-108.288	-108.288	-108.198	-108.197	-108.197	0
	1.76	0.0401185	0.921376	-108.647	-108.428	-108.285	-108.285	-108.196	-108.193	-108.193	0
	1.75	0.0441428	0.920337	-108.643	-108.428	-108.282	-108.282	-108.195	-108.188	-108.188	0
	1.74	0.0482551	0.919304	-108.639	-108.428	-108.279	-108.279	-108.193	-108.183	-108.183	0
	1.73	0.052453	0.918276	-108.634	-108.428	-108.276	-108.276	-108.192	-108.178	-108.178	0
	1.72	0.0567446	0.917256	-108.629	-108.428	-108.273	-108.273	-108.19	-108.173	-108.173	0
	1.71	0.0611224	0.916244	-108.625	-108.428	-108.269	-108.269	-108.189	-108.168	-108.168	0
	1.7	0.0655977	0.915242	-108.62	-108.428	-108.266	-108.266	-108.187	-108.162	-108.162	0
	1.69	0.0701673	0.914252	-108.614	-108.427	-108.262	-108.262	-108.186	-108.157	-108.157	0
	1.68	0.0748332	0.913274	-108.609	-108.427	-108.258	-108.258	-108.185	-108.151	-108.151	0
	1.67	0.0795968	0.91231	-108.604	-108.427	-108.254	-108.254	-108.183	-108.145	-108.145	0
	1.66	0.0844675	0.911364	-108.598	-108.426	-108.25	-108.25	-108.182	-108.139	-108.139	0
	1.65	0.0894332	0.910433	-108.592	-108.426	-108.245	-108.245	-108.181	-108.133	-108.133	0
	1.64	0.0945075	0.909523	-108.586	-108.425	-108.241	-108.241	-108.18	-108.126	-108.126	0
	1.63	0.0996838	0.908635	-108.58	-108.424	-108.236	-108.236	-108.178	-108.12	-108.12	0
	1.62	0.104971	0.90777	-108.573	-108.424	-108.231	-108.231	-108.177	-108.113	-108.113	0
	1.61	0.110364	0.906932	-108.567	-108.423	-108.226	-108.226	-108.176	-108.106	-108.106	0
	1.6	0.115867	0.90612	-108.56	-108.422	-108.221	-108.221	-108.175	-108.099	-108.099	0
	1.59	0.121483	0.905343	-108.553	-108.421	-108.216	-108.216	-108.174	-108.092	-108.092	0
	1.58	0.127216	0.904597	-108.545	-108.42	-108.21	-108.21	-108.173	-108.085	-108.085	0
	1.57	0.133057	0.90389	-108.538	-108.419	-108.204	-108.204	-108.171	-108.08	-108.08	0
	1.56	0.139015	0.903223	-108.53	-108.418	-108.198	-108.198	-108.17	-108.078	-108.078	0
	1.55	0.145088	0.9026	-108.522	-108.416	-108.192	-108.192	-108.169	-108.078	-108.078	0
	1.54	0.151277	0.902025	-108.514	-108.415	-108.185	-108.185	-108.168	-108.079	-108.079	0
	1.53	0.157582	0.901503	-108.505	-108.413	-108.178	-108.178	-108.167	-108.081	-108.081	0
	1.52	0.164003	0.901037	-108.497	-108.412	-108.171	-108.171	-108.165	-108.083	-108.083	0
	1.51	0.170543	0.900634	-108.488	-108.41	-108.164	-108.164	-108.164	-108.084	-108.084	0
	1.5	0.177192	0.900295	-108.478	-108.408	-108.163	-108.156	-108.156	-108.086	-108.086	0
	1.49	0.183956	0.900029	-108.469	-108.406	-108.161	-108.149	-108.149	-108.088	-108.088	0
	1.48	0.190835	0.899844	-108.459	-108.404	-108.16	-108.14	-108.14	-108.09	-108.09	0
	1.47	0.197823	0.899745	-108.448	-108.401	-108.158	-108.132	-108.132	-108.091	-108.091	0
	1.46	0.204918	0.899736	-108.438	-108.399	-108.157	-108.123	-108.123	-108.093	-108.093	0
	1.45	0.212117	0.899829	-108.427	-108.396	-108.155	-108.114	-108.114	-108.095	-108.095	0
	1.44	0.219418	0.900031	-108.416	-108.393	-108.153	-108.105	-108.105	-108.096	-108.096	0
	1.43	0.226815	0.900353	-108.404	-108.39	-108.151	-108.098	-108.098	-108.095	-108.095	0
	1.42	0.2343	0.900803	-108.392	-108.387	-108.149	-108.1	-108.1	-108.085	-108.085	0
	1.41	0.241869	0.901392	-108.38	-108.384	-108.147	-108.101	-108.101	-108.075	-108.075	0
	1.4	0.249517	0.902134	-108.367	-108.38	-108.145	-108.102	-108.102	-108.064	-108.064	0
	1.39	0.25723	0.90304	-108.354	-108.377	-108.143	-108.104	-108.104	-108.053	-108.053	0
	1.38	0.265003	0.904125	-108.341	-108.372	-108.14	-108.105	-108.105	-108.041	-108.041	0
	1.37	0.272821	0.905403	-108.327	-108.368	-108.138	-108.106	-108.106	-108.029	-108.029	0
	1.36	0.280676	0.906889	-108.313	-108.364	-108.135	-108.107	-108.107	-108.017	-108.017	0
	1.35	0.28855	0.908604	-108.298	-108.359	-108.132	-108.107	-108.107	-108.004	-108.004	0
	1.34	0.296428	0.910565	-108.283	-108.354	-108.129	-108.108	-108.108	-107.991	-107.991	0
	1.33	0.304294	0.912792	-108.268	-108.348	-108.125	-108.108	-108.108	-107.978	-107.978	0
	1.32	0.312129	0.915306	-108.252	-108.343	-108.122	-108.109	-108.109	-107.964	-107.964	0
	1.31	0.319912	0.91813	-108.236	-108.337	-108.118	-108.109	-108.109	-107.949	-107.949	0
	1.3	0.327621	0.921288	-108.219	-108.33	-108.114	-108.109	-108.109	-107.935	-107.935	0
	1.29	0.33523	0.921195	-108.202	-108.324	-108.109	-108.108	-108.108	-107.919	-107.919	0
	1.28	0.34272	0.914865	-108.185	-108.317	-108.108	-108.108	-108.104	-107.904	-107.904	0
	1.27	0.350056	0.908343	-108.167	-108.309	-108.107	-108.107	-108.099	-107.888	-107.888	0
	1.26	0.357218	0.901631	-108.148	-108.301	-108.105	-108.105	-108.094	-107.871	-107.871	0
	1.25	0.364182	0.894729	-108.129	-108.293	-108.104	-108.104	-108.088	-107.855	-107.855	0
	1.24	0.370917	0.887636	-108.11	-108.284	-108.102	-108.102	-108.082	-107.838	-107.838	0
	1.23	0.377404	0.880355	-108.09	-108.275	-108.1	-108.1	-108.075	-107.821	-107.821	0
	1.22	0.383621	0.872887	-108.07	-108.265	-108.097	-108.097	-108.068	-107.804	-107.804	0
	1.21	0.389553	0.865239	-108.05	-108.255	-108.094	-108.094	-108.061	-107.787	-107.787	0
	1.2	0.395196	0.857425	-108.029	-108.244	-108.09	-108.09	-108.053	-107.771	-107.771	0
	1.19	0.40054	0.849456	-108.008	-108.232	-108.086	-108.086	-108.045	-107.755	-107.755	0
	1.18	0.405597	0.84136	-107.986	-108.22	-108.082	-108.082	-108.036	-107.74	-107.74	0
	1.17	0.41037	0.83316	-107.964	-108.207	-108.077	-108.077	-108.026	-107.724	-107.724	0
	1.16	0.414882	0.824889	-107.942	-108.194	-108.071	-108.071	-108.016	-107.709	-107.709	0
	1.15	0.41915	0.816589	-107.919	-108.18	-108.065	-108.065	-108.006	-107.694	-107.694	0
	1.14	0.4232	0.808303	-107.897	-108.165	-108.058	-108.058	-107.994	-107.678	-107.678	0
	1.13	0.427052	0.800074	-107.873	-108.149	-108.05	-108.05	-107.982	-107.661	-107.661	0
	1.12	0.430729	0.791948	-107.85	-108.133	-108.042	-108.042	-107.969	-107.644	-107.644	0
	1.11	0.434247	0.783966	-107.825	-108.116	-108.032	-108.032	-107.956	-107.626	-107.626	0
	1.1	0.437617	0.776165	-107.801	-108.098	-108.022	-108.022	-107.941	-107.608	-107.608	0
	1.09	0.440847	0.768573	-107.776	-108.079	-108.011	-108.011	-107.926	-107.588	-107.588	0
	1.08	0.443937	0.761214	-107.75	-108.059	-107.999	-107.999	-107.91	-107.567	-107.567	0
	1.07	0.446892	0.754104	-107.724	-108.038	-107.986	-107.986	-107.893	-107.545	-107.545	0
	1.06	0.449699	0.747255	-107.697	-108.016	-107.972	-107.972	-107.874	-107.522	-107.522	0
	1.05	0.452364	0.740667	-107.669	-107.992	-107.957	-107.957	-107.855	-107.498	-107.498	0
	1.04	0.454878	0.73434	-107.641	-107.968	-107.94	-107.94	-107.834	-107.472	-107.472	0
	1.03	0.457237	0.728268	-107.611	-107.942	-107.923	-107.923	-107.812	-107.445	-107.445	0
	1.02	0.45944	0.722445	-107.581	-107.915	-107.904	-107.904	-107.789	-107.417	-107.417	0
	1.01	0.461485	0.71686	-107.549	-107.887	-107.884	-107.884	-107.764	-107.387	-107.387	0
	1	0.463372	0.711504	-107.516	-107.862	-107.862	-107.857	-107.738	-107.356	-107.356	0
	0.99	0.465102	0.706364	-107.482	-107.839	-107.839	-107.825	-107.71	-107.322	-107.322	0
	0.98	0.466675	0.701431	-107.447	-107.814	-107.814	-107.791	-107.68	-107.287	-107.287	0
	0.97	0.468097	0.696693	-107.409	-107.788	-107.788	-107.756	-107.649	-107.25	-107.25	0
	0.96	0.46937	0.692142	-107.371	-107.759	-107.759	-107.719	-107.616	-107.212	-107.212	0
	0.95	0.470498	0.687765	-107.33	-107.729	-107.729	-107.68	-107.58	-107.186	-107.171	0
	0.94	0.471486	0.683556	-107.287	-107.697	-107.697	-107.639	-107.543	-107.158	-107.128	0
	0.93	0.472338	0.679506	-107.243	-107.663	-107.663	-107.595	-107.503	-107.127	-107.083	0
	0.92	0.473057	0.675608	-107.196	-107.627	-107.627	-107.55	-107.461	-107.094	-107.036	0
	0.91	0.473648	0.671858	-107.147	-107.588	-107.588	-107.501	-107.417	-107.06	-107.005	0
	0.9	0.474118	0.668246	-107.095	-107.547	-107.547	-107.45	-107.37	-107.023	-106.969	0
	0.89	0.474468	0.664768	-107.041	-107.503	-107.503	-107.397	-107.32	-106.984	-106.93	0
	0.88	0.468087	0.672854	-107.192	-107.484	-107.472	-107.32	-107.28	-106.956	-106.906	0
	0.87	0.468247	0.669428	-107.143	-107.434	-107.423	-107.261	-107.224	-106.912	-106.855	0
	0.86	0.468311	0.6661	-107.091	-107.382	-107.371	-107.198	-107.166	-106.865	-106.808	0
	0.85	0.468284	0.662864	-107.035	-107.326	-107.315	-107.132	-107.104	-106.816	-106.759	0
	0.84	0.468169	0.659718	-106.977	-107.267	-107.257	-107.062	-107.038	-106.762	-106.706	0
	0.83	0.467967	0.656658	-106.915	-107.204	-107.194	-106.989	-106.969	-106.706	-106.65	0
	0.82	0.467677	0.653685	-106.849	-107.138	-107.128	-106.911	-106.895	-106.646	-106.59	0
	0.81	0.467304	0.650793	-106.78	-107.068	-107.058	-106.829	-106.818	-106.582	-106.526	0
	0.8	0.466848	0.647981	-106.706	-106.993	-106.983	-106.743	-106.736	-106.514	-106.458	0
	0.79	0.466315	0.645241	-106.628	-106.914	-106.905	-106.652	-106.649	-106.441	-106.39	0
	0.78	0.465687	0.640346	-106.545	-106.83	-106.821	-106.557	-106.556	-106.364	-106.317	0
	0.77	0.464983	0.633901	-106.457	-106.741	-106.732	-106.46	-106.454	-106.283	-106.24	0
	0.76	0.464196	0.627382	-106.364	-106.647	-106.639	-106.358	-106.347	-106.196	-106.157	0
	0.75	0.463326	0.62079	-106.266	-106.548	-106.539	-106.249	-106.235	-106.103	-106.069	0
	0.74	0.462372	0.614125	-106.161	-106.442	-106.434	-106.135	-106.115	-106.005	-105.976	0
	0.73	0.461335	0.607389	-106.051	-106.33	-106.322	-106.014	-105.99	-105.9	-105.876	0
	0.72	0.460213	0.600582	-105.934	-106.212	-106.204	-105.886	-105.857	-105.789	-105.77	0
	0.71	0.459003	0.593707	-105.81	-106.086	-106.078	-105.751	-105.717	-105.67	-105.657	0
	0.7	0.457703	0.586764	-105.678	-105.953	-105.945	-105.608	-105.569	-105.544	-105.536	0
	0.69	0.456314	0.579756	-105.539	-105.812	-105.805	-105.458	-105.413	-105.41	-105.408	0
	0.68	0.454834	0.572683	-105.391	-105.663	-105.655	-105.3	-105.271	-105.27	-105.267	0
	0.67	0.453264	0.565548	-105.235	-105.505	-105.497	-105.136	-105.126	-105.124	-105.11	0
	0.66	0.451595	0.558351	-105.07	-105.338	-105.33	-104.971	-104.97	-104.969	-104.938	0
	0.65	0.449819	0.551094	-104.894	-105.16	-105.153	-104.807	-104.804	-104.798	-104.749	0
	0.64	0.438941	0.548555	-104.739	-104.975	-104.971	-104.672	-104.635	-104.612	-104.6	0
	0.63	0.445979	0.536411	-104.511	-104.773	-104.766	-104.445	-104.442	-104.425	-104.388	0
	0.62	0.443904	0.528987	-104.302	-104.563	-104.555	-104.247	-104.244	-104.222	-104.19	0
	0.61	0.441703	0.521508	-104.081	-104.339	-104.332	-104.036	-104.033	-104.006	-103.979	0
	0.6	0.409609	0.540007	-103.897	-104.105	-104.1	-103.852	-103.815	-103.792	-103.78	0
	0.59	0.436947	0.506396	-103.598	-103.852	-103.844	-103.574	-103.57	-103.518	-103.518	0
	0.58	0.394708	0.535149	-103.395	-103.589	-103.584	-103.361	-103.325	-103.301	-103.288	0
	0.57	0.431742	0.491086	-103.056	-103.305	-103.297	-103.053	-103.048	-102.996	-102.996	0
	0.56	0.379661	0.527748	-102.829	-103.01	-103.004	-102.807	-102.771	-102.746	-102.734	0
	0.55	0.372083	0.520097	-102.521	-102.695	-102.688	-102.504	-102.468	-102.443	-102.431	0
	0.54	0.36447	0.512428	-102.194	-102.361	-102.354	-102.183	-102.147	-102.121	-102.109	0
	0.53	0.356821	0.504738	-101.847	-102.008	-102	-101.842	-101.807	-101.78	-101.767	0
	0.52	0.349136	0.497029	-101.48	-101.634	-101.626	-101.48	-101.446	-101.418	-101.406	0
	0.51	0.341416	0.489302	-101.092	-101.24	-101.23	-101.098	-101.063	-101.034	-101.022	0
	0.5	0.333664	0.481555	-100.681	-100.822	-100.811	-100.692	-100.658	-100.635	-100.628	0

## Sheet: 1SF-1IP Data 
				CAS													1x												S													Graphing Energy Levels (Relative)
		LUMO	HOMO	ROHF	R0	R1	R2	R3	R4	R5	R6	R7	R8	R9	R10	R11	R0	R1	R2	R3	R4	R5	R6	R7	R8	R9	R10	R11	R0	R1	R2	R3	R4	R5	R6	R7	R8	R9	R10	R11			CAS
	4	-0.169242	0.925608	-108.777	-108.217	-108.215	-108.215	-108.214	-108.214	-108.212	-108.144	-108.144	-108.144	-108.144	-108.143	-108.143	-108.256	-108.254	-108.254	-108.254	-108.254	-108.252	-108.173	-108.173	-108.173	-108.173	-108.173	-108.173	-108.348	-108.346	-108.346	-108.345	-108.345	-108.343	-108.264	-108.264	-108.264	-108.264	-108.264	-108.264			ROHF	R0	R1	R2	R3	R4	R5
	3.95	-0.168755	0.921937	-108.777	-108.217	-108.215	-108.215	-108.214	-108.214	-108.212	-108.144	-108.144	-108.144	-108.144	-108.143	-108.143	-108.256	-108.254	-108.254	-108.254	-108.254	-108.251	-108.173	-108.173	-108.173	-108.173	-108.173	-108.173	-108.348	-108.346	-108.346	-108.345	-108.345	-108.343	-108.264	-108.264	-108.264	-108.264	-108.264	-108.264		4	-0.560223	0	0.00187485	0.00187485	0.00231553	0.00231553	0.00416626
	3.9	-0.168226	0.918033	-108.777	-108.217	-108.215	-108.215	-108.214	-108.214	-108.212	-108.144	-108.144	-108.144	-108.144	-108.143	-108.143	-108.257	-108.254	-108.254	-108.254	-108.254	-108.251	-108.174	-108.174	-108.173	-108.173	-108.173	-108.173	-108.348	-108.346	-108.346	-108.345	-108.345	-108.343	-108.265	-108.265	-108.264	-108.264	-108.264	-108.264		3.95	-0.560224	-0.000239115	0.00183048	0.00183048	0.0023317	0.0023317	0.00437435
	3.85	-0.167653	0.913908	-108.777	-108.217	-108.215	-108.215	-108.214	-108.214	-108.212	-108.144	-108.144	-108.144	-108.144	-108.143	-108.143	-108.257	-108.254	-108.254	-108.254	-108.254	-108.251	-108.174	-108.174	-108.173	-108.173	-108.173	-108.173	-108.349	-108.346	-108.346	-108.345	-108.345	-108.343	-108.265	-108.265	-108.264	-108.264	-108.264	-108.264		3.9	-0.560223	-0.000500737	0.00178012	0.00178012	0.00234936	0.00234936	0.00460087
	3.8	-0.167032	0.90958	-108.777	-108.218	-108.215	-108.215	-108.214	-108.214	-108.212	-108.144	-108.144	-108.144	-108.144	-108.143	-108.143	-108.257	-108.254	-108.254	-108.254	-108.254	-108.251	-108.174	-108.174	-108.173	-108.173	-108.173	-108.173	-108.349	-108.346	-108.346	-108.345	-108.345	-108.342	-108.265	-108.265	-108.264	-108.264	-108.264	-108.264		3.85	-0.560222	-0.000786715	0.00172297	0.00172297	0.00236856	0.00236856	0.00484729
	3.75	-0.16636	0.905073	-108.777	-108.218	-108.215	-108.215	-108.214	-108.214	-108.211	-108.144	-108.144	-108.144	-108.144	-108.143	-108.143	-108.258	-108.255	-108.255	-108.254	-108.254	-108.25	-108.174	-108.174	-108.173	-108.173	-108.173	-108.173	-108.349	-108.346	-108.346	-108.345	-108.345	-108.342	-108.265	-108.265	-108.264	-108.264	-108.264	-108.264		3.8	-0.560218	-0.00109899	0.00165815	0.00165815	0.00238935	0.00238935	0.0051153
	3.7	-0.165634	0.900418	-108.777	-108.218	-108.215	-108.215	-108.214	-108.214	-108.211	-108.144	-108.144	-108.144	-108.144	-108.144	-108.144	-108.258	-108.255	-108.255	-108.254	-108.254	-108.25	-108.175	-108.175	-108.174	-108.173	-108.173	-108.173	-108.35	-108.346	-108.346	-108.345	-108.345	-108.342	-108.266	-108.266	-108.265	-108.264	-108.264	-108.264		3.75	-0.560211	-0.00143964	0.00158469	0.00158469	0.00241179	0.00241179	0.00540671
	3.65	-0.164848	0.895653	-108.777	-108.219	-108.215	-108.215	-108.214	-108.214	-108.211	-108.144	-108.144	-108.144	-108.144	-108.144	-108.144	-108.259	-108.255	-108.255	-108.254	-108.254	-108.25	-108.175	-108.175	-108.174	-108.174	-108.174	-108.173	-108.35	-108.346	-108.346	-108.345	-108.345	-108.342	-108.266	-108.266	-108.265	-108.265	-108.265	-108.264		3.7	-0.560202	-0.00181085	0.00150145	0.00150145	0.00243592	0.00243592	0.00572349
	3.6	-0.163998	0.890824	-108.777	-108.219	-108.215	-108.215	-108.214	-108.214	-108.21	-108.145	-108.145	-108.145	-108.145	-108.144	-108.144	-108.259	-108.255	-108.255	-108.254	-108.254	-108.25	-108.175	-108.175	-108.174	-108.174	-108.174	-108.173	-108.351	-108.347	-108.347	-108.345	-108.345	-108.341	-108.266	-108.266	-108.265	-108.265	-108.265	-108.264		3.65	-0.560187	-0.00221496	0.00140715	0.00140715	0.00246173	0.00246173	0.00606778
	3.55	-0.163081	0.885986	-108.777	-108.22	-108.215	-108.215	-108.214	-108.214	-108.21	-108.145	-108.145	-108.145	-108.145	-108.144	-108.144	-108.26	-108.255	-108.255	-108.254	-108.254	-108.249	-108.176	-108.176	-108.174	-108.174	-108.174	-108.173	-108.352	-108.347	-108.347	-108.345	-108.345	-108.341	-108.267	-108.267	-108.265	-108.265	-108.265	-108.264		3.6	-0.560168	-0.00265441	0.00130032	0.00130032	0.0024892	0.0024892	0.00644184
	3.5	-0.162089	0.8812	-108.777	-108.22	-108.216	-108.216	-108.214	-108.214	-108.209	-108.145	-108.145	-108.145	-108.145	-108.144	-108.144	-108.261	-108.255	-108.255	-108.254	-108.254	-108.249	-108.176	-108.176	-108.174	-108.174	-108.174	-108.174	-108.352	-108.347	-108.347	-108.345	-108.345	-108.341	-108.267	-108.267	-108.265	-108.265	-108.265	-108.265		3.55	-0.560141	-0.00313178	0.00117927	0.00117927	0.00251823	0.00251823	0.00684806
	3.45	-0.161017	0.876532	-108.777	-108.221	-108.216	-108.216	-108.214	-108.214	-108.209	-108.145	-108.145	-108.145	-108.145	-108.144	-108.144	-108.261	-108.256	-108.256	-108.254	-108.254	-108.249	-108.177	-108.177	-108.175	-108.175	-108.174	-108.174	-108.353	-108.347	-108.347	-108.345	-108.345	-108.34	-108.268	-108.268	-108.266	-108.266	-108.265	-108.265		3.5	-0.560106	-0.00364979	0.00104205	0.00104205	0.00254865	0.00254865	0.0072889
	3.4	-0.159859	0.872064	-108.777	-108.221	-108.216	-108.216	-108.214	-108.214	-108.208	-108.146	-108.146	-108.146	-108.146	-108.144	-108.144	-108.262	-108.256	-108.256	-108.254	-108.254	-108.248	-108.178	-108.178	-108.175	-108.175	-108.175	-108.175	-108.354	-108.348	-108.348	-108.346	-108.346	-108.34	-108.268	-108.268	-108.266	-108.266	-108.266	-108.266		3.45	-0.56006	-0.00421055	0.000886626	0.000886626	0.00258043	0.00258043	0.00776741
	3.35	-0.158608	0.867874	-108.777	-108.222	-108.216	-108.216	-108.214	-108.214	-108.208	-108.146	-108.146	-108.146	-108.146	-108.144	-108.144	-108.263	-108.256	-108.256	-108.254	-108.254	-108.248	-108.178	-108.178	-108.176	-108.176	-108.175	-108.175	-108.354	-108.348	-108.348	-108.346	-108.346	-108.339	-108.269	-108.269	-108.266	-108.266	-108.266	-108.266		3.4	-0.560002	-0.00481815	0.000710117	0.000710117	0.00261291	0.00261291	0.00828506
	3.3	-0.157256	0.864052	-108.776	-108.223	-108.216	-108.216	-108.214	-108.214	-108.207	-108.147	-108.147	-108.147	-108.147	-108.145	-108.145	-108.264	-108.257	-108.257	-108.254	-108.254	-108.247	-108.179	-108.179	-108.176	-108.176	-108.175	-108.175	-108.355	-108.348	-108.348	-108.346	-108.346	-108.339	-108.27	-108.27	-108.267	-108.267	-108.266	-108.266		3.35	-0.559929	-0.00547503	0.000509714	0.000509714	0.00264578	0.00264578	0.00884463
	3.25	-0.155796	0.860688	-108.776	-108.224	-108.217	-108.217	-108.214	-108.214	-108.207	-108.147	-108.147	-108.147	-108.147	-108.145	-108.145	-108.265	-108.257	-108.257	-108.254	-108.254	-108.247	-108.18	-108.18	-108.177	-108.177	-108.176	-108.176	-108.356	-108.349	-108.349	-108.346	-108.346	-108.339	-108.271	-108.271	-108.267	-108.267	-108.267	-108.267		3.3	-0.559838	-0.00618418	0.000282094	0.000282094	0.00267849	0.00267849	0.00944826
	3.2	-0.154219	0.857878	-108.776	-108.224	-108.217	-108.217	-108.214	-108.214	-108.206	-108.148	-108.148	-108.148	-108.148	-108.145	-108.145	-108.266	-108.257	-108.257	-108.254	-108.254	-108.246	-108.181	-108.181	-108.177	-108.177	-108.176	-108.176	-108.357	-108.349	-108.349	-108.346	-108.346	-108.338	-108.272	-108.272	-108.268	-108.268	-108.267	-108.267		3.25	-0.559725	-0.00694859	2.34697e-05	2.34697e-05	0.00271038	0.00271038	0.0100977
	3.15	-0.152516	0.85572	-108.776	-108.225	-108.217	-108.217	-108.214	-108.214	-108.205	-108.149	-108.149	-108.149	-108.149	-108.146	-108.146	-108.267	-108.258	-108.258	-108.254	-108.254	-108.246	-108.182	-108.182	-108.182	-108.182	-108.178	-108.178	-108.359	-108.349	-108.349	-108.346	-108.346	-108.338	-108.273	-108.273	-108.273	-108.273	-108.269	-108.269		3.2	-0.559586	-0.00777125	-0.000270446	-0.000270446	0.00274065	0.00274065	0.0107943
	3.1	-0.150678	0.85431	-108.776	-108.226	-108.218	-108.218	-108.214	-108.214	-108.204	-108.15	-108.15	-108.149	-108.149	-108.146	-108.146	-108.268	-108.258	-108.258	-108.255	-108.255	-108.245	-108.184	-108.184	-108.183	-108.183	-108.179	-108.179	-108.36	-108.35	-108.35	-108.346	-108.346	-108.337	-108.274	-108.274	-108.274	-108.274	-108.27	-108.27		3.15	-0.559417	-0.00865502	-0.000604484	-0.000604484	0.00276839	0.00276839	0.0115386
	3.05	-0.148695	0.85374	-108.776	-108.227	-108.218	-108.218	-108.214	-108.214	-108.203	-108.15	-108.15	-108.15	-108.15	-108.147	-108.147	-108.27	-108.259	-108.259	-108.255	-108.255	-108.245	-108.185	-108.185	-108.185	-108.185	-108.18	-108.18	-108.361	-108.351	-108.351	-108.346	-108.346	-108.337	-108.276	-108.276	-108.275	-108.275	-108.27	-108.27		3.1	-0.559211	-0.00960269	-0.00098407	-0.00098407	0.00279255	0.00279255	0.0123305
	3	-0.146553	0.854116	-108.775	-108.228	-108.219	-108.219	-108.214	-108.214	-108.203	-108.151	-108.151	-108.151	-108.151	-108.147	-108.147	-108.271	-108.26	-108.26	-108.255	-108.255	-108.244	-108.187	-108.187	-108.186	-108.186	-108.181	-108.181	-108.363	-108.351	-108.351	-108.346	-108.346	-108.336	-108.277	-108.277	-108.277	-108.277	-108.272	-108.272		3.05	-0.558963	-0.0106157	-0.00141473	-0.00141473	0.00281261	0.00281261	0.0131696
	2.95	-0.14424	0.855526	-108.775	-108.229	-108.219	-108.219	-108.214	-108.214	-108.202	-108.153	-108.153	-108.152	-108.152	-108.148	-108.148	-108.273	-108.26	-108.26	-108.255	-108.255	-108.244	-108.188	-108.188	-108.188	-108.188	-108.182	-108.182	-108.364	-108.352	-108.352	-108.347	-108.347	-108.336	-108.279	-108.279	-108.278	-108.278	-108.273	-108.273		3	-0.558664	-0.0116984	-0.00190419	-0.00190419	0.00282628	0.00282628	0.014052
	2.9	-0.141745	0.858055	-108.775	-108.231	-108.22	-108.22	-108.214	-108.214	-108.201	-108.154	-108.154	-108.153	-108.153	-108.149	-108.149	-108.274	-108.261	-108.261	-108.255	-108.255	-108.243	-108.19	-108.19	-108.189	-108.189	-108.184	-108.184	-108.366	-108.353	-108.353	-108.347	-108.347	-108.335	-108.281	-108.281	-108.28	-108.28	-108.274	-108.274		2.95	-0.558306	-0.012852	-0.00245956	-0.00245956	0.00283275	0.00283275	0.0149747
	2.85	-0.139053	0.861787	-108.774	-108.232	-108.22	-108.22	-108.214	-108.214	-108.2	-108.155	-108.155	-108.155	-108.155	-108.149	-108.149	-108.276	-108.262	-108.262	-108.255	-108.255	-108.243	-108.192	-108.192	-108.191	-108.191	-108.185	-108.185	-108.368	-108.354	-108.354	-108.347	-108.347	-108.335	-108.283	-108.283	-108.282	-108.282	-108.275	-108.275		2.9	-0.557877	-0.0140782	-0.00308922	-0.00308922	0.00283072	0.00283072	0.0159323
	2.8	-0.136147	0.866797	-108.773	-108.233	-108.221	-108.221	-108.214	-108.214	-108.199	-108.157	-108.157	-108.156	-108.156	-108.15	-108.15	-108.278	-108.263	-108.263	-108.256	-108.256	-108.242	-108.194	-108.194	-108.193	-108.193	-108.187	-108.187	-108.369	-108.355	-108.355	-108.347	-108.347	-108.334	-108.285	-108.285	-108.284	-108.284	-108.277	-108.277		2.85	-0.557365	-0.0153784	-0.00380242	-0.00380242	0.00281889	0.00281889	0.016918
	2.75	-0.13301	0.873149	-108.773	-108.235	-108.222	-108.222	-108.214	-108.214	-108.198	-108.158	-108.158	-108.157	-108.157	-108.151	-108.151	-108.28	-108.264	-108.264	-108.256	-108.256	-108.242	-108.196	-108.196	-108.195	-108.195	-108.188	-108.188	-108.371	-108.356	-108.356	-108.347	-108.347	-108.334	-108.287	-108.287	-108.286	-108.286	-108.278	-108.278		2.8	-0.556755	-0.0167536	-0.0046094	-0.0046094	0.00279609	0.00279609	0.0179232
	2.7	-0.129626	0.880897	-108.772	-108.236	-108.223	-108.223	-108.214	-108.214	-108.197	-108.16	-108.16	-108.159	-108.159	-108.152	-108.152	-108.282	-108.266	-108.266	-108.256	-108.256	-108.242	-108.199	-108.199	-108.197	-108.197	-108.19	-108.19	-108.374	-108.357	-108.357	-108.348	-108.348	-108.334	-108.289	-108.289	-108.288	-108.288	-108.28	-108.28		2.75	-0.556029	-0.0182046	-0.0055214	-0.0055214	0.00276134	0.00276134	0.0189378
	2.65	-0.125965	0.89009	-108.771	-108.238	-108.224	-108.224	-108.214	-108.214	-108.196	-108.162	-108.162	-108.16	-108.16	-108.154	-108.154	-108.284	-108.267	-108.267	-108.257	-108.257	-108.242	-108.201	-108.201	-108.2	-108.2	-108.191	-108.191	-108.376	-108.358	-108.358	-108.348	-108.348	-108.334	-108.292	-108.292	-108.29	-108.29	-108.282	-108.282		2.7	-0.555165	-0.0197317	-0.00655071	-0.00655071	0.00271413	0.00271413	0.0199507
	2.6	-0.122006	0.900751	-108.77	-108.24	-108.226	-108.226	-108.214	-108.214	-108.195	-108.164	-108.164	-108.162	-108.162	-108.155	-108.155	-108.287	-108.269	-108.269	-108.257	-108.257	-108.242	-108.204	-108.204	-108.202	-108.202	-108.193	-108.193	-108.378	-108.36	-108.36	-108.348	-108.348	-108.333	-108.294	-108.294	-108.292	-108.292	-108.283	-108.283		2.65	-0.554138	-0.0213348	-0.00771078	-0.00771078	0.00265432	0.00265432	0.0209504
	2.55	-0.117719	0.912883	-108.768	-108.241	-108.227	-108.227	-108.214	-108.214	-108.194	-108.166	-108.166	-108.163	-108.163	-108.156	-108.156	-108.289	-108.27	-108.27	-108.258	-108.258	-108.242	-108.207	-108.207	-108.204	-108.204	-108.195	-108.195	-108.381	-108.362	-108.362	-108.349	-108.349	-108.334	-108.297	-108.297	-108.295	-108.295	-108.285	-108.285		2.6	-0.552919	-0.0230135	-0.00901578	-0.00901578	0.00258312	0.00258312	0.0219254
	2.5	-0.11307	0.915907	-108.766	-108.243	-108.229	-108.229	-108.214	-108.214	-108.193	-108.168	-108.168	-108.165	-108.165	-108.157	-108.157	-108.292	-108.272	-108.272	-108.258	-108.258	-108.242	-108.21	-108.21	-108.207	-108.207	-108.196	-108.196	-108.384	-108.363	-108.363	-108.349	-108.349	-108.334	-108.3	-108.3	-108.297	-108.297	-108.286	-108.286		2.55	-0.551471	-0.024767	-0.0104807	-0.0104807	0.00250309	0.00250309	0.0228656
	2.45	-0.108022	0.915022	-108.764	-108.245	-108.231	-108.231	-108.214	-108.214	-108.192	-108.17	-108.17	-108.167	-108.167	-108.158	-108.158	-108.295	-108.275	-108.275	-108.259	-108.259	-108.242	-108.213	-108.213	-108.21	-108.21	-108.198	-108.198	-108.386	-108.366	-108.366	-108.35	-108.35	-108.334	-108.303	-108.303	-108.3	-108.3	-108.288	-108.288		2.5	-0.549753	-0.0265945	-0.0121211	-0.0121211	0.00241897	0.00241897	0.0237635
	2.4	-0.102531	0.914421	-108.762	-108.247	-108.233	-108.233	-108.214	-108.214	-108.191	-108.173	-108.173	-108.168	-108.168	-108.158	-108.158	-108.298	-108.277	-108.277	-108.259	-108.259	-108.243	-108.216	-108.216	-108.212	-108.212	-108.199	-108.199	-108.389	-108.368	-108.368	-108.35	-108.35	-108.334	-108.307	-108.307	-108.303	-108.303	-108.289	-108.289		2.45	-0.547715	-0.0284947	-0.0139521	-0.0139521	0.00233868	0.00233868	0.024616
	2.35	-0.0965474	0.914139	-108.759	-108.249	-108.235	-108.235	-108.214	-108.214	-108.19	-108.175	-108.175	-108.17	-108.17	-108.159	-108.159	-108.301	-108.28	-108.28	-108.26	-108.26	-108.244	-108.22	-108.22	-108.215	-108.215	-108.2	-108.2	-108.393	-108.37	-108.37	-108.35	-108.35	-108.335	-108.31	-108.31	-108.306	-108.306	-108.29	-108.29		2.4	-0.5453	-0.0304661	-0.0159884	-0.0159884	0.00227444	0.00227444	0.025425
	2.3	-0.0900142	0.914213	-108.756	-108.251	-108.237	-108.237	-108.214	-108.214	-108.19	-108.178	-108.178	-108.172	-108.172	-108.16	-108.159	-108.304	-108.282	-108.282	-108.26	-108.26	-108.244	-108.224	-108.224	-108.218	-108.218	-108.201	-108.201	-108.396	-108.373	-108.373	-108.351	-108.351	-108.336	-108.314	-108.314	-108.308	-108.308	-108.291	-108.291		2.35	-0.54244	-0.0325071	-0.0182425	-0.0182425	0.00224439	0.00224439	0.0261994
	2.25	-0.0828671	0.914673	-108.752	-108.253	-108.24	-108.24	-108.214	-108.214	-108.189	-108.181	-108.181	-108.173	-108.173	-108.161	-108.159	-108.308	-108.286	-108.286	-108.261	-108.261	-108.245	-108.228	-108.228	-108.221	-108.221	-108.201	-108.201	-108.399	-108.376	-108.376	-108.351	-108.351	-108.336	-108.318	-108.318	-108.311	-108.311	-108.292	-108.292		2.3	-0.539055	-0.0346158	-0.0207238	-0.0207238	0.00227429	0.00227429	0.0269557
	2.2	-0.0750332	0.915548	-108.747	-108.256	-108.243	-108.243	-108.214	-108.214	-108.188	-108.183	-108.183	-108.175	-108.175	-108.163	-108.158	-108.312	-108.289	-108.289	-108.261	-108.261	-108.246	-108.232	-108.232	-108.224	-108.224	-108.205	-108.202	-108.403	-108.379	-108.379	-108.351	-108.351	-108.337	-108.322	-108.322	-108.314	-108.314	-108.293	-108.292		2.25	-0.535055	-0.0367905	-0.0234374	-0.0234374	0.00239968	0.00239968	0.0277187
	2.15	-0.0664302	0.916863	-108.741	-108.258	-108.246	-108.246	-108.213	-108.213	-108.187	-108.186	-108.186	-108.176	-108.176	-108.165	-108.157	-108.316	-108.293	-108.293	-108.262	-108.262	-108.248	-108.236	-108.236	-108.227	-108.227	-108.207	-108.201	-108.407	-108.382	-108.382	-108.351	-108.351	-108.338	-108.326	-108.326	-108.317	-108.317	-108.295	-108.292		2.2	-0.530333	-0.0390292	-0.0263823	-0.0263823	0.00266806	0.00266806	0.0285215
	2.1	-0.056965	0.918635	-108.735	-108.26	-108.25	-108.25	-108.213	-108.213	-108.186	-108.19	-108.19	-108.177	-108.177	-108.166	-108.155	-108.32	-108.296	-108.296	-108.262	-108.262	-108.249	-108.241	-108.241	-108.23	-108.23	-108.209	-108.201	-108.411	-108.386	-108.386	-108.351	-108.351	-108.339	-108.331	-108.331	-108.32	-108.32	-108.297	-108.291		2.15	-0.524765	-0.0413302	-0.0295498	-0.0295498	0.00314136	0.00314136	0.0294066
	2.05	-0.0465325	0.92087	-108.727	-108.263	-108.253	-108.253	-108.212	-108.212	-108.185	-108.193	-108.193	-108.178	-108.178	-108.167	-108.153	-108.324	-108.301	-108.301	-108.261	-108.261	-108.25	-108.246	-108.246	-108.232	-108.232	-108.211	-108.199	-108.415	-108.39	-108.39	-108.351	-108.351	-108.34	-108.336	-108.336	-108.322	-108.322	-108.298	-108.29		2.1	-0.518208	-0.0436916	-0.0329219	-0.0329219	0.00389837	0.00389837	0.0304255
	2	-0.0350148	0.923562	-108.718	-108.265	-108.257	-108.257	-108.21	-108.21	-108.184	-108.196	-108.196	-108.179	-108.179	-108.168	-108.149	-108.328	-108.305	-108.305	-108.261	-108.261	-108.251	-108.251	-108.251	-108.235	-108.235	-108.213	-108.198	-108.419	-108.394	-108.394	-108.35	-108.35	-108.34	-108.341	-108.341	-108.325	-108.325	-108.3	-108.288		2.05	-0.510497	-0.0461119	-0.0364701	-0.0364701	0.00503732	0.00503732	0.0316395
	1.95	-0.0222779	0.92669	-108.707	-108.268	-108.261	-108.261	-108.208	-108.208	-108.182	-108.199	-108.199	-108.179	-108.179	-108.169	-108.145	-108.333	-108.31	-108.31	-108.26	-108.26	-108.252	-108.256	-108.256	-108.237	-108.237	-108.215	-108.195	-108.424	-108.398	-108.398	-108.348	-108.348	-108.341	-108.346	-108.346	-108.327	-108.327	-108.302	-108.285		2	-0.501436	-0.048589	-0.0401532	-0.0401532	0.00667877	0.00667877	0.0331212
	1.9	-0.00817161	0.930207	-108.695	-108.27	-108.264	-108.264	-108.205	-108.205	-108.179	-108.203	-108.203	-108.179	-108.179	-108.17	-108.14	-108.338	-108.314	-108.314	-108.258	-108.258	-108.253	-108.262	-108.262	-108.239	-108.239	-108.218	-108.191	-108.428	-108.403	-108.403	-108.351	-108.351	-108.341	-108.346	-108.346	-108.329	-108.329	-108.317	-108.304		1.95	-0.490801	-0.051121	-0.0439172	-0.0439172	0.00896753	0.00896753	0.0349555
	1.85	0.0074725	0.930804	-108.68	-108.273	-108.268	-108.268	-108.207	-108.207	-108.177	-108.2	-108.2	-108.178	-108.178	-108.17	-108.133	-108.343	-108.319	-108.319	-108.255	-108.255	-108.254	-108.268	-108.268	-108.241	-108.241	-108.221	-108.186	-108.433	-108.407	-108.407	-108.357	-108.357	-108.341	-108.343	-108.343	-108.33	-108.33	-108.306	-108.276		1.9	-0.478325	-0.0537044	-0.0476925	-0.0476925	0.0120767	0.0120767	0.0372422
	1.8	0.0248414	0.925562	-108.663	-108.276	-108.272	-108.272	-108.21	-108.21	-108.173	-108.195	-108.195	-108.176	-108.176	-108.171	-108.124	-108.348	-108.324	-108.324	-108.251	-108.251	-108.254	-108.274	-108.274	-108.242	-108.242	-108.225	-108.205	-108.438	-108.412	-108.412	-108.363	-108.363	-108.341	-108.339	-108.339	-108.331	-108.331	-108.308	-108.296		1.85	-0.463697	-0.0563342	-0.0513939	-0.0513939	0.0100082	0.0100082	0.0400984
	1.75	0.0441496	0.920337	-108.643	-108.278	-108.275	-108.275	-108.214	-108.214	-108.169	-108.188	-108.188	-108.174	-108.174	-108.172	-108.114	-108.354	-108.329	-108.329	-108.246	-108.246	-108.254	-108.28	-108.28	-108.242	-108.242	-108.23	-108.175	-108.443	-108.416	-108.416	-108.369	-108.369	-108.34	-108.333	-108.333	-108.331	-108.331	-108.312	-108.25		1.8	-0.446554	-0.0590033	-0.0549197	-0.0549197	0.0063374	0.0063374	0.0436613
	1.7	0.0655989	0.915242	-108.62	-108.281	-108.278	-108.278	-108.218	-108.218	-108.163	-108.179	-108.179	-108.17	-108.17	-108.173	-108.106	-108.359	-108.334	-108.334	-108.241	-108.241	-108.253	-108.287	-108.287	-108.24	-108.24	-108.236	-108.172	-108.448	-108.421	-108.421	-108.376	-108.376	-108.338	-108.33	-108.33	-108.326	-108.326	-108.316			1.75	-0.42647	-0.0616999	-0.0581507	-0.0581507	0.00261787	0.00261787	0.0480923
	1.65	0.089434	0.910433	-108.592	-108.284	-108.28	-108.28	-108.221	-108.221	-108.156	-108.168	-108.168	-108.166	-108.166	-108.175	-108.1	-108.365	-108.338	-108.338	-108.239	-108.239	-108.251	-108.294	-108.294	-108.231	-108.231	-108.242	-108.169	-108.453	-108.424	-108.424	-108.382	-108.382	-108.335	-108.328	-108.328	-108.321	-108.317	-108.317			1.7	-0.402949	-0.0644064	-0.06095	-0.06095	-0.00112387	-0.00112387	0.0535813
	1.6	0.115869	0.90612	-108.56	-108.286	-108.281	-108.281	-108.225	-108.225	-108.148	-108.16	-108.16	-108.155	-108.155	-108.177	-108.092	-108.37	-108.342	-108.342	-108.235	-108.235	-108.248	-108.3	-108.3	-108.22	-108.22	-108.249		-108.458	-108.428	-108.428	-108.389	-108.389	-108.331	-108.327	-108.324	-108.324	-108.306	-108.306	-108.238		1.65	-0.375413	-0.067092	-0.0631554	-0.0631554	-0.00484683	-0.00484683	0.060355
	1.55	0.145089	0.902599	-108.522	-108.289	-108.282	-108.282	-108.229	-108.229	-108.138	-108.152	-108.152	-108.138	-108.138	-108.179	-108.083	-108.375	-108.345	-108.345	-108.229	-108.229	-108.244	-108.307	-108.307	-108.207	-108.207	-108.256	-108.158	-108.463	-108.43	-108.43	-108.395	-108.395	-108.325	-108.333	-108.318	-108.318	-108.292	-108.292	-108.231		1.6	-0.343198	-0.0697083	-0.0645765	-0.0645765	-0.00849171	-0.00849171	0.0686842
	1.5	0.177192	0.900295	-108.478	-108.291	-108.281	-108.281	-108.232	-108.232	-108.125	-108.142	-108.142	-108.118	-108.118	-108.181		-108.38	-108.347	-108.347	-108.221	-108.221	-108.239	-108.313	-108.313	-108.19	-108.19	-108.262	-108.15	-108.467	-108.431	-108.431	-108.4	-108.4	-108.318	-108.339	-108.309	-108.309	-108.274	-108.274	-108.222		1.55	-0.305538	-0.0721744	-0.0649805	-0.0649804	-0.0119652	-0.0119652	0.0788988
	1.45	0.212119	0.899831	-108.427	-108.293	-108.278	-108.278	-108.234	-108.234	-108.11	-108.129	-108.129	-108.093	-108.093	-108.183		-108.383	-108.348	-108.348	-108.209	-108.209	-108.232	-108.318	-108.318	-108.17	-108.17	-108.268	-108.139	-108.47	-108.43	-108.43	-108.405	-108.405	-108.31	-108.344	-108.298	-108.298	-108.253	-108.253	-108.211		1.5	-0.261567	-0.0743557	-0.0640748	-0.0640748	-0.0151186	-0.0151186	0.0914077
	1.4	0.249516	0.902133	-108.367	-108.294	-108.273	-108.273	-108.236	-108.236	-108.091	-108.113	-108.113	-108.064	-108.064	-108.184		-108.385	-108.346	-108.346	-108.195	-108.195	-108.226	-108.321	-108.321	-108.146	-108.146	-108.273	-108.127	-108.471	-108.427	-108.427	-108.407	-108.407	-108.3	-108.348	-108.282	-108.282	-108.228	-108.228	-108.197		1.45	-0.210319	-0.0760393	-0.0614827	-0.0614827	-0.0177216	-0.0177216	0.106723
	1.35	0.288548	0.908604	-108.298	-108.293	-108.266	-108.266	-108.236	-108.236	-108.068	-108.094	-108.094	-108.029	-108.029	-108.184		-108.385	-108.34	-108.34	-108.177	-108.177	-108.22	-108.322	-108.322	-108.123	-108.123	-108.275	-108.115	-108.47	-108.419	-108.419	-108.407	-108.407	-108.29	-108.349	-108.262	-108.262	-108.202	-108.202	-108.187		1.4	-0.150754	-0.0768863	-0.0567131	-0.056713	-0.0194131	-0.0194131	0.125502
	1.3	0.327621	0.921287	-108.219	-108.29	-108.255	-108.255	-108.234	-108.234	-108.04	-108.069	-108.069	-107.988	-107.995	-108.182		-108.38	-108.33	-108.33	-108.161	-108.161	-108.217	-108.319	-108.319	-108.13	-108.13	-108.274	-108.111	-108.465	-108.407	-108.407	-108.404	-108.404	-108.281	-108.347	-108.239	-108.239	-108.195	-108.195	-108.18		1.35	-0.0818277	-0.0763793	-0.0491349	-0.0491349	-0.0196468	-0.0196468	0.148588
	1.25	0.364181	0.894728	-108.129	-108.284	-108.239	-108.239	-108.229	-108.229	-108.004	-108.038	-108.038	-107.943	-107.963	-108.176	-107.943	-108.371	-108.313	-108.313	-108.152	-108.152	-108.213	-108.311	-108.311	-108.147	-108.147	-108.267	-108.107	-108.454	-108.394	-108.394	-108.387	-108.387	-108.272	-108.339	-108.217	-108.217	-108.207	-108.207	-108.163		1.3	-0.00263953	-0.073716	-0.0379374	-0.0379374	-0.0175827	-0.0175827	0.177113
	1.2	0.395197	0.857426	-108.029	-108.272	-108.217	-108.217	-108.217	-108.217	-107.959	-107.997	-107.997	-107.898	-107.921	-108.164	-107.898	-108.353	-108.295	-108.295	-108.16	-108.16	-108.207	-108.287	-108.287	-108.146	-108.146	-108.252	-108.101	-108.435	-108.376	-108.376	-108.358	-108.358	-108.259	-108.322	-108.218	-108.218	-108.201	-108.201	-108.153		1.25	0.0872809	-0.0676001	-0.0220554	-0.0220554	-0.0118811	-0.0118811	0.212706
	1.15	0.41915	0.816589	-107.919	-108.251	-108.196	-108.196	-108.185	-108.185	-107.899	-107.944	-107.944	-107.846	-107.866	-108.143	-107.846	-108.326	-108.268	-108.268	-108.165	-108.165	-108.194	-108.25	-108.25	-108.134	-108.134	-108.227	-108.088	-108.406	-108.348	-108.348	-108.317	-108.317	-108.24	-108.295	-108.221	-108.221	-108.183	-108.183	-108.135		1.2	0.187589	-0.0557966	-0.000289506	-0.000289506	8.93813e-05	8.93823e-05	0.257989
	1.1	0.437616	0.776164	-107.801	-108.215	-108.159	-108.159	-108.139	-108.139	-107.82	-107.87	-107.87	-107.779	-107.79	-108.107	-107.779	-108.284	-108.228	-108.228	-108.157	-108.157	-108.168	-108.196	-108.196	-108.109	-108.109	-108.188	-108.062	-108.363	-108.306	-108.306	-108.261	-108.261	-108.213	-108.254	-108.213	-108.21	-108.153	-108.153	-108.106		1.15	0.297157	-0.0344267	0.0209876	0.0209876	0.0314613	0.0314613	0.317392
	1.05	0.452364	0.740666	-107.669	-108.157	-108.103	-108.103	-108.071	-108.071	-107.713	-107.769	-107.769	-107.688	-107.688	-108.051	-107.688	-108.224	-108.169	-108.169	-108.122	-108.122	-108.123	-108.129	-108.129	-108.065	-108.065	-108.129	-108.016	-108.302	-108.245	-108.245	-108.195	-108.187	-108.184	-108.187	-108.184	-108.162	-108.107	-108.107	-108.059		1.1	0.415783	0.00199188	0.0572154	0.0572154	0.077577	0.077577	0.397111
	1	0.463372	0.711504	-107.516	-108.073	-108.019	-108.019	-107.972	-107.972	-107.574	-107.635	-107.635	-107.569	-107.569	-107.968	-107.553	-108.138	-108.084	-108.084	-108.019	-108.019	-108.045	-108.078	-108.078	-107.994	-107.994	-108.052	-107.946	-108.215	-108.158	-108.158	-108.139	-108.139	-108.091	-108.109	-108.081	-108.081	-108.037	-108.037	-107.988		1.05	0.547243	0.0591982	0.113972	0.113972	0.145861	0.145861	0.503425
																																										1	0.700182	0.143336	0.197439	0.197439	0.244219	0.244219	0.642777
[truncated: 30 more columns]

## Sheet: 2SF-1IP Data
				CAS							1x							S								Graphing Energy Levels (Relative)
		LUMO	HOMO	ROHF	Root 1	Root 2	Root 3	Root 4	Root 5	Root 6	ROHF	Root 1	Root 2	Root 3	Root 4	Root 5	Root 6	ROHF	Root 1	Root 2	Root 3	Root 4	Root 5	Root 6			CAS							1x							S
	4.5	-0.172359	0.949828	-108.777	-108.215	-108.215	-108.215	-108.214	-108.214	-108.214	-108.777	-108.254	-108.254	-108.254	-108.253	-108.253	-108.253	-108.777	-108.346	-108.345	-108.345	-108.345	-108.345	-108.345			ROHF	Root 1	Root 2	Root 3	Root 4	Root 5	Root 6	ROHF	Root 1	Root 2	Root 3	Root 4	Root 5	Root 6	ROHF	Root 1	Root 2	Root 3	Root 4	Root 5	Root 6
	4.49	-0.17232	0.949538	-108.777	-108.215	-108.215	-108.215	-108.214	-108.214	-108.214	-108.777	-108.254	-108.254	-108.254	-108.253	-108.253	-108.253	-108.777	-108.346	-108.345	-108.345	-108.345	-108.345	-108.345		4.5	-0.562018	0	0.000315888	0.000315888	0.000371297	0.000371297	0.00068465	-0.522934	0	0.0003755	0.0003755	0.000434627	0.000434627	0.00073971	-0.431329	0	0.000371121	0.000371121	0.000430072	0.000430072	0.000735973
	4.48	-0.172281	0.949241	-108.777	-108.215	-108.215	-108.215	-108.214	-108.214	-108.214	-108.777	-108.254	-108.254	-108.254	-108.253	-108.253	-108.253	-108.777	-108.346	-108.345	-108.345	-108.345	-108.345	-108.345		4.49	-0.562018	-9.1053e-06	0.000314381	0.000314381	0.000371445	0.000371445	0.000692276	-0.522935	-1.33365e-05	0.000370777	0.000370777	0.000431669	0.000431669	0.000744521	-0.431329	-1.31368e-05	0.000366523	0.000366523	0.000427233	0.000427233	0.000740842
	4.47	-0.172241	0.948937	-108.777	-108.215	-108.215	-108.215	-108.214	-108.214	-108.214	-108.777	-108.254	-108.254	-108.254	-108.253	-108.253	-108.253	-108.777	-108.346	-108.345	-108.345	-108.345	-108.345	-108.345		4.48	-0.562018	-1.84165e-05	0.000312834	0.000312834	0.000371598	0.000371598	0.00070005	-0.522935	-2.69486e-05	0.000365954	0.000365954	0.000428663	0.000428663	0.000749451	-0.43133	-2.65519e-05	0.000361828	0.000361828	0.000424346	0.000424346	0.000745833
	4.46	-0.172201	0.948626	-108.777	-108.215	-108.215	-108.215	-108.214	-108.214	-108.214	-108.777	-108.254	-108.254	-108.254	-108.253	-108.253	-108.253	-108.777	-108.346	-108.345	-108.345	-108.345	-108.345	-108.345		4.47	-0.562018	-2.7936e-05	0.000311235	0.000311235	0.000371745	0.000371745	0.00070797	-0.522935	-4.08345e-05	0.000361031	0.000361031	0.000425606	0.000425606	0.000754493	-0.43133	-4.02376e-05	0.000357034	0.000357034	0.000421411	0.000421411	0.000750934
	4.45	-0.17216	0.948309	-108.777	-108.215	-108.215	-108.215	-108.214	-108.214	-108.214	-108.777	-108.254	-108.254	-108.254	-108.253	-108.253	-108.253	-108.777	-108.346	-108.345	-108.345	-108.345	-108.345	-108.345		4.46	-0.562019	-3.76684e-05	0.000309584	0.000309584	0.000371886	0.000371886	0.000716036	-0.522935	-5.49995e-05	0.000356005	0.000356005	0.000422496	0.000422496	0.000759647	-0.43133	-5.41988e-05	0.000352139	0.000352139	0.000418424	0.000418424	0.000756146
	4.44	-0.172118	0.947985	-108.777	-108.215	-108.215	-108.215	-108.214	-108.214	-108.214	-108.777	-108.254	-108.254	-108.254	-108.253	-108.253	-108.253	-108.777	-108.346	-108.345	-108.345	-108.345	-108.345	-108.345		4.45	-0.562019	-4.76181e-05	0.000307877	0.000307877	0.00037202	0.00037202	0.00072425	-0.522936	-6.94491e-05	0.000350873	0.000350873	0.000419331	0.000419331	0.000764914	-0.43133	-6.84411e-05	0.000347141	0.000347141	0.000415385	0.000415385	0.00076147
	4.43	-0.172075	0.947653	-108.777	-108.215	-108.215	-108.215	-108.214	-108.214	-108.214	-108.777	-108.254	-108.254	-108.254	-108.253	-108.253	-108.253	-108.777	-108.346	-108.345	-108.345	-108.345	-108.345	-108.345		4.44	-0.562019	-5.77893e-05	0.000306113	0.000306113	0.000372146	0.000372146	0.000732614	-0.522936	-8.41889e-05	0.000345631	0.000345631	0.000416109	0.000416109	0.000770295	-0.431331	-8.29697e-05	0.000342036	0.000342036	0.000412292	0.000412292	0.000766906
	4.42	-0.172031	0.947315	-108.777	-108.215	-108.215	-108.215	-108.214	-108.214	-108.214	-108.777	-108.254	-108.254	-108.254	-108.253	-108.253	-108.253	-108.777	-108.346	-108.345	-108.345	-108.345	-108.345	-108.345		4.43	-0.562019	-6.81863e-05	0.000304291	0.000304291	0.000372264	0.000372264	0.00074113	-0.522936	-9.92245e-05	0.000340278	0.000340278	0.000412829	0.000412829	0.000775791	-0.431331	-9.77905e-05	0.000336823	0.000336823	0.000409144	0.000409144	0.000772456
	4.41	-0.171987	0.94697	-108.777	-108.215	-108.215	-108.215	-108.214	-108.214	-108.214	-108.777	-108.254	-108.254	-108.254	-108.253	-108.253	-108.253	-108.777	-108.346	-108.345	-108.345	-108.345	-108.345	-108.345		4.42	-0.56202	-7.88135e-05	0.000302408	0.000302408	0.000372373	0.000372373	0.000749799	-0.522936	-0.000114562	0.000334809	0.000334809	0.000409489	0.000409489	0.000781402	-0.431331	-0.000112909	0.000331497	0.000331497	0.000405938	0.000405938	0.00077812
	4.4	-0.171942	0.946618	-108.777	-108.215	-108.215	-108.215	-108.214	-108.214	-108.214	-108.777	-108.254	-108.254	-108.254	-108.253	-108.253	-108.253	-108.777	-108.346	-108.345	-108.345	-108.345	-108.345	-108.345		4.41	-0.56202	-8.96755e-05	0.000300463	0.000300463	0.000372473	0.000372473	0.000758623	-0.522937	-0.000130206	0.000329222	0.000329222	0.000406088	0.000406088	0.000787131	-0.431331	-0.000128331	0.000326057	0.000326057	0.000402673	0.000402673	0.0007839
	4.39	-0.171895	0.946258	-108.777	-108.215	-108.215	-108.215	-108.214	-108.214	-108.214	-108.777	-108.254	-108.254	-108.254	-108.254	-108.254	-108.253	-108.777	-108.346	-108.345	-108.345	-108.345	-108.345	-108.345		4.4	-0.56202	-0.000100777	0.000298453	0.000298453	0.000372562	0.000372562	0.000767604	-0.522937	-0.000146164	0.000323514	0.000323514	0.000402623	0.000402623	0.000792976	-0.431332	-0.000144062	0.000320498	0.000320498	0.000399348	0.000399348	0.000789795
	4.38	-0.171848	0.945891	-108.777	-108.215	-108.215	-108.215	-108.214	-108.214	-108.214	-108.777	-108.254	-108.254	-108.254	-108.254	-108.254	-108.253	-108.777	-108.346	-108.345	-108.345	-108.345	-108.345	-108.345		4.39	-0.56202	-0.000112121	0.000296378	0.000296378	0.00037264	0.00037264	0.000776744	-0.522937	-0.000162442	0.000317682	0.000317682	0.000399092	0.000399092	0.00079894	-0.431332	-0.000160109	0.000314818	0.000314818	0.00039596	0.00039596	0.000795807
	4.37	-0.1718	0.945517	-108.777	-108.215	-108.215	-108.215	-108.214	-108.214	-108.214	-108.777	-108.254	-108.254	-108.254	-108.254	-108.254	-108.253	-108.777	-108.346	-108.345	-108.345	-108.345	-108.345	-108.345		4.38	-0.562021	-0.000123715	0.000294234	0.000294234	0.000372707	0.000372707	0.000786045	-0.522938	-0.000179045	0.000311722	0.000311722	0.000395495	0.000395495	0.000805023	-0.431332	-0.000176478	0.000309014	0.000309014	0.000392508	0.000392508	0.000801936
	4.36	-0.171751	0.945134	-108.777	-108.215	-108.215	-108.215	-108.214	-108.214	-108.214	-108.777	-108.254	-108.254	-108.254	-108.254	-108.254	-108.253	-108.777	-108.346	-108.345	-108.345	-108.345	-108.345	-108.345		4.37	-0.562021	-0.000135562	0.00029202	0.00029202	0.000372762	0.000372762	0.000795508	-0.522938	-0.000195981	0.00030563	0.00030563	0.000391828	0.000391828	0.000811226	-0.431332	-0.000193174	0.000303082	0.000303082	0.00038899	0.00038899	0.000808183
	4.35	-0.171701	0.944744	-108.777	-108.215	-108.215	-108.215	-108.214	-108.214	-108.214	-108.777	-108.254	-108.254	-108.254	-108.254	-108.254	-108.253	-108.777	-108.346	-108.345	-108.345	-108.345	-108.345	-108.345		4.36	-0.562021	-0.000147667	0.000289734	0.000289734	0.000372803	0.000372803	0.000805136	-0.522938	-0.000213254	0.000299405	0.000299405	0.00038809	0.00038809	0.00081755	-0.431333	-0.000210204	0.00029702	0.00029702	0.000385404	0.000385404	0.000814549
	4.34	-0.17165	0.944347	-108.777	-108.215	-108.215	-108.215	-108.214	-108.214	-108.214	-108.777	-108.254	-108.254	-108.254	-108.254	-108.254	-108.253	-108.777	-108.346	-108.345	-108.345	-108.345	-108.345	-108.345		4.35	-0.562022	-0.000160035	0.000287374	0.000287374	0.000372831	0.000372831	0.00081493	-0.522938	-0.000230874	0.00029304	0.00029304	0.000384278	0.000384278	0.000823995	-0.431333	-0.000227576	0.000290822	0.000290822	0.000381747	0.000381747	0.000821034
	4.33	-0.171598	0.943941	-108.777	-108.215	-108.215	-108.215	-108.214	-108.214	-108.214	-108.777	-108.254	-108.254	-108.254	-108.254	-108.254	-108.253	-108.777	-108.346	-108.345	-108.345	-108.345	-108.345	-108.345		4.34	-0.562022	-0.000172671	0.000284936	0.000284936	0.000372844	0.000372844	0.000824892	-0.522939	-0.000248844	0.000286534	0.000286534	0.000380391	0.000380391	0.000830561	-0.431333	-0.000245294	0.000284487	0.000284487	0.000378018	0.000378018	0.000827638
	4.32	-0.171545	0.943527	-108.777	-108.215	-108.215	-108.215	-108.214	-108.214	-108.214	-108.777	-108.254	-108.254	-108.254	-108.254	-108.254	-108.253	-108.777	-108.346	-108.345	-108.345	-108.345	-108.345	-108.345		4.33	-0.562022	-0.00018558	0.00028242	0.00028242	0.000372842	0.000372842	0.000835023	-0.522939	-0.000267173	0.000279883	0.000279883	0.000376425	0.000376425	0.000837251	-0.431334	-0.000263367	0.00027801	0.00027801	0.000374215	0.000374215	0.000834363
	4.31	-0.171491	0.943106	-108.777	-108.215	-108.215	-108.215	-108.214	-108.214	-108.214	-108.777	-108.254	-108.254	-108.254	-108.254	-108.254	-108.253	-108.777	-108.346	-108.345	-108.345	-108.345	-108.345	-108.345		4.32	-0.562023	-0.000198768	0.000279823	0.000279823	0.000372824	0.000372824	0.000845327	-0.522939	-0.000285868	0.000273082	0.000273082	0.00037238	0.00037238	0.000844063	-0.431334	-0.000281801	0.000271387	0.000271387	0.000370335	0.000370335	0.000841208
	4.3	-0.171436	0.942676	-108.777	-108.215	-108.215	-108.215	-108.214	-108.214	-108.214	-108.777	-108.254	-108.254	-108.254	-108.254	-108.254	-108.253	-108.777	-108.346	-108.345	-108.345	-108.345	-108.345	-108.345		4.31	-0.562023	-0.000212239	0.000277142	0.000277142	0.000372788	0.000372788	0.000855804	-0.52294	-0.000304935	0.000266127	0.000266127	0.000368252	0.000368252	0.000850999	-0.431334	-0.000300602	0.000264615	0.000264615	0.000366376	0.000366376	0.000848175
	4.29	-0.17138	0.942238	-108.777	-108.215	-108.215	-108.215	-108.214	-108.214	-108.214	-108.777	-108.254	-108.254	-108.254	-108.254	-108.254	-108.253	-108.777	-108.346	-108.345	-108.345	-108.345	-108.345	-108.345		4.3	-0.562023	-0.000226	0.000274375	0.000274375	0.000372734	0.000372734	0.000866457	-0.52294	-0.000324383	0.000259015	0.000259015	0.000364039	0.000364039	0.00085806	-0.431335	-0.000319779	0.00025769	0.00025769	0.000362336	0.000362336	0.000855263
	4.28	-0.171323	0.941791	-108.777	-108.215	-108.215	-108.215	-108.214	-108.214	-108.214	-108.777	-108.254	-108.254	-108.254	-108.254	-108.254	-108.253	-108.777	-108.346	-108.345	-108.345	-108.345	-108.345	-108.345		4.29	-0.562024	-0.000240055	0.00027152	0.00027152	0.000372661	0.000372661	0.000877288	-0.52294	-0.000344217	0.000251736	0.000251736	0.000359733	0.000359733	0.000865245	-0.431335	-0.000339338	0.000250607	0.000250607	0.000358212	0.000358212	0.000862472
	4.27	-0.171265	0.941336	-108.777	-108.215	-108.215	-108.215	-108.214	-108.214	-108.214	-108.777	-108.254	-108.254	-108.254	-108.254	-108.254	-108.253	-108.777	-108.346	-108.345	-108.345	-108.345	-108.345	-108.345		4.28	-0.562024	-0.00025441	0.000268573	0.000268573	0.000372568	0.000372568	0.000888298	-0.522941	-0.000364446	0.000244296	0.000244296	0.000355342	0.000355342	0.000872555	-0.431335	-0.000359287	0.000243363	0.000243363	0.000354002	0.000354002	0.000869804
	4.26	-0.171206	0.940873	-108.777	-108.215	-108.215	-108.215	-108.214	-108.214	-108.214	-108.777	-108.254	-108.254	-108.254	-108.254	-108.254	-108.253	-108.777	-108.346	-108.345	-108.345	-108.345	-108.345	-108.345		4.27	-0.562024	-0.000269071	0.000265533	0.000265533	0.000372454	0.000372454	0.000899489	-0.522941	-0.000385077	0.000236686	0.000236686	0.000350859	0.000350859	0.000879991	-0.431336	-0.000379634	0.000235953	0.000235953	0.000349704	0.000349704	0.000877258
	4.25	-0.171146	0.940401	-108.777	-108.215	-108.215	-108.215	-108.214	-108.214	-108.214	-108.777	-108.254	-108.254	-108.254	-108.254	-108.254	-108.253	-108.777	-108.346	-108.345	-108.345	-108.345	-108.345	-108.345		4.26	-0.562025	-0.000284043	0.000262396	0.000262396	0.000372318	0.000372318	0.000910864	-0.522942	-0.000406119	0.000228901	0.000228901	0.00034628	0.00034628	0.000887552	-0.431336	-0.000400386	0.000228373	0.000228373	0.000345314	0.000345314	0.000884834
	4.24	-0.171085	0.93992	-108.777	-108.215	-108.215	-108.215	-108.214	-108.214	-108.214	-108.777	-108.254	-108.254	-108.254	-108.254	-108.254	-108.253	-108.777	-108.346	-108.345	-108.345	-108.345	-108.345	-108.345		4.25	-0.562025	-0.000299332	0.000259159	0.000259159	0.000372158	0.000372158	0.000922424	-0.522942	-0.000427578	0.000220937	0.000220937	0.000341603	0.000341603	0.00089524	-0.431337	-0.00042155	0.000220619	0.000220619	0.00034083	0.00034083	0.000892533
	4.23	-0.171022	0.93943	-108.777	-108.215	-108.215	-108.215	-108.214	-108.214	-108.214	-108.777	-108.254	-108.254	-108.254	-108.254	-108.254	-108.253	-108.777	-108.346	-108.345	-108.345	-108.345	-108.345	-108.345		4.24	-0.562026	-0.000314945	0.000255821	0.000255821	0.000371974	0.000371974	0.000934171	-0.522942	-0.000449463	0.000212789	0.000212789	0.000336824	0.000336824	0.000903054	-0.431337	-0.000443136	0.000212686	0.000212686	0.000336249	0.000336249	0.000900355
	4.22	-0.170959	0.938932	-108.777	-108.215	-108.215	-108.215	-108.214	-108.214	-108.214	-108.777	-108.254	-108.254	-108.254	-108.254	-108.254	-108.253	-108.777	-108.346	-108.345	-108.345	-108.345	-108.345	-108.345		4.23	-0.562026	-0.000330887	0.000252377	0.000252377	0.000371765	0.000371765	0.000946107	-0.522943	-0.000471783	0.000204452	0.000204452	0.000331942	0.000331942	0.000910994	-0.431337	-0.000465151	0.000204568	0.000204568	0.000331568	0.000331568	0.000908299
	4.21	-0.170894	0.938424	-108.777	-108.215	-108.215	-108.215	-108.214	-108.214	-108.214	-108.777	-108.254	-108.254	-108.254	-108.254	-108.254	-108.253	-108.777	-108.346	-108.345	-108.345	-108.345	-108.345	-108.345		4.22	-0.562026	-0.000347164	0.000248826	0.000248826	0.000371528	0.000371528	0.000958235	-0.522943	-0.000494545	0.000195921	0.000195921	0.000326952	0.000326952	0.000919061	-0.431338	-0.000487604	0.000196263	0.000196263	0.000326785	0.000326785	0.000916366
	4.2	-0.170828	0.937908	-108.777	-108.215	-108.215	-108.215	-108.214	-108.214	-108.214	-108.777	-108.254	-108.254	-108.254	-108.254	-108.254	-108.253	-108.777	-108.346	-108.345	-108.345	-108.345	-108.345	-108.345		4.21	-0.562027	-0.000363783	0.000245163	0.000245163	0.000371264	0.000371264	0.000970556	-0.522943	-0.000517759	0.000187191	0.000187191	0.000321852	0.000321852	0.000927255	-0.431338	-0.000510503	0.000187763	0.000187763	0.000321896	0.000321896	0.000924555
	4.19	-0.170761	0.937383	-108.777	-108.215	-108.215	-108.215	-108.214	-108.214	-108.214	-108.777	-108.254	-108.254	-108.254	-108.254	-108.254	-108.253	-108.777	-108.346	-108.345	-108.345	-108.345	-108.345	-108.345		4.2	-0.562027	-0.00038075	0.000241385	0.000241385	0.00037097	0.00037097	0.000983072	-0.522944	-0.000541433	0.000178258	0.000178258	0.000316639	0.000316639	0.000935576	-0.431339	-0.000533856	0.000179065	0.000179065	0.000316899	0.000316899	0.000932866
	4.18	-0.170693	0.936848	-108.777	-108.215	-108.215	-108.215	-108.214	-108.214	-108.214	-108.777	-108.254	-108.254	-108.254	-108.254	-108.254	-108.253	-108.777	-108.346	-108.345	-108.345	-108.345	-108.345	-108.345		4.19	-0.562027	-0.000398072	0.00023749	0.00023749	0.000370645	0.000370645	0.000995785	-0.522944	-0.000565575	0.000169115	0.000169115	0.000311309	0.000311309	0.000944024	-0.431339	-0.000557673	0.000170164	0.000170164	0.000311789	0.000311789	0.0009413
	4.17	-0.170624	0.936304	-108.777	-108.215	-108.215	-108.215	-108.214	-108.214	-108.214	-108.777	-108.255	-108.254	-108.254	-108.254	-108.254	-108.253	-108.777	-108.346	-108.345	-108.345	-108.345	-108.345	-108.345		4.18	-0.562028	-0.000415754	0.000233474	0.000233474	0.000370288	0.000370288	0.0010087	-0.522945	-0.000590195	0.000159757	0.000159757	0.000305858	0.000305858	0.000952599	-0.431339	-0.000581963	0.000161053	0.000161053	0.000306565	0.000306565	0.000949855
	4.16	-0.170553	0.935751	-108.777	-108.215	-108.215	-108.215	-108.214	-108.214	-108.214	-108.777	-108.255	-108.254	-108.254	-108.254	-108.254	-108.253	-108.777	-108.346	-108.345	-108.345	-108.345	-108.345	-108.345		4.17	-0.562028	-0.000433804	0.000229334	0.000229334	0.000369898	0.000369898	0.00102181	-0.522945	-0.000615303	0.000150179	0.000150179	0.000300284	0.000300284	0.0009613	-0.43134	-0.000606735	0.000151728	0.000151728	0.000301221	0.000301221	0.000958532
	4.15	-0.170481	0.935189	-108.777	-108.215	-108.215	-108.215	-108.214	-108.214	-108.214	-108.777	-108.255	-108.254	-108.254	-108.254	-108.254	-108.253	-108.777	-108.346	-108.345	-108.345	-108.345	-108.345	-108.345		4.16	-0.562029	-0.000452228	0.000225065	0.000225065	0.000369472	0.000369472	0.00103513	-0.522945	-0.000640907	0.000140374	0.000140374	0.000294582	0.000294582	0.000970128	-0.43134	-0.000631998	0.000142183	0.000142183	0.000295756	0.000295756	0.00096733
	4.14	-0.170408	0.934617	-108.777	-108.215	-108.215	-108.215	-108.214	-108.214	-108.214	-108.777	-108.255	-108.254	-108.254	-108.254	-108.254	-108.253	-108.777	-108.346	-108.345	-108.345	-108.345	-108.345	-108.345		4.15	-0.562029	-0.000471034	0.000220665	0.000220665	0.000369009	0.000369009	0.00104865	-0.522946	-0.000667017	0.000130338	0.000130338	0.00028875	0.00028875	0.000979082	-0.43134	-0.000657762	0.000132412	0.000132412	0.000290165	0.000290165	0.000976248
	4.13	-0.170333	0.934036	-108.777	-108.215	-108.215	-108.215	-108.214	-108.214	-108.214	-108.777	-108.255	-108.254	-108.254	-108.254	-108.254	-108.253	-108.777	-108.346	-108.345	-108.345	-108.345	-108.345	-108.345		4.14	-0.562029	-0.000490227	0.00021613	0.00021613	0.000368509	0.000368509	0.00106239	-0.522946	-0.000693643	0.000120064	0.000120064	0.000282782	0.000282782	0.000988162	-0.431341	-0.000684036	0.000122409	0.000122409	0.000284445	0.000284445	0.000985287
	4.12	-0.170258	0.933445	-108.777	-108.215	-108.215	-108.215	-108.214	-108.214	-108.214	-108.777	-108.255	-108.254	-108.254	-108.254	-108.254	-108.253	-108.777	-108.346	-108.345	-108.345	-108.345	-108.345	-108.345		4.13	-0.56203	-0.000509816	0.000211455	0.000211455	0.000367968	0.000367968	0.00107633	-0.522947	-0.000720794	0.000109546	0.000109546	0.000276677	0.000276677	0.000997368	-0.431341	-0.000710831	0.000112169	0.000112169	0.000278592	0.000278592	0.000994444
	4.11	-0.170181	0.932845	-108.777	-108.215	-108.215	-108.215	-108.214	-108.214	-108.214	-108.777	-108.255	-108.254	-108.254	-108.254	-108.254	-108.253	-108.777	-108.346	-108.345	-108.345	-108.345	-108.345	-108.344		4.12	-0.56203	-0.000529808	0.000206638	0.000206638	0.000367385	0.000367385	0.00109048	-0.522947	-0.000748482	9.8778e-05	9.8778e-05	0.000270428	0.000270428	0.0010067	-0.431342	-0.000738156	0.000101685	0.000101685	0.000272602	0.000272602	0.00100372
	4.1	-0.170102	0.932235	-108.777	-108.215	-108.215	-108.215	-108.214	-108.214	-108.214	-108.777	-108.255	-108.254	-108.254	-108.254	-108.254	-108.253	-108.777	-108.346	-108.345	-108.345	-108.345	-108.345	-108.344		4.11	-0.562031	-0.000550209	0.000201673	0.000201673	0.000366759	0.000366759	0.00110485	-0.522947	-0.000776716	8.77531e-05	8.77531e-05	0.000264033	0.000264033	0.00101615	-0.431342	-0.000766023	9.09518e-05	9.09518e-05	0.000266471	0.000266471	0.00101311
	4.09	-0.170023	0.931616	-108.777	-108.215	-108.215	-108.215	-108.214	-108.214	-108.214	-108.777	-108.255	-108.254	-108.254	-108.254	-108.254	-108.253	-108.777	-108.346	-108.345	-108.345	-108.345	-108.345	-108.344		4.1	-0.562031	-0.000571028	0.000196557	0.000196557	0.000366087	0.000366087	0.00111944	-0.522948	-0.000805507	7.64648e-05	7.64648e-05	0.000257487	0.000257487	0.00102573	-0.431342	-0.000794441	7.99617e-05	7.99617e-05	0.000260195	0.000260195	0.00102263
	4.08	-0.169941	0.930987	-108.777	-108.215	-108.215	-108.215	-108.214	-108.214	-108.214	-108.777	-108.255	-108.254	-108.254	-108.254	-108.254	-108.253	-108.777	-108.346	-108.345	-108.345	-108.345	-108.345	-108.344		4.09	-0.562031	-0.000592271	0.000191285	0.000191285	0.000365369	0.000365369	0.00113424	-0.522948	-0.000834866	6.49066e-05	6.49066e-05	0.000250786	0.000250786	0.00103544	-0.431343	-0.000823421	6.87087e-05	6.87087e-05	0.00025377	0.00025377	0.00103225
	4.07	-0.169859	0.930349	-108.777	-108.215	-108.215	-108.215	-108.214	-108.214	-108.214	-108.777	-108.255	-108.254	-108.254	-108.254	-108.254	-108.253	-108.777	-108.346	-108.345	-108.345	-108.345	-108.345	-108.344		4.08	-0.562032	-0.000613947	0.000185854	0.000185854	0.000364601	0.000364601	0.00114927	-0.522948	-0.000864803	5.30714e-05	5.30714e-05	0.000243925	0.000243925	0.00104526	-0.431343	-0.000852974	5.7186e-05	5.7186e-05	0.000247192	0.000247192	0.00104199
	4.06	-0.169775	0.929701	-108.777	-108.215	-108.215	-108.215	-108.214	-108.214	-108.214	-108.777	-108.255	-108.254	-108.254	-108.254	-108.254	-108.253	-108.777	-108.346	-108.345	-108.345	-108.345	-108.345	-108.344		4.07	-0.562032	-0.000636064	0.000180258	0.000180258	0.000363781	0.000363781	0.00116452	-0.522949	-0.00089533	4.09522e-05	4.09522e-05	0.0002369	0.0002369	0.00105522	-0.431343	-0.000883112	4.53866e-05	4.53866e-05	0.000240456	0.000240456	0.00105185
	4.05	-0.16969	0.929043	-108.777	-108.215	-108.215	-108.215	-108.214	-108.214	-108.214	-108.777	-108.255	-108.254	-108.254	-108.254	-108.254	-108.253	-108.777	-108.346	-108.345	-108.345	-108.345	-108.345	-108.344		4.06	-0.562032	-0.000658629	0.000174494	0.000174494	0.000362908	0.000362908	0.00118	-0.522949	-0.000926458	2.85418e-05	2.85418e-05	0.000229706	0.000229706	0.00106529	-0.431344	-0.000913846	3.33036e-05	3.33036e-05	0.000233557	0.000233557	0.00106182
	4.04	-0.169603	0.928375	-108.777	-108.216	-108.215	-108.215	-108.214	-108.214	-108.214	-108.777	-108.255	-108.254	-108.254	-108.254	-108.254	-108.253	-108.777	-108.346	-108.345	-108.345	-108.345	-108.345	-108.344		4.05	-0.562033	-0.00068165	0.000168555	0.000168555	0.000361979	0.000361979	0.0011957	-0.522949	-0.000958199	1.58327e-05	1.58327e-05	0.000222339	0.000222339	0.00107548	-0.431344	-0.000945188	2.09295e-05	2.09295e-05	0.000226492	0.000226492	0.0010719
	4.03	-0.169515	0.927698	-108.777	-108.216	-108.215	-108.215	-108.214	-108.214	-108.214	-108.777	-108.255	-108.254	-108.254	-108.254	-108.254	-108.253	-108.777	-108.347	-108.346	-108.346	-108.345	-108.345	-108.344		4.04	-0.562033	-0.000705136	0.000162438	0.000162438	0.000360992	0.000360992	0.00121164	-0.52295	-0.000990564	2.8174e-06	2.8174e-06	0.000214793	0.000214793	0.00108579	-0.431344	-0.000977149	8.2508e-06	8.2508e-06	0.000219248	0.000219248	0.00108209
	4.02	-0.169425	0.927012	-108.777	-108.216	-108.215	-108.215	-108.214	-108.214	-108.214	-108.777	-108.255	-108.254	-108.254	-108.254	-108.254	-108.253	-108.777	-108.347	-108.346	-108.346	-108.345	-108.345	-108.344		4.03	-0.562033	-0.000729095	0.000156137	0.000156137	0.000359944	0.000359944	0.00122781	-0.52295	-0.00102357	-1.05119e-05	-1.05119e-05	0.000207064	0.000207064	0.00109621	-0.431345	-0.00100974	-4.7278e-06	-4.7277e-06	0.000211834	0.000211834	0.00109239
	4.01	-0.169334	0.926316	-108.777	-108.216	-108.215	-108.215	-108.214	-108.214	-108.214	-108.777	-108.255	-108.254	-108.254	-108.254	-108.254	-108.253	-108.777	-108.347	-108.346	-108.346	-108.345	-108.345	-108.344		4.02	-0.562033	-0.000753535	0.000149648	0.000149648	0.000358834	0.000358834	0.00124421	-0.52295	-0.00105722	-2.41632e-05	-2.41632e-05	0.000199146	0.000199146	0.00110676	-0.431345	-0.00104298	-1.80201e-05	-1.80201e-05	0.000204238	0.000204238	0.00110279
	4	-0.169241	0.92561	-108.777	-108.216	-108.215	-108.215	-108.214	-108.214	-108.214	-108.777	-108.255	-108.254	-108.254	-108.254	-108.254	-108.253	-108.777	-108.347	-108.346	-108.346	-108.345	-108.345	-108.344		4.01	-0.562034	-0.000778466	0.000142964	0.000142964	0.000357658	0.000357658	0.00126085	-0.52295	-0.00109153	-3.81445e-05	-3.81445e-05	0.000191034	0.000191034	0.00111742	-0.431345	-0.00107687	-3.16342e-05	-3.16342e-05	0.000196456	0.000196456	0.0011133
	3.99	-0.169147	0.924894	-108.777	-108.216	-108.215	-108.215	-108.214	-108.214	-108.214	-108.777	-108.255	-108.254	-108.254	-108.254	-108.254	-108.253	-108.777	-108.347	-108.346	-108.346	-108.345	-108.345	-108.344		4	-0.562034	-0.000803895	0.000136081	0.000136081	0.000356414	0.000356414	0.00127774	-0.522951	-0.00112651	-5.24716e-05	-5.24716e-05	0.000182715	0.000182715	0.00112819	-0.431345	-0.00111143	-4.55783e-05	-4.55783e-05	0.000188481	0.000188481	0.00112391
	3.98	-0.169051	0.924169	-108.777	-108.216	-108.215	-108.215	-108.214	-108.214	-108.214	-108.777	-108.255	-108.254	-108.254	-108.254	-108.254	-108.253	-108.777	-108.347	-108.346	-108.346	-108.345	-108.345	-108.344		3.99	-0.562034	-0.000829831	0.000128993	0.000128993	0.000355099	0.000355099	0.00129487	-0.522951	-0.00116219	-6.71387e-05	-6.71387e-05	0.000174198	0.000174198	0.00113908	-0.431345	-0.00114667	-5.98608e-05	-5.98608e-05	0.000180309	0.000180309	0.00113463
	3.97	-0.168954	0.923435	-108.777	-108.216	-108.215	-108.215	-108.214	-108.214	-108.213	-108.777	-108.255	-108.254	-108.254	-108.254	-108.254	-108.253	-108.777	-108.347	-108.346	-108.346	-108.345	-108.345	-108.344		3.98	-0.562034	-0.000856285	0.000121693	0.000121693	0.00035371	0.00035371	0.00131224	-0.522951	-0.00119856	-8.21615e-05	-8.21615e-05	0.000165471	0.000165471	0.00115007	-0.431346	-0.00118261	-7.44902e-05	-7.44902e-05	0.000171933	0.000171933	0.00114544
	3.96	-0.168855	0.922691	-108.777	-108.216	-108.215	-108.215	-108.214	-108.214	-108.213	-108.777	-108.255	-108.254	-108.254	-108.254	-108.254	-108.253	-108.777	-108.347	-108.346	-108.346	-108.345	-108.345	-108.344		3.97	-0.562034	-0.000883264	0.000114177	0.000114177	0.000352245	0.000352245	0.00132987	-0.522951	-0.00123565	-9.75491e-05	-9.75491e-05	0.000156526	0.000156526	0.00116118	-0.431346	-0.00121926	-8.94754e-05	-8.94754e-05	0.000163348	0.000163348	0.00115635
	3.95	-0.168754	0.921938	-108.777	-108.216	-108.215	-108.215	-108.214	-108.214	-108.213	-108.777	-108.255	-108.254	-108.254	-108.254	-108.254	-108.253	-108.777	-108.347	-108.346	-108.346	-108.345	-108.345	-108.344		3.96	-0.562034	-0.000910778	0.000106438	0.000106438	0.000350699	0.000350699	0.00134774	-0.522951	-0.00127346	-0.000113311	-0.000113311	0.000147359	0.000147359	0.0011724	-0.431346	-0.00125663	-0.000104825	-0.000104825	0.000154548	0.000154548	0.00116736
	3.94	-0.168652	0.921175	-108.777	-108.216	-108.215	-108.215	-108.214	-108.214	-108.213	-108.777	-108.255	-108.254	-108.254	-108.254	-108.254	-108.253	-108.777	-108.347	-108.346	-108.346	-108.345	-108.345	-108.344		3.95	-0.562034	-0.000938837	9.84693e-05	9.84693e-05	0.000349071	0.000349071	0.00136587	-0.522951	-0.00131202	-0.000129456	-0.000129456	0.000137963	0.000137963	0.00118372	-0.431346	-0.00129474	-0.000120549	-0.000120549	0.000145528	0.000145528	0.00117846
	3.93	-0.168548	0.920403	-108.777	-108.216	-108.215	-108.215	-108.214	-108.214	-108.213	-108.777	-108.255	-108.254	-108.254	-108.254	-108.254	-108.253	-108.777	-108.347	-108.346	-108.346	-108.345	-108.345	-108.344		3.94	-0.562034	-0.00096745	9.02649e-05	9.02649e-05	0.000347356	0.000347356	0.00138426	-0.522951	-0.00135133	-0.000145993	-0.000145993	0.000128332	0.000128332	0.00119514	-0.431346	-0.00133361	-0.000136657	-0.000136657	0.00013628	0.00013628	0.00118965
	3.92	-0.168442	0.919622	-108.777	-108.216	-108.215	-108.215	-108.214	-108.214	-108.213	-108.777	-108.255	-108.254	-108.254	-108.254	-108.254	-108.253	-108.777	-108.347	-108.346	-108.346	-108.345	-108.345	-108.344		3.93	-0.562034	-0.000996628	8.18181e-05	8.18181e-05	0.000345551	0.000345551	0.00140291	-0.522951	-0.00139141	-0.000162934	-0.000162934	0.000118459	0.000118459	0.00120667	-0.431346	-0.00137324	-0.000153157	-0.000153157	0.000126798	0.000126798	0.00120092
	3.91	-0.168334	0.918832	-108.777	-108.216	-108.215	-108.215	-108.214	-108.214	-108.213	-108.777	-108.255	-108.254	-108.254	-108.254	-108.254	-108.253	-108.777	-108.347	-108.346	-108.346	-108.345	-108.345	-108.344		3.92	-0.562034	-0.00102638	7.31218e-05	7.31218e-05	0.000343653	0.000343653	0.00142181	-0.522951	-0.00143228	-0.000180288	-0.000180288	0.000108337	0.000108337	0.00121829	-0.431346	-0.00141365	-0.000170061	-0.000170061	0.000117076	0.000117076	0.00121228
	3.9	-0.168225	0.918033	-108.777	-108.216	-108.215	-108.215	-108.214	-108.214	-108.213	-108.777	-108.255	-108.254	-108.254	-108.254	-108.254	-108.253	-108.777	-108.347	-108.346	-108.346	-108.345	-108.345	-108.344		3.91	-0.562034	-0.00105671	6.41692e-05	6.41692e-05	0.000341658	0.000341658	0.00144099	-0.522951	-0.00147395	-0.000198065	-0.000198065	9.79602e-05	9.79602e-05	0.00123002	-0.431346	-0.00145485	-0.000187377	-0.000187377	0.000107107	0.000107107	0.00122372
	3.89	-0.168114	0.917226	-108.777	-108.216	-108.215	-108.215	-108.214	-108.214	-108.213	-108.777	-108.255	-108.254	-108.254	-108.254	-108.254	-108.253	-108.777	-108.347	-108.346	-108.346	-108.345	-108.345	-108.344		3.9	-0.562034	-0.00108764	5.49528e-05	5.49528e-05	0.000339562	0.000339562	0.00146043	-0.522951	-0.00151644	-0.000216276	-0.000216276	8.73204e-05	8.73204e-05	0.00124183	-0.431345	-0.00149687	-0.000205118	-0.000205118	9.68843e-05	9.68843e-05	0.00123524
	3.88	-0.168002	0.916409	-108.777	-108.216	-108.215	-108.215	-108.214	-108.214	-108.213	-108.777	-108.256	-108.254	-108.254	-108.254	-108.254	-108.253	-108.777	-108.347	-108.346	-108.346	-108.345	-108.345	-108.344		3.89	-0.562034	-0.00111918	4.54651e-05	4.54651e-05	0.000337361	0.000337361	0.00148015	-0.522951	-0.00155975	-0.000234932	-0.000234932	7.64107e-05	7.64107e-05	0.00125374	-0.431345	-0.00153972	-0.000223293	-0.000223293	8.64003e-05	8.64003e-05	0.00124684
	3.87	-0.167887	0.915584	-108.777	-108.216	-108.215	-108.215	-108.214	-108.214	-108.213	-108.777	-108.256	-108.254	-108.254	-108.254	-108.254	-108.253	-108.777	-108.347	-108.346	-108.346	-108.345	-108.345	-108.344		3.88	-0.562034	-0.00115132	3.56983e-05	3.56983e-05	0.00033505	0.00033505	0.00150014	-0.52295	-0.00160392	-0.000254044	-0.000254044	6.52237e-05	6.52237e-05	0.00126574	-0.431345	-0.00158341	-0.000241913	-0.000241913	7.5648e-05	7.5648e-05	0.0012585
	3.86	-0.167771	0.91475	-108.777	-108.216	-108.215	-108.215	-108.214	-108.214	-108.213	-108.777	-108.256	-108.254	-108.254	-108.254	-108.254	-108.253	-108.777	-108.347	-108.346	-108.346	-108.345	-108.345	-108.344		3.87	-0.562033	-0.0011841	2.56446e-05	2.56446e-05	0.000332627	0.000332627	0.0015204	-0.52295	-0.00164895	-0.000273623	-0.000273623	5.37517e-05	5.37517e-05	0.00127782	-0.431345	-0.00162797	-0.00026099	-0.00026099	6.46197e-05	6.46197e-05	0.00127024
	3.85	-0.167652	0.913908	-108.777	-108.216	-108.215	-108.215	-108.214	-108.214	-108.213	-108.777	-108.256	-108.254	-108.254	-108.254	-108.254	-108.253	-108.777	-108.347	-108.346	-108.346	-108.345	-108.345	-108.344		3.86	-0.562033	-0.00121751	1.52956e-05	1.52956e-05	0.000330085	0.000330085	0.00154095	-0.52295	-0.00169485	-0.000293682	-0.000293682	4.19867e-05	4.19867e-05	0.00128999	-0.431344	-0.0016734	-0.000280535	-0.000280535	5.33078e-05	5.33078e-05	0.00128204
	3.84	-0.167532	0.913058	-108.777	-108.216	-108.215	-108.215	-108.214	-108.214	-108.213	-108.777	-108.256	-108.254	-108.254	-108.254	-108.254	-108.253	-108.777	-108.347	-108.346	-108.346	-108.345	-108.345	-108.344		3.85	-0.562032	-0.00125157	4.6428e-06	4.6428e-06	0.00032742	0.00032742	0.00156178	-0.522949	-0.00174166	-0.000314231	-0.000314231	2.99207e-05	2.99207e-05	0.00130224	-0.431344	-0.00171973	-0.000300563	-0.000300563	4.17003e-05	4.17003e-05	0.0012939
	3.83	-0.16741	0.9122	-108.777	-108.216	-108.215	-108.215	-108.214	-108.214	-108.213	-108.777	-108.256	-108.254	-108.254	-108.254	-108.254	-108.253	-108.777	-108.347	-108.346	-108.346	-108.345	-108.345	-108.344		3.84	-0.562032	-0.00128629	-6.3224e-06	-6.3224e-06	0.000324628	0.000324628	0.0015829	-0.522948	-0.00178938	-0.000335284	-0.000335284	1.75454e-05	1.75454e-05	0.00131456	-0.431343	-0.00176697	-0.00032108	-0.00032108	2.97968e-05	2.97968e-05	0.00130581
	3.82	-0.167286	0.911335	-108.777	-108.216	-108.215	-108.215	-108.214	-108.214	-108.213	-108.777	-108.256	-108.254	-108.254	-108.254	-108.254	-108.253	-108.777	-108.347	-108.346	-108.346	-108.345	-108.345	-108.344		3.83	-0.562031	-0.00132168	-1.76092e-05	-1.76092e-05	0.000321704	0.000321704	0.00160431	-0.522948	-0.00183804	-0.000356854	-0.000356854	4.8521e-06	4.8521e-06	0.00132695	-0.431342	-0.00181514	-0.000342101	-0.000342101	1.75852e-05	1.75852e-05	0.00131778
	3.81	-0.16716	0.910461	-108.777	-108.216	-108.215	-108.215	-108.215	-108.215	-108.213	-108.777	-108.256	-108.254	-108.254	-108.254	-108.254	-108.253	-108.777	-108.347	-108.346	-108.346	-108.346	-108.346	-108.344		3.82	-0.56203	-0.00135775	-2.92268e-05	-2.92268e-05	0.000318642	0.000318642	0.001626	-0.522947	-0.00188764	-0.000378952	-0.000378952	-8.1678e-06	-8.1678e-06	0.00133942	-0.431342	-0.00186427	-0.000363639	-0.000363639	5.0568e-06	5.0568e-06	0.00132979
	3.8	-0.167032	0.909579	-108.777	-108.216	-108.215	-108.215	-108.215	-108.215	-108.213	-108.777	-108.256	-108.254	-108.254	-108.254	-108.254	-108.253	-108.777	-108.347	-108.346	-108.346	-108.346	-108.346	-108.344		3.81	-0.562029	-0.00139451	-4.11849e-05	-4.11849e-05	0.000315436	0.000315436	0.001648	-0.522946	-0.00193821	-0.000401592	-0.000401592	-2.15235e-05	-2.15235e-05	0.00135194	-0.431341	-0.00191436	-0.000385708	-0.000385708	-7.7972e-06	-7.7972e-06	0.00134185
	3.79	-0.166902	0.908691	-108.777	-108.216	-108.215	-108.215	-108.215	-108.215	-108.213	-108.777	-108.256	-108.254	-108.254	-108.254	-108.254	-108.253	-108.777	-108.348	-108.346	-108.346	-108.346	-108.346	-108.344		3.8	-0.562028	-0.00143197	-5.35132e-05	-5.35132e-05	0.000312062	0.000312062	0.00167032	-0.522945	-0.00198976	-0.00042478	-0.00042478	-3.52077e-05	-3.52077e-05	0.00136453	-0.43134	-0.00196543	-0.000408323	-0.000408323	-2.09776e-05	-2.09776e-05	0.00135394
	3.78	-0.16677	0.907796	-108.777	-108.216	-108.215	-108.215	-108.215	-108.215	-108.213	-108.777	-108.256	-108.254	-108.254	-108.254	-108.254	-108.253	-108.777	-108.348	-108.346	-108.346	-108.346	-108.346	-108.344		3.79	-0.562027	-0.00147016	-6.6184e-05	-6.6184e-05	0.000308551	0.000308551	0.00169292	-0.522944	-0.00204233	-0.000448545	-0.000448545	-4.92621e-05	-4.92621e-05	0.00137717	-0.431339	-0.00201751	-0.000431491	-0.000431491	-3.45098e-05	-3.45098e-05	0.00136606
	3.77	-0.166636	0.906894	-108.777	-108.216	-108.215	-108.215	-108.215	-108.215	-108.213	-108.777	-108.256	-108.254	-108.254	-108.254	-108.254	-108.252	-108.777	-108.348	-108.346	-108.346	-108.346	-108.346	-108.344		3.78	-0.562026	-0.00150907	-7.92272e-05	-7.92272e-05	0.000304877	0.000304877	0.00171582	-0.522943	-0.00209592	-0.000472895	-0.000472895	-6.36813e-05	-6.36813e-05	0.00138987	-0.431338	-0.00207062	-0.00045523	-0.00045523	-4.83958e-05	-4.83958e-05	0.00137822
	3.76	-0.166499	0.905986	-108.777	-108.216	-108.215	-108.215	-108.215	-108.215	-108.213	-108.777	-108.256	-108.254	-108.254	-108.254	-108.254	-108.252	-108.777	-108.348	-108.346	-108.346	-108.346	-108.346	-108.344		3.77	-0.562025	-0.00154873	-9.2653e-05	-9.2653e-05	0.000301036	0.000301036	0.00173903	-0.522942	-0.00215056	-0.000497843	-0.000497843	-7.84751e-05	-7.84751e-05	0.00140261	-0.431336	-0.00212477	-0.000479555	-0.000479555	-6.26454e-05	-6.26454e-05	0.00139039
	3.75	-0.166361	0.905072	-108.777	-108.216	-108.215	-108.215	-108.215	-108.215	-108.213	-108.777	-108.256	-108.254	-108.254	-108.254	-108.254	-108.252	-108.777	-108.348	-108.346	-108.346	-108.346	-108.346	-108.344		3.76	-0.562024	-0.00158915	-0.000106472	-0.000106472	0.000297021	0.000297021	0.00176255	-0.52294	-0.00220626	-0.000523405	-0.000523405	-9.36537e-05	-9.36537e-05	0.00141539	-0.431335	-0.00217999	-0.000504481	-0.000504481	-7.72686e-05	-7.72686e-05	0.00140258
	3.74	-0.16622	0.904152	-108.777	-108.216	-108.215	-108.215	-108.215	-108.215	-108.213	-108.777	-108.256	-108.254	-108.254	-108.254	-108.254	-108.252	-108.777	-108.348	-108.346	-108.346	-108.346	-108.346	-108.344		3.75	-0.562022	-0.00163033	-0.000120696	-0.000120696	0.000292825	0.000292825	0.00178638	-0.522939	-0.00226305	-0.000549596	-0.000549596	-0.000109228	-0.000109228	0.0014282	-0.431333	-0.0022363	-0.000530022	-0.000530022	-9.2276e-05	-9.2276e-05	0.00141477
	3.73	-0.166077	0.903226	-108.777	-108.217	-108.215	-108.215	-108.215	-108.215	-108.213	-108.777	-108.256	-108.255	-108.255	-108.254	-108.254	-108.252	-108.777	-108.348	-108.346	-108.346	-108.346	-108.346	-108.344		3.74	-0.56202	-0.0016723	-0.000135337	-0.000135337	0.00028844	0.00028844	0.00181053	-0.522937	-0.00232095	-0.000576432	-0.000576432	-0.000125208	-0.000125208	0.00144105	-0.431332	-0.00229372	-0.000556193	-0.000556193	-0.000107678	-0.000107678	0.00142697
	3.72	-0.165932	0.902294	-108.777	-108.217	-108.215	-108.215	-108.215	-108.215	-108.213	-108.777	-108.256	-108.255	-108.255	-108.254	-108.254	-108.252	-108.777	-108.348	-108.346	-108.346	-108.346	-108.346	-108.344		3.73	-0.562019	-0.00171506	-0.000150408	-0.000150408	0.000283861	0.000283861	0.001835	-0.522935	-0.00237997	-0.00060393	-0.00060393	-0.000141606	-0.000141606	0.00145392	-0.43133	-0.00235226	-0.000583012	-0.000583012	-0.000123486	-0.000123486	0.00143917
	3.71	-0.165784	0.901358	-108.777	-108.217	-108.215	-108.215	-108.215	-108.215	-108.213	-108.777	-108.256	-108.255	-108.255	-108.254	-108.254	-108.252	-108.777	-108.348	-108.346	-108.346	-108.346	-108.346	-108.344		3.72	-0.562017	-0.00175863	-0.00016592	-0.00016592	0.000279078	0.000279078	0.0018598	-0.522933	-0.00244014	-0.000632105	-0.000632105	-0.000158434	-0.000158434	0.0014668	-0.431328	-0.00241196	-0.000610494	-0.000610494	-0.000139711	-0.000139711	0.00145135
	3.7	-0.165634	0.900417	-108.777	-108.217	-108.215	-108.215	-108.215	-108.215	-108.213	-108.777	-108.256	-108.255	-108.255	-108.254	-108.254	-108.252	-108.777	-108.348	-108.346	-108.346	-108.346	-108.346	-108.344		3.71	-0.562015	-0.00180302	-0.000181887	-0.000181887	0.000274084	0.000274084	0.00188492	-0.522931	-0.00250149	-0.000660975	-0.000660975	-0.000175702	-0.000175702	0.0014797	-0.431326	-0.00247284	-0.000638655	-0.000638655	-0.000156365	-0.000156365	0.00146352
	3.69	-0.165482	0.899471	-108.777	-108.217	-108.215	-108.215	-108.215	-108.215	-108.213	-108.777	-108.257	-108.255	-108.255	-108.254	-108.254	-108.252	-108.777	-108.348	-108.346	-108.346	-108.346	-108.346	-108.344		3.7	-0.562012	-0.00184824	-0.000198324	-0.000198324	0.00026887	0.00026887	0.00191037	-0.522929	-0.00256403	-0.000690557	-0.000690557	-0.000193424	-0.000193424	0.00149261	-0.431324	-0.00253491	-0.000667514	-0.000667514	-0.00017346	-0.00017346	0.00147566
	3.68	-0.165327	0.898521	-108.777	-108.217	-108.215	-108.215	-108.215	-108.215	-108.213	-108.777	-108.257	-108.255	-108.255	-108.254	-108.254	-108.252	-108.777	-108.348	-108.346	-108.346	-108.346	-108.346	-108.344		3.69	-0.56201	-0.00189432	-0.000215242	-0.000215242	0.000263428	0.000263428	0.00193615	-0.522927	-0.00262778	-0.000720869	-0.000720869	-0.000211612	-0.000211612	0.00150551	-0.431321	-0.0025982	-0.000697087	-0.000697087	-0.000191008	-0.000191008	0.00148776
	3.67	-0.16517	0.897568	-108.777	-108.217	-108.215	-108.215	-108.215	-108.215	-108.213	-108.777	-108.257	-108.255	-108.255	-108.254	-108.254	-108.252	-108.777	-108.348	-108.346	-108.346	-108.346	-108.346	-108.344		3.68	-0.562007	-0.00194126	-0.000232658	-0.000232658	0.00025775	0.00025775	0.00196227	-0.522924	-0.00269278	-0.00075193	-0.00075193	-0.000230279	-0.000230279	0.00151839	-0.431319	-0.00266274	-0.000727393	-0.000727393	-0.000209021	-0.000209021	0.00149982
	3.66	-0.16501	0.896611	-108.777	-108.217	-108.215	-108.215	-108.215	-108.215	-108.213	-108.777	-108.257	-108.255	-108.255	-108.254	-108.254	-108.252	-108.777	-108.348	-108.346	-108.346	-108.346	-108.346	-108.344		3.67	-0.562004	-0.00198908	-0.000250587	-0.000250587	0.000251825	0.000251825	0.00198872	-0.522921	-0.00275904	-0.000783759	-0.000783759	-0.000249438	-0.000249438	0.00153127	-0.431316	-0.00272855	-0.00075845	-0.00075845	-0.000227513	-0.000227513	0.00151183
	3.65	-0.164848	0.895651	-108.777	-108.217	-108.215	-108.215	-108.215	-108.215	-108.213	-108.777	-108.257	-108.255	-108.255	-108.254	-108.254	-108.252	-108.777	-108.348	-108.346	-108.346	-108.346	-108.346	-108.344		3.66	-0.562001	-0.00203779	-0.000269042	-0.000269042	0.000245643	0.000245643	0.00201552	-0.522918	-0.00282659	-0.000816375	-0.000816375	-0.000269103	-0.000269103	0.00154411	-0.431313	-0.00279565	-0.000790277	-0.000790277	-0.000246497	-0.000246497	0.00152378
	3.64	-0.164684	0.894689	-108.777	-108.217	-108.215	-108.215	-108.215	-108.215	-108.213	-108.777	-108.257	-108.255	-108.255	-108.254	-108.254	-108.252	-108.777	-108.348	-108.346	-108.346	-108.346	-108.346	-108.344		3.65	-0.561998	-0.00208741	-0.000288041	-0.000288041	0.000239196	0.000239196	0.00204265	-0.522915	-0.00289545	-0.000849797	-0.000849797	-0.000289288	-0.000289288	0.00155692	-0.431309	-0.00286407	-0.000822895	-0.000822895	-0.000265987	-0.000265987	0.00153566
	3.63	-0.164517	0.893725	-108.777	-108.217	-108.215	-108.215	-108.215	-108.215	-108.213	-108.777	-108.257	-108.255	-108.255	-108.254	-108.254	-108.252	-108.777	-108.349	-108.346	-108.346	-108.346	-108.346	-108.344		3.64	-0.561995	-0.00213796	-0.0003076	-0.0003076	0.000232473	0.000232473	0.00207014	-0.522911	-0.00296565	-0.000884047	-0.000884047	-0.000310007	-0.000310007	0.00156968	-0.431306	-0.00293384	-0.000856321	-0.000856321	-0.000285996	-0.000285996	0.00154746
	3.62	-0.164347	0.892758	-108.777	-108.217	-108.215	-108.215	-108.215	-108.215	-108.213	-108.777	-108.257	-108.255	-108.255	-108.254	-108.254	-108.252	-108.777	-108.349	-108.346	-108.346	-108.346	-108.346	-108.344		3.63	-0.561991	-0.00218944	-0.000327735	-0.000327735	0.000225462	0.000225462	0.00209797	-0.522908	-0.00303722	-0.000919145	-0.000919145	-0.000331276	-0.000331276	0.00158239	-0.431302	-0.00300498	-0.000890578	-0.000890578	-0.00030654	-0.00030654	0.00155917
	3.61	-0.164174	0.891791	-108.777	-108.217	-108.215	-108.215	-108.215	-108.215	-108.213	-108.777	-108.257	-108.255	-108.255	-108.254	-108.254	-108.252	-108.777	-108.349	-108.346	-108.346	-108.346	-108.346	-108.344		3.62	-0.561987	-0.00224189	-0.000348465	-0.000348465	0.000218152	0.000218152	0.00212615	-0.522904	-0.00311017	-0.000955113	-0.000955113	-0.00035311	-0.00035311	0.00159504	-0.431298	-0.00307751	-0.000925686	-0.000925686	-0.000327633	-0.000327633	0.00157077
	3.6	-0.163999	0.890823	-108.777	-108.217	-108.215	-108.215	-108.215	-108.215	-108.213	-108.777	-108.257	-108.255	-108.255	-108.254	-108.254	-108.252	-108.777	-108.349	-108.347	-108.347	-108.346	-108.346	-108.344		3.61	-0.561983	-0.0022953	-0.000369806	-0.000369806	0.000210532	0.000210532	0.00215468	-0.5229	-0.00318454	-0.000991972	-0.000991972	-0.000375524	-0.000375524	0.00160762	-0.431294	-0.00315147	-0.000961667	-0.000961667	-0.000349291	-0.000349291	0.00158227
	3.59	-0.163821	0.889854	-108.777	-108.217	-108.215	-108.215	-108.215	-108.215	-108.213	-108.777	-108.257	-108.255	-108.255	-108.254	-108.254	-108.252	-108.777	-108.349	-108.347	-108.347	-108.346	-108.346	-108.344		3.6	-0.561978	-0.0023497	-0.000391779	-0.000391779	0.000202591	0.000202591	0.00218356	-0.522895	-0.00326035	-0.00102975	-0.00102975	-0.000398535	-0.000398535	0.0016201	-0.43129	-0.00322688	-0.000998543	-0.000998543	-0.000371529	-0.000371529	0.00159364
	3.58	-0.16364	0.888885	-108.777	-108.217	-108.215	-108.215	-108.215	-108.215	-108.213	-108.777	-108.257	-108.255	-108.255	-108.254	-108.254	-108.252	-108.777	-108.349	-108.347	-108.347	-108.346	-108.346	-108.344		3.59	-0.561974	-0.0024051	-0.000414401	-0.000414401	0.000194314	0.000194314	0.0022128	-0.52289	-0.00333763	-0.00106846	-0.00106846	-0.000422159	-0.000422159	0.0016325	-0.431285	-0.00330377	-0.00103634	-0.00103634	-0.000394363	-0.000394363	0.00160487
	3.57	-0.163457	0.887917	-108.777	-108.217	-108.215	-108.215	-108.215	-108.215	-108.213	-108.777	-108.257	-108.255	-108.255	-108.254	-108.254	-108.252	-108.777	-108.349	-108.347	-108.347	-108.346	-108.346	-108.344		3.58	-0.561969	-0.00246153	-0.000437693	-0.000437693	0.00018569	0.00018569	0.0022424	-0.522885	-0.00341641	-0.00110813	-0.00110813	-0.000446414	-0.000446414	0.00164478	-0.43128	-0.00338217	-0.00107507	-0.00107507	-0.00041781	-0.00041781	0.00161596
	3.56	-0.163271	0.88695	-108.777	-108.217	-108.215	-108.215	-108.215	-108.215	-108.213	-108.777	-108.257	-108.255	-108.255	-108.254	-108.254	-108.252	-108.777	-108.349	-108.347	-108.347	-108.346	-108.346	-108.344		3.57	-0.561963	-0.00251899	-0.000461676	-0.000461676	0.000176705	0.000176705	0.00227236	-0.52288	-0.00349671	-0.0011488	-0.0011488	-0.000471321	-0.000471321	0.00165694	-0.431275	-0.00346211	-0.00111477	-0.00111477	-0.000441887	-0.000441887	0.00162688
	3.55	-0.163081	0.885984	-108.777	-108.217	-108.215	-108.215	-108.215	-108.215	-108.212	-108.777	-108.258	-108.255	-108.255	-108.254	-108.254	-108.252	-108.777	-108.349	-108.347	-108.347	-108.346	-108.346	-108.344		3.56	-0.561958	-0.00257751	-0.000486369	-0.000486369	0.000167345	0.000167345	0.00230267	-0.522874	-0.00357857	-0.00119047	-0.00119047	-0.000496891	-0.000496891	0.00166898	-0.431269	-0.00354361	-0.00115546	-0.00115546	-0.000466612	-0.000466612	0.00163763
	3.54	-0.162889	0.88502	-108.777	-108.218	-108.215	-108.215	-108.215	-108.215	-108.212	-108.777	-108.258	-108.255	-108.255	-108.254	-108.254	-108.252	-108.777	-108.349	-108.347	-108.347	-108.346	-108.346	-108.344		3.55	-0.561952	-0.0026371	-0.000511795	-0.000511795	0.000157596	0.000157596	0.00233335	-0.522869	-0.00366201	-0.00123317	-0.00123317	-0.000523145	-0.000523145	0.00168086	-0.431263	-0.00362672	-0.00119716	-0.00119716	-0.000492003	-0.000492003	0.00164818
	3.53	-0.162694	0.884059	-108.777	-108.218	-108.215	-108.215	-108.215	-108.215	-108.212	-108.777	-108.258	-108.255	-108.255	-108.254	-108.254	-108.252	-108.777	-108.349	-108.347	-108.347	-108.346	-108.346	-108.344		3.54	-0.561945	-0.00269779	-0.000537977	-0.000537977	0.000147442	0.000147442	0.00236439	-0.522862	-0.00374706	-0.00127694	-0.00127694	-0.000550103	-0.000550103	0.00169258	-0.431257	-0.00371145	-0.0012399	-0.0012399	-0.000518078	-0.000518078	0.00165854
	3.52	-0.162495	0.883101	-108.777	-108.218	-108.215	-108.215	-108.215	-108.215	-108.212	-108.777	-108.258	-108.255	-108.255	-108.255	-108.255	-108.252	-108.777	-108.349	-108.347	-108.347	-108.346	-108.346	-108.344		3.53	-0.561939	-0.00275958	-0.000564937	-0.000564937	0.000136869	0.000136869	0.00239579	-0.522856	-0.00383376	-0.00132181	-0.00132181	-0.000577785	-0.000577785	0.00170413	-0.43125	-0.00379783	-0.00128371	-0.00128371	-0.000544855	-0.000544855	0.00166867
	3.51	-0.162294	0.882147	-108.777	-108.218	-108.215	-108.215	-108.215	-108.215	-108.212	-108.777	-108.258	-108.255	-108.255	-108.255	-108.255	-108.252	-108.777	-108.349	-108.347	-108.347	-108.346	-108.346	-108.344		3.52	-0.561932	-0.00282249	-0.000592699	-0.000592699	0.00012586	0.00012586	0.00242755	-0.522849	-0.00392214	-0.00136779	-0.00136779	-0.000606212	-0.000606212	0.00171549	-0.431243	-0.00388591	-0.00132861	-0.00132861	-0.000572356	-0.000572356	0.00167856
	3.5	-0.162089	0.881197	-108.777	-108.218	-108.215	-108.215	-108.215	-108.215	-108.212	-108.777	-108.258	-108.255	-108.255	-108.255	-108.255	-108.252	-108.777	-108.35	-108.347	-108.347	-108.346	-108.346	-108.344		3.51	-0.561924	-0.00288656	-0.000621288	-0.000621288	0.000114398	0.000114398	0.00245967	-0.522841	-0.00401222	-0.00141491	-0.00141491	-0.000635403	-0.000635403	0.00172664	-0.431236	-0.00397571	-0.00137464	-0.00137464	-0.000600599	-0.000600599	0.00168821
	3.49	-0.161882	0.880252	-108.777	-108.218	-108.215	-108.215	-108.215	-108.215	-108.212	-108.777	-108.258	-108.255	-108.255	-108.255	-108.255	-108.252	-108.777	-108.35	-108.347	-108.347	-108.346	-108.346	-108.344		3.5	-0.561917	-0.00295178	-0.000650729	-0.000650729	0.000102468	0.000102468	0.00249216	-0.522833	-0.00410404	-0.00146322	-0.00146322	-0.000665381	-0.000665381	0.00173757	-0.431228	-0.00406726	-0.00142181	-0.00142181	-0.000629605	-0.000629605	0.00169758
	3.48	-0.161671	0.879312	-108.777	-108.218	-108.216	-108.216	-108.215	-108.215	-108.212	-108.777	-108.258	-108.255	-108.255	-108.255	-108.255	-108.252	-108.777	-108.35	-108.347	-108.347	-108.346	-108.346	-108.344		3.49	-0.561908	-0.0030182	-0.000681047	-0.000681047	9.00502e-05	9.00502e-05	0.002525	-0.522825	-0.00419763	-0.00151272	-0.00151272	-0.000696166	-0.000696166	0.00174826	-0.43122	-0.00416061	-0.00147016	-0.00147016	-0.000659395	-0.000659395	0.00170666
	3.47	-0.161456	0.878379	-108.777	-108.218	-108.216	-108.216	-108.215	-108.215	-108.212	-108.777	-108.258	-108.256	-108.256	-108.255	-108.255	-108.252	-108.777	-108.35	-108.347	-108.347	-108.346	-108.346	-108.344		3.48	-0.5619	-0.00308581	-0.000712271	-0.000712271	7.71273e-05	7.71273e-05	0.00255821	-0.522817	-0.00429302	-0.00156347	-0.00156347	-0.000727783	-0.000727783	0.00175868	-0.431211	-0.00425577	-0.00151972	-0.00151972	-0.000689992	-0.000689992	0.00171544
	3.46	-0.161239	0.877451	-108.777	-108.218	-108.216	-108.216	-108.215	-108.215	-108.212	-108.777	-108.258	-108.256	-108.256	-108.255	-108.255	-108.252	-108.777	-108.35	-108.347	-108.347	-108.346	-108.346	-108.344		3.47	-0.561891	-0.00315464	-0.000744427	-0.000744427	6.36803e-05	6.36803e-05	0.00259177	-0.522808	-0.00439025	-0.00161549	-0.00161549	-0.000760254	-0.000760254	0.00176884	-0.431202	-0.00435279	-0.00157052	-0.00157052	-0.000721416	-0.000721416	0.00172389
	3.45	-0.161018	0.876532	-108.777	-108.218	-108.216	-108.216	-108.215	-108.215	-108.212	-108.777	-108.258	-108.256	-108.256	-108.255	-108.255	-108.252	-108.777	-108.35	-108.347	-108.347	-108.346	-108.346	-108.344		3.46	-0.561881	-0.00322472	-0.000777543	-0.000777543	4.96895e-05	4.96895e-05	0.00262569	-0.522798	-0.00448935	-0.0016688	-0.0016688	-0.000793603	-0.000793603	0.00177869	-0.431193	-0.0044517	-0.00162259	-0.00162259	-0.000753692	-0.000753692	0.00173199
	3.44	-0.160793	0.87562	-108.777	-108.218	-108.216	-108.216	-108.215	-108.215	-108.212	-108.777	-108.259	-108.256	-108.256	-108.255	-108.255	-108.252	-108.777	-108.35	-108.347	-108.347	-108.346	-108.346	-108.344		3.45	-0.561871	-0.00329606	-0.00081165	-0.00081165	3.51351e-05	3.51351e-05	0.00265996	-0.522788	-0.00459035	-0.00172345	-0.00172345	-0.000827854	-0.000827854	0.00178823	-0.431183	-0.00455253	-0.00167596	-0.00167596	-0.000786842	-0.000786842	0.00173973
	3.43	-0.160565	0.874716	-108.777	-108.218	-108.216	-108.216	-108.215	-108.215	-108.212	-108.777	-108.259	-108.256	-108.256	-108.255	-108.255	-108.252	-108.777	-108.35	-108.347	-108.347	-108.346	-108.346	-108.344		3.44	-0.561861	-0.00336869	-0.000846777	-0.000846777	1.9996e-05	1.9996e-05	0.00269458	-0.522777	-0.0046933	-0.00177947	-0.00177947	-0.000863034	-0.000863034	0.00179743	-0.431172	-0.00465533	-0.00173066	-0.00173066	-0.00082089	-0.00082089	0.00174707
	3.42	-0.160334	0.873822	-108.777	-108.218	-108.216	-108.216	-108.215	-108.215	-108.212	-108.777	-108.259	-108.256	-108.256	-108.255	-108.255	-108.252	-108.777	-108.35	-108.347	-108.347	-108.346	-108.346	-108.344		3.43	-0.56185	-0.00344261	-0.000882955	-0.000882955	4.2509e-06	4.2509e-06	0.00272956	-0.522766	-0.00479822	-0.00183689	-0.00183689	-0.000899166	-0.000899166	0.00180626	-0.431161	-0.00476012	-0.00178674	-0.00178674	-0.000855861	-0.000855861	0.001754
	3.41	-0.160098	0.872937	-108.777	-108.218	-108.216	-108.216	-108.215	-108.215	-108.212	-108.777	-108.259	-108.256	-108.256	-108.255	-108.255	-108.252	-108.777	-108.35	-108.347	-108.347	-108.346	-108.346	-108.344		3.42	-0.561838	-0.00351787	-0.000920216	-0.000920216	-1.21222e-05	-1.21222e-05	0.00276487	-0.522755	-0.00490515	-0.00189575	-0.00189575	-0.000936279	-0.000936279	0.00181471	-0.431149	-0.00486695	-0.00184422	-0.00184422	-0.000891781	-0.000891781	0.0017605
	3.4	-0.15986	0.872063	-108.777	-108.218	-108.216	-108.216	-108.215	-108.215	-108.212	-108.777	-108.259	-108.256	-108.256	-108.255	-108.255	-108.252	-108.777	-108.351	-108.347	-108.347	-108.346	-108.346	-108.344		3.41	-0.561826	-0.00359446	-0.000958594	-0.000958594	-2.91463e-05	-2.91463e-05	0.00280053	-0.522743	-0.00501413	-0.00195609	-0.00195609	-0.000974399	-0.000974399	0.00182276	-0.431137	-0.00497585	-0.00190314	-0.00190314	-0.000928674	-0.000928674	0.00176654
	3.39	-0.159617	0.8712	-108.777	-108.219	-108.216	-108.216	-108.215	-108.215	-108.212	-108.777	-108.259	-108.256	-108.256	-108.255	-108.255	-108.252	-108.777	-108.351	-108.348	-108.348	-108.347	-108.347	-108.344		3.4	-0.561813	-0.00367243	-0.000998121	-0.000998121	-4.68447e-05	-4.68447e-05	0.00283652	-0.52273	-0.00512519	-0.00201794	-0.00201794	-0.00101355	-0.00101355	0.00183037	-0.431125	-0.00508686	-0.00196353	-0.00196353	-0.000966568	-0.000966568	0.00177209
	3.38	-0.159371	0.870349	-108.777	-108.219	-108.216	-108.216	-108.215	-108.215	-108.212	-108.777	-108.259	-108.256	-108.256	-108.255	-108.255	-108.252	-108.777	-108.351	-108.348	-108.348	-108.347	-108.347	-108.344		3.39	-0.5618	-0.00375179	-0.00103883	-0.00103883	-6.52418e-05	-6.52418e-05	0.00287285	-0.522717	-0.00523838	-0.00208135	-0.00208135	-0.00105377	-0.00105377	0.00183752	-0.431111	-0.00520002	-0.00202544	-0.00202544	-0.00100549	-0.00100549	0.00177713
	3.37	-0.159121	0.86951	-108.777	-108.219	-108.216	-108.216	-108.215	-108.215	-108.212	-108.777	-108.259	-108.256	-108.256	-108.255	-108.255	-108.252	-108.777	-108.351	-108.348	-108.348	-108.347	-108.347	-108.344		3.38	-0.561786	-0.00383255	-0.00108076	-0.00108076	-8.43623e-05	-8.43623e-05	0.00290949	-0.522703	-0.00535373	-0.00214634	-0.00214634	-0.00109509	-0.00109509	0.00184418	-0.431097	-0.00531537	-0.00208889	-0.00208889	-0.00104547	-0.00104547	0.00178163
	3.36	-0.158867	0.868685	-108.777	-108.219	-108.216	-108.216	-108.215	-108.215	-108.212	-108.777	-108.259	-108.256	-108.256	-108.255	-108.255	-108.252	-108.777	-108.351	-108.348	-108.348	-108.347	-108.347	-108.344		3.37	-0.561771	-0.00391475	-0.00112395	-0.00112395	-0.000104232	-0.000104232	0.00294646	-0.522688	-0.00547128	-0.00221297	-0.00221297	-0.00113752	-0.00113752	0.00185033	-0.431083	-0.00543294	-0.00215394	-0.00215394	-0.00108653	-0.00108653	0.00178556
	3.35	-0.158609	0.867873	-108.777	-108.219	-108.216	-108.216	-108.215	-108.215	-108.212	-108.777	-108.26	-108.256	-108.256	-108.255	-108.255	-108.252	-108.777	-108.351	-108.348	-108.348	-108.347	-108.347	-108.344		3.36	-0.561756	-0.00399841	-0.00116843	-0.00116843	-0.000124877	-0.000124877	0.00298373	-0.522673	-0.00559107	-0.00228127	-0.00228127	-0.00118111	-0.00118111	0.00185594	-0.431067	-0.00555278	-0.00222061	-0.00222061	-0.0011287	-0.0011287	0.0017889
	3.34	-0.158346	0.867076	-108.777	-108.219	-108.216	-108.216	-108.215	-108.215	-108.212	-108.777	-108.26	-108.256	-108.256	-108.255	-108.255	-108.252	-108.777	-108.351	-108.348	-108.348	-108.347	-108.347	-108.344		3.35	-0.56174	-0.00408355	-0.00121425	-0.00121425	-0.000146325	-0.000146325	0.00302131	-0.522657	-0.00571313	-0.00235128	-0.00235128	-0.00122589	-0.00122589	0.00186098	-0.431051	-0.00567492	-0.00228896	-0.00228896	-0.00117202	-0.00117202	0.00179162
	3.33	-0.15808	0.866295	-108.777	-108.219	-108.216	-108.216	-108.215	-108.215	-108.212	-108.777	-108.26	-108.256	-108.256	-108.255	-108.255	-108.252	-108.777	-108.351	-108.348	-108.348	-108.347	-108.347	-108.344		3.34	-0.561723	-0.00417019	-0.00126143	-0.00126143	-0.000168603	-0.000168603	0.00305919	-0.52264	-0.00583752	-0.00242306	-0.00242306	-0.00127188	-0.00127188	0.00186541	-0.431035	-0.00579942	-0.00235901	-0.00235901	-0.00121651	-0.00121651	0.00179368
	3.32	-0.15781	0.86553	-108.777	-108.219	-108.216	-108.216	-108.215	-108.215	-108.212	-108.777	-108.26	-108.256	-108.256	-108.255	-108.255	-108.252	-108.777	-108.352	-108.348	-108.348	-108.347	-108.347	-108.344		3.33	-0.561706	-0.00425836	-0.00131003	-0.00131003	-0.000191741	-0.000191741	0.00309735	-0.522622	-0.00596427	-0.00249664	-0.00249664	-0.00131913	-0.00131913	0.0018692	-0.431017	-0.0059263	-0.00243082	-0.00243082	-0.00126221	-0.00126221	0.00179504
	3.31	-0.157536	0.864781	-108.776	-108.219	-108.216	-108.216	-108.215	-108.215	-108.212	-108.776	-108.26	-108.257	-108.257	-108.255	-108.255	-108.252	-108.776	-108.352	-108.348	-108.348	-108.347	-108.347	-108.344		3.32	-0.561687	-0.00434808	-0.00136009	-0.00136009	-0.000215767	-0.000215767	0.00313579	-0.522604	-0.00609343	-0.00257206	-0.00257206	-0.00136766	-0.00136766	0.00187233	-0.430999	-0.00605562	-0.00250442	-0.00250442	-0.00130914	-0.00130914	0.00179569
	3.3	-0.157257	0.864051	-108.776	-108.219	-108.216	-108.216	-108.215	-108.215	-108.212	-108.776	-108.26	-108.257	-108.257	-108.255	-108.255	-108.252	-108.776	-108.352	-108.348	-108.348	-108.347	-108.347	-108.344		3.31	-0.561668	-0.00443938	-0.00141164	-0.00141164	-0.000240711	-0.000240711	0.00317449	-0.522585	-0.00622502	-0.00264939	-0.00264939	-0.00141751	-0.00141751	0.00187475	-0.43098	-0.0061874	-0.00257986	-0.00257986	-0.00135734	-0.00135734	0.00179558
	3.29	-0.156974	0.863338	-108.776	-108.219	-108.216	-108.216	-108.215	-108.215	-108.212	-108.776	-108.26	-108.257	-108.257	-108.255	-108.255	-108.252	-108.776	-108.352	-108.348	-108.348	-108.347	-108.347	-108.344		3.3	-0.561648	-0.00453227	-0.00146474	-0.00146474	-0.000266606	-0.000266606	0.00321344	-0.522565	-0.00635911	-0.00272865	-0.00272865	-0.00146872	-0.00146872	0.00187643	-0.43096	-0.00632171	-0.0026572	-0.0026572	-0.00140684	-0.00140684	0.00179468
	3.28	-0.156686	0.862645	-108.776	-108.22	-108.216	-108.216	-108.215	-108.215	-108.212	-108.776	-108.261	-108.257	-108.257	-108.255	-108.255	-108.252	-108.776	-108.352	-108.348	-108.348	-108.347	-108.347	-108.344		3.29	-0.561628	-0.00462678	-0.00151942	-0.00151942	-0.000293482	-0.000293482	0.00325264	-0.522544	-0.00649572	-0.00280991	-0.00280991	-0.00152132	-0.00152132	0.00187733	-0.430939	-0.00645858	-0.00273646	-0.00273646	-0.00145768	-0.00145768	0.00179295
	3.27	-0.156395	0.861971	-108.776	-108.22	-108.216	-108.216	-108.215	-108.215	-108.211	-108.776	-108.261	-108.257	-108.257	-108.256	-108.256	-108.252	-108.776	-108.352	-108.348	-108.348	-108.347	-108.347	-108.344		3.28	-0.561606	-0.00472295	-0.00157573	-0.00157573	-0.000321372	-0.000321372	0.00329207	-0.522523	-0.00663491	-0.00289321	-0.00289321	-0.00157535	-0.00157535	0.00187742	-0.430917	-0.00659805	-0.0028177	-0.0028177	-0.0015099	-0.0015099	0.00179036
	3.26	-0.156098	0.861318	-108.776	-108.22	-108.217	-108.217	-108.215	-108.215	-108.211	-108.776	-108.261	-108.257	-108.257	-108.256	-108.256	-108.252	-108.776	-108.352	-108.348	-108.348	-108.347	-108.347	-108.344		3.27	-0.561583	-0.00482079	-0.00163372	-0.00163372	-0.00035031	-0.00035031	0.00333171	-0.5225	-0.00677671	-0.00297861	-0.00297861	-0.00163084	-0.00163084	0.00187665	-0.430895	-0.00674018	-0.00290097	-0.00290097	-0.00156351	-0.00156351	0.00178686
	3.25	-0.155797	0.860687	-108.776	-108.22	-108.217	-108.217	-108.215	-108.215	-108.211	-108.776	-108.261	-108.257	-108.257	-108.256	-108.256	-108.252	-108.776	-108.353	-108.349	-108.349	-108.347	-108.347	-108.344		3.26	-0.56156	-0.00492032	-0.00169344	-0.00169344	-0.000380329	-0.000380329	0.00337155	-0.522477	-0.00692118	-0.00306614	-0.00306614	-0.00168785	-0.00168785	0.00187498	-0.430871	-0.00688499	-0.00298632	-0.00298632	-0.00161858	-0.00161858	0.00178241
	3.24	-0.155491	0.860077	-108.776	-108.22	-108.217	-108.217	-108.215	-108.215	-108.211	-108.776	-108.261	-108.257	-108.257	-108.256	-108.256	-108.252	-108.776	-108.353	-108.349	-108.349	-108.347	-108.347	-108.344		3.25	-0.561535	-0.00502158	-0.00175494	-0.00175494	-0.000411465	-0.000411465	0.00341158	-0.522452	-0.00706835	-0.00315588	-0.00315588	-0.0017464	-0.0017464	0.00187238	-0.430847	-0.00703255	-0.0030738	-0.0030738	-0.00167512	-0.00167512	0.00177698
	3.23	-0.155181	0.859491	-108.776	-108.22	-108.217	-108.217	-108.215	-108.215	-108.211	-108.776	-108.261	-108.257	-108.257	-108.256	-108.256	-108.252	-108.776	-108.353	-108.349	-108.349	-108.347	-108.347	-108.344		3.24	-0.56151	-0.00512459	-0.00181827	-0.00181827	-0.000443754	-0.000443754	0.00345178	-0.522427	-0.00721828	-0.00324786	-0.00324786	-0.00180654	-0.00180654	0.00186879	-0.430821	-0.0071829	-0.00316345	-0.00316345	-0.00173318	-0.00173318	0.00177053
	3.22	-0.154865	0.858928	-108.776	-108.22	-108.217	-108.217	-108.215	-108.215	-108.211	-108.776	-108.261	-108.257	-108.257	-108.256	-108.256	-108.252	-108.776	-108.353	-108.349	-108.349	-108.347	-108.347	-108.344		3.23	-0.561483	-0.00522938	-0.00188348	-0.00188348	-0.000477231	-0.000477231	0.00349212	-0.5224	-0.00737101	-0.00334216	-0.00334216	-0.0018683	-0.0018683	0.00186417	-0.430795	-0.00733608	-0.00325534	-0.00325534	-0.00179279	-0.00179279	0.001763
	3.21	-0.154545	0.85839	-108.776	-108.22	-108.217	-108.217	-108.215	-108.215	-108.211	-108.776	-108.262	-108.257	-108.257	-108.256	-108.256	-108.252	-108.776	-108.353	-108.349	-108.349	-108.347	-108.347	-108.344		3.22	-0.561456	-0.00533597	-0.00195061	-0.00195061	-0.000511934	-0.000511934	0.0035326	-0.522372	-0.00752658	-0.00343881	-0.00343881	-0.00193174	-0.00193174	0.00185848	-0.430767	-0.00749213	-0.00334951	-0.00334951	-0.00185401	-0.00185401	0.00175435
	3.2	-0.15422	0.857877	-108.776	-108.22	-108.217	-108.217	-108.215	-108.215	-108.211	-108.776	-108.262	-108.258	-108.258	-108.256	-108.256	-108.252	-108.776	-108.353	-108.349	-108.349	-108.347	-108.347	-108.344		3.21	-0.561427	-0.00544439	-0.00201974	-0.00201974	-0.000547903	-0.000547903	0.00357319	-0.522343	-0.00768505	-0.00353789	-0.00353789	-0.00199689	-0.00199689	0.00185167	-0.430738	-0.00765112	-0.00344603	-0.00344603	-0.00191685	-0.00191685	0.00174453
	3.19	-0.15389	0.85739	-108.776	-108.22	-108.217	-108.217	-108.215	-108.215	-108.211	-108.776	-108.262	-108.258	-108.258	-108.256	-108.256	-108.252	-108.776	-108.353	-108.349	-108.349	-108.348	-108.348	-108.344		3.2	-0.561397	-0.00555466	-0.00209091	-0.00209091	-0.000585174	-0.000585174	0.00361388	-0.522313	-0.00784646	-0.00363944	-0.00363944	-0.0020638	-0.0020638	0.00184368	-0.430708	-0.00781308	-0.00354493	-0.00354493	-0.00198138	-0.00198138	0.00173351
	3.18	-0.153555	0.856929	-108.776	-108.221	-108.217	-108.217	-108.215	-108.215	-108.211	-108.776	-108.262	-108.258	-108.258	-108.256	-108.256	-108.252	-108.776	-108.354	-108.349	-108.349	-108.348	-108.348	-108.344		3.19	-0.561365	-0.00566681	-0.00216418	-0.00216418	-0.000623789	-0.000623789	0.00365463	-0.522282	-0.00801085	-0.00374354	-0.00374354	-0.00213251	-0.00213251	0.00183447	-0.430677	-0.00797806	-0.00364629	-0.00364629	-0.00204762	-0.00204762	0.00172122
	3.17	-0.153214	0.856497	-108.776	-108.221	-108.217	-108.217	-108.216	-108.216	-108.211	-108.776	-108.262	-108.258	-108.258	-108.256	-108.256	-108.252	-108.776	-108.354	-108.349	-108.349	-108.348	-108.348	-108.344		3.18	-0.561333	-0.00578087	-0.0022396	-0.0022396	-0.000663787	-0.000663787	0.00369544	-0.52225	-0.00817828	-0.00385023	-0.00385023	-0.00220307	-0.00220307	0.00182399	-0.430644	-0.0081461	-0.00375016	-0.00375016	-0.00211562	-0.00211562	0.00170763
	3.16	-0.152868	0.856093	-108.776	-108.221	-108.217	-108.217	-108.216	-108.216	-108.211	-108.776	-108.262	-108.258	-108.258	-108.256	-108.256	-108.252	-108.776	-108.354	-108.349	-108.349	-108.348	-108.348	-108.344		3.17	-0.561299	-0.00589687	-0.00231724	-0.00231724	-0.000705211	-0.000705211	0.00373627	-0.522216	-0.0083488	-0.00395959	-0.00395959	-0.00227553	-0.00227553	0.00181217	-0.43061	-0.00831727	-0.00385659	-0.00385659	-0.00218542	-0.00218542	0.00169267
	3.15	-0.152517	0.855718	-108.776	-108.221	-108.217	-108.217	-108.216	-108.216	-108.211	-108.776	-108.263	-108.258	-108.258	-108.256	-108.256	-108.252	-108.776	-108.354	-108.35	-108.35	-108.348	-108.348	-108.344		3.16	-0.561264	-0.00601483	-0.00239716	-0.00239716	-0.000748102	-0.000748102	0.00377709	-0.522181	-0.00852245	-0.00407167	-0.00407167	-0.00234992	-0.00234992	0.00179898	-0.430575	-0.00849161	-0.00396566	-0.00396566	-0.00225706	-0.00225706	0.0016763
	3.14	-0.152161	0.855373	-108.776	-108.221	-108.217	-108.217	-108.216	-108.216	-108.211	-108.776	-108.263	-108.258	-108.258	-108.256	-108.256	-108.252	-108.776	-108.354	-108.35	-108.35	-108.348	-108.348	-108.344		3.15	-0.561227	-0.00613479	-0.00247941	-0.00247941	-0.000792502	-0.000792502	0.0038179	-0.522144	-0.00869929	-0.00418655	-0.00418655	-0.00242631	-0.00242631	0.00178434	-0.430539	-0.00866917	-0.00407741	-0.00407741	-0.0023306	-0.0023306	0.00165846
	3.13	-0.151799	0.855058	-108.776	-108.221	-108.217	-108.217	-108.216	-108.216	-108.211	-108.776	-108.263	-108.258	-108.258	-108.256	-108.256	-108.252	-108.776	-108.355	-108.35	-108.35	-108.348	-108.348	-108.344		3.14	-0.561189	-0.00625676	-0.00256406	-0.00256406	-0.000838457	-0.000838457	0.00385865	-0.522106	-0.00887937	-0.00430428	-0.00430428	-0.00250474	-0.00250474	0.0017682	-0.430501	-0.00884999	-0.00419191	-0.00419191	-0.00240607	-0.00240607	0.00163909
	3.12	-0.151431	0.854776	-108.776	-108.221	-108.218	-108.218	-108.216	-108.216	-108.211	-108.776	-108.263	-108.258	-108.258	-108.257	-108.257	-108.252	-108.776	-108.355	-108.35	-108.35	-108.348	-108.348	-108.344		3.13	-0.56115	-0.00638077	-0.00265117	-0.00265117	-0.000886009	-0.000886009	0.00389932	-0.522067	-0.00906272	-0.00442493	-0.00442493	-0.00258525	-0.00258525	0.0017505	-0.430461	-0.00903414	-0.00430922	-0.00430922	-0.00248352	-0.00248352	0.00161813
	3.11	-0.151058	0.854525	-108.776	-108.221	-108.218	-108.218	-108.216	-108.216	-108.211	-108.776	-108.263	-108.259	-108.259	-108.257	-108.257	-108.252	-108.776	-108.355	-108.35	-108.35	-108.348	-108.348	-108.344		3.12	-0.561109	-0.00650686	-0.00274081	-0.00274081	-0.000935204	-0.000935204	0.00393987	-0.522025	-0.00924942	-0.00454857	-0.00454857	-0.0026679	-0.0026679	0.00173118	-0.43042	-0.00922165	-0.00442941	-0.00442941	-0.002563	-0.002563	0.00159554
	3.1	-0.150678	0.854308	-108.776	-108.222	-108.218	-108.218	-108.216	-108.216	-108.211	-108.776	-108.264	-108.259	-108.259	-108.257	-108.257	-108.252	-108.776	-108.355	-108.35	-108.35	-108.348	-108.348	-108.344		3.11	-0.561066	-0.00663505	-0.00283305	-0.00283305	-0.000986087	-0.000986087	0.00398029	-0.521983	-0.0094395	-0.00467527	-0.00467527	-0.00275275	-0.00275275	0.00171018	-0.430377	-0.00941258	-0.00455254	-0.00455254	-0.00264455	-0.00264455	0.00157125
	3.09	-0.150294	0.854124	-108.776	-108.222	-108.218	-108.218	-108.216	-108.216	-108.211	-108.776	-108.264	-108.259	-108.259	-108.257	-108.257	-108.252	-108.776	-108.355	-108.35	-108.35	-108.348	-108.348	-108.344		3.1	-0.561022	-0.00676537	-0.00292794	-0.00292794	-0.00103871	-0.00103871	0.00402054	-0.521939	-0.00963303	-0.0048051	-0.0048051	-0.00283983	-0.00283983	0.00168744	-0.430333	-0.00960698	-0.00467868	-0.00467868	-0.00272822	-0.00272822	0.00154519
	3.08	-0.149903	0.853975	-108.776	-108.222	-108.218	-108.218	-108.216	-108.216	-108.211	-108.776	-108.264	-108.259	-108.259	-108.257	-108.257	-108.252	-108.776	-108.356	-108.35	-108.35	-108.348	-108.348	-108.344		3.09	-0.560976	-0.00689785	-0.00302557	-0.00302557	-0.00109311	-0.00109311	0.00406058	-0.521893	-0.00983004	-0.00493814	-0.00493814	-0.00292921	-0.00292921	0.00166287	-0.430287	-0.00980491	-0.0048079	-0.0048079	-0.00281406	-0.00281406	0.00151732
	3.07	-0.149506	0.853861	-108.776	-108.222	-108.218	-108.218	-108.216	-108.216	-108.211	-108.776	-108.264	-108.259	-108.259	-108.257	-108.257	-108.252	-108.776	-108.356	-108.351	-108.351	-108.348	-108.348	-108.344		3.08	-0.560928	-0.00703252	-0.00312599	-0.00312599	-0.00114934	-0.00114934	0.00410039	-0.521845	-0.0100306	-0.00507444	-0.00507444	-0.00302094	-0.00302094	0.00163643	-0.430239	-0.0100064	-0.00494026	-0.00494026	-0.00290211	-0.00290211	0.00148755
	3.06	-0.149103	0.853784	-108.776	-108.222	-108.218	-108.218	-108.216	-108.216	-108.211	-108.776	-108.264	-108.259	-108.259	-108.257	-108.257	-108.252	-108.776	-108.356	-108.351	-108.351	-108.349	-108.349	-108.344		3.07	-0.560878	-0.00716939	-0.00322928	-0.00322928	-0.00120744	-0.00120744	0.00413992	-0.521795	-0.0102348	-0.0052141	-0.0052141	-0.00311507	-0.00311507	0.00160803	-0.43019	-0.0102115	-0.00507583	-0.00507583	-0.00299243	-0.00299243	0.00145584
	3.05	-0.148694	0.853743	-108.776	-108.222	-108.218	-108.218	-108.216	-108.216	-108.211	-108.776	-108.265	-108.259	-108.259	-108.257	-108.257	-108.252	-108.776	-108.356	-108.351	-108.351	-108.349	-108.349	-108.344		3.06	-0.560827	-0.00730851	-0.00333552	-0.00333552	-0.00126748	-0.00126748	0.00417915	-0.521744	-0.0104426	-0.00535717	-0.00535717	-0.00321166	-0.00321166	0.00157762	-0.430138	-0.0104203	-0.00521468	-0.00521468	-0.00308507	-0.00308507	0.0014221
	3.04	-0.148278	0.85374	-108.776	-108.222	-108.218	-108.218	-108.216	-108.216	-108.211	-108.776	-108.265	-108.26	-108.26	-108.257	-108.257	-108.252	-108.776	-108.356	-108.351	-108.351	-108.349	-108.349	-108.344		3.05	-0.560774	-0.0074499	-0.00344476	-0.00344476	-0.00132949	-0.00132949	0.00421802	-0.52169	-0.0106541	-0.00550375	-0.00550375	-0.00331076	-0.00331076	0.0015451	-0.430085	-0.0106329	-0.00535688	-0.00535688	-0.00318007	-0.00318007	0.00138628
	3.03	-0.147856	0.853776	-108.775	-108.223	-108.218	-108.218	-108.216	-108.216	-108.211	-108.775	-108.265	-108.26	-108.26	-108.257	-108.257	-108.252	-108.775	-108.357	-108.351	-108.351	-108.349	-108.349	-108.344		3.04	-0.560718	-0.00759359	-0.0035571	-0.0035571	-0.00139353	-0.00139353	0.00425652	-0.521635	-0.0108693	-0.0056539	-0.0056539	-0.00341243	-0.00341243	0.00151043	-0.43003	-0.0108492	-0.00550252	-0.00550252	-0.00327749	-0.00327749	0.00134831
	3.02	-0.147428	0.853851	-108.775	-108.223	-108.219	-108.219	-108.216	-108.216	-108.21	-108.775	-108.265	-108.26	-108.26	-108.258	-108.258	-108.252	-108.775	-108.357	-108.351	-108.351	-108.349	-108.349	-108.344		3.03	-0.560661	-0.00773961	-0.0036726	-0.0036726	-0.00145964	-0.00145964	0.00429458	-0.521577	-0.0110884	-0.0058077	-0.0058077	-0.00351672	-0.00351672	0.00147352	-0.429972	-0.0110693	-0.00565164	-0.00565164	-0.00337738	-0.00337738	0.00130812
	3.01	-0.146993	0.853965	-108.775	-108.223	-108.219	-108.219	-108.216	-108.216	-108.21	-108.775	-108.265	-108.26	-108.26	-108.258	-108.258	-108.253	-108.775	-108.357	-108.351	-108.351	-108.349	-108.349	-108.344		3.02	-0.560601	-0.00788798	-0.00379134	-0.00379134	-0.00152788	-0.00152788	0.00433219	-0.521518	-0.0113114	-0.00596523	-0.00596523	-0.00362369	-0.00362369	0.00143429	-0.429912	-0.0112933	-0.00580435	-0.00580435	-0.00347978	-0.00347978	0.00126563
	3	-0.146551	0.85412	-108.775	-108.223	-108.219	-108.219	-108.216	-108.216	-108.21	-108.775	-108.266	-108.26	-108.26	-108.258	-108.258	-108.253	-108.775	-108.357	-108.352	-108.352	-108.349	-108.349	-108.344		3.01	-0.560539	-0.00803874	-0.00391339	-0.00391339	-0.00159831	-0.00159831	0.00436929	-0.521456	-0.0115382	-0.00612657	-0.00612657	-0.0037334	-0.0037334	0.00139266	-0.42985	-0.0115213	-0.00596069	-0.00596069	-0.00358476	-0.00358476	0.00122077
	2.99	-0.146103	0.854317	-108.775	-108.223	-108.219	-108.219	-108.217	-108.217	-108.21	-108.775	-108.266	-108.26	-108.26	-108.258	-108.258	-108.253	-108.775	-108.357	-108.352	-108.352	-108.349	-108.349	-108.344		3	-0.560475	-0.0081919	-0.00403885	-0.00403885	-0.00167096	-0.00167096	0.00440583	-0.521392	-0.0117691	-0.00629181	-0.00629181	-0.00384591	-0.00384591	0.00134857	-0.429786	-0.0117533	-0.00612077	-0.00612077	-0.00369236	-0.00369236	0.00117347
	2.98	-0.145647	0.854555	-108.775	-108.223	-108.219	-108.219	-108.217	-108.217	-108.21	-108.775	-108.266	-108.261	-108.261	-108.258	-108.258	-108.253	-108.775	-108.358	-108.352	-108.352	-108.349	-108.349	-108.344		2.99	-0.560408	-0.00834751	-0.00416777	-0.00416777	-0.00174589	-0.00174589	0.00444179	-0.521325	-0.012004	-0.00646102	-0.00646102	-0.00396127	-0.00396127	0.00130192	-0.42972	-0.0119893	-0.00628464	-0.00628464	-0.00380264	-0.00380264	0.00112366
	2.97	-0.145185	0.854836	-108.775	-108.223	-108.219	-108.219	-108.217	-108.217	-108.21	-108.775	-108.266	-108.261	-108.261	-108.258	-108.258	-108.253	-108.775	-108.358	-108.352	-108.352	-108.35	-108.35	-108.344		2.98	-0.560339	-0.00850559	-0.00430026	-0.00430026	-0.00182317	-0.00182317	0.00447711	-0.521256	-0.0122429	-0.00663429	-0.00663429	-0.00407954	-0.00407954	0.00125264	-0.429651	-0.0122294	-0.00645239	-0.00645239	-0.00391565	-0.00391565	0.00107126
	2.96	-0.144715	0.855161	-108.775	-108.224	-108.219	-108.219	-108.217	-108.217	-108.21	-108.775	-108.267	-108.261	-108.261	-108.258	-108.258	-108.253	-108.775	-108.358	-108.352	-108.352	-108.35	-108.35	-108.345		2.97	-0.560268	-0.00866616	-0.00443638	-0.00443638	-0.00190283	-0.00190283	0.00451174	-0.521184	-0.012486	-0.00681169	-0.00681169	-0.00420079	-0.00420079	0.00120065	-0.429579	-0.0124736	-0.0066241	-0.0066241	-0.00403143	-0.00403143	0.0010162
	2.95	-0.144239	0.85553	-108.775	-108.224	-108.22	-108.22	-108.217	-108.217	-108.21	-108.775	-108.267	-108.261	-108.261	-108.258	-108.258	-108.253	-108.775	-108.358	-108.352	-108.352	-108.35	-108.35	-108.345		2.96	-0.560194	-0.00882926	-0.00457622	-0.00457622	-0.00198493	-0.00198493	0.00454565	-0.52111	-0.0127333	-0.00699333	-0.00699333	-0.00432507	-0.00432507	0.00114585	-0.429505	-0.0127221	-0.00679984	-0.00679984	-0.00415006	-0.00415006	0.000958395
	2.94	-0.143755	0.855944	-108.775	-108.224	-108.22	-108.22	-108.217	-108.217	-108.21	-108.775	-108.267	-108.261	-108.261	-108.258	-108.258	-108.253	-108.775	-108.359	-108.353	-108.353	-108.35	-108.35	-108.345		2.95	-0.560117	-0.00899491	-0.00471987	-0.00471987	-0.00206952	-0.00206952	0.00457877	-0.521033	-0.0129849	-0.00717927	-0.00717927	-0.00445245	-0.00445245	0.00108817	-0.429428	-0.0129748	-0.0069797	-0.0069797	-0.00427158	-0.00427158	0.000897769
	2.93	-0.143264	0.856403	-108.775	-108.224	-108.22	-108.22	-108.217	-108.217	-108.21	-108.775	-108.267	-108.261	-108.261	-108.259	-108.259	-108.253	-108.775	-108.359	-108.353	-108.353	-108.35	-108.35	-108.345		2.94	-0.560037	-0.00916315	-0.00486741	-0.00486741	-0.00215667	-0.00215667	0.00461107	-0.520954	-0.0132407	-0.00736962	-0.00736962	-0.00458297	-0.00458297	0.00102752	-0.429348	-0.0132319	-0.00716376	-0.00716376	-0.00439604	-0.00439604	0.000834246
	2.92	-0.142765	0.856908	-108.775	-108.224	-108.22	-108.22	-108.217	-108.217	-108.21	-108.775	-108.268	-108.262	-108.262	-108.259	-108.259	-108.253	-108.775	-108.359	-108.353	-108.353	-108.35	-108.35	-108.345		2.93	-0.559954	-0.00933399	-0.00501892	-0.00501892	-0.00224642	-0.00224642	0.00464249	-0.520871	-0.013501	-0.00756445	-0.00756445	-0.00471671	-0.00471671	0.000963813	-0.429266	-0.0134933	-0.00735209	-0.00735209	-0.0045235	-0.0045235	0.000767741
	2.91	-0.142258	0.857461	-108.775	-108.224	-108.22	-108.22	-108.217	-108.217	-108.21	-108.775	-108.268	-108.262	-108.262	-108.259	-108.259	-108.253	-108.775	-108.36	-108.353	-108.353	-108.35	-108.35	-108.345		2.92	-0.559869	-0.00950747	-0.00517449	-0.00517449	-0.00233882	-0.00233882	0.00467299	-0.520785	-0.0137656	-0.00776385	-0.00776385	-0.00485372	-0.00485372	0.000896961	-0.42918	-0.0137591	-0.00754479	-0.00754479	-0.00465401	-0.00465401	0.000698182
	2.9	-0.141744	0.85806	-108.775	-108.225	-108.22	-108.22	-108.217	-108.217	-108.21	-108.775	-108.268	-108.262	-108.262	-108.259	-108.259	-108.253	-108.775	-108.36	-108.353	-108.353	-108.35	-108.35	-108.345		2.91	-0.55978	-0.00968361	-0.00533422	-0.00533422	-0.00243394	-0.00243394	0.0047025	-0.520697	-0.0140348	-0.00796792	-0.00796792	-0.00499406	-0.00499406	0.000826876	-0.429091	-0.0140294	-0.00774194	-0.00774194	-0.00478763	-0.00478763	0.000625483
	2.89	-0.141222	0.858708	-108.774	-108.225	-108.22	-108.22	-108.217	-108.217	-108.21	-108.774	-108.268	-108.262	-108.262	-108.259	-108.259	-108.253	-108.774	-108.36	-108.354	-108.354	-108.351	-108.351	-108.345		2.9	-0.559688	-0.00986245	-0.00549818	-0.00549818	-0.00253182	-0.00253182	0.00473099	-0.520605	-0.0143085	-0.00817674	-0.00817674	-0.0051378	-0.0051378	0.000753467	-0.428999	-0.0143043	-0.00794362	-0.00794362	-0.00492441	-0.00492441	0.000549565
	2.88	-0.140693	0.859401	-108.774	-108.225	-108.221	-108.221	-108.218	-108.218	-108.21	-108.774	-108.269	-108.263	-108.263	-108.259	-108.259	-108.253	-108.774	-108.36	-108.354	-108.354	-108.351	-108.351	-108.345		2.89	-0.559593	-0.010044	-0.00566646	-0.00566646	-0.00263251	-0.00263251	0.00475839	-0.520509	-0.0145867	-0.0083904	-0.0083904	-0.00528498	-0.00528498	0.000676646	-0.428904	-0.0145837	-0.00814991	-0.00814991	-0.00506441	-0.00506441	0.000470345
	2.87	-0.140155	0.860147	-108.774	-108.225	-108.221	-108.221	-108.218	-108.218	-108.21	-108.774	-108.269	-108.263	-108.263	-108.259	-108.259	-108.253	-108.774	-108.361	-108.354	-108.354	-108.351	-108.351	-108.345		2.88	-0.559494	-0.0102278	-0.00583921	-0.00583921	-0.00273611	-0.00273611	0.00478506	-0.520411	-0.0148697	-0.00860905	-0.00860905	-0.00543574	-0.00543574	0.000596267	-0.428805	-0.0148676	-0.00836086	-0.00836086	-0.00520761	-0.00520761	0.000387829
	2.86	-0.139608	0.860943	-108.774	-108.225	-108.221	-108.221	-108.218	-108.218	-108.21	-108.774	-108.269	-108.263	-108.263	-108.26	-108.26	-108.253	-108.774	-108.361	-108.354	-108.354	-108.351	-108.351	-108.345		2.87	-0.559392	-0.0104149	-0.00601641	-0.00601641	-0.00284258	-0.00284258	0.00481016	-0.520308	-0.0151574	-0.00883267	-0.00883267	-0.00559001	-0.00559001	0.000512349	-0.428703	-0.0151563	-0.00857663	-0.00857663	-0.0053542	-0.0053542	0.000301765
	2.85	-0.139053	0.861789	-108.774	-108.226	-108.221	-108.221	-108.218	-108.218	-108.21	-108.774	-108.27	-108.263	-108.263	-108.26	-108.26	-108.254	-108.774	-108.361	-108.355	-108.355	-108.351	-108.351	-108.345		2.86	-0.559286	-0.0106047	-0.00619823	-0.00619823	-0.00295206	-0.00295206	0.004834	-0.520203	-0.0154498	-0.00906142	-0.00906142	-0.00574792	-0.00574792	0.000424736	-0.428597	-0.0154498	-0.00879729	-0.00879729	-0.00550416	-0.00550416	0.000212148
	2.84	-0.13849	0.862686	-108.774	-108.226	-108.221	-108.221	-108.218	-108.218	-108.21	-108.774	-108.27	-108.263	-108.263	-108.26	-108.26	-108.254	-108.774	-108.362	-108.355	-108.355	-108.351	-108.351	-108.345		2.85	-0.559176	-0.0107975	-0.00638475	-0.00638475	-0.00306457	-0.00306457	0.00485654	-0.520093	-0.015747	-0.00929538	-0.00929538	-0.00590953	-0.00590953	0.000333342	-0.428488	-0.0157481	-0.00902292	-0.00902292	-0.00565755	-0.00565755	0.000118898
	2.83	-0.137918	0.863635	-108.774	-108.226	-108.222	-108.222	-108.218	-108.218	-108.21	-108.774	-108.27	-108.264	-108.264	-108.26	-108.26	-108.254	-108.774	-108.362	-108.355	-108.355	-108.351	-108.351	-108.346		2.84	-0.559062	-0.010993	-0.00657605	-0.00657605	-0.00318017	-0.00318017	0.00487772	-0.519979	-0.0160492	-0.00953464	-0.00953464	-0.00607489	-0.00607489	0.000238072	-0.428374	-0.0160512	-0.00925359	-0.00925359	-0.00581443	-0.00581443	2.19321e-05
	2.82	-0.137337	0.864637	-108.774	-108.226	-108.222	-108.222	-108.218	-108.218	-108.21	-108.774	-108.271	-108.264	-108.264	-108.26	-108.26	-108.254	-108.774	-108.362	-108.355	-108.355	-108.352	-108.352	-108.346		2.83	-0.558945	-0.0111915	-0.00677224	-0.00677224	-0.0032989	-0.0032989	0.00489749	-0.519862	-0.0163563	-0.00977931	-0.00977931	-0.00624407	-0.00624407	0.000138836	-0.428256	-0.0163593	-0.00948941	-0.00948941	-0.00597485	-0.00597485	-7.88329e-05
	2.81	-0.136747	0.865691	-108.774	-108.226	-108.222	-108.222	-108.218	-108.218	-108.21	-108.774	-108.271	-108.264	-108.264	-108.26	-108.26	-108.254	-108.774	-108.362	-108.355	-108.355	-108.352	-108.352	-108.346		2.82	-0.558823	-0.0113928	-0.00697341	-0.00697341	-0.00342082	-0.00342082	0.0049158	-0.51974	-0.0166684	-0.0100295	-0.0100295	-0.00641711	-0.00641711	3.5537e-05	-0.428134	-0.0166723	-0.00973046	-0.00973046	-0.00613885	-0.00613885	-0.00018348
	2.8	-0.136148	0.866798	-108.773	-108.227	-108.222	-108.222	-108.218	-108.218	-108.21	-108.773	-108.271	-108.264	-108.264	-108.261	-108.261	-108.254	-108.773	-108.363	-108.356	-108.356	-108.352	-108.352	-108.346		2.81	-0.558697	-0.0115972	-0.00717965	-0.00717965	-0.00354599	-0.00354599	0.00493259	-0.519613	-0.0169856	-0.0102852	-0.0102852	-0.00659408	-0.00659408	-7.19171e-05	-0.428008	-0.0169903	-0.00997683	-0.00997683	-0.0063065	-0.0063065	-0.000292092
	2.79	-0.13554	0.867959	-108.773	-108.227	-108.222	-108.222	-108.219	-108.219	-108.21	-108.773	-108.272	-108.265	-108.265	-108.261	-108.261	-108.254	-108.773	-108.363	-108.356	-108.356	-108.352	-108.352	-108.346		2.8	-0.558566	-0.0118044	-0.00739106	-0.00739106	-0.00367444	-0.00367444	0.00494779	-0.519483	-0.0173079	-0.0105467	-0.0105467	-0.00677504	-0.00677504	-0.000183621	-0.427877	-0.0173134	-0.0102286	-0.0102286	-0.00647784	-0.00647784	-0.000404753
	2.78	-0.134922	0.869174	-108.773	-108.227	-108.223	-108.223	-108.219	-108.219	-108.21	-108.773	-108.272	-108.265	-108.265	-108.261	-108.261	-108.254	-108.773	-108.363	-108.356	-108.356	-108.352	-108.352	-108.346		2.79	-0.558431	-0.0120147	-0.00760775	-0.00760775	-0.00380624	-0.00380624	0.00496137	-0.519347	-0.0176354	-0.0108139	-0.0108139	-0.00696005	-0.00696005	-0.000299669	-0.427742	-0.0176416	-0.0104859	-0.0104859	-0.00665292	-0.00665292	-0.000521544
	2.77	-0.134295	0.870444	-108.773	-108.227	-108.223	-108.223	-108.219	-108.219	-108.21	-108.773	-108.272	-108.265	-108.265	-108.261	-108.261	-108.254	-108.773	-108.364	-108.357	-108.357	-108.353	-108.353	-108.346		2.78	-0.55829	-0.012228	-0.00782979	-0.00782979	-0.00394143	-0.00394143	0.00497326	-0.519207	-0.0179681	-0.011087	-0.011087	-0.00714915	-0.00714915	-0.000420154	-0.427602	-0.017975	-0.0107488	-0.0107488	-0.0068318	-0.0068318	-0.000642548
	2.76	-0.133658	0.871769	-108.773	-108.227	-108.223	-108.223	-108.219	-108.219	-108.21	-108.773	-108.273	-108.266	-108.266	-108.261	-108.261	-108.255	-108.773	-108.364	-108.357	-108.357	-108.353	-108.353	-108.346		2.77	-0.558145	-0.0124443	-0.00805731	-0.00805731	-0.00408006	-0.00408006	0.0049834	-0.519062	-0.0183062	-0.0113661	-0.0113661	-0.00734241	-0.00734241	-0.000545172	-0.427457	-0.0183136	-0.0110174	-0.0110174	-0.00701452	-0.00701452	-0.000767847
	2.75	-0.133012	0.87315	-108.773	-108.228	-108.223	-108.223	-108.219	-108.219	-108.21	-108.773	-108.273	-108.266	-108.266	-108.262	-108.262	-108.255	-108.773	-108.365	-108.357	-108.357	-108.353	-108.353	-108.347		2.76	-0.557995	-0.0126637	-0.0082904	-0.0082904	-0.00422218	-0.00422218	0.00499174	-0.518912	-0.0186497	-0.0116513	-0.0116513	-0.00753988	-0.00753988	-0.000674815	-0.427307	-0.0186576	-0.0112918	-0.0112918	-0.00720114	-0.00720114	-0.000897526
	2.74	-0.132355	0.874587	-108.772	-108.228	-108.224	-108.224	-108.219	-108.219	-108.21	-108.772	-108.273	-108.266	-108.266	-108.262	-108.262	-108.255	-108.772	-108.365	-108.357	-108.357	-108.353	-108.353	-108.347		2.75	-0.55784	-0.0128863	-0.00852915	-0.00852915	-0.00436784	-0.00436784	0.00499823	-0.518756	-0.0189986	-0.0119426	-0.0119426	-0.00774162	-0.00774162	-0.000809178	-0.427151	-0.0190068	-0.011572	-0.011572	-0.0073917	-0.0073917	-0.00103166
	2.73	-0.131688	0.87608	-108.772	-108.228	-108.224	-108.224	-108.219	-108.219	-108.21	-108.772	-108.274	-108.266	-108.266	-108.262	-108.262	-108.255	-108.772	-108.365	-108.358	-108.358	-108.353	-108.353	-108.347		2.74	-0.557679	-0.0131119	-0.00877367	-0.00877367	-0.00451708	-0.00451708	0.00500281	-0.518595	-0.019353	-0.0122403	-0.0122403	-0.00794767	-0.00794767	-0.000948354	-0.42699	-0.0193615	-0.0118582	-0.0118582	-0.00758624	-0.00758624	-0.00117033
	2.72	-0.131011	0.87763	-108.772	-108.228	-108.224	-108.224	-108.22	-108.22	-108.21	-108.772	-108.274	-108.267	-108.267	-108.262	-108.262	-108.255	-108.772	-108.366	-108.358	-108.358	-108.353	-108.353	-108.347		2.73	-0.557512	-0.0133407	-0.00902407	-0.00902407	-0.00466996	-0.00466996	0.00500542	-0.518429	-0.0197129	-0.0125443	-0.0125443	-0.0081581	-0.0081581	-0.00109244	-0.426823	-0.0197216	-0.0121505	-0.0121505	-0.00778483	-0.00778483	-0.00131361
	2.71	-0.130323	0.879237	-108.772	-108.229	-108.224	-108.224	-108.22	-108.22	-108.21	-108.772	-108.274	-108.267	-108.267	-108.262	-108.262	-108.255	-108.772	-108.366	-108.358	-108.358	-108.354	-108.354	-108.347		2.72	-0.557339	-0.0135727	-0.00928044	-0.00928044	-0.00482651	-0.00482651	0.00500601	-0.518256	-0.0200785	-0.0128548	-0.0128548	-0.00837294	-0.00837294	-0.00124151	-0.426651	-0.0200873	-0.012449	-0.012449	-0.00798749	-0.00798749	-0.00146159
	2.7	-0.129624	0.880901	-108.772	-108.229	-108.225	-108.225	-108.22	-108.22	-108.21	-108.772	-108.275	-108.267	-108.267	-108.263	-108.263	-108.255	-108.772	-108.366	-108.359	-108.359	-108.354	-108.354	-108.347		2.71	-0.557161	-0.013808	-0.00954289	-0.00954289	-0.00498678	-0.00498678	0.00500454	-0.518077	-0.0204498	-0.0131718	-0.0131718	-0.00859226	-0.00859226	-0.00139568	-0.426472	-0.0204585	-0.0127537	-0.0127537	-0.00819428	-0.00819428	-0.00161434
	2.69	-0.128915	0.882623	-108.772	-108.229	-108.225	-108.225	-108.22	-108.22	-108.21	-108.772	-108.275	-108.268	-108.268	-108.263	-108.263	-108.256	-108.772	-108.367	-108.359	-108.359	-108.354	-108.354	-108.347		2.7	-0.556976	-0.0140464	-0.00981154	-0.00981154	-0.00515082	-0.00515082	0.00500094	-0.517892	-0.0208269	-0.0134956	-0.0134956	-0.0088161	-0.0088161	-0.00155503	-0.426287	-0.0208353	-0.0130648	-0.0130648	-0.00840524	-0.00840524	-0.00177194
	2.68	-0.128194	0.884404	-108.771	-108.229	-108.225	-108.225	-108.22	-108.22	-108.21	-108.771	-108.275	-108.268	-108.268	-108.263	-108.263	-108.256	-108.771	-108.367	-108.359	-108.359	-108.354	-108.354	-108.348		2.69	-0.556784	-0.0142882	-0.0100865	-0.0100865	-0.00531866	-0.00531866	0.00499516	-0.517701	-0.0212098	-0.0138261	-0.0138261	-0.00904451	-0.00904451	-0.00171965	-0.426096	-0.0212178	-0.0133823	-0.0133823	-0.00862042	-0.00862042	-0.00193446
	2.67	-0.127462	0.886242	-108.771	-108.23	-108.225	-108.225	-108.22	-108.22	-108.21	-108.771	-108.276	-108.268	-108.268	-108.263	-108.263	-108.256	-108.771	-108.368	-108.36	-108.36	-108.355	-108.355	-108.348		2.68	-0.556586	-0.0145332	-0.0103678	-0.0103678	-0.00549035	-0.00549035	0.00498716	-0.517503	-0.0215986	-0.0141635	-0.0141635	-0.00927753	-0.00927753	-0.00188964	-0.425898	-0.0216061	-0.0137064	-0.0137064	-0.00883985	-0.00883985	-0.00210198
	2.66	-0.126719	0.888139	-108.771	-108.23	-108.226	-108.226	-108.221	-108.221	-108.21	-108.771	-108.276	-108.269	-108.269	-108.264	-108.264	-108.256	-108.771	-108.368	-108.36	-108.36	-108.355	-108.355	-108.348		2.67	-0.556381	-0.0147816	-0.0106557	-0.0106557	-0.00566593	-0.00566593	0.00497689	-0.517298	-0.0219933	-0.0145079	-0.0145079	-0.00951521	-0.00951521	-0.00206507	-0.425692	-0.0220002	-0.0140372	-0.0140372	-0.00906357	-0.00906357	-0.00227457
	2.65	-0.125964	0.890095	-108.771	-108.23	-108.226	-108.226	-108.221	-108.221	-108.21	-108.771	-108.277	-108.269	-108.269	-108.264	-108.264	-108.256	-108.771	-108.368	-108.36	-108.36	-108.355	-108.355	-108.348		2.66	-0.556169	-0.0150333	-0.0109501	-0.0109501	-0.00584543	-0.00584543	0.00496429	-0.517085	-0.0223941	-0.0148594	-0.0148594	-0.0097576	-0.0097576	-0.00224604	-0.42548	-0.0224001	-0.0143747	-0.0143747	-0.00929163	-0.00929163	-0.0024523
	2.64	-0.125197	0.892109	-108.771	-108.23	-108.226	-108.226	-108.221	-108.221	-108.21	-108.771	-108.277	-108.269	-108.269	-108.264	-108.264	-108.257	-108.771	-108.369	-108.361	-108.361	-108.355	-108.355	-108.348		2.65	-0.555949	-0.0152884	-0.0112513	-0.0112513	-0.0060289	-0.0060289	0.00494932	-0.516866	-0.022801	-0.0152181	-0.0152181	-0.0100047	-0.0100047	-0.00243264	-0.42526	-0.022806	-0.0147191	-0.0147191	-0.00952407	-0.00952407	-0.00263525
	2.63	-0.124418	0.894182	-108.77	-108.231	-108.227	-108.227	-108.221	-108.221	-108.21	-108.77	-108.278	-108.27	-108.27	-108.264	-108.264	-108.257	-108.77	-108.369	-108.361	-108.361	-108.356	-108.356	-108.349		2.64	-0.555722	-0.015547	-0.0115594	-0.0115594	-0.00621637	-0.00621637	0.00493194	-0.516638	-0.0232141	-0.0155841	-0.0155841	-0.0102567	-0.0102567	-0.00262495	-0.425033	-0.0232178	-0.0150705	-0.0150705	-0.00976091	-0.00976091	-0.00282349
	2.62	-0.123626	0.896315	-108.77	-108.231	-108.227	-108.227	-108.221	-108.221	-108.21	-108.77	-108.278	-108.27	-108.27	-108.265	-108.265	-108.257	-108.77	-108.37	-108.361	-108.361	-108.356	-108.356	-108.349		2.63	-0.555486	-0.015809	-0.0118744	-0.0118744	-0.00640787	-0.00640787	0.00491209	-0.516403	-0.0236334	-0.0159576	-0.0159576	-0.0105134	-0.0105134	-0.00282306	-0.424798	-0.0236357	-0.0154289	-0.0154289	-0.0100022	-0.0100022	-0.00301707
	2.61	-0.122822	0.898506	-108.77	-108.231	-108.227	-108.227	-108.222	-108.222	-108.21	-108.77	-108.278	-108.271	-108.271	-108.265	-108.265	-108.257	-108.77	-108.37	-108.362	-108.362	-108.356	-108.356	-108.349		2.62	-0.555243	-0.0160745	-0.0121965	-0.0121965	-0.00660345	-0.00660345	0.00488974	-0.516159	-0.0240591	-0.0163385	-0.0163385	-0.010775	-0.010775	-0.00302705	-0.424554	-0.0240596	-0.0157945	-0.0157945	-0.010248	-0.010248	-0.00321608
	2.6	-0.122005	0.900756	-108.77	-108.231	-108.228	-108.228	-108.222	-108.222	-108.21	-108.77	-108.279	-108.271	-108.271	-108.265	-108.265	-108.257	-108.77	-108.37	-108.362	-108.362	-108.356	-108.356	-108.349		2.61	-0.55499	-0.0163436	-0.0125257	-0.0125257	-0.00680312	-0.00680312	0.00486484	-0.515907	-0.0244911	-0.0167271	-0.0167271	-0.0110416	-0.0110416	-0.00323701	-0.424302	-0.0244898	-0.0161674	-0.0161674	-0.0104983	-0.0104983	-0.00342057
	2.59	-0.121174	0.903066	-108.769	-108.232	-108.228	-108.228	-108.222	-108.222	-108.21	-108.769	-108.279	-108.271	-108.271	-108.265	-108.265	-108.258	-108.769	-108.371	-108.362	-108.362	-108.357	-108.357	-108.349		2.6	-0.554729	-0.0166161	-0.0128623	-0.0128623	-0.00700693	-0.00700693	0.00483735	-0.515646	-0.0249296	-0.0171234	-0.0171234	-0.011313	-0.011313	-0.00345302	-0.424041	-0.0249262	-0.0165477	-0.0165477	-0.0107531	-0.0107531	-0.00363061
	2.58	-0.120331	0.905434	-108.769	-108.232	-108.228	-108.228	-108.222	-108.222	-108.21	-108.769	-108.28	-108.272	-108.272	-108.266	-108.266	-108.258	-108.769	-108.371	-108.363	-108.363	-108.357	-108.357	-108.35		2.59	-0.554459	-0.0168923	-0.0132063	-0.0132063	-0.0072149	-0.0072149	0.00480724	-0.515376	-0.0253747	-0.0175276	-0.0175276	-0.0115895	-0.0115895	-0.00367515	-0.423771	-0.0253688	-0.0169355	-0.0169355	-0.0110125	-0.0110125	-0.00384626
	2.57	-0.119474	0.90786	-108.769	-108.232	-108.229	-108.229	-108.222	-108.222	-108.21	-108.769	-108.28	-108.272	-108.272	-108.266	-108.266	-108.258	-108.769	-108.372	-108.363	-108.363	-108.357	-108.357	-108.35		2.58	-0.55418	-0.0171721	-0.0135579	-0.0135579	-0.00742706	-0.00742706	0.00477447	-0.515097	-0.0258264	-0.0179397	-0.0179397	-0.0118709	-0.0118709	-0.0039035	-0.423491	-0.0258179	-0.0173309	-0.0173309	-0.0112765	-0.0112765	-0.00406758
	2.56	-0.118602	0.910346	-108.768	-108.233	-108.229	-108.229	-108.223	-108.223	-108.21	-108.768	-108.281	-108.273	-108.273	-108.266	-108.266	-108.258	-108.768	-108.372	-108.364	-108.364	-108.357	-108.357	-108.35		2.57	-0.553891	-0.0174556	-0.0139171	-0.0139171	-0.00764344	-0.00764344	0.004739	-0.514807	-0.0262848	-0.0183599	-0.0183599	-0.0121574	-0.0121574	-0.00413814	-0.423202	-0.0262734	-0.017734	-0.017734	-0.0115451	-0.0115451	-0.00429464
	2.55	-0.117717	0.912889	-108.768	-108.233	-108.229	-108.229	-108.223	-108.223	-108.21	-108.768	-108.281	-108.273	-108.273	-108.267	-108.267	-108.259	-108.768	-108.373	-108.364	-108.364	-108.358	-108.358	-108.35		2.56	-0.553591	-0.0177428	-0.0142841	-0.0142841	-0.00786406	-0.00786406	0.0047008	-0.514508	-0.02675	-0.0187884	-0.0187884	-0.0124489	-0.0124489	-0.00437914	-0.422903	-0.0267353	-0.018145	-0.018145	-0.0118184	-0.0118184	-0.00452748
	2.54	-0.116818	0.91549	-108.768	-108.233	-108.23	-108.23	-108.223	-108.223	-108.21	-108.768	-108.282	-108.274	-108.274	-108.267	-108.267	-108.259	-108.768	-108.373	-108.364	-108.364	-108.358	-108.358	-108.351		2.55	-0.553282	-0.0180338	-0.0146591	-0.0146591	-0.00808895	-0.00808895	0.00465984	-0.514198	-0.0272221	-0.0192251	-0.0192251	-0.0127456	-0.0127456	-0.00462659	-0.422593	-0.0272039	-0.0185639	-0.0185639	-0.0120964	-0.0120964	-0.00476617
	2.53	-0.115903	0.91656	-108.767	-108.233	-108.23	-108.23	-108.223	-108.223	-108.21	-108.767	-108.282	-108.274	-108.274	-108.267	-108.267	-108.259	-108.767	-108.374	-108.365	-108.365	-108.358	-108.358	-108.351		2.54	-0.552961	-0.0183285	-0.0150422	-0.0150422	-0.00831812	-0.00831812	0.00461609	-0.513878	-0.0277011	-0.0196703	-0.0196703	-0.0130473	-0.0130473	-0.00488056	-0.422272	-0.0276791	-0.018991	-0.018991	-0.0123791	-0.0123791	-0.00501077
	2.52	-0.114974	0.916333	-108.767	-108.234	-108.231	-108.231	-108.224	-108.224	-108.21	-108.767	-108.283	-108.274	-108.274	-108.268	-108.268	-108.259	-108.767	-108.374	-108.365	-108.365	-108.358	-108.358	-108.351		2.53	-0.552629	-0.0186271	-0.0154334	-0.0154334	-0.00855161	-0.00855161	0.00456951	-0.513546	-0.0281872	-0.020124	-0.020124	-0.0133542	-0.0133542	-0.00514113	-0.421941	-0.028161	-0.0194262	-0.0194262	-0.0126665	-0.0126665	-0.00526132
	2.51	-0.114029	0.916115	-108.767	-108.234	-108.231	-108.231	-108.224	-108.224	-108.21	-108.767	-108.283	-108.275	-108.275	-108.268	-108.268	-108.26	-108.767	-108.375	-108.366	-108.366	-108.359	-108.359	-108.351		2.52	-0.552286	-0.0189295	-0.015833	-0.015833	-0.00878942	-0.00878942	0.0045201	-0.513203	-0.0286804	-0.0205864	-0.0205864	-0.0136663	-0.0136663	-0.00540836	-0.421598	-0.0286496	-0.0198697	-0.0198697	-0.0129587	-0.0129587	-0.00551788
	2.5	-0.113069	0.915907	-108.766	-108.234	-108.231	-108.231	-108.224	-108.224	-108.21	-108.766	-108.284	-108.275	-108.275	-108.268	-108.268	-108.26	-108.766	-108.375	-108.366	-108.366	-108.359	-108.359	-108.352		2.51	-0.551931	-0.0192359	-0.016241	-0.016241	-0.00903157	-0.00903157	0.00446781	-0.512848	-0.0291808	-0.0210577	-0.0210577	-0.0139836	-0.0139836	-0.00568234	-0.421242	-0.0291452	-0.0203217	-0.0203217	-0.0132556	-0.0132556	-0.00578051
	2.49	-0.112092	0.915709	-108.766	-108.235	-108.232	-108.232	-108.224	-108.224	-108.21	-108.766	-108.284	-108.276	-108.276	-108.269	-108.269	-108.26	-108.766	-108.376	-108.367	-108.367	-108.359	-108.359	-108.352		2.5	-0.551564	-0.0195463	-0.0166577	-0.0166577	-0.00927809	-0.00927809	0.00441263	-0.51248	-0.0296886	-0.0215379	-0.0215379	-0.014306	-0.014306	-0.00596314	-0.420875	-0.0296477	-0.0207823	-0.0207823	-0.0135574	-0.0135574	-0.00604924
	2.48	-0.1111	0.915521	-108.766	-108.235	-108.232	-108.232	-108.225	-108.225	-108.211	-108.766	-108.285	-108.276	-108.276	-108.269	-108.269	-108.26	-108.766	-108.376	-108.367	-108.367	-108.36	-108.36	-108.352		2.49	-0.551183	-0.0198607	-0.0170832	-0.0170832	-0.00952898	-0.00952898	0.00435455	-0.5121	-0.0302038	-0.0220271	-0.0220271	-0.0146337	-0.0146337	-0.00625082	-0.420495	-0.0301572	-0.0212516	-0.0212516	-0.0138639	-0.0138639	-0.00632414
	2.47	-0.11009	0.915344	-108.765	-108.235	-108.233	-108.233	-108.225	-108.225	-108.211	-108.765	-108.285	-108.277	-108.277	-108.269	-108.269	-108.261	-108.765	-108.377	-108.368	-108.368	-108.36	-108.36	-108.352		2.48	-0.55079	-0.0201792	-0.0175175	-0.0175175	-0.00978427	-0.00978427	0.00429354	-0.511707	-0.0307265	-0.0225256	-0.0225256	-0.0149666	-0.0149666	-0.00654545	-0.420101	-0.0306739	-0.0217297	-0.0217297	-0.0141752	-0.0141752	-0.00660524
	2.46	-0.109064	0.915177	-108.765	-108.236	-108.233	-108.233	-108.225	-108.225	-108.211	-108.765	-108.286	-108.277	-108.277	-108.27	-108.27	-108.261	-108.765	-108.377	-108.368	-108.368	-108.36	-108.36	-108.353		2.47	-0.550383	-0.0205018	-0.017961	-0.017961	-0.0100439	-0.0100439	0.00422959	-0.5113	-0.0312568	-0.0230334	-0.0230334	-0.0153048	-0.0153048	-0.00684712	-0.419694	-0.0311977	-0.0222169	-0.0222169	-0.0144914	-0.0144914	-0.0068926
	2.45	-0.108021	0.915022	-108.764	-108.236	-108.234	-108.234	-108.225	-108.225	-108.211	-108.764	-108.286	-108.278	-108.278	-108.27	-108.27	-108.261	-108.764	-108.378	-108.369	-108.369	-108.361	-108.361	-108.353		2.46	-0.549962	-0.0208286	-0.0184137	-0.0184137	-0.010308	-0.010308	0.00416268	-0.510878	-0.0317948	-0.0235508	-0.0235508	-0.0156483	-0.0156483	-0.00715587	-0.419273	-0.0317289	-0.0227132	-0.0227132	-0.0148124	-0.0148124	-0.00718625
	2.44	-0.106959	0.914878	-108.764	-108.236	-108.234	-108.234	-108.226	-108.226	-108.211	-108.764	-108.287	-108.279	-108.279	-108.27	-108.27	-108.262	-108.764	-108.378	-108.369	-108.369	-108.361	-108.361	-108.353		2.45	-0.549526	-0.0211597	-0.0188757	-0.0188757	-0.0105765	-0.0105765	0.00409282	-0.510443	-0.0323407	-0.0240778	-0.0240778	-0.015997	-0.015997	-0.00747179	-0.418837	-0.0322674	-0.0232187	-0.0232187	-0.0151383	-0.0151383	-0.00748625
	2.43	-0.10588	0.914745	-108.763	-108.237	-108.235	-108.235	-108.226	-108.226	-108.211	-108.763	-108.287	-108.279	-108.279	-108.271	-108.271	-108.262	-108.763	-108.379	-108.37	-108.37	-108.361	-108.361	-108.354		2.44	-0.549075	-0.0214952	-0.0193474	-0.0193474	-0.0108495	-0.0108495	0.00401998	-0.509992	-0.0328945	-0.0246146	-0.0246146	-0.016351	-0.016351	-0.00779494	-0.418387	-0.0328134	-0.0237338	-0.0237338	-0.015469	-0.015469	-0.00779264
	2.42	-0.104782	0.914625	-108.763	-108.237	-108.235	-108.235	-108.226	-108.226	-108.211	-108.763	-108.288	-108.28	-108.28	-108.271	-108.271	-108.262	-108.763	-108.379	-108.37	-108.37	-108.362	-108.362	-108.354		2.43	-0.548609	-0.021835	-0.0198288	-0.0198288	-0.0111268	-0.0111268	0.00394416	-0.509526	-0.0334564	-0.0251614	-0.0251614	-0.0167103	-0.0167103	-0.00812538	-0.41792	-0.033367	-0.0242584	-0.0242584	-0.0158046	-0.0158046	-0.00810546
	2.41	-0.103666	0.914516	-108.762	-108.237	-108.236	-108.236	-108.227	-108.227	-108.211	-108.762	-108.289	-108.28	-108.28	-108.271	-108.271	-108.263	-108.762	-108.38	-108.371	-108.371	-108.362	-108.362	-108.354		2.42	-0.548126	-0.0221793	-0.0203202	-0.0203202	-0.0114086	-0.0114086	0.00386536	-0.509043	-0.0340265	-0.0257183	-0.0257183	-0.017075	-0.017075	-0.00846318	-0.417438	-0.0339282	-0.0247928	-0.0247928	-0.016145	-0.016145	-0.00842475
	2.4	-0.10253	0.914421	-108.762	-108.238	-108.236	-108.236	-108.227	-108.227	-108.211	-108.762	-108.289	-108.281	-108.281	-108.272	-108.272	-108.263	-108.762	-108.381	-108.371	-108.371	-108.362	-108.362	-108.355		2.41	-0.547627	-0.0225282	-0.0208216	-0.0208216	-0.0116948	-0.0116948	0.00378357	-0.508544	-0.0346048	-0.0262856	-0.0262856	-0.0174449	-0.0174449	-0.00880841	-0.416939	-0.0344973	-0.0253372	-0.0253372	-0.0164904	-0.0164904	-0.00875055
	2.39	-0.101374	0.914338	-108.761	-108.238	-108.237	-108.237	-108.227	-108.227	-108.211	-108.761	-108.29	-108.281	-108.281	-108.272	-108.272	-108.263	-108.761	-108.381	-108.372	-108.372	-108.363	-108.363	-108.355		2.4	-0.547111	-0.0228816	-0.0213334	-0.0213334	-0.0119854	-0.0119854	0.0036988	-0.508028	-0.0351916	-0.0268633	-0.0268633	-0.0178202	-0.0178202	-0.00916113	-0.416422	-0.0350742	-0.0258917	-0.0258917	-0.0168406	-0.0168406	-0.0090829
	2.38	-0.100198	0.914268	-108.761	-108.238	-108.237	-108.237	-108.227	-108.227	-108.211	-108.761	-108.29	-108.282	-108.282	-108.272	-108.272	-108.264	-108.761	-108.382	-108.373	-108.373	-108.363	-108.363	-108.355		2.39	-0.546577	-0.0232398	-0.0218557	-0.0218557	-0.0122805	-0.0122805	0.00361105	-0.507494	-0.0357869	-0.0274517	-0.0274517	-0.0182008	-0.0182008	-0.00952141	-0.415888	-0.0356592	-0.0264565	-0.0264565	-0.0171957	-0.0171957	-0.00942185
	2.37	-0.099002	0.914211	-108.76	-108.239	-108.238	-108.238	-108.228	-108.228	-108.211	-108.76	-108.291	-108.283	-108.283	-108.273	-108.273	-108.264	-108.76	-108.382	-108.373	-108.373	-108.363	-108.363	-108.356		2.38	-0.546024	-0.0236029	-0.0223886	-0.0223886	-0.0125799	-0.0125799	0.00352033	-0.506941	-0.0363909	-0.0280509	-0.0280509	-0.0185867	-0.0185867	-0.00988931	-0.415336	-0.0362523	-0.0270318	-0.0270318	-0.0175557	-0.0175557	-0.00976744
	2.36	-0.0977842	0.914169	-108.76	-108.239	-108.238	-108.238	-108.228	-108.228	-108.211	-108.76	-108.292	-108.283	-108.283	-108.273	-108.273	-108.265	-108.76	-108.383	-108.374	-108.374	-108.364	-108.364	-108.356		2.37	-0.545453	-0.0239708	-0.0229326	-0.0229326	-0.0128838	-0.0128838	0.00342663	-0.50637	-0.0370037	-0.0286612	-0.0286612	-0.0189779	-0.0189779	-0.0102649	-0.414764	-0.0368536	-0.0276178	-0.0276178	-0.0179206	-0.0179206	-0.0101197
	2.35	-0.0965454	0.91414	-108.759	-108.24	-108.239	-108.239	-108.228	-108.228	-108.212	-108.759	-108.292	-108.284	-108.284	-108.274	-108.274	-108.265	-108.759	-108.384	-108.374	-108.374	-108.364	-108.364	-108.356		2.36	-0.544862	-0.0243427	-0.0234874	-0.0234874	-0.0131918	-0.0131918	0.00333077	-0.505779	-0.0376254	-0.0292827	-0.0292827	-0.0193744	-0.0193744	-0.0106482	-0.414173	-0.0374631	-0.0282146	-0.0282146	-0.0182903	-0.0182903	-0.0104785
	2.34	-0.0952847	0.914125	-108.758	-108.24	-108.239	-108.239	-108.229	-108.229	-108.212	-108.758	-108.293	-108.284	-108.284	-108.274	-108.274	-108.265	-108.758	-108.384	-108.375	-108.375	-108.365	-108.365	-108.357		2.35	-0.544251	-0.0247207	-0.0240538	-0.0240538	-0.0135045	-0.0135045	0.0032312	-0.505167	-0.0382563	-0.0299157	-0.0299157	-0.0197763	-0.0197763	-0.0110393	-0.413562	-0.0380813	-0.0288226	-0.0288226	-0.018665	-0.018665	-0.0108442
	2.33	-0.0940015	0.914125	-108.758	-108.24	-108.24	-108.24	-108.229	-108.229	-108.212	-108.758	-108.293	-108.285	-108.285	-108.274	-108.274	-108.266	-108.758	-108.385	-108.376	-108.376	-108.365	-108.365	-108.357		2.34	-0.543618	-0.0251039	-0.0246318	-0.0246318	-0.0138215	-0.0138215	0.00312868	-0.504535	-0.0388965	-0.0305605	-0.0305605	-0.0201835	-0.0201835	-0.0114383	-0.41293	-0.0387082	-0.029442	-0.029442	-0.0190445	-0.0190445	-0.0112167
	2.32	-0.0926953	0.914139	-108.757	-108.241	-108.241	-108.241	-108.229	-108.229	-108.212	-108.757	-108.294	-108.286	-108.286	-108.275	-108.275	-108.266	-108.757	-108.385	-108.376	-108.376	-108.365	-108.365	-108.357		2.33	-0.542965	-0.0254925	-0.0252218	-0.0252218	-0.0141429	-0.0141429	0.00302324	-0.503881	-0.0395461	-0.0312171	-0.0312171	-0.020596	-0.020596	-0.0118453	-0.412276	-0.0393438	-0.0300729	-0.0300729	-0.019429	-0.019429	-0.011596
	2.31	-0.0913657	0.914169	-108.756	-108.241	-108.241	-108.241	-108.23	-108.23	-108.212	-108.756	-108.295	-108.286	-108.286	-108.275	-108.275	-108.267	-108.756	-108.386	-108.377	-108.377	-108.366	-108.366	-108.358		2.32	-0.542288	-0.0258865	-0.0258238	-0.0258238	-0.0144687	-0.0144687	0.0029149	-0.503205	-0.0402053	-0.031886	-0.031886	-0.0210139	-0.0210139	-0.0122602	-0.4116	-0.0399884	-0.0307157	-0.0307157	-0.0198183	-0.0198183	-0.0119822
	2.3	-0.0900121	0.914213	-108.756	-108.242	-108.242	-108.242	-108.23	-108.23	-108.212	-108.756	-108.295	-108.287	-108.287	-108.276	-108.276	-108.267	-108.756	-108.387	-108.378	-108.378	-108.366	-108.366	-108.358		2.31	-0.541589	-0.0264382	-0.0264382	-0.0262861	-0.0147987	-0.0147987	0.00280367	-0.502506	-0.0408742	-0.0325673	-0.0325673	-0.021437	-0.021437	-0.0126833	-0.410901	-0.0406421	-0.0313705	-0.0313705	-0.0202125	-0.0202125	-0.0123753
	2.29	-0.088634	0.914273	-108.755	-108.243	-108.243	-108.242	-108.23	-108.23	-108.212	-108.755	-108.296	-108.288	-108.288	-108.276	-108.276	-108.267	-108.755	-108.387	-108.378	-108.378	-108.367	-108.367	-108.359		2.3	-0.540866	-0.0270653	-0.0270653	-0.0266915	-0.0151331	-0.0151331	0.00268957	-0.501783	-0.0415532	-0.0332612	-0.0332612	-0.0218655	-0.0218655	-0.0131144	-0.410178	-0.0413051	-0.0320377	-0.0320377	-0.0206116	-0.0206116	-0.0127754
	2.28	-0.0872308	0.914349	-108.754	-108.243	-108.243	-108.242	-108.231	-108.231	-108.212	-108.754	-108.297	-108.289	-108.289	-108.277	-108.277	-108.268	-108.754	-108.388	-108.379	-108.379	-108.367	-108.367	-108.359		2.29	-0.540119	-0.0277053	-0.0277053	-0.0271028	-0.0154717	-0.0154717	0.00257264	-0.501035	-0.0422422	-0.0339682	-0.0339682	-0.0222992	-0.0222992	-0.0135538	-0.40943	-0.0419775	-0.0327174	-0.0327174	-0.0210155	-0.0210155	-0.0131825
	2.27	-0.0858019	0.914441	-108.753	-108.244	-108.244	-108.243	-108.231	-108.231	-108.212	-108.753	-108.298	-108.289	-108.289	-108.277	-108.277	-108.268	-108.753	-108.389	-108.38	-108.38	-108.367	-108.367	-108.36		2.28	-0.539346	-0.0283585	-0.0283585	-0.0275201	-0.0158146	-0.0158146	0.00245288	-0.500262	-0.0429416	-0.0346884	-0.0346884	-0.0227383	-0.0227383	-0.0140014	-0.408657	-0.0426596	-0.0334101	-0.0334101	-0.0214243	-0.0214243	-0.0135965
	2.26	-0.0843468	0.914549	-108.753	-108.245	-108.245	-108.243	-108.231	-108.231	-108.213	-108.753	-108.298	-108.29	-108.29	-108.278	-108.278	-108.269	-108.753	-108.39	-108.38	-108.38	-108.368	-108.368	-108.36		2.27	-0.538546	-0.0290252	-0.0290252	-0.0279437	-0.0161617	-0.0161617	0.00233033	-0.499463	-0.0436515	-0.0354221	-0.0354221	-0.0231826	-0.0231826	-0.0144574	-0.407858	-0.0433514	-0.034116	-0.034116	-0.0218379	-0.0218379	-0.0140177
	2.25	-0.0828649	0.914673	-108.752	-108.245	-108.245	-108.244	-108.232	-108.232	-108.213	-108.752	-108.299	-108.291	-108.291	-108.278	-108.278	-108.269	-108.752	-108.39	-108.381	-108.381	-108.368	-108.368	-108.36		2.26	-0.53772	-0.0297058	-0.0297058	-0.0283736	-0.016513	-0.016513	0.00220502	-0.498637	-0.0443722	-0.0361697	-0.0361697	-0.0236322	-0.0236322	-0.0149218	-0.407031	-0.0440533	-0.0348353	-0.0348353	-0.0222563	-0.0222563	-0.014446
	2.24	-0.0813556	0.914814	-108.751	-108.246	-108.246	-108.244	-108.232	-108.232	-108.213	-108.751	-108.3	-108.292	-108.292	-108.278	-108.278	-108.27	-108.751	-108.391	-108.382	-108.382	-108.369	-108.369	-108.361		2.25	-0.536866	-0.0304006	-0.0304006	-0.0288101	-0.0168683	-0.0168683	0.00207698	-0.497783	-0.0451038	-0.0369315	-0.0369315	-0.0240871	-0.0240871	-0.0153946	-0.406177	-0.0447653	-0.0355685	-0.0355685	-0.0226796	-0.0226796	-0.0148814
	2.23	-0.0798181	0.914972	-108.75	-108.247	-108.247	-108.245	-108.232	-108.232	-108.213	-108.75	-108.301	-108.292	-108.292	-108.279	-108.279	-108.27	-108.75	-108.392	-108.383	-108.383	-108.369	-108.369	-108.361		2.24	-0.535983	-0.0311099	-0.0311099	-0.0292534	-0.0172278	-0.0172278	0.00194622	-0.4969	-0.0458466	-0.0377079	-0.0377079	-0.0245472	-0.0245472	-0.015876	-0.405294	-0.0454878	-0.0363158	-0.0363158	-0.0231076	-0.0231076	-0.015324
	2.22	-0.078252	0.915147	-108.749	-108.247	-108.247	-108.245	-108.233	-108.233	-108.213	-108.749	-108.301	-108.293	-108.293	-108.279	-108.279	-108.271	-108.749	-108.392	-108.383	-108.383	-108.369	-108.369	-108.362		2.23	-0.53507	-0.031834	-0.031834	-0.0297037	-0.0175914	-0.0175914	0.0018128	-0.495987	-0.0466009	-0.0384991	-0.0384991	-0.0250126	-0.0250126	-0.016366	-0.404381	-0.0462209	-0.0370777	-0.0370777	-0.0235405	-0.0235405	-0.0157739
	2.21	-0.0766565	0.915339	-108.748	-108.248	-108.248	-108.245	-108.233	-108.233	-108.213	-108.748	-108.302	-108.294	-108.294	-108.28	-108.28	-108.271	-108.748	-108.393	-108.384	-108.384	-108.37	-108.37	-108.362		2.22	-0.534126	-0.0325733	-0.0325733	-0.0301612	-0.0179589	-0.0179589	0.00167674	-0.495043	-0.0473668	-0.0393056	-0.0393056	-0.0254832	-0.0254832	-0.0168646	-0.403438	-0.0469649	-0.0378544	-0.0378544	-0.0239781	-0.0239781	-0.0162311
	2.2	-0.075031	0.915549	-108.747	-108.249	-108.249	-108.246	-108.234	-108.234	-108.213	-108.747	-108.303	-108.295	-108.295	-108.28	-108.28	-108.272	-108.747	-108.394	-108.385	-108.385	-108.37	-108.37	-108.363		2.21	-0.533151	-0.0333282	-0.0333282	-0.0306262	-0.0183303	-0.0183303	0.00153807	-0.494068	-0.0481447	-0.0401277	-0.0401277	-0.0259591	-0.0259591	-0.017372	-0.402463	-0.0477201	-0.0386464	-0.0386464	-0.0244205	-0.0244205	-0.0166956
	2.19	-0.0733747	0.915776	-108.746	-108.25	-108.25	-108.246	-108.234	-108.234	-108.214	-108.746	-108.304	-108.296	-108.296	-108.281	-108.281	-108.272	-108.746	-108.395	-108.386	-108.386	-108.371	-108.371	-108.363		2.2	-0.532143	-0.0340991	-0.0340991	-0.0310988	-0.0187056	-0.0187056	0.00139683	-0.49306	-0.0489348	-0.0409658	-0.0409658	-0.0264401	-0.0264401	-0.0178883	-0.401455	-0.0484866	-0.039454	-0.039454	-0.0248675	-0.0248675	-0.0171676
	2.18	-0.071687	0.916021	-108.745	-108.251	-108.251	-108.247	-108.234	-108.234	-108.214	-108.745	-108.304	-108.297	-108.297	-108.281	-108.281	-108.273	-108.745	-108.396	-108.387	-108.387	-108.371	-108.371	-108.364		2.19	-0.531102	-0.0348863	-0.0348863	-0.0315795	-0.0190847	-0.0190847	0.00125306	-0.492018	-0.0497373	-0.0418205	-0.0418205	-0.0269263	-0.0269263	-0.0184134	-0.400413	-0.0492648	-0.0402776	-0.0402776	-0.0253193	-0.0253193	-0.0176469
	2.17	-0.0699671	0.916284	-108.744	-108.251	-108.251	-108.247	-108.235	-108.235	-108.214	-108.744	-108.305	-108.297	-108.297	-108.282	-108.282	-108.273	-108.744	-108.396	-108.387	-108.387	-108.372	-108.372	-108.364		2.18	-0.530025	-0.0356903	-0.0356903	-0.0320683	-0.0194676	-0.0194676	0.00110679	-0.490942	-0.0505527	-0.042692	-0.042692	-0.0274177	-0.0274177	-0.0189475	-0.399337	-0.0500549	-0.0411178	-0.0411178	-0.0257758	-0.0257758	-0.0181338
	2.16	-0.0682143	0.916565	-108.743	-108.252	-108.252	-108.248	-108.235	-108.235	-108.214	-108.743	-108.306	-108.298	-108.298	-108.282	-108.282	-108.274	-108.743	-108.397	-108.388	-108.388	-108.372	-108.372	-108.365		2.17	-0.528913	-0.0365114	-0.0365114	-0.0325657	-0.0198541	-0.0198541	0.000958075	-0.489829	-0.0513812	-0.0435808	-0.0435808	-0.0279142	-0.0279142	-0.0194906	-0.398224	-0.0508572	-0.0419748	-0.0419748	-0.026237	-0.026237	-0.0186282
	2.15	-0.0664278	0.916864	-108.741	-108.253	-108.253	-108.248	-108.235	-108.235	-108.214	-108.741	-108.307	-108.299	-108.299	-108.283	-108.283	-108.275	-108.741	-108.398	-108.389	-108.389	-108.373	-108.373	-108.365		2.16	-0.527763	-0.0373502	-0.0373502	-0.033072	-0.0202441	-0.0202441	0.000806946	-0.48868	-0.052223	-0.0444875	-0.0444875	-0.0284159	-0.0284159	-0.0200428	-0.397075	-0.0516721	-0.0428493	-0.0428493	-0.0267027	-0.0267027	-0.0191302
	2.14	-0.0646069	0.917181	-108.74	-108.254	-108.254	-108.249	-108.236	-108.236	-108.214	-108.74	-108.308	-108.3	-108.3	-108.283	-108.283	-108.275	-108.74	-108.399	-108.39	-108.39	-108.373	-108.373	-108.366		2.15	-0.526575	-0.0382069	-0.0382069	-0.0335874	-0.0206377	-0.0206377	0.000653446	-0.487492	-0.0530787	-0.0454124	-0.0454124	-0.0289227	-0.0289227	-0.0206042	-0.395887	-0.0524998	-0.0437415	-0.0437415	-0.0271731	-0.0271731	-0.0196398
	2.13	-0.0627508	0.917517	-108.739	-108.255	-108.255	-108.249	-108.236	-108.236	-108.214	-108.739	-108.309	-108.301	-108.301	-108.284	-108.284	-108.276	-108.739	-108.4	-108.391	-108.391	-108.374	-108.374	-108.366		2.14	-0.525348	-0.0390822	-0.0390822	-0.0341124	-0.0210346	-0.0210346	0.00049762	-0.486265	-0.0539484	-0.0463562	-0.0463562	-0.0294345	-0.0294345	-0.0211749	-0.394659	-0.0533408	-0.0446521	-0.0446521	-0.027648	-0.027648	-0.0201572
	2.12	-0.0608585	0.917871	-108.738	-108.256	-108.256	-108.25	-108.237	-108.237	-108.215	-108.738	-108.31	-108.302	-108.302	-108.284	-108.284	-108.276	-108.738	-108.401	-108.392	-108.392	-108.374	-108.374	-108.367		2.13	-0.52408	-0.0399763	-0.0399763	-0.0346472	-0.0214347	-0.0214347	0.000339511	-0.484997	-0.0548327	-0.0473193	-0.0473193	-0.0299514	-0.0299514	-0.0217549	-0.393392	-0.0541953	-0.0455816	-0.0455816	-0.0281274	-0.0281274	-0.0206823
	2.11	-0.0589294	0.918244	-108.736	-108.257	-108.257	-108.251	-108.237	-108.237	-108.215	-108.736	-108.311	-108.303	-108.303	-108.285	-108.285	-108.277	-108.736	-108.401	-108.393	-108.393	-108.375	-108.375	-108.367		2.12	-0.52277	-0.0408899	-0.0408899	-0.0351923	-0.021838	-0.021838	0.000179167	-0.483687	-0.0557317	-0.0483022	-0.0483022	-0.0304733	-0.0304733	-0.0223443	-0.392082	-0.0550638	-0.0465303	-0.0465303	-0.0286112	-0.0286112	-0.0212153
	2.1	-0.0569625	0.918635	-108.735	-108.258	-108.258	-108.251	-108.237	-108.237	-108.215	-108.735	-108.311	-108.304	-108.304	-108.285	-108.285	-108.277	-108.735	-108.402	-108.394	-108.394	-108.375	-108.375	-108.368		2.11	-0.521417	-0.0418233	-0.0418233	-0.0357482	-0.0222443	-0.0222443	1.66341e-05	-0.482334	-0.0566461	-0.0493055	-0.0493055	-0.0310003	-0.0310003	-0.0229432	-0.390728	-0.0559466	-0.047499	-0.047499	-0.0290996	-0.0290996	-0.0217561
	2.09	-0.054957	0.919045	-108.733	-108.259	-108.259	-108.252	-108.238	-108.238	-108.215	-108.733	-108.312	-108.305	-108.305	-108.286	-108.286	-108.278	-108.733	-108.403	-108.395	-108.395	-108.376	-108.376	-108.368		2.1	-0.520019	-0.042777	-0.042777	-0.0363151	-0.0226535	-0.0226535	-0.000148039	-0.480936	-0.0575762	-0.0503299	-0.0503299	-0.0315321	-0.0315321	-0.0235517	-0.38933	-0.0568441	-0.0484881	-0.0484881	-0.0295922	-0.0295922	-0.0223048
	2.08	-0.0529119	0.919474	-108.732	-108.26	-108.26	-108.252	-108.238	-108.238	-108.215	-108.732	-108.313	-108.306	-108.306	-108.287	-108.287	-108.279	-108.732	-108.404	-108.396	-108.396	-108.376	-108.376	-108.369		2.09	-0.518575	-0.0437516	-0.0437516	-0.0368936	-0.0230653	-0.0230653	-0.000314803	-0.479491	-0.0585223	-0.0513757	-0.0513757	-0.0320689	-0.0320689	-0.0241698	-0.387886	-0.0577568	-0.0494982	-0.0494982	-0.0300892	-0.0300892	-0.0228616
	2.07	-0.0508263	0.919921	-108.73	-108.261	-108.261	-108.253	-108.239	-108.239	-108.215	-108.73	-108.314	-108.307	-108.307	-108.287	-108.287	-108.279	-108.73	-108.405	-108.397	-108.397	-108.377	-108.377	-108.37		2.08	-0.517083	-0.0447475	-0.0447475	-0.0374842	-0.0234798	-0.0234798	-0.000483605	-0.478	-0.0594851	-0.0524438	-0.0524438	-0.0326105	-0.0326105	-0.0247977	-0.386394	-0.0586851	-0.0505299	-0.0505299	-0.0305904	-0.0305904	-0.0234263
	2.06	-0.0486993	0.920386	-108.729	-108.262	-108.262	-108.254	-108.239	-108.239	-108.216	-108.729	-108.315	-108.309	-108.309	-108.288	-108.288	-108.28	-108.729	-108.406	-108.398	-108.398	-108.377	-108.377	-108.37		2.07	-0.515542	-0.0457653	-0.0457653	-0.0380874	-0.0238966	-0.0238966	-0.000654392	-0.476459	-0.060465	-0.0535347	-0.0535347	-0.033157	-0.033157	-0.0254353	-0.384854	-0.0596294	-0.0515838	-0.0515838	-0.0310958	-0.0310958	-0.0239992
	2.05	-0.04653	0.920871	-108.727	-108.263	-108.263	-108.254	-108.24	-108.24	-108.216	-108.727	-108.316	-108.31	-108.31	-108.288	-108.288	-108.281	-108.727	-108.407	-108.399	-108.399	-108.378	-108.378	-108.371		2.06	-0.513951	-0.0468053	-0.0468053	-0.0387036	-0.0243156	-0.0243156	-0.000827111	-0.474868	-0.0614624	-0.054649	-0.054649	-0.0337082	-0.0337082	-0.0260828	-0.383262	-0.0605904	-0.0526604	-0.0526604	-0.0316053	-0.0316053	-0.0245803
	2.04	-0.0443173	0.921373	-108.725	-108.264	-108.264	-108.255	-108.24	-108.24	-108.216	-108.725	-108.317	-108.311	-108.311	-108.289	-108.289	-108.281	-108.725	-108.408	-108.4	-108.4	-108.378	-108.378	-108.371		2.05	-0.512307	-0.0478682	-0.0478682	-0.0393336	-0.0247366	-0.0247366	-0.0010017	-0.473224	-0.0624779	-0.0557875	-0.0557875	-0.0342641	-0.0342641	-0.0267403	-0.381619	-0.0615685	-0.0537605	-0.0537605	-0.0321188	-0.0321188	-0.0251696
	2.03	-0.0420601	0.921894	-108.724	-108.265	-108.265	-108.255	-108.24	-108.24	-108.216	-108.724	-108.318	-108.312	-108.312	-108.289	-108.289	-108.282	-108.724	-108.409	-108.402	-108.402	-108.379	-108.379	-108.372		2.04	-0.51061	-0.0489545	-0.0489545	-0.0399777	-0.0251593	-0.0251593	-0.00117811	-0.471527	-0.0635121	-0.0569507	-0.0569507	-0.0348246	-0.0348246	-0.0274077	-0.379921	-0.0625642	-0.0548846	-0.0548846	-0.0326362	-0.0326362	-0.0257671
	2.02	-0.0397576	0.922432	-108.722	-108.266	-108.266	-108.256	-108.241	-108.241	-108.216	-108.722	-108.32	-108.313	-108.313	-108.29	-108.29	-108.283	-108.722	-108.41	-108.403	-108.403	-108.379	-108.379	-108.372		2.03	-0.508857	-0.0500646	-0.0500646	-0.0406367	-0.0255836	-0.0255836	-0.00135628	-0.469774	-0.0645656	-0.0581393	-0.0581393	-0.0353897	-0.0353897	-0.0280853	-0.378168	-0.0635781	-0.0560334	-0.0560334	-0.0331575	-0.0331575	-0.026373
	2.01	-0.0374085	0.922989	-108.72	-108.267	-108.267	-108.257	-108.241	-108.241	-108.217	-108.72	-108.321	-108.314	-108.314	-108.29	-108.29	-108.283	-108.72	-108.411	-108.404	-108.404	-108.38	-108.38	-108.373		2.02	-0.507047	-0.051199	-0.051199	-0.0413113	-0.0260092	-0.0260092	-0.00153613	-0.467964	-0.0656388	-0.0593541	-0.0593541	-0.0359593	-0.0359593	-0.028773	-0.376358	-0.0646107	-0.0572075	-0.0572075	-0.0336824	-0.0336824	-0.0269873
	2	-0.0350119	0.923564	-108.718	-108.268	-108.268	-108.258	-108.242	-108.242	-108.217	-108.718	-108.322	-108.316	-108.316	-108.291	-108.291	-108.284	-108.718	-108.412	-108.405	-108.405	-108.38	-108.38	-108.374		2.01	-0.505177	-0.0523584	-0.0523584	-0.042002	-0.0264358	-0.0264358	-0.00171762	-0.466094	-0.0667326	-0.0605958	-0.0605958	-0.0365332	-0.0365332	-0.0294709	-0.374489	-0.0656628	-0.0584076	-0.0584076	-0.0342109	-0.0342109	-0.02761
	1.99	-0.0325665	0.924155	-108.716	-108.27	-108.27	-108.258	-108.242	-108.242	-108.217	-108.716	-108.323	-108.317	-108.317	-108.292	-108.292	-108.285	-108.716	-108.413	-108.406	-108.406	-108.381	-108.381	-108.374		2	-0.503247	-0.0535431	-0.0535431	-0.0427096	-0.0268632	-0.0268632	-0.00190066	-0.464164	-0.0678475	-0.0618651	-0.0618651	-0.0371114	-0.0371114	-0.0301791	-0.372559	-0.066735	-0.0596345	-0.0596345	-0.0347428	-0.0347428	-0.0282412
	1.98	-0.0300713	0.924764	-108.714	-108.271	-108.271	-108.259	-108.243	-108.243	-108.217	-108.714	-108.324	-108.318	-108.318	-108.292	-108.292	-108.286	-108.714	-108.414	-108.408	-108.408	-108.381	-108.381	-108.375		1.99	-0.501254	-0.0547537	-0.0547537	-0.0434349	-0.027291	-0.027291	-0.00208519	-0.462171	-0.0689843	-0.0631626	-0.0631626	-0.0376938	-0.0376938	-0.0308977	-0.370565	-0.0678279	-0.0608887	-0.0608887	-0.0352781	-0.0352781	-0.0288809
	1.97	-0.0275251	0.92539	-108.712	-108.272	-108.272	-108.26	-108.243	-108.243	-108.217	-108.712	-108.325	-108.32	-108.32	-108.293	-108.293	-108.286	-108.712	-108.416	-108.409	-108.409	-108.382	-108.382	-108.376		1.98	-0.499196	-0.0559907	-0.0559907	-0.0441786	-0.0277189	-0.0277189	-0.00227113	-0.460113	-0.0701436	-0.0644893	-0.0644893	-0.0382802	-0.0382802	-0.0316267	-0.368507	-0.0689422	-0.0621709	-0.0621709	-0.0358164	-0.0358164	-0.0295292
	1.96	-0.0249266	0.926033	-108.71	-108.273	-108.273	-108.261	-108.243	-108.243	-108.217	-108.71	-108.326	-108.321	-108.321	-108.293	-108.293	-108.287	-108.71	-108.417	-108.41	-108.41	-108.382	-108.382	-108.376		1.97	-0.497071	-0.0572545	-0.0572545	-0.0449415	-0.0281466	-0.0281466	-0.00245841	-0.457988	-0.0713262	-0.0658457	-0.0658457	-0.0388706	-0.0388706	-0.0323662	-0.366382	-0.0700787	-0.0634818	-0.0634818	-0.0363578	-0.0363578	-0.0301862
	1.95	-0.0222796	0.926689	-108.707	-108.275	-108.275	-108.261	-108.244	-108.244	-108.218	-108.707	-108.328	-108.323	-108.323	-108.294	-108.294	-108.288	-108.707	-108.418	-108.412	-108.412	-108.383	-108.383	-108.377		1.96	-0.494877	-0.0585457	-0.0585457	-0.0457246	-0.0285736	-0.0285736	-0.00264695	-0.455794	-0.072533	-0.0672327	-0.0672327	-0.0394647	-0.0394647	-0.0331161	-0.364188	-0.0712382	-0.0648222	-0.0648222	-0.0369019	-0.0369019	-0.0308518
	1.94	-0.0195681	0.927366	-108.705	-108.276	-108.276	-108.262	-108.244	-108.244	-108.218	-108.705	-108.329	-108.324	-108.324	-108.295	-108.295	-108.289	-108.705	-108.419	-108.413	-108.413	-108.384	-108.384	-108.378		1.95	-0.492612	-0.059866	-0.059866	-0.0465275	-0.0290007	-0.0290007	-0.00283611	-0.453528	-0.0737646	-0.0686511	-0.0686511	-0.0400625	-0.0400625	-0.0338766	-0.361923	-0.0724212	-0.0661927	-0.0661927	-0.0374485	-0.0374485	-0.0315257
	1.93	-0.0168106	0.928053	-108.703	-108.277	-108.277	-108.263	-108.245	-108.245	-108.218	-108.703	-108.33	-108.325	-108.325	-108.295	-108.295	-108.289	-108.703	-108.42	-108.415	-108.415	-108.384	-108.384	-108.378		1.94	-0.490273	-0.0612121	-0.0612121	-0.0473545	-0.0294244	-0.0294244	-0.00302738	-0.45119	-0.075022	-0.0701014	-0.0701014	-0.0406636	-0.0406636	-0.0346478	-0.359584	-0.0736292	-0.0675941	-0.0675941	-0.0379976	-0.0379976	-0.032209
	1.92	-0.0139907	0.928757	-108.7	-108.279	-108.279	-108.264	-108.245	-108.245	-108.218	-108.7	-108.332	-108.327	-108.327	-108.296	-108.296	-108.29	-108.7	-108.422	-108.416	-108.416	-108.385	-108.385	-108.379		1.93	-0.487858	-0.0625896	-0.0625896	-0.0482023	-0.0298484	-0.0298484	-0.00321872	-0.448775	-0.0763062	-0.0715847	-0.0715847	-0.0412681	-0.0412681	-0.0354296	-0.35717	-0.0748623	-0.0690268	-0.0690268	-0.0385487	-0.0385487	-0.0329004
	1.91	-0.0111122	0.929475	-108.698	-108.28	-108.28	-108.265	-108.246	-108.246	-108.218	-108.698	-108.333	-108.329	-108.329	-108.296	-108.296	-108.291	-108.698	-108.423	-108.417	-108.417	-108.385	-108.385	-108.38		1.92	-0.485366	-0.0639949	-0.0639949	-0.0490751	-0.030269	-0.030269	-0.00341142	-0.446282	-0.077618	-0.0731015	-0.0731015	-0.0418756	-0.0418756	-0.0362221	-0.354677	-0.076122	-0.0704918	-0.0704918	-0.0391017	-0.0391017	-0.0336009
	1.9	-0.00817365	0.930207	-108.695	-108.282	-108.282	-108.266	-108.246	-108.246	-108.219	-108.695	-108.334	-108.33	-108.33	-108.297	-108.297	-108.292	-108.695	-108.424	-108.419	-108.419	-108.386	-108.386	-108.381		1.91	-0.482792	-0.0654299	-0.0654299	-0.0499728	-0.0306869	-0.0306869	-0.00360489	-0.443709	-0.0789583	-0.0746526	-0.0746526	-0.0424859	-0.0424859	-0.0370253	-0.352104	-0.077409	-0.0719897	-0.0719897	-0.0396563	-0.0396563	-0.0343102
	1.89	-0.00517364	0.930951	-108.692	-108.283	-108.283	-108.267	-108.246	-108.246	-108.219	-108.692	-108.336	-108.332	-108.332	-108.298	-108.298	-108.293	-108.692	-108.426	-108.421	-108.421	-108.386	-108.386	-108.381		1.9	-0.480136	-0.0668949	-0.0668949	-0.0508965	-0.0311014	-0.0311014	-0.00379904	-0.441052	-0.0803283	-0.0762388	-0.0762388	-0.0430989	-0.0430989	-0.0378392	-0.349447	-0.0787244	-0.073521	-0.073521	-0.0402122	-0.0402122	-0.0350282
	1.88	-0.00211073	0.931708	-108.689	-108.285	-108.285	-108.268	-108.247	-108.247	-108.219	-108.689	-108.337	-108.333	-108.333	-108.298	-108.298	-108.293	-108.689	-108.427	-108.422	-108.422	-108.387	-108.387	-108.382		1.89	-0.477393	-0.0683904	-0.0683904	-0.0518473	-0.0315122	-0.0315122	-0.00399376	-0.43831	-0.081729	-0.0778609	-0.0778609	-0.0437141	-0.0437141	-0.0386639	-0.346704	-0.080069	-0.0750866	-0.0750866	-0.0407691	-0.0407691	-0.035755
	1.87	0.00101654	0.932475	-108.686	-108.286	-108.286	-108.269	-108.247	-108.247	-108.219	-108.686	-108.339	-108.335	-108.335	-108.299	-108.299	-108.294	-108.686	-108.428	-108.424	-108.424	-108.387	-108.387	-108.383		1.88	-0.474562	-0.0699167	-0.0699167	-0.0528264	-0.0319186	-0.0319186	-0.0041889	-0.435479	-0.0831614	-0.0795194	-0.0795194	-0.0443315	-0.0443315	-0.0394993	-0.343873	-0.0814441	-0.0766869	-0.0766869	-0.0413265	-0.0413265	-0.0364905
	1.86	0.00421127	0.931847	-108.683	-108.288	-108.288	-108.27	-108.248	-108.248	-108.219	-108.683	-108.34	-108.337	-108.337	-108.299	-108.299	-108.295	-108.683	-108.43	-108.425	-108.425	-108.388	-108.388	-108.383		1.87	-0.471639	-0.0714741	-0.0714741	-0.053835	-0.0323199	-0.0323199	-0.00438436	-0.432556	-0.0846267	-0.0812153	-0.0812153	-0.0449505	-0.0449505	-0.0403455	-0.340951	-0.0828507	-0.0783227	-0.0783227	-0.0418842	-0.0418842	-0.0372348
	1.85	0.00747168	0.930804	-108.68	-108.289	-108.289	-108.271	-108.248	-108.248	-108.22	-108.68	-108.342	-108.339	-108.339	-108.3	-108.3	-108.296	-108.68	-108.431	-108.427	-108.427	-108.389	-108.389	-108.384		1.86	-0.468622	-0.0730625	-0.0730625	-0.0548732	-0.032715	-0.032715	-0.00457895	-0.429539	-0.0861257	-0.0829488	-0.0829488	-0.0455707	-0.0455707	-0.041202	-0.337934	-0.0842899	-0.0799945	-0.0799945	-0.0424418	-0.0424418	-0.0379877
	1.84	0.0108018	0.929759	-108.677	-108.291	-108.291	-108.272	-108.248	-108.248	-108.22	-108.677	-108.343	-108.34	-108.34	-108.301	-108.301	-108.297	-108.677	-108.433	-108.429	-108.429	-108.389	-108.389	-108.385		1.85	-0.465508	-0.0746832	-0.0746832	-0.0559445	-0.0331045	-0.0331045	-0.00477452	-0.426425	-0.0876603	-0.0847212	-0.0847212	-0.0461923	-0.0461923	-0.0420696	-0.33482	-0.0857629	-0.081703	-0.081703	-0.0429988	-0.0429988	-0.0387493
	1.83	0.0142022	0.928712	-108.674	-108.293	-108.293	-108.273	-108.249	-108.249	-108.22	-108.674	-108.345	-108.342	-108.342	-108.301	-108.301	-108.298	-108.674	-108.434	-108.431	-108.431	-108.39	-108.39	-108.386		1.84	-0.462293	-0.076336	-0.076336	-0.0570488	-0.033487	-0.033487	-0.00496982	-0.42321	-0.0892314	-0.0865329	-0.0865329	-0.0468145	-0.0468145	-0.0429479	-0.331605	-0.087271	-0.0834487	-0.0834487	-0.0435547	-0.0435547	-0.0395196
	1.82	0.0176741	0.927663	-108.67	-108.295	-108.295	-108.274	-108.249	-108.249	-108.22	-108.67	-108.346	-108.344	-108.344	-108.302	-108.302	-108.299	-108.67	-108.436	-108.433	-108.433	-108.39	-108.39	-108.387		1.83	-0.458975	-0.0780213	-0.0780213	-0.0581882	-0.0338619	-0.0338619	-0.00516509	-0.419892	-0.0908405	-0.0883848	-0.0883848	-0.0474372	-0.0474372	-0.043837	-0.328287	-0.0888154	-0.0852321	-0.0852321	-0.0441092	-0.0441092	-0.0402984
	1.81	0.0212203	0.926613	-108.667	-108.296	-108.296	-108.275	-108.249	-108.249	-108.22	-108.667	-108.348	-108.346	-108.346	-108.303	-108.303	-108.3	-108.667	-108.438	-108.434	-108.434	-108.391	-108.391	-108.387		1.82	-0.45555	-0.0797393	-0.0797393	-0.0593633	-0.0342283	-0.0342283	-0.00535967	-0.416467	-0.0924886	-0.0902769	-0.0902769	-0.0480595	-0.0480595	-0.0447365	-0.324861	-0.0903973	-0.0870538	-0.0870538	-0.0446616	-0.0446616	-0.0410856
	1.8	0.0248422	0.925563	-108.663	-108.298	-108.298	-108.277	-108.25	-108.25	-108.221	-108.663	-108.35	-108.348	-108.348	-108.303	-108.303	-108.3	-108.663	-108.439	-108.436	-108.436	-108.391	-108.391	-108.388		1.81	-0.452015	-0.0814902	-0.0814902	-0.0605759	-0.0345856	-0.0345856	-0.00555367	-0.412931	-0.0941773	-0.0922104	-0.0922104	-0.0486813	-0.0486813	-0.0456467	-0.321326	-0.0920181	-0.0889142	-0.0889142	-0.0452114	-0.0452114	-0.0418812
	1.79	0.0285409	0.924514	-108.659	-108.3	-108.3	-108.278	-108.25	-108.25	-108.221	-108.659	-108.352	-108.35	-108.35	-108.304	-108.304	-108.301	-108.659	-108.441	-108.438	-108.438	-108.392	-108.392	-108.389		1.8	-0.448365	-0.0832741	-0.0832741	-0.0618273	-0.0349329	-0.0349329	-0.00574679	-0.409282	-0.0959079	-0.0941856	-0.0941856	-0.049302	-0.049302	-0.0465675	-0.317677	-0.0936791	-0.0908138	-0.0908138	-0.045758	-0.045758	-0.0426851
	1.78	0.0323182	0.923465	-108.656	-108.302	-108.302	-108.279	-108.25	-108.25	-108.221	-108.656	-108.353	-108.352	-108.352	-108.304	-108.304	-108.302	-108.656	-108.443	-108.44	-108.44	-108.392	-108.392	-108.39		1.79	-0.444598	-0.0850914	-0.0850914	-0.063119	-0.0352693	-0.0352693	-0.00593889	-0.405515	-0.0976819	-0.096203	-0.096203	-0.0499209	-0.0499209	-0.0474986	-0.31391	-0.0953817	-0.092753	-0.092753	-0.0463007	-0.0463007	-0.0434972
	1.77	0.0361773	0.922419	-108.652	-108.304	-108.304	-108.281	-108.251	-108.251	-108.221	-108.652	-108.355	-108.354	-108.354	-108.305	-108.305	-108.303	-108.652	-108.444	-108.442	-108.442	-108.393	-108.393	-108.391		1.78	-0.440711	-0.0869423	-0.0869423	-0.0644529	-0.0355942	-0.0355942	-0.00613001	-0.401627	-0.0995008	-0.0982633	-0.0982633	-0.0505378	-0.0505378	-0.0484402	-0.310022	-0.0971273	-0.0947322	-0.0947322	-0.046839	-0.046839	-0.0443173
	1.76	0.0401185	0.921376	-108.647	-108.306	-108.306	-108.282	-108.251	-108.251	-108.221	-108.647	-108.357	-108.356	-108.356	-108.306	-108.306	-108.304	-108.647	-108.446	-108.444	-108.444	-108.393	-108.393	-108.391		1.77	-0.436698	-0.0888264	-0.0888264	-0.0658291	-0.0359061	-0.0359061	-0.00631883	-0.397615	-0.101366	-0.100367	-0.100367	-0.0511514	-0.0511514	-0.0493917	-0.306009	-0.0989172	-0.0967517	-0.0967517	-0.047372	-0.047372	-0.0451451
	1.75	0.0441428	0.920337	-108.643	-108.308	-108.308	-108.284	-108.251	-108.251	-108.222	-108.643	-108.359	-108.359	-108.359	-108.306	-108.306	-108.305	-108.643	-108.448	-108.446	-108.446	-108.394	-108.394	-108.392		1.76	-0.432556	-0.0907443	-0.0907443	-0.0672505	-0.0362045	-0.0362045	-0.00650623	-0.393473	-0.103278	-0.102513	-0.102513	-0.0517617	-0.0517617	-0.0503535	-0.301867	-0.100753	-0.0988118	-0.0988118	-0.0478989	-0.0478989	-0.0459807
	1.74	0.0482551	0.919304	-108.639	-108.309	-108.309	-108.285	-108.252	-108.252	-108.222	-108.639	-108.361	-108.361	-108.361	-108.307	-108.307	-108.306	-108.639	-108.45	-108.449	-108.449	-108.394	-108.394	-108.393		1.75	-0.428281	-0.0926963	-0.0926963	-0.0687184	-0.0364885	-0.0364885	-0.00669181	-0.389198	-0.105241	-0.104704	-0.104704	-0.0523677	-0.0523677	-0.0513254	-0.297593	-0.102636	-0.100913	-0.100913	-0.048419	-0.048419	-0.0468238
	1.73	0.052453	0.918276	-108.634	-108.312	-108.312	-108.287	-108.252	-108.252	-108.222	-108.634	-108.363	-108.363	-108.363	-108.307	-108.307	-108.307	-108.634	-108.452	-108.451	-108.451	-108.395	-108.395	-108.394		1.74	-0.423869	-0.0946817	-0.0946817	-0.0702337	-0.0367566	-0.0367566	-0.00687454	-0.384786	-0.107253	-0.10694	-0.10694	-0.0529685	-0.0529685	-0.052307	-0.29318	-0.104568	-0.103055	-0.103055	-0.0489314	-0.0489314	-0.0476741
	1.72	0.0567446	0.917256	-108.629	-108.314	-108.314	-108.288	-108.252	-108.252	-108.222	-108.629	-108.365	-108.365	-108.365	-108.308	-108.308	-108.308	-108.629	-108.454	-108.453	-108.453	-108.395	-108.395	-108.395		1.73	-0.419315	-0.0967013	-0.0967013	-0.0717987	-0.0370083	-0.0370083	-0.00705505	-0.380232	-0.109319	-0.109219	-0.109219	-0.0535634	-0.0535634	-0.0532983	-0.288627	-0.106549	-0.105238	-0.105238	-0.0494351	-0.0494351	-0.0485315
	1.71	0.0611224	0.916244	-108.625	-108.316	-108.316	-108.29	-108.252	-108.252	-108.222	-108.625	-108.368	-108.368	-108.368	-108.309	-108.309	-108.309	-108.625	-108.456	-108.455	-108.455	-108.396	-108.396	-108.396		1.72	-0.414616	-0.0987542	-0.0987542	-0.0734139	-0.0372416	-0.0372416	-0.00723186	-0.375532	-0.111544	-0.111544	-0.111437	-0.0542992	-0.0541515	-0.0541515	-0.283927	-0.108583	-0.107462	-0.107462	-0.049929	-0.049929	-0.0493956
	1.7	0.0655977	0.915242	-108.62	-108.318	-108.318	-108.292	-108.252	-108.252	-108.222	-108.62	-108.37	-108.37	-108.37	-108.31	-108.309	-108.309	-108.62	-108.458	-108.458	-108.458	-108.397	-108.396	-108.396		1.71	-0.409765	-0.100842	-0.100842	-0.0750821	-0.0374567	-0.0374567	-0.00740602	-0.370682	-0.113913	-0.113913	-0.113612	-0.0553093	-0.0547317	-0.0547317	-0.279077	-0.110669	-0.109728	-0.109728	-0.0504121	-0.0504121	-0.0502661
	1.69	0.0701673	0.914252	-108.614	-108.32	-108.32	-108.293	-108.253	-108.253	-108.223	-108.614	-108.373	-108.373	-108.372	-108.311	-108.31	-108.31	-108.614	-108.461	-108.46	-108.46	-108.398	-108.397	-108.397		1.7	-0.404759	-0.102962	-0.102962	-0.0768037	-0.037651	-0.037651	-0.0075759	-0.365676	-0.116328	-0.116328	-0.115843	-0.0563287	-0.0553032	-0.0553032	-0.274071	-0.112809	-0.112035	-0.112035	-0.0511428	-0.0508833	-0.0508833
	1.68	0.0748332	0.913274	-108.609	-108.322	-108.322	-108.295	-108.253	-108.253	-108.223	-108.609	-108.375	-108.375	-108.374	-108.312	-108.31	-108.31	-108.609	-108.463	-108.462	-108.462	-108.398	-108.397	-108.397		1.69	-0.399593	-0.105116	-0.105116	-0.0785802	-0.0378238	-0.0378238	-0.00774122	-0.36051	-0.118787	-0.118787	-0.118131	-0.0573566	-0.0558644	-0.0558644	-0.268905	-0.115005	-0.114383	-0.114383	-0.0520252	-0.0513412	-0.0513412
	1.67	0.0795968	0.91231	-108.604	-108.324	-108.324	-108.297	-108.253	-108.253	-108.223	-108.604	-108.378	-108.378	-108.377	-108.313	-108.311	-108.311	-108.604	-108.465	-108.465	-108.465	-108.399	-108.398	-108.398		1.68	-0.394262	-0.107304	-0.107304	-0.0804139	-0.0379741	-0.0379741	-0.00790228	-0.355179	-0.121291	-0.121291	-0.12048	-0.0583934	-0.0564145	-0.0564145	-0.263573	-0.117258	-0.116773	-0.116773	-0.052913	-0.0517846	-0.0517846
	1.66	0.0844675	0.911364	-108.598	-108.327	-108.327	-108.299	-108.253	-108.253	-108.223	-108.598	-108.38	-108.38	-108.379	-108.314	-108.311	-108.311	-108.598	-108.467	-108.467	-108.467	-108.4	-108.398	-108.398		1.67	-0.38876	-0.109525	-0.109525	-0.082306	-0.0381004	-0.0381004	-0.00805836	-0.349677	-0.12384	-0.12384	-0.122889	-0.0594387	-0.0569522	-0.0569522	-0.258072	-0.119569	-0.119202	-0.119202	-0.0538057	-0.052212	-0.052212
	1.65	0.0894332	0.910433	-108.592	-108.329	-108.329	-108.301	-108.253	-108.253	-108.223	-108.592	-108.383	-108.383	-108.382	-108.315	-108.312	-108.312	-108.592	-108.47	-108.47	-108.47	-108.401	-108.399	-108.399		1.66	-0.383083	-0.111778	-0.111778	-0.0842565	-0.0381998	-0.0381998	-0.00820747	-0.343999	-0.126434	-0.126434	-0.12536	-0.0604919	-0.0574759	-0.0574759	-0.252394	-0.121939	-0.121672	-0.121672	-0.0547029	-0.0526218	-0.0526218
	1.64	0.0945075	0.909523	-108.586	-108.331	-108.331	-108.303	-108.253	-108.253	-108.223	-108.586	-108.386	-108.386	-108.384	-108.317	-108.312	-108.312	-108.586	-108.472	-108.472	-108.472	-108.402	-108.399	-108.399		1.65	-0.377224	-0.114065	-0.114065	-0.086269	-0.0382738	-0.0382738	-0.00835151	-0.338141	-0.129072	-0.129072	-0.127895	-0.0615532	-0.0579844	-0.0579844	-0.246535	-0.124369	-0.124182	-0.124182	-0.0556041	-0.0530126	-0.0530126
	1.63	0.0996838	0.908635	-108.58	-108.334	-108.334	-108.305	-108.253	-108.253	-108.223	-108.58	-108.388	-108.388	-108.387	-108.318	-108.313	-108.313	-108.58	-108.475	-108.475	-108.475	-108.403	-108.399	-108.399		1.64	-0.371178	-0.116383	-0.116383	-0.0883428	-0.0383182	-0.0383182	-0.00848771	-0.332095	-0.131753	-0.131753	-0.130493	-0.0626219	-0.0584756	-0.0584756	-0.24049	-0.126861	-0.126732	-0.126732	-0.0565086	-0.0533824	-0.0533824
	1.62	0.104971	0.90777	-108.573	-108.336	-108.336	-108.307	-108.253	-108.253	-108.224	-108.573	-108.391	-108.391	-108.39	-108.319	-108.313	-108.313	-108.573	-108.478	-108.477	-108.477	-108.404	-108.4	-108.4		1.63	-0.36494	-0.118734	-0.118734	-0.0904801	-0.0383329	-0.0383329	-0.00861662	-0.325856	-0.134478	-0.134478	-0.133157	-0.0636976	-0.0589479	-0.0589479	-0.234251	-0.129414	-0.12932	-0.12932	-0.057416	-0.0537294	-0.0537294
	1.61	0.110364	0.906932	-108.567	-108.338	-108.338	-108.31	-108.253	-108.253	-108.224	-108.567	-108.394	-108.394	-108.393	-108.32	-108.314	-108.314	-108.567	-108.48	-108.48	-108.48	-108.405	-108.4	-108.4		1.62	-0.358503	-0.121115	-0.121115	-0.0926819	-0.038315	-0.038315	-0.00873687	-0.319419	-0.137246	-0.137246	-0.135887	-0.0647805	-0.0593999	-0.0593999	-0.227814	-0.13203	-0.131945	-0.131945	-0.0583256	-0.0540516	-0.0540516
	1.6	0.115867	0.90612	-108.56	-108.341	-108.341	-108.312	-108.253	-108.253	-108.224	-108.56	-108.397	-108.397	-108.395	-108.321	-108.314	-108.314	-108.56	-108.483	-108.483	-108.483	-108.406	-108.4	-108.4		1.61	-0.351861	-0.123528	-0.123528	-0.0949489	-0.0382639	-0.0382639	-0.00884779	-0.312778	-0.140055	-0.140055	-0.138683	-0.0658696	-0.0598288	-0.0598288	-0.221172	-0.13471	-0.134608	-0.134608	-0.0592366	-0.0543469	-0.0543469
	1.59	0.121483	0.905343	-108.553	-108.343	-108.343	-108.314	-108.253	-108.253	-108.224	-108.553	-108.4	-108.4	-108.398	-108.322	-108.315	-108.315	-108.553	-108.486	-108.486	-108.486	-108.407	-108.4	-108.4		1.6	-0.345008	-0.125971	-0.125971	-0.0972832	-0.0381773	-0.0381773	-0.00894915	-0.305925	-0.142905	-0.142905	-0.141546	-0.0669654	-0.0602332	-0.0602332	-0.21432	-0.137453	-0.137307	-0.137307	-0.0601485	-0.0546128	-0.0546128
	1.58	0.127216	0.904597	-108.545	-108.346	-108.346	-108.317	-108.253	-108.253	-108.224	-108.545	-108.403	-108.403	-108.401	-108.323	-108.315	-108.315	-108.545	-108.489	-108.488	-108.488	-108.407	-108.401	-108.401		1.59	-0.337938	-0.128444	-0.128444	-0.0996837	-0.0380527	-0.0380527	-0.00903843	-0.298855	-0.145795	-0.145795	-0.144477	-0.0680665	-0.0606099	-0.0606099	-0.20725	-0.14026	-0.14004	-0.14004	-0.0610603	-0.0548469	-0.0548469
	1.57	0.133057	0.90389	-108.538	-108.348	-108.348	-108.32	-108.252	-108.252	-108.224	-108.538	-108.406	-108.406	-108.404	-108.324	-108.315	-108.315	-108.538	-108.492	-108.491	-108.491	-108.408	-108.401	-108.401		1.58	-0.330644	-0.130944	-0.130944	-0.102152	-0.0378877	-0.0378877	-0.00911513	-0.291561	-0.148724	-0.148724	-0.147475	-0.0691735	-0.0609573	-0.0609573	-0.199955	-0.143131	-0.142807	-0.142807	-0.0619712	-0.0550465	-0.0550465
	1.56	0.139015	0.903223	-108.53	-108.351	-108.351	-108.322	-108.252	-108.252	-108.224	-108.53	-108.409	-108.409	-108.408	-108.325	-108.315	-108.315	-108.53	-108.495	-108.494	-108.494	-108.409	-108.401	-108.401		1.57	-0.323119	-0.133473	-0.133473	-0.10469	-0.0376819	-0.0376819	-0.00917943	-0.284036	-0.151691	-0.151691	-0.150541	-0.0702857	-0.0612723	-0.0612723	-0.19243	-0.146065	-0.145605	-0.145605	-0.0628805	-0.0552088	-0.0552088
	1.55	0.145088	0.9026	-108.522	-108.353	-108.353	-108.325	-108.252	-108.252	-108.224	-108.522	-108.412	-108.412	-108.411	-108.326	-108.316	-108.316	-108.522	-108.498	-108.497	-108.497	-108.41	-108.401	-108.401		1.56	-0.315356	-0.136029	-0.136029	-0.107297	-0.0374314	-0.0374314	-0.00922833	-0.276273	-0.154693	-0.154693	-0.153674	-0.0714027	-0.0615517	-0.0615517	-0.184668	-0.149064	-0.148434	-0.148434	-0.0637871	-0.0553307	-0.0553307
	1.54	0.151277	0.902025	-108.514	-108.356	-108.356	-108.328	-108.252	-108.252	-108.224	-108.514	-108.415	-108.415	-108.414	-108.328	-108.316	-108.316	-108.514	-108.501	-108.5	-108.5	-108.411	-108.401	-108.401		1.55	-0.307349	-0.13861	-0.13861	-0.109973	-0.0371342	-0.0371342	-0.00926099	-0.268265	-0.157729	-0.157729	-0.156874	-0.0725241	-0.0617925	-0.0617925	-0.17666	-0.152124	-0.151291	-0.151291	-0.06469	-0.0554088	-0.0554088
	1.53	0.157582	0.901503	-108.505	-108.359	-108.359	-108.33	-108.251	-108.251	-108.224	-108.505	-108.418	-108.418	-108.417	-108.329	-108.316	-108.316	-108.505	-108.504	-108.503	-108.503	-108.412	-108.401	-108.401		1.54	-0.299089	-0.141215	-0.141215	-0.112719	-0.036788	-0.036788	-0.00927603	-0.260006	-0.160797	-0.160797	-0.16014	-0.0736501	-0.0619916	-0.0619916	-0.1684	-0.155247	-0.154174	-0.154174	-0.0655883	-0.0554397	-0.0554397
	1.52	0.164003	0.901037	-108.497	-108.361	-108.361	-108.333	-108.251	-108.251	-108.224	-108.497	-108.421	-108.421	-108.421	-108.33	-108.316	-108.316	-108.497	-108.507	-108.506	-108.506	-108.413	-108.401	-108.401		1.53	-0.29057	-0.143844	-0.143844	-0.115535	-0.0363898	-0.0363898	-0.00927166	-0.251486	-0.163896	-0.163896	-0.163471	-0.0747802	-0.0621452	-0.0621452	-0.159881	-0.158431	-0.157082	-0.157082	-0.066481	-0.0554195	-0.0554195
	1.51	0.170543	0.900634	-108.488	-108.364	-108.364	-108.336	-108.25	-108.25	-108.224	-108.488	-108.424	-108.424	-108.424	-108.331	-108.316	-108.316	-108.488	-108.51	-108.508	-108.508	-108.414	-108.401	-108.401		1.52	-0.281783	-0.146494	-0.146494	-0.11842	-0.035937	-0.035937	-0.00924618	-0.2427	-0.167022	-0.167022	-0.166866	-0.0759147	-0.0622496	-0.0622496	-0.151094	-0.161674	-0.16001	-0.16001	-0.0673671	-0.0553441	-0.0553441
	1.5	0.177192	0.900295	-108.478	-108.367	-108.367	-108.339	-108.25	-108.25	-108.224	-108.478	-108.428	-108.427	-108.427	-108.332	-108.316	-108.316	-108.478	-108.514	-108.511	-108.511	-108.415	-108.401	-108.401		1.51	-0.272722	-0.149163	-0.149163	-0.121374	-0.0354256	-0.0354256	-0.00919641	-0.233638	-0.170322	-0.170173	-0.170173	-0.0770529	-0.0623001	-0.0623001	-0.142033	-0.164975	-0.162957	-0.162957	-0.0682453	-0.0552093	-0.0552093
	1.49	0.183956	0.900029	-108.469	-108.369	-108.369	-108.342	-108.249	-108.249	-108.224	-108.469	-108.431	-108.43	-108.43	-108.333	-108.316	-108.316	-108.469	-108.517	-108.514	-108.514	-108.415	-108.4	-108.4		1.5	-0.263378	-0.151853	-0.151853	-0.1244	-0.0348557	-0.0348557	-0.00912398	-0.224294	-0.17384	-0.173348	-0.173348	-0.0781972	-0.062294	-0.062294	-0.132689	-0.168331	-0.16592	-0.16592	-0.0691149	-0.0550104	-0.0550104
	1.48	0.190835	0.899844	-108.459	-108.372	-108.372	-108.345	-108.248	-108.248	-108.224	-108.459	-108.435	-108.434	-108.434	-108.334	-108.316	-108.316	-108.459	-108.521	-108.517	-108.517	-108.416	-108.4	-108.4		1.49	-0.253743	-0.154557	-0.154557	-0.127492	-0.0342202	-0.0342202	-0.00902273	-0.214659	-0.177415	-0.176541	-0.176541	-0.0793456	-0.0622246	-0.0622246	-0.123054	-0.171741	-0.168895	-0.168895	-0.0699748	-0.0547424	-0.0547424
	1.47	0.197823	0.899745	-108.448	-108.375	-108.375	-108.349	-108.248	-108.248	-108.224	-108.448	-108.439	-108.437	-108.437	-108.336	-108.316	-108.316	-108.448	-108.524	-108.52	-108.52	-108.417	-108.399	-108.399		1.48	-0.243809	-0.157276	-0.157276	-0.130651	-0.033517	-0.033517	-0.00889058	-0.204725	-0.181046	-0.179749	-0.179749	-0.0804996	-0.0620876	-0.0620876	-0.11312	-0.175202	-0.171879	-0.171879	-0.070824	-0.0543999	-0.0543999
	1.46	0.204918	0.899736	-108.438	-108.378	-108.378	-108.352	-108.247	-108.247	-108.223	-108.438	-108.442	-108.44	-108.44	-108.337	-108.315	-108.315	-108.438	-108.528	-108.523	-108.523	-108.418	-108.399	-108.399		1.47	-0.233567	-0.160005	-0.160005	-0.133876	-0.0327415	-0.0327415	-0.00872502	-0.194484	-0.184729	-0.18297	-0.18297	-0.08166	-0.0618774	-0.0618774	-0.102879	-0.17871	-0.174867	-0.174867	-0.0716615	-0.0539773	-0.0539773
	1.45	0.212117	0.899829	-108.427	-108.38	-108.38	-108.355	-108.246	-108.246	-108.223	-108.427	-108.446	-108.443	-108.443	-108.338	-108.315	-108.315	-108.427	-108.531	-108.526	-108.526	-108.419	-108.398	-108.398		1.46	-0.22301	-0.162745	-0.162745	-0.137166	-0.0318921	-0.0318921	-0.00852503	-0.183927	-0.188462	-0.186199	-0.186199	-0.0828293	-0.0615891	-0.0615891	-0.0923219	-0.182262	-0.177855	-0.177855	-0.0724869	-0.0534685	-0.0534685
	1.44	0.219418	0.900031	-108.416	-108.383	-108.383	-108.359	-108.245	-108.245	-108.223	-108.416	-108.45	-108.447	-108.447	-108.339	-108.315	-108.315	-108.416	-108.535	-108.529	-108.529	-108.42	-108.398	-108.398		1.45	-0.212129	-0.16549	-0.16549	-0.140519	-0.0309626	-0.0309626	-0.00828509	-0.173046	-0.19224	-0.189432	-0.189432	-0.084008	-0.0612158	-0.0612158	-0.0814409	-0.185855	-0.180839	-0.180839	-0.0732996	-0.052867	-0.052867
	1.43	0.226815	0.900353	-108.404	-108.386	-108.386	-108.362	-108.244	-108.244	-108.222	-108.404	-108.454	-108.45	-108.45	-108.34	-108.314	-108.314	-108.404	-108.539	-108.532	-108.532	-108.42	-108.397	-108.397		1.44	-0.200916	-0.168239	-0.168239	-0.143934	-0.0299497	-0.0299497	-0.00800276	-0.161833	-0.19606	-0.192664	-0.192664	-0.0851991	-0.0607514	-0.0607514	-0.0702273	-0.189484	-0.183814	-0.183814	-0.0740992	-0.0521659	-0.0521659
	1.42	0.2343	0.900803	-108.392	-108.389	-108.389	-108.366	-108.242	-108.242	-108.222	-108.392	-108.458	-108.453	-108.453	-108.342	-108.313	-108.313	-108.392	-108.542	-108.535	-108.535	-108.421	-108.396	-108.396		1.43	-0.189361	-0.17099	-0.17099	-0.147406	-0.028849	-0.028849	-0.00767419	-0.150278	-0.199917	-0.195891	-0.195891	-0.0864056	-0.060189	-0.060189	-0.0586725	-0.193144	-0.186774	-0.186774	-0.0748859	-0.0513579	-0.0513579
	1.41	0.241869	0.901392	-108.38	-108.391	-108.391	-108.369	-108.241	-108.241	-108.222	-108.38	-108.462	-108.456	-108.456	-108.343	-108.313	-108.313	-108.38	-108.546	-108.538	-108.538	-108.422	-108.395	-108.395		1.42	-0.177457	-0.173735	-0.173735	-0.150934	-0.0276536	-0.0276536	-0.00729385	-0.138373	-0.203806	-0.199105	-0.199105	-0.08763	-0.0595204	-0.0595204	-0.0467681	-0.196831	-0.189713	-0.189713	-0.0756598	-0.050435	-0.050435
	1.4	0.249517	0.902134	-108.367	-108.394	-108.394	-108.373	-108.24	-108.24	-108.221	-108.367	-108.466	-108.459	-108.459	-108.344	-108.312	-108.312	-108.367	-108.55	-108.541	-108.541	-108.423	-108.394	-108.394		1.41	-0.165194	-0.176474	-0.176474	-0.154514	-0.0263606	-0.0263606	-0.00685876	-0.126111	-0.207721	-0.202302	-0.202302	-0.0888779	-0.0587387	-0.0587387	-0.0345054	-0.200539	-0.192626	-0.192626	-0.076422	-0.0493889	-0.0493889
	1.39	0.25723	0.90304	-108.354	-108.397	-108.397	-108.377	-108.238	-108.238	-108.221	-108.354	-108.47	-108.463	-108.463	-108.345	-108.311	-108.311	-108.354	-108.553	-108.544	-108.544	-108.423	-108.392	-108.392		1.4	-0.152565	-0.179203	-0.179203	-0.158144	-0.0249649	-0.0249649	-0.00636387	-0.113482	-0.211658	-0.205476	-0.205476	-0.0901546	-0.0578359	-0.0578359	-0.0218762	-0.204261	-0.195504	-0.195504	-0.0771738	-0.0482107	-0.0482107
	1.38	0.265003	0.904125	-108.341	-108.399	-108.399	-108.38	-108.237	-108.237	-108.22	-108.341	-108.473	-108.466	-108.466	-108.347	-108.31	-108.31	-108.341	-108.557	-108.547	-108.547	-108.424	-108.391	-108.391		1.39	-0.139561	-0.181917	-0.181917	-0.161819	-0.0234596	-0.0234596	-0.00580341	-0.100477	-0.215609	-0.208619	-0.208619	-0.0914658	-0.0568024	-0.0568024	-0.0088721	-0.207991	-0.198341	-0.198341	-0.0779173	-0.046891	-0.046891
	1.37	0.272821	0.905403	-108.327	-108.402	-108.402	-108.384	-108.235	-108.235	-108.219	-108.327	-108.477	-108.469	-108.469	-108.348	-108.308	-108.308	-108.327	-108.561	-108.549	-108.549	-108.425	-108.389	-108.389		1.38	-0.126174	-0.184609	-0.184609	-0.165533	-0.021838	-0.021838	-0.00517051	-0.0870904	-0.219566	-0.211724	-0.211724	-0.0928184	-0.0556287	-0.0556287	0.00451495	-0.211722	-0.201129	-0.201129	-0.0786556	-0.0454198	-0.0454198
	1.36	0.280676	0.906889	-108.313	-108.405	-108.405	-108.388	-108.233	-108.233	-108.218	-108.313	-108.481	-108.472	-108.472	-108.35	-108.307	-108.307	-108.313	-108.565	-108.552	-108.552	-108.426	-108.387	-108.387		1.37	-0.112396	-0.187278	-0.187278	-0.169283	-0.0200956	-0.0200956	-0.00446048	-0.0733126	-0.223524	-0.214783	-0.214783	-0.0942217	-0.0543058	-0.0543058	0.0182928	-0.215446	-0.203859	-0.203859	-0.0793921	-0.0437865	-0.0437865
	1.35	0.28855	0.908604	-108.298	-108.407	-108.407	-108.392	-108.231	-108.231	-108.218	-108.298	-108.485	-108.475	-108.475	-108.351	-108.305	-108.305	-108.298	-108.568	-108.555	-108.555	-108.426	-108.385	-108.385		1.36	-0.0982198	-0.189916	-0.189916	-0.173062	-0.0182256	-0.0182256	-0.00366587	-0.0591365	-0.227473	-0.217788	-0.217788	-0.0956849	-0.0528229	-0.0528229	0.0324688	-0.219155	-0.206522	-0.206522	-0.0801316	-0.0419796	-0.0419796
	1.34	0.296428	0.910565	-108.283	-108.41	-108.41	-108.395	-108.229	-108.229	-108.217	-108.283	-108.489	-108.477	-108.477	-108.353	-108.303	-108.303	-108.283	-108.572	-108.557	-108.557	-108.427	-108.383	-108.383		1.35	-0.0836385	-0.192518	-0.192518	-0.176864	-0.0162204	-0.0162204	-0.0027789	-0.0445552	-0.231405	-0.220729	-0.220729	-0.0972178	-0.0511688	-0.0511688	0.0470501	-0.22284	-0.20911	-0.20911	-0.0808804	-0.0399875	-0.0399875
	1.33	0.304294	0.912792	-108.268	-108.412	-108.412	-108.399	-108.227	-108.227	-108.216	-108.268	-108.493	-108.48	-108.48	-108.354	-108.301	-108.301	-108.268	-108.576	-108.56	-108.56	-108.428	-108.381	-108.381		1.34	-0.0686453	-0.195078	-0.195078	-0.180682	-0.0140729	-0.0140729	-0.00179122	-0.0295621	-0.23531	-0.223598	-0.223598	-0.0988317	-0.0493319	-0.0493319	0.0620432	-0.22649	-0.21161	-0.21161	-0.081645	-0.0377975	-0.0377975
	1.32	0.312129	0.915306	-108.252	-108.415	-108.415	-108.403	-108.224	-108.224	-108.214	-108.252	-108.497	-108.483	-108.483	-108.356	-108.299	-108.299	-108.252	-108.579	-108.562	-108.562	-108.429	-108.378	-108.378		1.33	-0.0532346	-0.197589	-0.197589	-0.184507	-0.0117759	-0.0117759	-0.000694304	-0.0141514	-0.239179	-0.226383	-0.226383	-0.100538	-0.0473002	-0.0473002	0.077454	-0.230097	-0.214013	-0.214013	-0.0824337	-0.0353962	-0.0353962
	1.31	0.319912	0.91813	-108.236	-108.417	-108.417	-108.407	-108.222	-108.222	-108.213	-108.236	-108.501	-108.486	-108.486	-108.358	-108.296	-108.296	-108.236	-108.583	-108.564	-108.564	-108.43	-108.375	-108.375		1.32	-0.0374011	-0.200045	-0.200045	-0.188331	-0.00932151	-0.00932151	0.00052188	0.00168209	-0.243	-0.229074	-0.229074	-0.102349	-0.0450607	-0.0450607	0.0932875	-0.233649	-0.216306	-0.216306	-0.0832558	-0.03277	-0.03277
	1.3	0.327621	0.921288	-108.219	-108.42	-108.42	-108.411	-108.219	-108.219	-108.211	-108.219	-108.504	-108.488	-108.488	-108.36	-108.294	-108.294	-108.219	-108.586	-108.566	-108.566	-108.431	-108.372	-108.372		1.31	-0.0211407	-0.202439	-0.202439	-0.192145	-0.00670218	-0.00670217	0.00186757	0.0179425	-0.246762	-0.231659	-0.231659	-0.104274	-0.0426003	-0.0426003	0.109548	-0.237134	-0.218478	-0.218478	-0.0841216	-0.0299041	-0.0299041
	1.29	0.33523	0.921195	-108.202	-108.422	-108.422	-108.415	-108.216	-108.216	-108.21	-108.202	-108.508	-108.49	-108.49	-108.362	-108.291	-108.291	-108.202	-108.589	-108.568	-108.568	-108.432	-108.369	-108.369		1.3	-0.00445028	-0.204762	-0.204762	-0.195937	-0.00390699	-0.00390699	0.00335607	0.0346329	-0.250452	-0.234125	-0.234125	-0.106322	-0.0399039	-0.0399039	0.126238	-0.24054	-0.220514	-0.220514	-0.0850415	-0.0267833	-0.0267833
	1.28	0.34272	0.914865	-108.185	-108.424	-108.424	-108.418	-108.213	-108.213	-108.208	-108.185	-108.511	-108.493	-108.493	-108.365	-108.288	-108.288	-108.185	-108.593	-108.57	-108.57	-108.433	-108.365	-108.365		1.29	0.0126722	-0.207004	-0.207004	-0.199693	-0.000926732	-0.000926732	0.00500046	0.0517554	-0.254057	-0.236458	-0.236458	-0.1085	-0.0369568	-0.0369568	0.143361	-0.243854	-0.222402	-0.222402	-0.0860257	-0.0233916	-0.0233916
	1.27	0.350056	0.908343	-108.167	-108.426	-108.426	-108.422	-108.209	-108.209	-108.206	-108.167	-108.515	-108.495	-108.495	-108.367	-108.284	-108.284	-108.167	-108.596	-108.571	-108.571	-108.434	-108.361	-108.361		1.28	0.0302272	-0.209159	-0.209159	-0.203402	0.00224639	0.00224639	0.00681428	0.0693104	-0.257564	-0.238646	-0.238646	-0.110813	-0.0337444	-0.0337444	0.160916	-0.247062	-0.224127	-0.224127	-0.0870851	-0.0197129	-0.0197129
	1.26	0.357218	0.901631	-108.148	-108.428	-108.428	-108.425	-108.206	-108.206	-108.204	-108.148	-108.518	-108.496	-108.496	-108.37	-108.28	-108.28	-108.148	-108.599	-108.573	-108.573	-108.435	-108.357	-108.357		1.27	0.0482138	-0.211214	-0.211214	-0.207046	0.00562595	0.00562595	0.00881453	0.087297	-0.260956	-0.240672	-0.240672	-0.113259	-0.0302493	-0.0302493	0.178902	-0.250149	-0.225672	-0.225672	-0.0882274	-0.0157298	-0.0157298
	1.25	0.364182	0.894729	-108.129	-108.43	-108.43	-108.429	-108.202	-108.202	-108.201	-108.129	-108.521	-108.498	-108.498	-108.372	-108.276	-108.276	-108.129	-108.601	-108.574	-108.574	-108.436	-108.352	-108.352		1.26	0.0666296	-0.213161	-0.213161	-0.210611	0.00922197	0.00922197	0.0110192	0.105713	-0.264219	-0.24252	-0.24252	-0.115833	-0.0264556	-0.0264556	0.197318	-0.253101	-0.227023	-0.227023	-0.0894587	-0.0114256	-0.0114256
	1.24	0.370917	0.887636	-108.11	-108.432	-108.431	-108.431	-108.199	-108.198	-108.198	-108.11	-108.524	-108.5	-108.5	-108.375	-108.272	-108.272	-108.11	-108.604	-108.575	-108.575	-108.438	-108.347	-108.347		1.25	0.0854701	-0.214987	-0.214987	-0.214075	0.0130484	0.0130484	0.0134493	0.124553	-0.267335	-0.244174	-0.244174	-0.118526	-0.0223461	-0.0223461	0.216159	-0.255901	-0.228163	-0.228163	-0.0907817	-0.0067827	-0.0067827
	1.23	0.377404	0.880355	-108.09	-108.435	-108.433	-108.433	-108.196	-108.193	-108.193	-108.09	-108.527	-108.501	-108.501	-108.378	-108.267	-108.267	-108.09	-108.606	-108.575	-108.575	-108.439	-108.342	-108.342		1.24	0.104729	-0.217419	-0.216677	-0.216677	0.0161263	0.0171196	0.0171196	0.143813	-0.270288	-0.245615	-0.245615	-0.121321	-0.017903	-0.017903	0.235418	-0.258532	-0.229074	-0.229074	-0.0921947	-0.00178402	-0.00178402
	1.22	0.383621	0.872887	-108.07	-108.438	-108.434	-108.434	-108.192	-108.189	-108.189	-108.07	-108.53	-108.502	-108.502	-108.381	-108.262	-108.262	-108.07	-108.609	-108.576	-108.576	-108.441	-108.336	-108.336		1.23	0.1244	-0.220618	-0.218218	-0.218218	0.0190766	0.021453	0.021453	0.163483	-0.273057	-0.246824	-0.246824	-0.124196	-0.0131085	-0.0131085	0.255088	-0.260977	-0.22974	-0.22974	-0.0936911	0.00358711	0.00358711
	1.21	0.389553	0.865239	-108.05	-108.441	-108.436	-108.436	-108.189	-108.184	-108.184	-108.05	-108.532	-108.502	-108.502	-108.384	-108.256	-108.256	-108.05	-108.611	-108.576	-108.576	-108.442	-108.33	-108.33		1.22	0.144472	-0.223647	-0.219594	-0.219594	0.0223272	0.0260662	0.0260662	0.183555	-0.275625	-0.247782	-0.247782	-0.127127	-0.00794552	-0.00794552	0.275161	-0.263219	-0.230142	-0.230142	-0.0952588	0.00934645	0.00934645
	1.2	0.395196	0.857425	-108.029	-108.444	-108.437	-108.437	-108.185	-108.179	-108.179	-108.029	-108.534	-108.503	-108.503	-108.387	-108.25	-108.25	-108.029	-108.613	-108.576	-108.576	-108.444	-108.323	-108.323		1.21	0.164935	-0.226478	-0.220784	-0.220784	0.0259094	0.0309816	0.0309816	0.204019	-0.27797	-0.248466	-0.248466	-0.130082	-0.00239719	-0.00239719	0.295624	-0.265238	-0.230262	-0.230262	-0.0968807	0.0155081	0.0155081
	1.19	0.40054	0.849456	-108.008	-108.446	-108.437	-108.437	-108.181	-108.173	-108.173	-108.008	-108.536	-108.503	-108.503	-108.39	-108.244	-108.244	-108.008	-108.614	-108.575	-108.575	-108.446	-108.316	-108.316		1.2	0.185778	-0.229079	-0.221768	-0.221768	0.029858	0.0362256	0.0362256	0.224862	-0.280072	-0.248855	-0.248855	-0.133025	0.00355279	0.00355279	0.316467	-0.267017	-0.230082	-0.230082	-0.0985345	0.0220836	0.0220836
	1.18	0.405597	0.84136	-107.986	-108.448	-108.438	-108.438	-108.176	-108.167	-108.167	-107.986	-108.537	-108.503	-108.503	-108.393	-108.237	-108.237	-107.986	-108.615	-108.574	-108.574	-108.447	-108.309	-108.309		1.19	0.20699	-0.231422	-0.222519	-0.222519	0.0342189	0.0418289	0.0418289	0.246073	-0.281908	-0.248926	-0.248926	-0.135913	0.00991714	0.00991714	0.337679	-0.268534	-0.229584	-0.229584	-0.100193	0.0290817	0.0290817
	1.17	0.41037	0.83316	-107.964	-108.45	-108.438	-108.438	-108.171	-108.161	-108.161	-107.964	-108.539	-108.502	-108.502	-108.395	-108.23	-108.23	-107.964	-108.616	-108.573	-108.573	-108.449	-108.301	-108.301		1.18	0.228559	-0.233462	-0.223015	-0.223015	0.0390034	0.0478199	0.0478199	0.267643	-0.283459	-0.248653	-0.248653	-0.138717	0.0167065	0.0167065	0.359248	-0.269769	-0.228747	-0.228747	-0.101826	0.0365056	0.0365056
	1.16	0.414882	0.824889	-107.942	-108.451	-108.438	-108.438	-108.165	-108.154	-108.154	-107.942	-108.54	-108.501	-108.501	-108.398	-108.222	-108.217	-107.942	-108.617	-108.571	-108.571	-108.45	-108.294	-108.293		1.17	0.250478	-0.235174	-0.223217	-0.223217	0.0442803	0.0542434	0.0542434	0.289561	-0.284698	-0.248012	-0.248012	-0.141378	0.0239266	0.0239266	0.381166	-0.270703	-0.227553	-0.227553	-0.103398	0.0443522	0.0443522
	1.15	0.41915	0.816589	-107.919	-108.452	-108.437	-108.437	-108.158	-108.146	-108.146	-107.919	-108.54	-108.499	-108.499	-108.4	-108.214	-108.211	-107.919	-108.617	-108.57	-108.57	-108.452	-108.289	-108.284		1.16	0.27274	-0.236516	-0.223094	-0.223094	0.0500845	0.0611419	0.0611419	0.311823	-0.285604	-0.246978	-0.246978	-0.143856	0.0315743	0.0365146	0.403429	-0.27131	-0.225981	-0.225981	-0.104873	0.0511543	0.0526091
	1.14	0.4232	0.808303	-107.897	-108.453	-108.437	-108.437	-108.151	-108.138	-108.138	-107.897	-108.54	-108.498	-108.498	-108.402	-108.206	-108.205	-107.897	-108.617	-108.567	-108.567	-108.453	-108.283	-108.275		1.15	0.295346	-0.237454	-0.222603	-0.222603	0.056459	0.0685642	0.0685642	0.334429	-0.286149	-0.245521	-0.245521	-0.1461	0.039638	0.0424789	0.426034	-0.271569	-0.22401	-0.22401	-0.106211	0.0566734	0.0612518
	1.13	0.427052	0.800074	-107.873	-108.453	-108.435	-108.435	-108.144	-108.13	-108.13	-107.873	-108.54	-108.495	-108.495	-108.404	-108.197	-108.197	-107.873	-108.616	-108.564	-108.564	-108.454	-108.276	-108.266		1.14	0.3183	-0.23795	-0.221704	-0.221704	0.0634469	0.0765628	0.0765628	0.357383	-0.286309	-0.243613	-0.243613	-0.148064	0.0480918	0.0491183	0.448988	-0.271453	-0.221615	-0.221615	-0.10737	0.0628995	0.0702415
	1.12	0.430729	0.791948	-107.85	-108.452	-108.433	-108.433	-108.135	-108.12	-108.12	-107.85	-108.539	-108.492	-108.492	-108.405	-108.189	-108.188	-107.85	-108.615	-108.561	-108.561	-108.454	-108.268	-108.256		1.13	0.341614	-0.237968	-0.220349	-0.220349	0.0710921	0.0851955	0.0851955	0.380697	-0.286055	-0.241222	-0.241222	-0.149698	0.0564497	0.0568961	0.472303	-0.270933	-0.218769	-0.218769	-0.108307	0.0698501	0.0795248
	1.11	0.434247	0.783966	-107.825	-108.451	-108.431	-108.431	-108.126	-108.11	-108.11	-107.825	-108.538	-108.489	-108.489	-108.406	-108.181	-108.179	-107.825	-108.614	-108.557	-108.557	-108.455	-108.259	-108.247		1.12	0.36531	-0.237475	-0.21849	-0.21849	0.0794356	0.0945196	0.0945206	0.404393	-0.285357	-0.238316	-0.238316	-0.150953	0.0644922	0.0660011	0.495998	-0.269979	-0.215443	-0.215443	-0.108975	0.0775458	0.0890422
	1.1	0.437617	0.776165	-107.801	-108.45	-108.428	-108.428	-108.116	-108.099	-108.099	-107.801	-108.536	-108.485	-108.485	-108.406	-108.171	-108.169	-107.801	-108.612	-108.553	-108.553	-108.455	-108.25	-108.237		1.11	0.389416	-0.236436	-0.216077	-0.216076	0.0885164	0.104594	0.104594	0.428499	-0.284183	-0.234859	-0.234859	-0.151782	0.0732681	0.0753614	0.520105	-0.268556	-0.211602	-0.211602	-0.109325	0.0860113	0.0987473
	1.09	0.440847	0.768573	-107.776	-108.447	-108.424	-108.424	-108.106	-108.088	-108.088	-107.776	-108.534	-108.48	-108.48	-108.406	-108.161	-108.159	-107.776	-108.61	-108.548	-108.548	-108.454	-108.24	-108.227		1.1	0.413972	-0.234816	-0.213056	-0.213056	0.0983765	0.11548	0.11548	0.453055	-0.282497	-0.230813	-0.230813	-0.152135	0.0828049	0.0849597	0.54466	-0.266626	-0.207209	-0.207209	-0.109308	0.0952755	0.108633
	1.08	0.443937	0.761214	-107.75	-108.445	-108.42	-108.42	-108.094	-108.075	-108.075	-107.75	-108.531	-108.475	-108.475	-108.405	-108.15	-108.149	-107.75	-108.607	-108.542	-108.542	-108.453	-108.229	-108.216		1.09	0.439024	-0.232581	-0.209375	-0.209375	0.109055	0.127236	0.127236	0.478107	-0.280261	-0.226137	-0.226137	-0.151966	0.0931339	0.0948247	0.569713	-0.264149	-0.202221	-0.202221	-0.108871	0.105372	0.118746
	1.07	0.446892	0.754104	-107.724	-108.441	-108.415	-108.415	-108.082	-108.061	-108.061	-107.724	-108.528	-108.469	-108.469	-108.404	-108.138	-108.138	-107.724	-108.603	-108.536	-108.536	-108.452	-108.217	-108.205		1.08	0.464629	-0.229694	-0.20498	-0.20498	0.120593	0.139919	0.139919	0.503712	-0.277433	-0.220786	-0.220786	-0.151225	0.104292	0.105033	0.595317	-0.261081	-0.19659	-0.19659	-0.107959	0.116339	0.12918
	1.06	0.449699	0.747255	-107.697	-108.437	-108.409	-108.409	-108.068	-108.047	-108.047	-107.697	-108.524	-108.462	-108.462	-108.402	-108.127	-108.125	-107.697	-108.598	-108.529	-108.529	-108.45	-108.204	-108.194		1.07	0.49085	-0.226116	-0.199817	-0.199817	0.133032	0.153583	0.153583	0.529933	-0.273967	-0.214712	-0.214712	-0.149862	0.115692	0.11632	0.621538	-0.257372	-0.190266	-0.190266	-0.106514	0.128218	0.140052
	1.05	0.452364	0.740667	-107.669	-108.432	-108.402	-108.402	-108.054	-108.031	-108.031	-107.669	-108.519	-108.454	-108.454	-108.399	-108.115	-108.115	-107.669	-108.593	-108.521	-108.521	-108.447	-108.182	-108.182		1.06	0.517758	-0.221806	-0.193827	-0.193827	0.146417	0.168284	0.168284	0.556842	-0.269813	-0.207863	-0.207863	-0.147826	0.126917	0.129265	0.648447	-0.252972	-0.183193	-0.183193	-0.104476	0.141058	0.151483
	1.04	0.454878	0.73434	-107.641	-108.426	-108.394	-108.394	-108.039	-108.014	-108.014	-107.641	-108.513	-108.446	-108.446	-108.395	-108.102	-108.102	-107.641	-108.587	-108.512	-108.512	-108.444	-108.169	-108.169		1.05	0.545432	-0.216718	-0.186954	-0.186954	0.160796	0.18407	0.18407	0.584516	-0.264919	-0.200185	-0.200185	-0.145063	0.138819	0.138819	0.676121	-0.247826	-0.175311	-0.175311	-0.101785	0.163584	0.163584
	1.03	0.457237	0.728268	-107.611	-108.419	-108.385	-108.385	-108.022	-107.996	-107.996	-107.611	-108.507	-108.436	-108.436	-108.391	-108.089	-108.089	-107.611	-108.581	-108.502	-108.502	-108.44	-108.155	-108.155		1.04	0.573955	-0.210801	-0.179138	-0.179138	0.176221	0.200982	0.200982	0.613038	-0.259229	-0.191617	-0.191617	-0.141518	0.151501	0.151501	0.704644	-0.241875	-0.166559	-0.166559	-0.0983745	0.176461	0.176461
	1.02	0.45944	0.722445	-107.581	-108.411	-108.375	-108.375	-108.004	-107.977	-107.977	-107.581	-108.499	-108.425	-108.425	-108.386	-108.074	-108.074	-107.581	-108.573	-108.492	-108.492	-108.435	-108.141	-108.141		1.03	0.603415	-0.204004	-0.170316	-0.170316	0.192748	0.219054	0.219054	0.642499	-0.252681	-0.182097	-0.182097	-0.13713	0.165058	0.165058	0.734104	-0.235058	-0.156868	-0.156868	-0.0941787	0.190206	0.190206
	1.01	0.461485	0.71686	-107.549	-108.402	-108.364	-108.364	-107.985	-107.956	-107.956	-107.549	-108.491	-108.414	-108.414	-108.379	-108.059	-108.059	-107.549	-108.564	-108.48	-108.48	-108.429	-108.125	-108.125		1.02	0.633906	-0.196266	-0.160423	-0.160423	0.210438	0.238296	0.238296	0.672989	-0.245212	-0.171559	-0.171559	-0.131837	0.17958	0.17958	0.764594	-0.22731	-0.146169	-0.146169	-0.0891277	0.20491	0.20491
	1	0.463372	0.711504	-107.516	-108.393	-108.352	-108.352	-107.965	-107.935	-107.935	-107.516	-108.481	-108.401	-108.401	-108.372	-108.042	-108.042	-107.516	-108.554	-108.467	-108.467	-108.422	-108.108	-108.108		1.01	0.665524	-0.187526	-0.14939	-0.14939	0.229355	0.258684	0.258684	0.704607	-0.236752	-0.159931	-0.159931	-0.125574	0.195154	0.195154	0.796212	-0.218561	-0.134387	-0.134387	-0.083149	0.220659	0.220659
	0.99	0.465102	0.706364	-107.482	-108.382	-108.338	-108.338	-107.944	-107.912	-107.912	-107.482	-108.47	-108.387	-108.387	-108.364	-108.024	-108.024	-107.482	-108.543	-108.453	-108.453	-108.414	-108.09	-108.09		1	0.698371	-0.177714	-0.137146	-0.137146	0.24957	0.280125	0.280125	0.737454	-0.22723	-0.147139	-0.147139	-0.118268	0.211864	0.211864	0.82906	-0.208741	-0.121446	-0.121446	-0.076167	0.23754	0.23754
	0.98	0.466675	0.701431	-107.447	-108.369	-108.324	-108.324	-107.921	-107.89	-107.889	-107.447	-108.459	-108.372	-108.372	-108.354	-108.005	-108.005	-107.447	-108.531	-108.437	-108.437	-108.404	-108.07	-108.07
	0.97	0.468097	0.696693	-107.409	-108.356	-108.307	-108.307	-107.896	-107.866	-107.866	-107.409	-108.445	-108.355	-108.355	-108.343	-107.984	-107.984	-107.409	-108.518	-108.42	-108.42	-108.394	-108.05	-108.05
	0.96	0.46937	0.692142	-107.371	-108.341	-108.289	-108.289	-107.87	-107.842	-107.842	-107.371	-108.431	-108.337	-108.337	-108.331	-107.962	-107.962	-107.371	-108.503	-108.402	-108.402	-108.382	-108.027	-108.027
	0.95	0.470498	0.687765	-107.33	-108.325	-108.27	-108.27	-107.842	-107.817	-107.817	-107.33	-108.415	-108.317	-108.317	-108.317	-107.938	-107.938	-107.33	-108.486	-108.382	-108.382	-108.369	-108.003	-108.003
	0.94	0.471486	0.683556	-107.287	-108.307	-108.248	-108.248	-107.812	-107.79	-107.79	-107.287	-108.397	-108.302	-108.295	-108.295	-107.913	-107.913	-107.287	-108.468	-108.36	-108.36	-108.354	-107.978	-107.978
	0.93	0.472338	0.679506	-107.243	-108.287	-108.225	-108.225	-107.78	-107.762	-107.762	-107.243	-108.378	-108.285	-108.272	-108.272	-107.886	-107.886	-107.243	-108.449	-108.338	-108.337	-108.337	-107.951	-107.951
	0.92	0.473057	0.675608	-107.196	-108.266	-108.2	-108.2	-107.747	-107.733	-107.733	-107.196	-108.357	-108.266	-108.246	-108.246	-107.857	-107.857	-107.196	-108.427	-108.319	-108.311	-108.311	-107.921	-107.921
	0.91	0.473648	0.671858	-107.147	-108.242	-108.173	-108.173	-107.711	-107.701	-107.701	-107.147	-108.333	-108.246	-108.219	-108.219	-107.825	-107.825	-107.147	-108.404	-108.299	-108.283	-108.283	-107.89	-107.89
	0.9	0.474118	0.668246	-107.095	-108.217	-108.144	-108.144	-107.672	-107.667	-107.667	-107.095	-108.308	-108.223	-108.189	-108.189	-107.792	-107.792	-107.095	-108.378	-108.277	-108.254	-108.254	-107.856	-107.856
	0.89	0.474468	0.664768	-107.041	-108.189	-108.112	-108.112	-107.632	-107.632	-107.632	-107.041	-108.281	-108.198	-108.157	-108.157	-107.756	-107.756	-107.041	-108.35	-108.253	-108.222	-108.222	-107.821	-107.821
	0.88	0.468087	0.672854	-107.192	-108.18	-108.116	-108.068	-107.776	-107.75	-107.633	-107.192	-108.277	-108.212	-108.135	-108.086	-107.844	-107.83	-107.192	-108.316	-108.248	-108.179	-108.156	-107.883	-107.865
	0.87	0.468247	0.669428	-107.143	-108.149	-108.088	-108.033	-107.739	-107.713	-107.597	-107.143	-108.245	-108.184	-108.099	-108.05	-107.807	-107.793	-107.143	-108.284	-108.219	-108.142	-108.12	-107.845	-107.827
	0.86	0.468311	0.6661	-107.091	-108.115	-108.058	-107.994	-107.7	-107.675	-107.559	-107.091	-108.21	-108.153	-108.059	-108.01	-107.766	-107.753	-107.091	-108.25	-108.188	-108.102	-108.081	-107.805	-107.787
	0.85	0.468284	0.662864	-107.035	-108.079	-108.025	-107.952	-107.657	-107.633	-107.518	-107.035	-108.173	-108.119	-108.017	-107.968	-107.723	-107.71	-107.035	-108.212	-108.154	-108.06	-108.038	-107.761	-107.744
	0.84	0.468169	0.659718	-106.977	-108.039	-107.989	-107.908	-107.612	-107.588	-107.473	-106.977	-108.133	-108.082	-107.972	-107.923	-107.677	-107.664	-106.977	-108.172	-108.117	-108.014	-107.993	-107.715	-107.698
	0.83	0.467967	0.656658	-106.915	-107.996	-107.95	-107.86	-107.563	-107.54	-107.426	-106.915	-108.09	-108.042	-107.923	-107.875	-107.628	-107.615	-106.915	-108.128	-108.077	-107.965	-107.944	-107.665	-107.649
	0.82	0.467677	0.653685	-106.849	-107.95	-107.907	-107.808	-107.511	-107.489	-107.375	-106.849	-108.043	-107.999	-107.871	-107.823	-107.576	-107.563	-106.849	-108.081	-108.034	-107.912	-107.892	-107.612	-107.596
	0.81	0.467304	0.650793	-106.78	-107.9	-107.861	-107.752	-107.456	-107.434	-107.32	-106.78	-107.993	-107.953	-107.815	-107.767	-107.519	-107.507	-106.78	-108.03	-107.987	-107.856	-107.836	-107.556	-107.54
	0.8	0.466848	0.647981	-106.706	-107.847	-107.811	-107.693	-107.396	-107.375	-107.262	-106.706	-107.938	-107.902	-107.755	-107.707	-107.459	-107.448	-106.706	-107.976	-107.936	-107.795	-107.776	-107.495	-107.48
	0.79	0.466315	0.645241	-106.628	-107.789	-107.757	-107.629	-107.333	-107.313	-107.2	-106.628	-107.88	-107.848	-107.691	-107.643	-107.395	-107.384	-106.628	-107.918	-107.881	-107.731	-107.711	-107.431	-107.417
	0.78	0.465687	0.640346	-106.545	-107.727	-107.699	-107.561	-107.265	-107.245	-107.133	-106.545	-107.818	-107.789	-107.622	-107.574	-107.327	-107.316	-106.545	-107.855	-107.823	-107.662	-107.643	-107.363	-107.348
	0.77	0.464983	0.633901	-106.457	-107.661	-107.636	-107.488	-107.193	-107.174	-107.062	-106.457	-107.751	-107.726	-107.548	-107.501	-107.254	-107.244	-106.457	-107.788	-107.759	-107.588	-107.569	-107.289	-107.276
	0.76	0.464196	0.627382	-106.364	-107.589	-107.568	-107.41	-107.116	-107.097	-106.985	-106.364	-107.679	-107.658	-107.47	-107.423	-107.177	-107.166	-106.364	-107.716	-107.691	-107.509	-107.491	-107.212	-107.198
	0.75	0.463326	0.62079	-106.266	-107.513	-107.495	-107.326	-107.034	-107.016	-106.904	-106.266	-107.602	-107.584	-107.386	-107.339	-107.094	-107.084	-106.266	-107.639	-107.618	-107.424	-107.407	-107.129	-107.116
	0.74	0.462372	0.614125	-106.161	-107.431	-107.417	-107.237	-106.946	-106.929	-106.817	-106.161	-107.52	-107.506	-107.296	-107.249	-107.006	-106.997	-106.161	-107.556	-107.539	-107.334	-107.317	-107.04	-107.028
	0.73	0.461335	0.607389	-106.051	-107.343	-107.333	-107.142	-106.853	-106.836	-106.724	-106.051	-107.432	-107.421	-107.2	-107.153	-106.913	-106.903	-106.051	-107.468	-107.454	-107.238	-107.221	-106.946	-106.934
	0.72	0.460213	0.600582	-105.934	-107.249	-107.242	-107.04	-106.754	-106.737	-106.626	-105.934	-107.338	-107.331	-107.098	-107.051	-106.813	-106.804	-105.934	-107.373	-107.364	-107.136	-107.119	-106.846	-106.834
	0.71	0.459003	0.593707	-105.81	-107.149	-107.145	-106.931	-106.648	-106.631	-106.52	-105.81	-107.237	-107.233	-106.989	-106.942	-106.706	-106.698	-105.81	-107.272	-107.266	-107.026	-107.01	-106.74	-106.728
	0.7	0.457703	0.586764	-105.678	-107.041	-107.041	-106.815	-106.535	-106.519	-106.408	-105.678	-107.129	-107.129	-106.873	-106.826	-106.593	-106.585	-105.678	-107.165	-107.162	-106.91	-106.893	-106.626	-106.615
	0.69	0.456314	0.579756	-105.539	-106.93	-106.927	-106.691	-106.415	-106.399	-106.289	-105.539	-107.018	-107.014	-106.749	-106.702	-106.473	-106.465	-105.539	-107.05	-107.049	-106.785	-106.769	-106.505	-106.495
	0.68	0.454834	0.572683	-105.391	-106.81	-106.804	-106.559	-106.287	-106.271	-106.161	-105.391	-106.898	-106.891	-106.616	-106.569	-106.345	-106.337	-105.391	-106.931	-106.927	-106.652	-106.637	-106.377	-106.367
	0.67	0.453264	0.565548	-105.235	-106.682	-106.673	-106.418	-106.151	-106.135	-106.026	-105.235	-106.77	-106.76	-106.475	-106.428	-106.208	-106.201	-105.235	-106.803	-106.795	-106.511	-106.496	-106.24	-106.231
	0.66	0.451595	0.558351	-105.07	-106.545	-106.534	-106.267	-106.006	-105.99	-105.881	-105.07	-106.633	-106.621	-106.325	-106.278	-106.063	-106.056	-105.07	-106.666	-106.655	-106.36	-106.345	-106.095	-106.086
	0.65	0.449819	0.551094	-104.894	-106.399	-106.384	-106.107	-105.851	-105.836	-105.728	-104.894	-106.486	-106.472	-106.164	-106.117	-105.908	-105.902	-104.894	-106.519	-106.506	-106.199	-106.185	-105.94	-105.931
	0.64	0.438941	0.548555	-104.739	-106.252	-106.226	-105.935	-105.696	-105.689	-105.575	-104.739	-106.329	-106.309	-105.988	-105.945	-105.746	-105.74	-104.739	-106.365	-106.347	-106.024	-106.011	-105.779	-105.771
	0.63	0.445979	0.536411	-104.511	-106.074	-106.056	-105.753	-105.512	-105.497	-105.39	-104.511	-106.162	-106.143	-105.811	-105.763	-105.569	-105.563	-104.511	-106.195	-106.178	-105.845	-105.831	-105.6	-105.592
	0.62	0.443904	0.528987	-104.302	-105.894	-105.876	-105.559	-105.326	-105.311	-105.205	-104.302	-105.983	-105.963	-105.616	-105.569	-105.383	-105.377	-104.302	-106.016	-105.997	-105.651	-105.637	-105.414	-105.406
	0.61	0.441703	0.521508	-104.081	-105.702	-105.683	-105.352	-105.127	-105.113	-105.008	-104.081	-105.791	-105.771	-105.409	-105.361	-105.185	-105.179	-104.081	-105.825	-105.805	-105.444	-105.43	-105.216	-105.208
	0.6	0.409609	0.540007	-103.897	-105.509	-105.478	-105.131	-104.926	-104.921	-104.81	-103.897	-105.585	-105.562	-105.183	-105.141	-104.975	-104.97	-103.897	-105.621	-105.599	-105.218	-105.206	-105.007	-105.001
	0.59	0.436947	0.506396	-103.598	-105.278	-105.26	-104.895	-104.692	-104.678	-104.576	-103.598	-105.367	-105.348	-104.953	-104.905	-104.75	-104.744	-103.598	-105.402	-105.382	-104.987	-104.974	-104.78	-104.773
	0.58	0.394708	0.535149	-103.395	-105.056	-105.027	-104.645	-104.463	-104.46	-104.352	-103.395	-105.132	-105.113	-104.697	-104.655	-104.512	-104.508	-103.395	-105.169	-105.149	-104.731	-104.72	-104.544	-104.538
	0.57	0.431742	0.491086	-103.056	-104.793	-104.782	-104.376	-104.199	-104.186	-104.088	-103.056	-104.884	-104.87	-104.435	-104.386	-104.257	-104.253	-103.056	-104.919	-104.904	-104.469	-104.456	-104.288	-104.281
	0.56	0.379661	0.527748	-102.829	-104.539	-104.518	-104.093	-103.939	-103.937	-103.837	-102.829	-104.615	-104.604	-104.145	-104.103	-103.988	-103.984	-102.829	-104.653	-104.64	-104.179	-104.168	-104.019	-104.014
	0.55	0.372083	0.520097	-102.521	-104.253	-104.239	-103.789	-103.652	-103.651	-103.555	-102.521	-104.33	-104.326	-103.842	-103.8	-103.701	-103.697	-102.521	-104.369	-104.362	-103.876	-103.865	-103.732	-103.727
	0.54	0.36447	0.512428	-102.194	-103.949	-103.943	-103.466	-103.348	-103.347	-103.255	-102.194	-104.031	-104.026	-103.519	-103.476	-103.396	-103.393	-102.194	-104.066	-104.065	-103.553	-103.542	-103.428	-103.423
	0.53	0.356821	0.504738	-101.847	-103.629	-103.623	-103.121	-103.025	-103.024	-102.938	-101.847	-103.717	-103.702	-103.175	-103.132	-103.073	-103.07	-101.847	-103.753	-103.741	-103.209	-103.198	-103.104	-103.099
	0.52	0.349136	0.497029	-101.48	-103.296	-103.276	-102.754	-102.683	-102.681	-102.601	-101.48	-103.385	-103.356	-102.809	-102.765	-102.73	-102.727	-101.48	-103.42	-103.396	-102.843	-102.832	-102.822	-102.761
	0.51	0.341416	0.489302	-101.092	-102.943	-102.906	-102.363	-102.321	-102.318	-102.245	-101.092	-103.032	-102.987	-102.419	-102.375	-102.367	-102.365	-101.092	-103.067	-103.027	-102.453	-102.442	-102.398	-102.394
	0.5	0.333664	0.481555	-100.681	-102.569	-102.511	-101.947	-101.938	-101.935	-101.867	-100.681	-102.658	-102.594	-102.004	-101.984	-101.982	-101.961	-100.681	-102.693	-102.635	-102.039	-102.027	-102.015	-102.011

## Sheet: 2SF Data
		CAS							1x							S								Graphing Energy Levels
		ROHF	Root 1	Root 2	Root 3	Root 4	Root 5	Root 6	ROHF	Root 1	Root 2	Root 3	Root 4	Root 5	Root 6	ROHF	Root 1	Root 2	Root 3	Root 4	Root 5	Root 6			CAS							1x							S
	4.5	-108.242	-108.206	-108.17	-108.094	-108.094	-108.094	-108.094	-108.242	-108.248	-108.253	-108.183	-108.183	-108.183	-108.183	-108.242	-108.297	-108.288	-108.223	-108.223	-108.223	-108.223			ROHF	Root 1	Root 2	Root 3	Root 4	Root 5	Root 6	ROHF	Root 1	Root 2	Root 3	Root 4	Root 5	Root 6	ROHF	Root 1	Root 2	Root 3	Root 4	Root 5	Root 6
	4.49	-108.242	-108.206	-108.17	-108.094	-108.094	-108.094	-108.094	-108.242	-108.248	-108.253	-108.183	-108.183	-108.183	-108.183	-108.242	-108.297	-108.288	-108.223	-108.223	-108.223	-108.223		4.5	-0.035918	0	0.0359181	0.112328	0.112328	0.112328	0.112328	0.00535155	0	-0.00502993	0.0642964	0.0642964	0.0643124	0.0643124	0.0550694	0	0.00955396	0.0737917	0.0737917	0.0738068	0.0738068
	4.48	-108.242	-108.206	-108.17	-108.094	-108.094	-108.094	-108.094	-108.242	-108.248	-108.253	-108.183	-108.183	-108.183	-108.183	-108.242	-108.297	-108.288	-108.224	-108.224	-108.223	-108.223		4.49	-0.0359522	-3.7228e-05	0.0358779	0.112288	0.112288	0.112289	0.112289	0.0053173	-9.1526e-06	-0.00501912	0.064264	0.064264	0.0642803	0.0642803	0.0550352	-2.32959e-05	0.00954923	0.0737612	0.0737612	0.0737768	0.0737768
	4.47	-108.242	-108.206	-108.17	-108.094	-108.094	-108.094	-108.094	-108.242	-108.248	-108.253	-108.183	-108.183	-108.183	-108.183	-108.242	-108.297	-108.288	-108.224	-108.224	-108.224	-108.224		4.48	-0.0359872	-7.5201e-05	0.0358369	0.112248	0.112248	0.112248	0.112248	0.00528236	-1.84609e-05	-0.00500802	0.064231	0.064231	0.0642476	0.0642476	0.0550003	-4.70318e-05	0.00954441	0.07373	0.07373	0.0737461	0.0737461
	4.46	-108.242	-108.206	-108.171	-108.094	-108.094	-108.094	-108.094	-108.242	-108.248	-108.253	-108.183	-108.183	-108.183	-108.183	-108.242	-108.297	-108.288	-108.224	-108.224	-108.224	-108.224		4.47	-0.0360228	-0.000113932	0.0357951	0.112207	0.112207	0.112207	0.112207	0.00524673	-2.79537e-05	-0.00499668	0.0641974	0.0641974	0.0642142	0.0642142	0.0549646	-7.12337e-05	0.00953953	0.0736982	0.0736982	0.0737148	0.0737148
	4.45	-108.242	-108.206	-108.171	-108.094	-108.094	-108.094	-108.094	-108.242	-108.248	-108.253	-108.183	-108.183	-108.183	-108.183	-108.242	-108.297	-108.288	-108.224	-108.224	-108.224	-108.224		4.46	-0.0360591	-0.000153432	0.0357524	0.112165	0.112165	0.112166	0.112166	0.0052104	-3.76461e-05	-0.00498511	0.0641631	0.0641631	0.0641803	0.0641803	0.0549283	-9.59114e-05	0.00953454	0.0736657	0.0736657	0.0736828	0.0736828
	4.44	-108.242	-108.206	-108.171	-108.094	-108.094	-108.094	-108.094	-108.242	-108.248	-108.252	-108.183	-108.183	-108.183	-108.183	-108.242	-108.297	-108.288	-108.224	-108.224	-108.224	-108.224		4.45	-0.0360962	-0.000193716	0.0357089	0.112123	0.112123	0.112123	0.112123	0.00517334	-4.75371e-05	-0.0049733	0.0641282	0.0641282	0.0641457	0.0641457	0.0548912	-0.000121074	0.00952946	0.0736326	0.0736326	0.0736502	0.0736502
	4.43	-108.242	-108.207	-108.171	-108.094	-108.094	-108.094	-108.094	-108.242	-108.248	-108.252	-108.183	-108.183	-108.183	-108.183	-108.242	-108.297	-108.288	-108.224	-108.224	-108.224	-108.224		4.44	-0.036134	-0.000234794	0.0356645	0.112079	0.112079	0.112079	0.112079	0.00513556	-5.76312e-05	-0.00496125	0.0640924	0.0640924	0.0641107	0.0641107	0.0548535	-0.000146729	0.00952428	0.0735989	0.0735989	0.073617	0.073617
	4.42	-108.242	-108.207	-108.171	-108.094	-108.094	-108.094	-108.094	-108.242	-108.248	-108.252	-108.184	-108.184	-108.183	-108.183	-108.242	-108.297	-108.288	-108.224	-108.224	-108.224	-108.224		4.43	-0.0361725	-0.000276682	0.0356193	0.112035	0.112035	0.112035	0.112035	0.00509704	-6.79309e-05	-0.00494895	0.0640542	0.0640542	0.0640766	0.0640766	0.0548149	-0.000172892	0.009519	0.0735643	0.0735643	0.0735832	0.0735832
	4.41	-108.243	-108.207	-108.171	-108.094	-108.094	-108.094	-108.094	-108.243	-108.248	-108.252	-108.184	-108.184	-108.184	-108.184	-108.243	-108.297	-108.288	-108.224	-108.224	-108.224	-108.224		4.42	-0.0362118	-0.000319391	0.0355732	0.11199	0.11199	0.11199	0.11199	0.00505776	-7.84253e-05	-0.00493643	0.064006	0.064006	0.0640513	0.0640513	0.0547757	-0.000199608	0.00951366	0.0735278	0.0735278	0.07355	0.07355
	4.4	-108.243	-108.207	-108.171	-108.094	-108.094	-108.094	-108.094	-108.243	-108.248	-108.252	-108.184	-108.184	-108.184	-108.184	-108.243	-108.297	-108.288	-108.224	-108.224	-108.224	-108.224		4.41	-0.0362518	-0.000362935	0.0355261	0.111944	0.111944	0.111944	0.111944	0.00501772	-8.91486e-05	-0.00492354	0.0639818	0.0639818	0.0640006	0.0640006	0.0547356	-0.000226716	0.00950816	0.0734934	0.0734934	0.0735131	0.0735131
	4.39	-108.243	-108.207	-108.171	-108.094	-108.094	-108.094	-108.094	-108.243	-108.248	-108.252	-108.184	-108.184	-108.184	-108.184	-108.243	-108.298	-108.288	-108.224	-108.224	-108.224	-108.224		4.4	-0.0362926	-0.000407327	0.0354782	0.111897	0.111897	0.111897	0.111897	0.0049769	-0.000100139	-0.00491055	0.0639434	0.0639434	0.0639625	0.0639625	0.0546948	-0.00025446	0.00950247	0.0734569	0.073457	0.0734772	0.0734772
	4.38	-108.243	-108.207	-108.171	-108.094	-108.094	-108.094	-108.094	-108.243	-108.248	-108.252	-108.184	-108.184	-108.184	-108.184	-108.243	-108.298	-108.288	-108.224	-108.224	-108.224	-108.224		4.39	-0.0363342	-0.000452581	0.0354293	0.111849	0.111849	0.111849	0.111849	0.00493529	-0.000111322	-0.00489724	0.0639044	0.0639044	0.0639238	0.0639238	0.0546532	-0.000282721	0.00949673	0.0734197	0.0734197	0.0734405	0.0734405
	4.37	-108.243	-108.207	-108.171	-108.095	-108.095	-108.095	-108.095	-108.243	-108.248	-108.252	-108.184	-108.184	-108.184	-108.184	-108.243	-108.298	-108.288	-108.224	-108.224	-108.224	-108.224		4.38	-0.0363767	-0.00049871	0.0353794	0.1118	0.1118	0.1118	0.1118	0.00489288	-0.000122736	-0.00488367	0.0638646	0.0638646	0.0638843	0.0638843	0.0546108	-0.000311529	0.00949087	0.0733817	0.0733817	0.0734031	0.0734031
	4.36	-108.243	-108.207	-108.171	-108.095	-108.095	-108.095	-108.095	-108.243	-108.248	-108.252	-108.184	-108.184	-108.184	-108.184	-108.243	-108.298	-108.288	-108.224	-108.224	-108.224	-108.224		4.37	-0.0364199	-0.00054573	0.0353286	0.11175	0.11175	0.11175	0.11175	0.00484965	-0.000134387	-0.00486983	0.063824	0.063824	0.0638441	0.0638441	0.0545675	-0.000340895	0.00948488	0.0733429	0.0733429	0.073365	0.073365
	4.35	-108.243	-108.207	-108.171	-108.095	-108.095	-108.095	-108.095	-108.243	-108.248	-108.252	-108.184	-108.184	-108.184	-108.184	-108.243	-108.298	-108.288	-108.224	-108.224	-108.224	-108.224		4.36	-0.0364639	-0.000593652	0.0352769	0.111699	0.111699	0.111699	0.111699	0.0048056	-0.000146282	-0.00485573	0.0637827	0.0637827	0.0638031	0.0638031	0.0545235	-0.00037083	0.00947877	0.0733034	0.0733034	0.073326	0.073326
	4.34	-108.243	-108.207	-108.171	-108.095	-108.095	-108.095	-108.095	-108.243	-108.248	-108.252	-108.184	-108.184	-108.184	-108.184	-108.243	-108.298	-108.288	-108.224	-108.224	-108.224	-108.224		4.35	-0.0365088	-0.000642493	0.0352241	0.111647	0.111647	0.111648	0.111648	0.0047607	-0.000158425	-0.00484136	0.0637405	0.0637405	0.0637615	0.0637615	0.0544786	-0.000401345	0.00947252	0.0732631	0.0732631	0.0732864	0.0732864
	4.33	-108.243	-108.207	-108.171	-108.095	-108.095	-108.095	-108.095	-108.243	-108.248	-108.252	-108.184	-108.184	-108.184	-108.184	-108.243	-108.298	-108.288	-108.224	-108.224	-108.224	-108.224		4.34	-0.0365546	-0.000692265	0.0351703	0.111595	0.111595	0.111595	0.111595	0.00471494	-0.000170821	-0.00482671	0.063697	0.063697	0.0637197	0.0637197	0.0544328	-0.000432451	0.00946613	0.073222	0.073222	0.073246	0.073246
	4.32	-108.243	-108.207	-108.171	-108.095	-108.095	-108.095	-108.095	-108.243	-108.248	-108.252	-108.184	-108.184	-108.184	-108.184	-108.243	-108.298	-108.288	-108.224	-108.224	-108.224	-108.224		4.33	-0.0366012	-0.000742984	0.0351155	0.111541	0.111541	0.111541	0.111541	0.00466832	-0.000183467	-0.0048118	0.0636483	0.0636483	0.0636814	0.0636814	0.0543862	-0.000464174	0.00945962	0.0731797	0.0731797	0.0732051	0.0732051
	4.31	-108.243	-108.207	-108.171	-108.095	-108.095	-108.095	-108.095	-108.243	-108.248	-108.252	-108.184	-108.184	-108.184	-108.184	-108.243	-108.298	-108.288	-108.224	-108.224	-108.224	-108.224		4.32	-0.0366487	-0.000794664	0.0350597	0.111486	0.111486	0.111486	0.111486	0.00462082	-0.000196358	-0.00479652	0.0636097	0.0636097	0.0636315	0.0636315	0.0543387	-0.000496436	0.009453	0.0731374	0.0731374	0.0731625	0.0731625
	4.3	-108.243	-108.207	-108.171	-108.095	-108.095	-108.095	-108.095	-108.243	-108.248	-108.252	-108.184	-108.184	-108.184	-108.184	-108.243	-108.298	-108.288	-108.224	-108.224	-108.224	-108.224		4.31	-0.0366971	-0.000847321	0.0350028	0.11143	0.11143	0.11143	0.11143	0.00457241	-0.000209592	-0.00478111	0.0635643	0.0635643	0.0635865	0.0635865	0.0542903	-0.000529402	0.0094461	0.0730939	0.0730939	0.0731197	0.0731197
	4.29	-108.243	-108.207	-108.171	-108.095	-108.095	-108.095	-108.095	-108.243	-108.248	-108.252	-108.184	-108.184	-108.184	-108.184	-108.243	-108.298	-108.288	-108.224	-108.224	-108.224	-108.224		4.3	-0.0367464	-0.000900968	0.0349448	0.111373	0.111373	0.111374	0.111374	0.0045231	-0.000223063	-0.00476535	0.0635182	0.0635182	0.0635407	0.0635407	0.054241	-0.000562973	0.00943912	0.0730495	0.0730495	0.073076	0.073076
	4.28	-108.243	-108.207	-108.171	-108.095	-108.095	-108.095	-108.095	-108.243	-108.248	-108.252	-108.184	-108.184	-108.184	-108.184	-108.243	-108.298	-108.288	-108.224	-108.224	-108.224	-108.224		4.29	-0.0367967	-0.000955622	0.0348857	0.111315	0.111315	0.111316	0.111316	0.00447287	-0.000236818	-0.0047493	0.0634712	0.0634712	0.0634941	0.0634941	0.0541908	-0.000597186	0.00943197	0.0730042	0.0730043	0.0730314	0.0730314
	4.27	-108.243	-108.207	-108.171	-108.095	-108.095	-108.095	-108.095	-108.243	-108.248	-108.252	-108.184	-108.184	-108.184	-108.184	-108.243	-108.298	-108.288	-108.224	-108.224	-108.224	-108.224		4.28	-0.0368478	-0.0010113	0.0348256	0.111256	0.111256	0.111257	0.111257	0.00442169	-0.000250862	-0.00473296	0.0634234	0.0634234	0.0634467	0.0634467	0.0541396	-0.000632055	0.00942467	0.0729581	0.0729581	0.072986	0.072986
	4.26	-108.243	-108.207	-108.172	-108.095	-108.095	-108.095	-108.095	-108.243	-108.248	-108.252	-108.184	-108.184	-108.184	-108.184	-108.243	-108.298	-108.288	-108.224	-108.224	-108.224	-108.224		4.27	-0.0369	-0.00106801	0.0347643	0.111196	0.111196	0.111197	0.111197	0.00436957	-0.000265203	-0.00471633	0.0633746	0.0633746	0.0633983	0.0633983	0.0540875	-0.00066759	0.00941719	0.0729111	0.0729111	0.0729397	0.0729397
	4.25	-108.243	-108.207	-108.172	-108.095	-108.095	-108.095	-108.095	-108.243	-108.248	-108.252	-108.184	-108.184	-108.184	-108.184	-108.243	-108.298	-108.288	-108.224	-108.224	-108.224	-108.224		4.26	-0.0369531	-0.00112578	0.0347019	0.111135	0.111135	0.111135	0.111135	0.00431647	-0.000279847	-0.0046994	0.063325	0.063325	0.0633491	0.0633491	0.0540344	-0.000703803	0.00940954	0.0728632	0.0728632	0.0728925	0.0728925
	4.24	-108.243	-108.208	-108.172	-108.095	-108.095	-108.095	-108.095	-108.243	-108.248	-108.252	-108.184	-108.184	-108.184	-108.184	-108.243	-108.298	-108.288	-108.224	-108.224	-108.224	-108.224		4.25	-0.0370071	-0.00118461	0.0346383	0.111073	0.111073	0.111073	0.111073	0.00426239	-0.000294802	-0.00468217	0.0632744	0.0632744	0.063299	0.063299	0.0539803	-0.000740708	0.00940171	0.0728143	0.0728143	0.0728444	0.0728444
	4.23	-108.243	-108.208	-108.172	-108.095	-108.095	-108.095	-108.095	-108.243	-108.248	-108.252	-108.184	-108.184	-108.184	-108.184	-108.243	-108.298	-108.288	-108.225	-108.225	-108.224	-108.224		4.24	-0.0370622	-0.00124453	0.0345736	0.111009	0.111009	0.111009	0.111009	0.00420732	-0.000310072	-0.00466465	0.0632221	0.0632221	0.0632488	0.0632488	0.0539252	-0.000778318	0.0093937	0.0727645	0.0727645	0.0727954	0.0727954
	4.22	-108.243	-108.208	-108.172	-108.095	-108.095	-108.095	-108.095	-108.243	-108.248	-108.252	-108.184	-108.184	-108.184	-108.184	-108.243	-108.298	-108.288	-108.225	-108.225	-108.225	-108.225		4.23	-0.0371183	-0.00130555	0.0345076	0.110944	0.110944	0.110945	0.110945	0.00415123	-0.000325587	-0.00464679	0.0631554	0.0631554	0.0632112	0.0632112	0.0538691	-0.000816677	0.00938564	0.0727123	0.0727123	0.0727467	0.0727467
	4.21	-108.243	-108.208	-108.172	-108.095	-108.095	-108.095	-108.095	-108.243	-108.248	-108.252	-108.184	-108.184	-108.184	-108.184	-108.243	-108.298	-108.288	-108.225	-108.225	-108.225	-108.225		4.22	-0.0371754	-0.00136769	0.0344405	0.110878	0.110878	0.110879	0.110879	0.00409411	-0.00034155	-0.0046286	0.0631174	0.0631174	0.0631429	0.0631429	0.053812	-0.000855647	0.00937718	0.072662	0.072662	0.0726943	0.0726943
	4.2	-108.244	-108.208	-108.172	-108.096	-108.096	-108.096	-108.096	-108.244	-108.248	-108.252	-108.185	-108.185	-108.184	-108.184	-108.244	-108.298	-108.288	-108.225	-108.225	-108.225	-108.225		4.21	-0.0372336	-0.00143096	0.0343721	0.110811	0.110811	0.110812	0.110812	0.00403595	-0.000357861	-0.00461023	0.0630631	0.0630631	0.063089	0.063089	0.0537538	-0.000895474	0.00936848	0.0726094	0.0726094	0.0726424	0.0726424
	4.19	-108.244	-108.208	-108.172	-108.096	-108.096	-108.096	-108.096	-108.244	-108.248	-108.252	-108.185	-108.185	-108.185	-108.185	-108.244	-108.298	-108.288	-108.225	-108.225	-108.225	-108.225		4.2	-0.0372928	-0.00149538	0.0343025	0.110743	0.110743	0.110743	0.110743	0.00397673	-0.000374475	-0.00459147	0.0630078	0.0630078	0.063034	0.063034	0.0536946	-0.000936021	0.00935966	0.0725557	0.0725557	0.0725895	0.0725895
	4.18	-108.244	-108.208	-108.172	-108.096	-108.096	-108.096	-108.096	-108.244	-108.248	-108.252	-108.185	-108.185	-108.185	-108.185	-108.244	-108.298	-108.288	-108.225	-108.225	-108.225	-108.225		4.19	-0.0373531	-0.00156097	0.0342317	0.110674	0.110674	0.110674	0.110674	0.00391644	-0.000391441	-0.0045724	0.0629515	0.0629515	0.0629782	0.0629782	0.0536343	-0.000977332	0.00935063	0.072501	0.072501	0.0725356	0.0725356
	4.17	-108.244	-108.208	-108.172	-108.096	-108.096	-108.096	-108.096	-108.244	-108.248	-108.252	-108.185	-108.185	-108.185	-108.185	-108.244	-108.298	-108.288	-108.225	-108.225	-108.225	-108.225		4.18	-0.0374145	-0.00162774	0.0341596	0.110603	0.110603	0.110603	0.110603	0.00385505	-0.000408733	-0.00455294	0.0628943	0.0628943	0.0629213	0.0629213	0.0535729	-0.00101939	0.00934146	0.0724452	0.0724452	0.0724806	0.0724806
	4.16	-108.244	-108.208	-108.172	-108.096	-108.096	-108.096	-108.096	-108.244	-108.248	-108.252	-108.185	-108.185	-108.185	-108.185	-108.244	-108.298	-108.288	-108.225	-108.225	-108.225	-108.225		4.17	-0.037477	-0.00169571	0.0340861	0.110531	0.110531	0.110531	0.110531	0.00379256	-0.000426469	-0.00453329	0.0628359	0.0628359	0.0628633	0.0628633	0.0535105	-0.00106231	0.0093319	0.0723884	0.0723885	0.0724247	0.0724247
	4.15	-108.244	-108.208	-108.172	-108.096	-108.096	-108.096	-108.096	-108.244	-108.248	-108.252	-108.185	-108.185	-108.185	-108.185	-108.244	-108.298	-108.288	-108.225	-108.225	-108.225	-108.225		4.16	-0.0375406	-0.0017649	0.0340114	0.110457	0.110457	0.110458	0.110458	0.00372894	-0.000444508	-0.00451319	0.0627761	0.0627761	0.0628049	0.0628049	0.0534468	-0.00110596	0.00932226	0.0723305	0.0723305	0.0723676	0.0723676
	4.14	-108.244	-108.208	-108.172	-108.096	-108.096	-108.096	-108.096	-108.244	-108.248	-108.252	-108.185	-108.185	-108.185	-108.185	-108.244	-108.298	-108.288	-108.225	-108.225	-108.225	-108.225		4.15	-0.0376054	-0.00183533	0.0339353	0.110383	0.110383	0.110383	0.110383	0.00366418	-0.000462945	-0.00449286	0.062707	0.062707	0.0627535	0.0627535	0.0533821	-0.00115052	0.00931235	0.0722708	0.0722708	0.0723101	0.0723101
	4.13	-108.244	-108.208	-108.172	-108.096	-108.096	-108.096	-108.096	-108.244	-108.248	-108.252	-108.185	-108.185	-108.185	-108.185	-108.244	-108.298	-108.288	-108.225	-108.225	-108.225	-108.225		4.14	-0.0376713	-0.00190702	0.0338579	0.110307	0.110307	0.110307	0.110307	0.00359826	-0.000481824	-0.00447213	0.0626547	0.0626547	0.0626832	0.0626832	0.0533162	-0.00119582	0.00930212	0.0722114	0.0722114	0.0722501	0.0722501
	4.12	-108.244	-108.208	-108.173	-108.096	-108.096	-108.096	-108.096	-108.244	-108.248	-108.252	-108.185	-108.185	-108.185	-108.185	-108.244	-108.299	-108.288	-108.225	-108.225	-108.225	-108.225		4.13	-0.0377384	-0.00197997	0.0337791	0.110229	0.110229	0.11023	0.11023	0.00353117	-0.000501099	-0.00445113	0.0625921	0.0625921	0.062621	0.062621	0.0532491	-0.00124203	0.00929163	0.0721503	0.0721503	0.0721898	0.0721898
	4.11	-108.244	-108.208	-108.173	-108.096	-108.096	-108.096	-108.096	-108.244	-108.248	-108.252	-108.185	-108.185	-108.185	-108.185	-108.244	-108.299	-108.288	-108.225	-108.225	-108.225	-108.225		4.12	-0.0378067	-0.00205422	0.033699	0.11015	0.11015	0.110151	0.110151	0.00346288	-0.000520778	-0.00442978	0.0625284	0.0625284	0.0625577	0.0625577	0.0531808	-0.0012891	0.00928091	0.0720879	0.0720879	0.0721283	0.0721283
	4.1	-108.244	-108.208	-108.173	-108.096	-108.096	-108.096	-108.096	-108.244	-108.248	-108.252	-108.185	-108.185	-108.185	-108.185	-108.244	-108.299	-108.288	-108.225	-108.225	-108.225	-108.225		4.11	-0.0378762	-0.00212978	0.0336174	0.11007	0.11007	0.110071	0.110071	0.00339338	-0.000540879	-0.00440809	0.0624636	0.0624636	0.0624932	0.0624932	0.0531113	-0.00133704	0.00926991	0.0720244	0.0720244	0.0720656	0.0720656
	4.09	-108.244	-108.209	-108.173	-108.096	-108.096	-108.096	-108.096	-108.244	-108.248	-108.252	-108.185	-108.185	-108.185	-108.185	-108.244	-108.299	-108.288	-108.225	-108.225	-108.225	-108.225		4.1	-0.0379469	-0.00220666	0.0335344	0.109989	0.109989	0.109989	0.109989	0.00332266	-0.000561413	-0.00438607	0.0623977	0.0623977	0.0624276	0.0624276	0.0530406	-0.00138589	0.00925863	0.0719597	0.0719597	0.0720018	0.0720018
	4.08	-108.244	-108.209	-108.173	-108.096	-108.096	-108.096	-108.096	-108.244	-108.248	-108.252	-108.185	-108.185	-108.185	-108.185	-108.244	-108.299	-108.288	-108.225	-108.225	-108.225	-108.225		4.09	-0.0380188	-0.00228489	0.0334499	0.109906	0.109906	0.109906	0.109906	0.00325069	-0.00058239	-0.00436371	0.0623305	0.0623305	0.0623608	0.0623608	0.0529686	-0.00143564	0.00924706	0.0718938	0.0718938	0.0719368	0.0719368
	4.07	-108.244	-108.209	-108.173	-108.097	-108.097	-108.097	-108.097	-108.244	-108.248	-108.252	-108.185	-108.185	-108.185	-108.185	-108.244	-108.299	-108.288	-108.225	-108.225	-108.225	-108.225		4.08	-0.0380921	-0.00236448	0.033364	0.109821	0.109821	0.109822	0.109822	0.00317745	-0.000603816	-0.004341	0.0622618	0.0622618	0.0622933	0.0622933	0.0528953	-0.00148633	0.0092352	0.0718267	0.0718267	0.0718706	0.0718706
	4.06	-108.245	-108.209	-108.173	-108.097	-108.097	-108.097	-108.097	-108.245	-108.248	-108.252	-108.185	-108.185	-108.185	-108.185	-108.245	-108.299	-108.288	-108.226	-108.226	-108.226	-108.226		4.07	-0.0381666	-0.00244546	0.0332766	0.109736	0.109736	0.109736	0.109736	0.00310294	-0.000625683	-0.00431797	0.0621858	0.0621858	0.0622306	0.0622306	0.0528208	-0.00153798	0.00922306	0.0717579	0.0717579	0.0718036	0.0718036
	4.05	-108.245	-108.209	-108.173	-108.097	-108.097	-108.097	-108.097	-108.245	-108.248	-108.252	-108.185	-108.185	-108.185	-108.185	-108.245	-108.299	-108.288	-108.226	-108.226	-108.226	-108.226		4.06	-0.0382424	-0.00252784	0.0331877	0.109648	0.109648	0.109649	0.109649	0.00302712	-0.00064806	-0.00429454	0.0621221	0.0621221	0.0621533	0.0621533	0.052745	-0.00159053	0.00921057	0.0716887	0.0716887	0.0717343	0.0717343
	4.04	-108.245	-108.209	-108.173	-108.097	-108.097	-108.097	-108.097	-108.245	-108.248	-108.252	-108.186	-108.186	-108.186	-108.186	-108.245	-108.299	-108.288	-108.226	-108.226	-108.226	-108.226		4.05	-0.0383196	-0.00261164	0.0330973	0.109559	0.109559	0.10956	0.10956	0.00294999	-0.000670914	-0.00427081	0.0620501	0.0620501	0.0620817	0.0620817	0.0526679	-0.0016441	0.00919774	0.0716179	0.0716179	0.0716643	0.0716643
	4.03	-108.245	-108.209	-108.173	-108.097	-108.097	-108.097	-108.097	-108.245	-108.248	-108.252	-108.186	-108.186	-108.186	-108.186	-108.245	-108.299	-108.288	-108.226	-108.226	-108.226	-108.226		4.04	-0.038398	-0.00269688	0.0330054	0.109469	0.109469	0.10947	0.10947	0.00287151	-0.000694252	-0.00424671	0.0619769	0.0619769	0.0620088	0.0620088	0.0525894	-0.00169866	0.0091846	0.0715457	0.0715457	0.071593	0.071593
	4.02	-108.245	-108.209	-108.173	-108.097	-108.097	-108.097	-108.097	-108.245	-108.248	-108.252	-108.186	-108.186	-108.186	-108.186	-108.245	-108.299	-108.288	-108.226	-108.226	-108.226	-108.226		4.03	-0.0384779	-0.00278359	0.0329118	0.109377	0.109377	0.109378	0.109378	0.00279168	-0.000718094	-0.00422226	0.0619024	0.0619024	0.0619346	0.0619346	0.0525096	-0.00175423	0.00917112	0.0714722	0.0714722	0.0715204	0.0715204
	4.01	-108.245	-108.209	-108.174	-108.097	-108.097	-108.097	-108.097	-108.245	-108.248	-108.252	-108.186	-108.186	-108.186	-108.186	-108.245	-108.299	-108.288	-108.226	-108.226	-108.226	-108.226		4.02	-0.0385591	-0.00287178	0.0328167	0.109284	0.109284	0.109284	0.109284	0.00271047	-0.000742453	-0.00419745	0.0618267	0.0618267	0.0618591	0.0618591	0.0524284	-0.00181082	0.00915729	0.0713973	0.0713973	0.0714464	0.0714464
	4	-108.245	-108.209	-108.174	-108.097	-108.097	-108.097	-108.097	-108.245	-108.248	-108.252	-108.186	-108.186	-108.186	-108.186	-108.245	-108.299	-108.288	-108.226	-108.226	-108.226	-108.226		4.01	-0.0386417	-0.00296146	0.03272	0.109189	0.109189	0.109189	0.109189	0.00262786	-0.000767337	-0.00417229	0.0617496	0.0617496	0.0617824	0.0617824	0.0523458	-0.00186847	0.0091431	0.071321	0.0713211	0.0713711	0.0713711
	3.99	-108.245	-108.209	-108.174	-108.097	-108.097	-108.097	-108.097	-108.245	-108.248	-108.252	-108.186	-108.186	-108.186	-108.186	-108.245	-108.299	-108.288	-108.226	-108.226	-108.226	-108.226		4	-0.0387257	-0.00305268	0.0326217	0.109092	0.109092	0.109093	0.109093	0.00254384	-0.000792761	-0.00414677	0.0616712	0.0616712	0.0617042	0.0617042	0.0522617	-0.00192717	0.00912853	0.0712434	0.0712434	0.0712944	0.0712944
	3.98	-108.245	-108.209	-108.174	-108.097	-108.097	-108.097	-108.097	-108.245	-108.248	-108.252	-108.186	-108.186	-108.186	-108.186	-108.245	-108.299	-108.288	-108.226	-108.226	-108.226	-108.226		3.99	-0.0388112	-0.00314543	0.0325217	0.108994	0.108994	0.108995	0.108995	0.00245838	-0.000818735	-0.00412088	0.0615914	0.0615914	0.0616248	0.0616248	0.0521763	-0.00198696	0.00911358	0.0711644	0.0711644	0.0712162	0.0712162
	3.97	-108.245	-108.21	-108.174	-108.097	-108.097	-108.097	-108.097	-108.245	-108.248	-108.252	-108.186	-108.186	-108.186	-108.186	-108.245	-108.299	-108.288	-108.226	-108.226	-108.226	-108.226		3.98	-0.0388981	-0.00323975	0.0324201	0.108894	0.108894	0.108895	0.108895	0.00237146	-0.000845267	-0.00409464	0.0615091	0.0615091	0.0615451	0.0615451	0.0520894	-0.00204786	0.00909824	0.0710838	0.0710838	0.0711367	0.0711367
	3.96	-108.245	-108.21	-108.174	-108.098	-108.098	-108.098	-108.098	-108.245	-108.248	-108.252	-108.186	-108.186	-108.186	-108.186	-108.245	-108.299	-108.288	-108.226	-108.226	-108.226	-108.226		3.97	-0.0389865	-0.00333565	0.0323167	0.108792	0.108792	0.108793	0.108793	0.00228306	-0.000872298	-0.00406809	0.0614117	0.0614117	0.0614777	0.0614777	0.052001	-0.00210994	0.00908259	0.0710007	0.0710007	0.0710569	0.0710569
	3.95	-108.245	-108.21	-108.174	-108.098	-108.098	-108.098	-108.098	-108.245	-108.248	-108.252	-108.186	-108.186	-108.186	-108.186	-108.245	-108.299	-108.288	-108.226	-108.226	-108.226	-108.226		3.96	-0.0390764	-0.00343315	0.0322117	0.108689	0.108689	0.10869	0.10869	0.00219317	-0.000900075	-0.00404103	0.061344	0.061344	0.0613779	0.0613779	0.0519111	-0.00217299	0.00906636	0.0709185	0.0709185	0.070973	0.0709731
	3.94	-108.246	-108.21	-108.174	-108.098	-108.098	-108.098	-108.098	-108.246	-108.248	-108.252	-108.186	-108.186	-108.186	-108.186	-108.246	-108.3	-108.288	-108.226	-108.226	-108.226	-108.226		3.95	-0.0391678	-0.00353228	0.0321049	0.108584	0.108584	0.108585	0.108585	0.00210175	-0.000928384	-0.00401369	0.0612586	0.0612586	0.0612927	0.0612927	0.0518196	-0.00223732	0.00904974	0.0708336	0.0708336	0.070889	0.070889
	3.93	-108.246	-108.21	-108.174	-108.098	-108.098	-108.098	-108.098	-108.246	-108.249	-108.251	-108.186	-108.186	-108.186	-108.186	-108.246	-108.3	-108.288	-108.227	-108.227	-108.227	-108.227		3.94	-0.0392607	-0.00363306	0.0319964	0.108477	0.108477	0.108478	0.108478	0.0020088	-0.000957298	-0.00398597	0.0611718	0.0611718	0.0612061	0.0612061	0.0517267	-0.00230281	0.0090327	0.0707472	0.0707472	0.0708035	0.0708035
	3.92	-108.246	-108.21	-108.174	-108.098	-108.098	-108.098	-108.098	-108.246	-108.249	-108.251	-108.187	-108.187	-108.186	-108.186	-108.246	-108.3	-108.288	-108.227	-108.227	-108.227	-108.227		3.93	-0.0393553	-0.00373551	0.0318861	0.108369	0.108369	0.10837	0.10837	0.00191428	-0.000986839	-0.00395788	0.0610836	0.0610836	0.061118	0.061118	0.0516322	-0.0023695	0.00901522	0.0706592	0.0706592	0.0707163	0.0707163
	3.91	-108.246	-108.21	-108.175	-108.098	-108.098	-108.098	-108.098	-108.246	-108.249	-108.251	-108.187	-108.187	-108.187	-108.187	-108.246	-108.3	-108.288	-108.227	-108.227	-108.227	-108.227		3.92	-0.0394514	-0.00383965	0.031774	0.108259	0.108259	0.10826	0.10826	0.00181817	-0.00101702	-0.00392942	0.0609938	0.0609938	0.0610284	0.0610284	0.0515361	-0.0024374	0.00899727	0.0705696	0.0705696	0.0706276	0.0706276
	3.9	-108.246	-108.21	-108.175	-108.098	-108.098	-108.098	-108.098	-108.246	-108.249	-108.251	-108.187	-108.187	-108.187	-108.187	-108.246	-108.3	-108.288	-108.227	-108.227	-108.227	-108.227		3.91	-0.0395491	-0.00394551	0.0316601	0.108147	0.108147	0.108148	0.108148	0.00172047	-0.00104786	-0.00390058	0.0609025	0.0609025	0.0609372	0.0609372	0.0514384	-0.00250655	0.00897884	0.0704784	0.0704784	0.0705373	0.0705373
	3.89	-108.246	-108.21	-108.175	-108.098	-108.098	-108.098	-108.098	-108.246	-108.249	-108.251	-108.187	-108.187	-108.187	-108.187	-108.246	-108.3	-108.288	-108.227	-108.227	-108.227	-108.227		3.9	-0.0396484	-0.00405309	0.0315444	0.108033	0.108033	0.108034	0.108034	0.00162113	-0.00107936	-0.00387137	0.0608092	0.0608092	0.0608449	0.0608449	0.051339	-0.00257696	0.00895992	0.0703856	0.0703856	0.0704453	0.0704453
	3.88	-108.246	-108.211	-108.175	-108.098	-108.098	-108.098	-108.098	-108.246	-108.249	-108.251	-108.187	-108.187	-108.187	-108.187	-108.246	-108.3	-108.288	-108.227	-108.227	-108.227	-108.227		3.89	-0.0397494	-0.00416244	0.0314268	0.107917	0.107917	0.107919	0.107919	0.00152014	-0.00111152	-0.0038418	0.0607087	0.0607087	0.0607568	0.0607568	0.051238	-0.00264868	0.00894052	0.0702907	0.0702907	0.0703521	0.0703521
	3.87	-108.246	-108.211	-108.175	-108.099	-108.099	-108.099	-108.099	-108.246	-108.249	-108.251	-108.187	-108.187	-108.187	-108.187	-108.246	-108.3	-108.288	-108.227	-108.227	-108.227	-108.227		3.88	-0.0398521	-0.00427356	0.0313073	0.1078	0.1078	0.107801	0.107801	0.00141748	-0.00114444	-0.0038118	0.0606194	0.0606194	0.0606542	0.0606542	0.0511354	-0.00272162	0.00892059	0.070195	0.070195	0.0702563	0.0702563
	3.86	-108.246	-108.211	-108.175	-108.099	-108.099	-108.099	-108.099	-108.246	-108.249	-108.251	-108.187	-108.187	-108.187	-108.187	-108.246	-108.3	-108.288	-108.227	-108.227	-108.227	-108.227		3.87	-0.0399564	-0.00438649	0.0311859	0.10768	0.10768	0.107682	0.107682	0.00131312	-0.00117805	-0.00378145	0.0605218	0.0605218	0.0605567	0.0605567	0.051031	-0.00279597	0.00890007	0.0700971	0.0700971	0.0701593	0.0701593
	3.85	-108.246	-108.211	-108.175	-108.099	-108.099	-108.099	-108.099	-108.246	-108.249	-108.251	-108.187	-108.187	-108.187	-108.187	-108.246	-108.3	-108.288	-108.227	-108.227	-108.227	-108.227		3.86	-0.0400625	-0.00450124	0.0310626	0.107559	0.107559	0.107561	0.107561	0.00120704	-0.00121238	-0.00375072	0.0604227	0.0604227	0.0604574	0.0604574	0.0509249	-0.00287165	0.00887904	0.0699976	0.0699976	0.0700605	0.0700605
	3.84	-108.247	-108.211	-108.175	-108.099	-108.099	-108.099	-108.099	-108.247	-108.249	-108.251	-108.187	-108.187	-108.187	-108.187	-108.247	-108.3	-108.288	-108.227	-108.227	-108.227	-108.227		3.85	-0.0401703	-0.00461784	0.0309374	0.107436	0.107436	0.107437	0.107437	0.00109922	-0.00124746	-0.00371961	0.0603218	0.0603218	0.0603565	0.0603565	0.0508171	-0.0029487	0.00885745	0.0698962	0.0698962	0.0699599	0.0699599
	3.83	-108.247	-108.211	-108.176	-108.099	-108.099	-108.099	-108.099	-108.247	-108.249	-108.251	-108.187	-108.187	-108.187	-108.187	-108.247	-108.3	-108.288	-108.228	-108.228	-108.227	-108.227		3.84	-0.0402799	-0.00473631	0.0308102	0.107311	0.107311	0.107312	0.107312	0.000989637	-0.0012833	-0.00368812	0.0602193	0.0602193	0.0602539	0.0602539	0.0507075	-0.00302714	0.00883528	0.0697931	0.0697931	0.0698575	0.0698575
	3.82	-108.247	-108.211	-108.176	-108.099	-108.099	-108.099	-108.099	-108.247	-108.249	-108.251	-108.188	-108.188	-108.187	-108.187	-108.247	-108.3	-108.288	-108.228	-108.228	-108.228	-108.228		3.83	-0.0403913	-0.00485667	0.030681	0.107183	0.107183	0.107185	0.107185	0.000878261	-0.00131992	-0.00365625	0.0601151	0.0601151	0.0601496	0.0601496	0.0505962	-0.00310701	0.00881252	0.0696881	0.0696881	0.0697533	0.0697533
	3.81	-108.247	-108.211	-108.176	-108.099	-108.099	-108.099	-108.099	-108.247	-108.249	-108.251	-108.188	-108.188	-108.188	-108.188	-108.247	-108.301	-108.288	-108.228	-108.228	-108.228	-108.228		3.82	-0.0405045	-0.00497895	0.0305497	0.107054	0.107054	0.107056	0.107056	0.00076507	-0.00135733	-0.00362399	0.0600092	0.0600092	0.0600435	0.0600435	0.050483	-0.00318832	0.00878914	0.0695813	0.0695813	0.0696472	0.0696472
	3.8	-108.247	-108.211	-108.176	-108.099	-108.099	-108.099	-108.099	-108.247	-108.249	-108.251	-108.188	-108.188	-108.188	-108.188	-108.247	-108.301	-108.289	-108.228	-108.228	-108.228	-108.228		3.81	-0.0406195	-0.00510318	0.0304165	0.106923	0.106923	0.106925	0.106925	0.00065004	-0.00139555	-0.00359136	0.0599013	0.0599013	0.0599359	0.0599359	0.0503679	-0.0032711	0.00876514	0.0694726	0.0694726	0.0695392	0.0695392
	3.79	-108.247	-108.212	-108.176	-108.1	-108.1	-108.1	-108.1	-108.247	-108.249	-108.251	-108.188	-108.188	-108.188	-108.188	-108.247	-108.301	-108.289	-108.228	-108.228	-108.228	-108.228		3.8	-0.0407364	-0.00522936	0.0302812	0.10679	0.10679	0.106792	0.106792	0.000533147	-0.00143459	-0.00355835	0.0597887	0.0597887	0.0598293	0.0598293	0.050251	-0.00335538	0.0087405	0.0693619	0.0693619	0.0694294	0.0694294
	3.78	-108.247	-108.212	-108.176	-108.1	-108.1	-108.1	-108.1	-108.247	-108.249	-108.251	-108.188	-108.188	-108.188	-108.188	-108.247	-108.301	-108.289	-108.228	-108.228	-108.228	-108.228		3.79	-0.0408552	-0.00535753	0.0301438	0.106655	0.106655	0.106657	0.106657	0.000414367	-0.00147451	-0.00352494	0.0596808	0.0596808	0.0597144	0.0597144	0.0501323	-0.00344112	0.00871524	0.0692495	0.0692495	0.0693173	0.0693173
	3.77	-108.247	-108.212	-108.176	-108.1	-108.1	-108.1	-108.1	-108.247	-108.249	-108.251	-108.188	-108.188	-108.188	-108.188	-108.247	-108.301	-108.289	-108.228	-108.228	-108.228	-108.228		3.78	-0.0409759	-0.00548772	0.0300043	0.106517	0.106517	0.10652	0.10652	0.000293675	-0.00151527	-0.00349114	0.0595678	0.0595678	0.059601	0.059601	0.0500116	-0.00352849	0.00868919	0.0691351	0.0691351	0.0692034	0.0692034
	3.76	-108.247	-108.212	-108.177	-108.1	-108.1	-108.1	-108.1	-108.247	-108.249	-108.251	-108.188	-108.188	-108.188	-108.188	-108.247	-108.301	-108.289	-108.228	-108.228	-108.228	-108.228		3.77	-0.0410985	-0.00561994	0.0298627	0.106378	0.106378	0.106381	0.106381	0.000171045	-0.00155692	-0.00345697	0.0594529	0.0594529	0.0594856	0.0594856	0.0498889	-0.00361739	0.0086625	0.0690186	0.0690186	0.0690875	0.0690875
	3.75	-108.248	-108.212	-108.177	-108.1	-108.1	-108.1	-108.1	-108.248	-108.249	-108.251	-108.188	-108.188	-108.188	-108.188	-108.248	-108.301	-108.289	-108.228	-108.228	-108.228	-108.228		3.76	-0.0412231	-0.00575422	0.0297189	0.106237	0.106237	0.106239	0.106239	4.64519e-05	-0.00159947	-0.00342242	0.0593361	0.0593361	0.0593684	0.0593684	0.0497643	-0.00370789	0.00863509	0.0689001	0.0689001	0.0689695	0.0689695
	3.74	-108.248	-108.212	-108.177	-108.1	-108.1	-108.1	-108.1	-108.248	-108.249	-108.251	-108.188	-108.188	-108.188	-108.188	-108.248	-108.301	-108.289	-108.229	-108.229	-108.229	-108.229		3.75	-0.0413497	-0.00589058	0.0295729	0.106093	0.106093	0.106096	0.106096	-8.01298e-05	-0.00164294	-0.00338748	0.0592174	0.0592174	0.0592492	0.0592492	0.0496378	-0.00380002	0.00860695	0.0687796	0.0687796	0.0688494	0.0688494
	3.73	-108.248	-108.212	-108.177	-108.1	-108.1	-108.1	-108.1	-108.248	-108.249	-108.251	-108.189	-108.189	-108.189	-108.189	-108.248	-108.301	-108.289	-108.229	-108.229	-108.229	-108.229		3.74	-0.0414783	-0.00602905	0.0294248	0.105947	0.105947	0.10595	0.10595	-0.000208726	-0.00168736	-0.00335217	0.0590968	0.0590968	0.0591281	0.0591281	0.0495092	-0.00389379	0.00857805	0.0686569	0.0686569	0.0687272	0.0687272
	3.72	-108.248	-108.213	-108.177	-108.101	-108.101	-108.101	-108.101	-108.248	-108.249	-108.251	-108.189	-108.189	-108.189	-108.189	-108.248	-108.301	-108.289	-108.229	-108.229	-108.229	-108.229		3.73	-0.0416089	-0.00616966	0.0292745	0.105799	0.105799	0.105802	0.105802	-0.000339362	-0.00173273	-0.00331648	0.0589742	0.0589742	0.0590049	0.0590049	0.0493785	-0.00398924	0.00854837	0.0685322	0.0685322	0.0686028	0.0686028
	3.71	-108.248	-108.213	-108.177	-108.101	-108.101	-108.101	-108.101	-108.248	-108.249	-108.251	-108.189	-108.189	-108.189	-108.189	-108.248	-108.301	-108.289	-108.229	-108.229	-108.229	-108.229		3.72	-0.0417416	-0.00631242	0.0291219	0.105649	0.105649	0.105652	0.105652	-0.000472064	-0.00177908	-0.00328041	0.0588494	0.0588494	0.05888	0.05888	0.0492458	-0.0040864	0.0085179	0.0684053	0.0684053	0.0684763	0.0684763
	3.7	-108.248	-108.213	-108.177	-108.101	-108.101	-108.101	-108.101	-108.248	-108.249	-108.251	-108.189	-108.189	-108.189	-108.189	-108.248	-108.302	-108.289	-108.229	-108.229	-108.229	-108.229		3.71	-0.0418764	-0.00645736	0.028967	0.105496	0.105496	0.1055	0.1055	-0.00060686	-0.00182641	-0.00324399	0.0587198	0.0587198	0.0587558	0.0587558	0.049111	-0.0041853	0.00848661	0.0682761	0.0682761	0.0683476	0.0683476
	3.69	-108.248	-108.213	-108.178	-108.101	-108.101	-108.101	-108.101	-108.248	-108.249	-108.251	-108.189	-108.189	-108.189	-108.189	-108.248	-108.302	-108.289	-108.229	-108.229	-108.229	-108.229		3.7	-0.0420133	-0.0066045	0.0288099	0.105341	0.105341	0.105345	0.105345	-0.000743774	-0.00187482	-0.00320718	0.0585946	0.0585946	0.058623	0.058623	0.0489741	-0.00428589	0.00845454	0.0681449	0.0681449	0.0682163	0.0682163
	3.68	-108.249	-108.213	-108.178	-108.101	-108.101	-108.101	-108.101	-108.249	-108.25	-108.251	-108.189	-108.189	-108.189	-108.189	-108.249	-108.302	-108.289	-108.229	-108.229	-108.229	-108.229		3.69	-0.0421524	-0.00675388	0.0286505	0.105184	0.105184	0.105188	0.105188	-0.000882833	-0.00192424	-0.00316996	0.058464	0.058464	0.0584916	0.0584916	0.0488351	-0.00438838	0.00842147	0.0680114	0.0680114	0.068083	0.068083
	3.67	-108.249	-108.213	-108.178	-108.101	-108.101	-108.101	-108.101	-108.249	-108.25	-108.251	-108.189	-108.189	-108.189	-108.189	-108.249	-108.302	-108.289	-108.23	-108.23	-108.229	-108.229		3.68	-0.0422936	-0.00690551	0.0284887	0.105025	0.105025	0.105029	0.105029	-0.00102407	-0.00197473	-0.00313239	0.0583313	0.0583313	0.0583579	0.0583579	0.0486938	-0.00449265	0.00838759	0.0678756	0.0678756	0.0679473	0.0679473
	3.66	-108.249	-108.213	-108.178	-108.102	-108.102	-108.102	-108.102	-108.249	-108.25	-108.251	-108.189	-108.189	-108.189	-108.189	-108.249	-108.302	-108.289	-108.23	-108.23	-108.23	-108.23		3.67	-0.042437	-0.00705942	0.0283246	0.104863	0.104863	0.104867	0.104867	-0.0011675	-0.00202631	-0.00309446	0.0581965	0.0581965	0.058222	0.058222	0.0485504	-0.00459876	0.0083528	0.0677375	0.0677375	0.0678092	0.0678092
	3.65	-108.249	-108.214	-108.178	-108.102	-108.102	-108.102	-108.102	-108.249	-108.25	-108.251	-108.19	-108.19	-108.19	-108.19	-108.249	-108.302	-108.289	-108.23	-108.23	-108.23	-108.23		3.66	-0.0425827	-0.00721564	0.0281582	0.104699	0.104699	0.104704	0.104704	-0.00131316	-0.002079	-0.00305617	0.0580595	0.0580595	0.058084	0.058084	0.0484047	-0.00470676	0.00831707	0.067597	0.067597	0.0676687	0.0676687
	3.64	-108.249	-108.214	-108.178	-108.102	-108.102	-108.102	-108.102	-108.249	-108.25	-108.251	-108.19	-108.19	-108.19	-108.19	-108.249	-108.302	-108.289	-108.23	-108.23	-108.23	-108.23		3.65	-0.0427306	-0.00737418	0.0279893	0.104533	0.104533	0.104537	0.104537	-0.00146107	-0.00213281	-0.0030175	0.0579204	0.0579204	0.0579436	0.0579436	0.0482568	-0.00481666	0.00828039	0.0674541	0.0674541	0.0675257	0.0675257
	3.63	-108.249	-108.214	-108.179	-108.102	-108.102	-108.102	-108.102	-108.249	-108.25	-108.25	-108.19	-108.19	-108.19	-108.19	-108.249	-108.302	-108.289	-108.23	-108.23	-108.23	-108.23		3.64	-0.0428808	-0.00753508	0.0278181	0.104364	0.104364	0.104369	0.104369	-0.00161127	-0.00218779	-0.00297849	0.0577791	0.0577791	0.057801	0.057801	0.0481066	-0.00492851	0.00824273	0.0673088	0.0673088	0.0673802	0.0673802
	3.62	-108.249	-108.214	-108.179	-108.102	-108.102	-108.102	-108.102	-108.249	-108.25	-108.25	-108.19	-108.19	-108.19	-108.19	-108.249	-108.302	-108.289	-108.23	-108.23	-108.23	-108.23		3.63	-0.0430333	-0.00769836	0.0276444	0.104193	0.104193	0.104198	0.104198	-0.00176377	-0.00224395	-0.00293912	0.0576353	0.0576353	0.0576563	0.0576563	0.0479541	-0.00504234	0.00820406	0.0671611	0.0671611	0.0672322	0.0672322
	3.61	-108.25	-108.214	-108.179	-108.102	-108.102	-108.102	-108.102	-108.25	-108.25	-108.25	-108.19	-108.19	-108.19	-108.19	-108.25	-108.303	-108.289	-108.23	-108.23	-108.23	-108.23		3.62	-0.0431881	-0.00786403	0.0274682	0.104019	0.104019	0.104024	0.104024	-0.00191861	-0.00230129	-0.00289943	0.0574874	0.0574874	0.0575111	0.0575111	0.0477993	-0.00515817	0.00816437	0.0670108	0.0670108	0.0670817	0.0670817
	3.6	-108.25	-108.214	-108.179	-108.103	-108.103	-108.103	-108.103	-108.25	-108.25	-108.25	-108.19	-108.19	-108.19	-108.19	-108.25	-108.303	-108.289	-108.231	-108.231	-108.23	-108.23		3.61	-0.0433454	-0.00803214	0.0272896	0.103843	0.103843	0.103849	0.103849	-0.00207582	-0.00235992	-0.00285939	0.0573416	0.0573416	0.057359	0.057359	0.0476421	-0.00527596	0.00812368	0.0668581	0.0668581	0.0669284	0.0669284
	3.59	-108.25	-108.215	-108.179	-108.103	-108.103	-108.103	-108.103	-108.25	-108.25	-108.25	-108.19	-108.19	-108.19	-108.19	-108.25	-108.303	-108.289	-108.231	-108.231	-108.231	-108.231		3.6	-0.043505	-0.0082027	0.0271085	0.103665	0.103665	0.10367	0.10367	-0.00223541	-0.00241976	-0.00281894	0.0571912	0.0571912	0.057207	0.057207	0.0474825	-0.00539597	0.00808175	0.0667029	0.0667029	0.0667726	0.0667726
	3.58	-108.25	-108.215	-108.18	-108.103	-108.103	-108.103	-108.103	-108.25	-108.25	-108.25	-108.191	-108.191	-108.191	-108.191	-108.25	-108.303	-108.289	-108.231	-108.231	-108.231	-108.231		3.59	-0.043667	-0.00837573	0.0269248	0.103484	0.103484	0.10349	0.10349	-0.00239743	-0.00248088	-0.00277819	0.0570385	0.0570385	0.0570524	0.0570524	0.0473205	-0.00551802	0.00803878	0.066545	0.066545	0.0666141	0.0666141
	3.57	-108.25	-108.215	-108.18	-108.103	-108.103	-108.103	-108.103	-108.25	-108.25	-108.25	-108.191	-108.191	-108.191	-108.191	-108.25	-108.303	-108.289	-108.231	-108.231	-108.231	-108.231		3.58	-0.0438314	-0.00855127	0.0267387	0.1033	0.1033	0.103306	0.103306	-0.0025619	-0.00254332	-0.00273712	0.0568834	0.0568834	0.0568954	0.0568954	0.047156	-0.0056422	0.00799467	0.0663844	0.0663845	0.0664528	0.0664528
	3.56	-108.25	-108.215	-108.18	-108.103	-108.103	-108.103	-108.103	-108.25	-108.25	-108.25	-108.191	-108.191	-108.191	-108.191	-108.25	-108.303	-108.289	-108.231	-108.231	-108.231	-108.231		3.57	-0.0439984	-0.00872933	0.02655	0.103114	0.103114	0.103121	0.103121	-0.00272884	-0.00260709	-0.00269573	0.0567258	0.0567258	0.0567358	0.0567358	0.0469891	-0.00576855	0.00794939	0.0662212	0.0662213	0.0662887	0.0662887
	3.55	-108.251	-108.215	-108.18	-108.104	-108.104	-108.104	-108.104	-108.251	-108.25	-108.25	-108.191	-108.191	-108.191	-108.191	-108.251	-108.303	-108.289	-108.231	-108.231	-108.231	-108.231		3.56	-0.0441678	-0.00890994	0.0263587	0.102925	0.102925	0.102932	0.102932	-0.00289829	-0.00267221	-0.00265402	0.0565659	0.0565659	0.0565737	0.0565737	0.0468196	-0.00589711	0.00790291	0.0660553	0.0660553	0.0661218	0.0661218
	3.54	-108.251	-108.216	-108.18	-108.104	-108.104	-108.104	-108.104	-108.251	-108.25	-108.25	-108.191	-108.191	-108.191	-108.191	-108.251	-108.303	-108.289	-108.232	-108.232	-108.231	-108.231		3.55	-0.0443398	-0.00909313	0.0261648	0.102734	0.102734	0.102741	0.102741	-0.00307028	-0.00273872	-0.002612	0.0564034	0.0564034	0.056409	0.056409	0.0466476	-0.00602791	0.00785519	0.0658867	0.0658867	0.0659521	0.0659521
	3.53	-108.251	-108.216	-108.18	-108.104	-108.104	-108.104	-108.104	-108.251	-108.25	-108.25	-108.191	-108.191	-108.191	-108.191	-108.251	-108.304	-108.289	-108.232	-108.232	-108.232	-108.232		3.54	-0.0445144	-0.00927891	0.0259683	0.10254	0.10254	0.102548	0.102548	-0.00324482	-0.00280664	-0.00256968	0.0562381	0.0562381	0.0562421	0.0562421	0.0464731	-0.00616099	0.00780621	0.0657153	0.0657153	0.0657794	0.0657794
	3.52	-108.251	-108.216	-108.181	-108.104	-108.104	-108.104	-108.104	-108.251	-108.25	-108.25	-108.192	-108.192	-108.192	-108.192	-108.251	-108.304	-108.29	-108.232	-108.232	-108.232	-108.232		3.53	-0.0446915	-0.00946732	0.0257692	0.102344	0.102344	0.102352	0.102352	-0.00342196	-0.00287604	-0.00252708	0.0560662	0.0560662	0.0560765	0.0560765	0.0462959	-0.00629631	0.007756	0.0655409	0.0655409	0.0656038	0.0656038
	3.51	-108.251	-108.216	-108.181	-108.104	-108.104	-108.104	-108.104	-108.251	-108.251	-108.25	-108.192	-108.192	-108.192	-108.192	-108.251	-108.304	-108.29	-108.232	-108.232	-108.232	-108.232		3.52	-0.0448712	-0.00965837	0.0255674	0.102145	0.102145	0.102153	0.102153	-0.00360171	-0.00294724	-0.00248381	0.0558777	0.0558777	0.0559222	0.0559222	0.0461162	-0.00643407	0.00770443	0.065363	0.065363	0.065426	0.065426
	3.5	-108.251	-108.216	-108.181	-108.105	-108.105	-108.105	-108.105	-108.251	-108.251	-108.25	-108.192	-108.192	-108.192	-108.192	-108.251	-108.304	-108.29	-108.232	-108.232	-108.232	-108.232		3.51	-0.0450537	-0.00985209	0.025363	0.101943	0.101943	0.101952	0.101952	-0.00378411	-0.0030192	-0.00244108	0.0557234	0.0557234	0.0557284	0.0557284	0.0459338	-0.00657409	0.00765146	0.0651838	0.0651838	0.0652435	0.0652435
	3.49	-108.252	-108.217	-108.181	-108.105	-108.105	-108.105	-108.105	-108.252	-108.251	-108.25	-108.192	-108.192	-108.192	-108.192	-108.252	-108.304	-108.29	-108.232	-108.232	-108.232	-108.232		3.5	-0.0452387	-0.0100485	0.0251558	0.101739	0.101739	0.101748	0.101748	-0.00396919	-0.00309305	-0.00239759	0.0555452	0.0555452	0.0555533	0.0555533	0.0457487	-0.00671667	0.00759706	0.0650009	0.0650009	0.0650588	0.0650588
	3.48	-108.252	-108.217	-108.182	-108.105	-108.105	-108.105	-108.105	-108.252	-108.251	-108.25	-108.192	-108.192	-108.192	-108.192	-108.252	-108.304	-108.29	-108.233	-108.233	-108.233	-108.233		3.49	-0.0454265	-0.0102476	0.024946	0.101532	0.101532	0.101541	0.101541	-0.00415697	-0.00316847	-0.00235389	0.0553642	0.0553642	0.0553754	0.0553754	0.0455609	-0.00686165	0.00754127	0.0648149	0.0648149	0.0648709	0.0648709
	3.47	-108.252	-108.217	-108.182	-108.105	-108.105	-108.105	-108.105	-108.252	-108.251	-108.25	-108.193	-108.193	-108.193	-108.193	-108.252	-108.304	-108.29	-108.233	-108.233	-108.233	-108.233		3.48	-0.045617	-0.0104495	0.0247335	0.101322	0.101322	0.101332	0.101332	-0.00434748	-0.00324547	-0.00230995	0.0551803	0.0551803	0.0551949	0.0551949	0.0453704	-0.00700913	0.00748402	0.064626	0.064626	0.0646798	0.0646799
	3.46	-108.252	-108.217	-108.182	-108.105	-108.105	-108.105	-108.105	-108.252	-108.251	-108.25	-108.193	-108.193	-108.193	-108.193	-108.252	-108.305	-108.29	-108.233	-108.233	-108.233	-108.233		3.47	-0.0458103	-0.0106541	0.0245182	0.101109	0.101109	0.10112	0.10112	-0.00454075	-0.0033241	-0.00226577	0.0549935	0.0549935	0.0550117	0.0550117	0.0451771	-0.00715913	0.00742526	0.064434	0.064434	0.0644856	0.0644856
	3.45	-108.252	-108.217	-108.182	-108.106	-108.106	-108.106	-108.106	-108.252	-108.251	-108.25	-108.193	-108.193	-108.193	-108.193	-108.252	-108.305	-108.29	-108.233	-108.233	-108.233	-108.233		3.46	-0.0460063	-0.0108616	0.0243002	0.100894	0.100894	0.100905	0.100905	-0.00473681	-0.00340437	-0.00222138	0.0548037	0.0548037	0.0548258	0.0548258	0.0449811	-0.00731171	0.00736497	0.0642389	0.0642389	0.064288	0.064288
	3.44	-108.253	-108.218	-108.182	-108.106	-108.106	-108.106	-108.106	-108.253	-108.251	-108.25	-108.193	-108.193	-108.193	-108.193	-108.253	-108.305	-108.29	-108.233	-108.233	-108.233	-108.233		3.45	-0.0462052	-0.0110718	0.0240794	0.100676	0.100676	0.100687	0.100687	-0.00493569	-0.00348633	-0.00217676	0.0546098	0.0546098	0.0546383	0.0546383	0.0447822	-0.00746689	0.00730311	0.0640406	0.0640406	0.0640872	0.0640872
	3.43	-108.253	-108.218	-108.183	-108.106	-108.106	-108.106	-108.106	-108.253	-108.251	-108.25	-108.193	-108.193	-108.193	-108.193	-108.253	-108.305	-108.29	-108.234	-108.234	-108.234	-108.234		3.44	-0.0464069	-0.0112848	0.0238559	0.100455	0.100455	0.100467	0.100467	-0.00513741	-0.00357013	-0.00213182	0.0544023	0.0544023	0.0544585	0.0544585	0.0445805	-0.00762475	0.00723967	0.0638378	0.0638378	0.0638843	0.0638843
	3.42	-108.253	-108.218	-108.183	-108.106	-108.106	-108.106	-108.106	-108.253	-108.251	-108.25	-108.194	-108.194	-108.193	-108.193	-108.253	-108.305	-108.29	-108.234	-108.234	-108.234	-108.234		3.43	-0.0466115	-0.0115007	0.0236296	0.100232	0.100232	0.100244	0.100244	-0.005342	-0.00365541	-0.00208705	0.0542167	0.0542167	0.0542509	0.0542509	0.0443759	-0.00778515	0.00717455	0.0636346	0.0636346	0.0636752	0.0636752
	3.41	-108.253	-108.218	-108.183	-108.106	-108.106	-108.106	-108.106	-108.253	-108.251	-108.25	-108.194	-108.194	-108.194	-108.194	-108.253	-108.305	-108.29	-108.234	-108.234	-108.234	-108.234		3.42	-0.046819	-0.0117195	0.0234004	0.100006	0.100006	0.100018	0.100018	-0.00554948	-0.00374257	-0.00204184	0.054015	0.054015	0.0540537	0.0540537	0.0441684	-0.00794844	0.00710768	0.0634267	0.0634267	0.0634641	0.0634641
	3.4	-108.254	-108.218	-108.183	-108.107	-108.107	-108.107	-108.107	-108.254	-108.251	-108.249	-108.194	-108.194	-108.194	-108.194	-108.254	-108.306	-108.29	-108.234	-108.234	-108.234	-108.234		3.41	-0.0470294	-0.0119411	0.0231685	0.0997765	0.0997765	0.0997899	0.0997899	-0.0057599	-0.00383157	-0.00199655	0.05381	0.05381	0.0538535	0.0538535	0.043958	-0.00811443	0.00703913	0.0632155	0.0632155	0.0632495	0.0632495
	3.39	-108.254	-108.219	-108.184	-108.107	-108.107	-108.107	-108.107	-108.254	-108.252	-108.249	-108.194	-108.194	-108.194	-108.194	-108.254	-108.306	-108.29	-108.234	-108.234	-108.234	-108.234		3.4	-0.0472428	-0.0121657	0.0229337	0.0995445	0.0995445	0.0995586	0.0995586	-0.00597327	-0.0039224	-0.00195112	0.053602	0.053602	0.0536504	0.0536504	0.0437446	-0.00828323	0.00696882	0.063001	0.063001	0.0630312	0.0630312
	3.38	-108.254	-108.219	-108.184	-108.107	-108.107	-108.107	-108.107	-108.254	-108.252	-108.249	-108.194	-108.194	-108.194	-108.194	-108.254	-108.306	-108.29	-108.235	-108.235	-108.235	-108.235		3.39	-0.0474592	-0.0123932	0.0226961	0.0993098	0.0993098	0.0993245	0.0993245	-0.00618962	-0.00401511	-0.00190557	0.0533907	0.0533907	0.0534443	0.0534443	0.0435283	-0.00845486	0.00689669	0.0627831	0.0627831	0.0628094	0.0628094
	3.37	-108.254	-108.219	-108.184	-108.107	-108.107	-108.107	-108.107	-108.254	-108.252	-108.249	-108.195	-108.195	-108.195	-108.195	-108.254	-108.306	-108.29	-108.235	-108.235	-108.235	-108.235		3.38	-0.0476785	-0.0126237	0.0224556	0.0990722	0.0990722	0.0990875	0.0990875	-0.00640898	-0.00410973	-0.00185994	0.0531761	0.0531761	0.0532353	0.0532353	0.0433089	-0.00862937	0.00682271	0.0625618	0.0625618	0.0625839	0.0625839
	3.36	-108.254	-108.219	-108.184	-108.108	-108.108	-108.108	-108.108	-108.254	-108.252	-108.249	-108.195	-108.195	-108.195	-108.195	-108.254	-108.306	-108.291	-108.235	-108.235	-108.235	-108.235		3.37	-0.0479009	-0.0128571	0.0222123	0.0988317	0.0988317	0.0988478	0.0988478	-0.00663137	-0.0042063	-0.00181421	0.052958	0.052958	0.0530236	0.0530236	0.0430865	-0.00880681	0.00674683	0.0623368	0.0623368	0.0623549	0.0623549
	3.35	-108.255	-108.22	-108.185	-108.108	-108.108	-108.108	-108.108	-108.255	-108.252	-108.249	-108.195	-108.195	-108.195	-108.195	-108.255	-108.306	-108.291	-108.235	-108.235	-108.235	-108.235		3.36	-0.0481264	-0.0130935	0.0219661	0.0985883	0.0985883	0.0986052	0.0986052	-0.00685682	-0.00430488	-0.0017684	0.0527332	0.0527332	0.0528121	0.0528121	0.0428611	-0.00898723	0.00666903	0.0621065	0.0621065	0.062124	0.062124
	3.34	-108.255	-108.22	-108.185	-108.108	-108.108	-108.108	-108.108	-108.255	-108.252	-108.249	-108.195	-108.195	-108.195	-108.195	-108.255	-108.307	-108.291	-108.236	-108.236	-108.236	-108.236		3.35	-0.0483549	-0.0133329	0.021717	0.0983421	0.0983421	0.0983598	0.0983598	-0.00708536	-0.00440542	-0.00172271	0.0525126	0.0525126	0.0525898	0.0525898	0.0426325	-0.00917054	0.00658927	0.0618769	0.0618769	0.061885	0.061885
	3.33	-108.255	-108.22	-108.185	-108.108	-108.108	-108.108	-108.108	-108.255	-108.252	-108.249	-108.195	-108.195	-108.195	-108.195	-108.255	-108.307	-108.291	-108.236	-108.236	-108.236	-108.236		3.34	-0.0485865	-0.0135754	0.0214651	0.098093	0.098093	0.0981115	0.0981115	-0.00731701	-0.004508	-0.00167682	0.0522848	0.0522848	0.0523685	0.0523685	0.0424009	-0.00935706	0.00650738	0.0616415	0.0616415	0.0616443	0.0616443
	3.32	-108.255	-108.22	-108.185	-108.109	-108.109	-108.109	-108.109	-108.255	-108.252	-108.249	-108.196	-108.196	-108.196	-108.196	-108.255	-108.307	-108.291	-108.236	-108.236	-108.236	-108.236		3.33	-0.0488213	-0.0138209	0.0212102	0.0978411	0.0978411	0.0978604	0.0978604	-0.0075518	-0.00461268	-0.001631	0.0520534	0.0520534	0.052144	0.052144	0.0421661	-0.0095466	0.00642348	0.0613998	0.0613998	0.0614024	0.0614025
	3.31	-108.256	-108.221	-108.186	-108.109	-108.109	-108.109	-108.109	-108.256	-108.252	-108.249	-108.196	-108.196	-108.196	-108.196	-108.256	-108.307	-108.291	-108.236	-108.236	-108.236	-108.236		3.32	-0.0490593	-0.0140694	0.0209525	0.0975862	0.0975862	0.0976064	0.0976064	-0.00778974	-0.00471949	-0.00158522	0.0518186	0.0518186	0.0519163	0.0519163	0.0419282	-0.00973926	0.00633747	0.0611512	0.0611512	0.0611598	0.0611598
	3.3	-108.256	-108.221	-108.186	-108.109	-108.109	-108.109	-108.109	-108.256	-108.252	-108.249	-108.196	-108.196	-108.196	-108.196	-108.256	-108.307	-108.291	-108.237	-108.237	-108.237	-108.237		3.31	-0.0493004	-0.014321	0.0206919	0.0973284	0.0973284	0.0973496	0.0973496	-0.00803088	-0.00482846	-0.0015395	0.0515802	0.0515802	0.0516854	0.0516854	0.041687	-0.00993509	0.00624928	0.0608987	0.0608987	0.0609134	0.0609134
	3.29	-108.256	-108.221	-108.186	-108.109	-108.109	-108.109	-108.109	-108.256	-108.253	-108.249	-108.196	-108.196	-108.196	-108.196	-108.256	-108.308	-108.291	-108.237	-108.237	-108.237	-108.237		3.3	-0.0495448	-0.0145758	0.0204283	0.0970677	0.0970677	0.0970899	0.0970899	-0.00827522	-0.00493961	-0.00149387	0.0513383	0.0513383	0.0514512	0.0514512	0.0414427	-0.0101341	0.00615889	0.060642	0.060642	0.0606632	0.0606632
	3.28	-108.256	-108.221	-108.186	-108.11	-108.11	-108.11	-108.11	-108.256	-108.253	-108.249	-108.197	-108.197	-108.197	-108.197	-108.256	-108.308	-108.291	-108.237	-108.237	-108.237	-108.237		3.29	-0.0497923	-0.0148336	0.0201619	0.0968041	0.0968041	0.0968273	0.0968273	-0.0085228	-0.005053	-0.00144835	0.0510927	0.0510927	0.0512139	0.0512139	0.0411951	-0.0103364	0.00606623	0.0603812	0.0603812	0.0604093	0.0604093
	3.27	-108.257	-108.222	-108.187	-108.11	-108.11	-108.11	-108.11	-108.257	-108.253	-108.249	-108.197	-108.197	-108.197	-108.197	-108.257	-108.308	-108.291	-108.237	-108.237	-108.237	-108.237		3.28	-0.0500432	-0.0150945	0.0198926	0.0965376	0.0965376	0.0965619	0.0965619	-0.00877364	-0.00516866	-0.00140296	0.050843	0.050843	0.0509736	0.0509736	0.0409443	-0.010542	0.00597127	0.0601161	0.0601161	0.0601517	0.0601517
	3.26	-108.257	-108.222	-108.187	-108.11	-108.11	-108.11	-108.11	-108.257	-108.253	-108.249	-108.197	-108.197	-108.197	-108.197	-108.257	-108.308	-108.291	-108.238	-108.238	-108.238	-108.238		3.27	-0.0502973	-0.0153586	0.0196203	0.0962682	0.0962682	0.0962936	0.0962936	-0.00902775	-0.00528665	-0.00135785	0.0505905	0.0505905	0.0507289	0.0507289	0.0406901	-0.0107508	0.00587403	0.0598471	0.0598471	0.0598899	0.0598899
	3.25	-108.257	-108.222	-108.187	-108.111	-108.111	-108.111	-108.111	-108.257	-108.253	-108.249	-108.197	-108.197	-108.197	-108.197	-108.257	-108.308	-108.292	-108.238	-108.238	-108.238	-108.238		3.26	-0.0505547	-0.0156258	0.0193451	0.0959959	0.0959959	0.0960225	0.0960225	-0.00928517	-0.00540691	-0.00131275	0.0503339	0.0503339	0.0504816	0.0504816	0.0404327	-0.0109633	0.00577422	0.0595737	0.0595737	0.0596244	0.0596244
	3.24	-108.257	-108.222	-108.187	-108.111	-108.111	-108.111	-108.111	-108.257	-108.253	-108.249	-108.198	-108.198	-108.198	-108.198	-108.257	-108.309	-108.292	-108.238	-108.238	-108.238	-108.238		3.25	-0.0508154	-0.0158962	0.019067	0.0957206	0.0957206	0.0957484	0.0957484	-0.00954591	-0.00552959	-0.00126797	0.0500735	0.0500735	0.0502308	0.0502308	0.040172	-0.011179	0.00567204	0.0592959	0.0592959	0.0593549	0.0593549
	3.23	-108.258	-108.223	-108.188	-108.111	-108.111	-108.111	-108.111	-108.258	-108.253	-108.249	-108.198	-108.198	-108.198	-108.198	-108.258	-108.309	-108.292	-108.239	-108.239	-108.238	-108.238		3.24	-0.0510795	-0.0161698	0.0187861	0.0954425	0.0954425	0.0954716	0.0954716	-0.00980999	-0.00565468	-0.00122346	0.0498092	0.0498092	0.0499766	0.0499766	0.0399079	-0.0113982	0.00556735	0.0590138	0.0590138	0.0590815	0.0590815
	3.22	-108.258	-108.223	-108.188	-108.111	-108.111	-108.111	-108.111	-108.258	-108.253	-108.249	-108.198	-108.198	-108.198	-108.198	-108.258	-108.309	-108.292	-108.239	-108.239	-108.239	-108.239		3.23	-0.051347	-0.0164465	0.0185022	0.0951614	0.0951614	0.0951918	0.0951918	-0.0100774	-0.00578223	-0.00117924	0.0495411	0.0495411	0.0497189	0.0497189	0.0396405	-0.0116209	0.0054601	0.0587271	0.0587271	0.058804	0.058804
	3.21	-108.258	-108.223	-108.188	-108.112	-108.112	-108.112	-108.112	-108.258	-108.254	-108.249	-108.199	-108.199	-108.198	-108.198	-108.258	-108.309	-108.292	-108.239	-108.239	-108.239	-108.239		3.22	-0.0516178	-0.0167264	0.0182154	0.0948774	0.0948774	0.0949092	0.0949092	-0.0103483	-0.00591227	-0.00113537	0.0492691	0.0492691	0.0494577	0.0494577	0.0393696	-0.0118471	0.00535024	0.058436	0.058436	0.0585224	0.0585224
	3.2	-108.258	-108.224	-108.189	-108.112	-108.112	-108.112	-108.112	-108.258	-108.254	-108.249	-108.199	-108.199	-108.199	-108.199	-108.258	-108.31	-108.292	-108.239	-108.239	-108.239	-108.239		3.21	-0.0518921	-0.0170096	0.0179257	0.0945905	0.0945905	0.0946238	0.0946238	-0.0106225	-0.00604483	-0.00109187	0.0489931	0.0489931	0.0491931	0.0491931	0.0390954	-0.012077	0.00523773	0.0581404	0.0581404	0.0582368	0.0582368
	3.19	-108.259	-108.224	-108.189	-108.112	-108.112	-108.112	-108.112	-108.259	-108.254	-108.249	-108.199	-108.199	-108.199	-108.199	-108.259	-108.31	-108.292	-108.24	-108.24	-108.24	-108.24		3.2	-0.0521697	-0.0172959	0.0176331	0.0943007	0.0943007	0.0943355	0.0943355	-0.0109002	-0.00617997	-0.00104877	0.0487131	0.0487131	0.0489249	0.0489249	0.0388177	-0.0123105	0.0051225	0.0578401	0.0578401	0.0579471	0.0579471
	3.18	-108.259	-108.224	-108.189	-108.113	-108.113	-108.113	-108.113	-108.259	-108.254	-108.248	-108.199	-108.199	-108.199	-108.199	-108.259	-108.31	-108.292	-108.24	-108.24	-108.24	-108.24		3.19	-0.0524508	-0.0175855	0.0173377	0.094008	0.094008	0.0940445	0.0940445	-0.0111813	-0.00631775	-0.00100625	0.048429	0.048429	0.0486529	0.0486529	0.0385366	-0.0125475	0.00500461	0.0575352	0.0575352	0.0576531	0.0576531
	3.17	-108.259	-108.224	-108.19	-108.113	-108.113	-108.113	-108.113	-108.259	-108.254	-108.248	-108.2	-108.2	-108.199	-108.199	-108.259	-108.31	-108.292	-108.24	-108.24	-108.24	-108.24		3.18	-0.0527354	-0.0178782	0.0170393	0.0937124	0.0937124	0.0937505	0.0937505	-0.0114658	-0.00645814	-0.000964094	0.0481409	0.0481409	0.0483776	0.0483776	0.038252	-0.0127884	0.0048838	0.0572256	0.0572256	0.0573549	0.0573549
	3.16	-108.26	-108.225	-108.19	-108.113	-108.113	-108.113	-108.113	-108.26	-108.254	-108.248	-108.2	-108.2	-108.2	-108.2	-108.26	-108.311	-108.293	-108.241	-108.241	-108.24	-108.24		3.17	-0.0530234	-0.0181742	0.0167381	0.0934139	0.0934139	0.0934538	0.0934538	-0.0117539	-0.00660121	-0.000922473	0.0478487	0.0478487	0.0480986	0.0480986	0.037964	-0.013033	0.00476013	0.0569112	0.0569112	0.0570525	0.0570525
	3.15	-108.26	-108.225	-108.19	-108.113	-108.113	-108.113	-108.113	-108.26	-108.254	-108.248	-108.2	-108.2	-108.2	-108.2	-108.26	-108.311	-108.293	-108.241	-108.241	-108.241	-108.241		3.16	-0.0533149	-0.0184735	0.0164341	0.0931125	0.0931125	0.0931543	0.0931543	-0.0120454	-0.00674701	-0.000881425	0.0475523	0.0475523	0.047816	0.047816	0.0376725	-0.0132815	0.00463353	0.056592	0.056592	0.0567459	0.0567459
	3.14	-108.26	-108.225	-108.19	-108.114	-108.114	-108.114	-108.114	-108.26	-108.255	-108.248	-108.201	-108.201	-108.2	-108.2	-108.26	-108.311	-108.293	-108.241	-108.241	-108.241	-108.241		3.15	-0.05361	-0.018776	0.0161272	0.0928083	0.0928083	0.092852	0.092852	-0.0123404	-0.00689556	-0.000840995	0.0472517	0.0472517	0.0475297	0.0475297	0.0373775	-0.0135337	0.00450395	0.0562679	0.0562679	0.0564349	0.0564349
	3.13	-108.26	-108.226	-108.191	-108.114	-108.114	-108.114	-108.114	-108.26	-108.255	-108.248	-108.201	-108.201	-108.201	-108.201	-108.26	-108.311	-108.293	-108.242	-108.242	-108.241	-108.241		3.14	-0.0539085	-0.0190817	0.0158175	0.0925012	0.0925012	0.092547	0.092547	-0.012639	-0.00704691	-0.000801229	0.0469469	0.0469469	0.0472398	0.0472398	0.0370789	-0.0137899	0.00437135	0.055939	0.055939	0.0561195	0.0561195
	3.12	-108.261	-108.226	-108.191	-108.114	-108.114	-108.114	-108.114	-108.261	-108.255	-108.248	-108.201	-108.201	-108.201	-108.201	-108.261	-108.312	-108.293	-108.242	-108.242	-108.242	-108.242		3.13	-0.0542106	-0.0193907	0.0155049	0.0921913	0.0921913	0.0922392	0.0922392	-0.0129411	-0.00720109	-0.000762172	0.0466378	0.0466378	0.0469461	0.0469461	0.0367768	-0.01405	0.00423566	0.055605	0.055605	0.0557998	0.0557998
	3.11	-108.261	-108.226	-108.191	-108.115	-108.115	-108.115	-108.115	-108.261	-108.255	-108.248	-108.202	-108.202	-108.201	-108.201	-108.261	-108.312	-108.293	-108.242	-108.242	-108.242	-108.242		3.12	-0.0545162	-0.0197029	0.0151896	0.0918786	0.0918786	0.0919287	0.0919287	-0.0132467	-0.00735815	-0.000723874	0.0463244	0.0463244	0.0466487	0.0466487	0.0364712	-0.0143141	0.00409684	0.0552661	0.0552661	0.0554756	0.0554756
	3.1	-108.261	-108.227	-108.192	-108.115	-108.115	-108.115	-108.115	-108.261	-108.255	-108.248	-108.202	-108.202	-108.201	-108.201	-108.261	-108.312	-108.293	-108.243	-108.243	-108.242	-108.242		3.11	-0.0548254	-0.0200184	0.0148715	0.091563	0.091563	0.0916155	0.0916155	-0.0135559	-0.00751812	-0.000686382	0.0460066	0.0460066	0.0463475	0.0463475	0.036162	-0.0145822	0.00395482	0.054922	0.054922	0.055147	0.055147
	3.09	-108.262	-108.227	-108.192	-108.115	-108.115	-108.115	-108.115	-108.262	-108.255	-108.248	-108.202	-108.202	-108.202	-108.202	-108.262	-108.312	-108.294	-108.243	-108.243	-108.243	-108.243		3.1	-0.0551382	-0.0203371	0.0145506	0.0912447	0.0912447	0.0912995	0.0912995	-0.0138686	-0.00768104	-0.000649748	0.0456844	0.0456844	0.0460426	0.0460426	0.0358493	-0.0148544	0.00380956	0.0545729	0.0545729	0.054814	0.054814
	3.08	-108.262	-108.227	-108.192	-108.116	-108.116	-108.116	-108.116	-108.262	-108.256	-108.248	-108.203	-108.203	-108.202	-108.202	-108.262	-108.313	-108.294	-108.243	-108.243	-108.243	-108.243		3.09	-0.0554545	-0.0206591	0.014227	0.0909236	0.0909236	0.090981	0.090981	-0.014185	-0.00784695	-0.000614022	0.0453578	0.0453578	0.0457338	0.0457338	0.0355329	-0.0151306	0.003661	0.0542186	0.0542186	0.0544764	0.0544764
	3.07	-108.262	-108.228	-108.193	-108.116	-108.116	-108.116	-108.116	-108.262	-108.256	-108.248	-108.203	-108.203	-108.202	-108.202	-108.262	-108.313	-108.294	-108.244	-108.244	-108.243	-108.243		3.08	-0.0557744	-0.0209844	0.0139006	0.0905997	0.0905997	0.0906597	0.0906597	-0.0145049	-0.00801588	-0.000579259	0.0450266	0.0450266	0.0454213	0.0454213	0.035213	-0.0154111	0.00350909	0.053859	0.053859	0.0541342	0.0541342
	3.06	-108.263	-108.228	-108.193	-108.116	-108.116	-108.116	-108.116	-108.263	-108.256	-108.248	-108.203	-108.203	-108.203	-108.203	-108.263	-108.313	-108.294	-108.244	-108.244	-108.244	-108.244		3.07	-0.0560979	-0.0213128	0.0135716	0.0902731	0.0902731	0.0903359	0.0903359	-0.0148284	-0.00818787	-0.000545512	0.044691	0.044691	0.0451049	0.0451049	0.0348895	-0.0156956	0.00335377	0.0534941	0.0534941	0.0537875	0.0537875
	3.05	-108.263	-108.228	-108.193	-108.117	-108.117	-108.117	-108.117	-108.263	-108.256	-108.248	-108.204	-108.204	-108.203	-108.203	-108.263	-108.314	-108.294	-108.244	-108.244	-108.244	-108.244		3.06	-0.056425	-0.0216445	0.0132399	0.0899438	0.0899438	0.0900095	0.0900095	-0.0151555	-0.00836296	-0.000512836	0.0443507	0.0443507	0.0447846	0.0447846	0.0345624	-0.0159845	0.00319499	0.053124	0.053124	0.0534362	0.0534362
	3.04	-108.263	-108.229	-108.194	-108.117	-108.117	-108.117	-108.117	-108.263	-108.256	-108.248	-108.204	-108.204	-108.203	-108.203	-108.263	-108.314	-108.294	-108.245	-108.245	-108.245	-108.245		3.05	-0.0567557	-0.0219795	0.0129055	0.0896118	0.0896118	0.0896805	0.0896805	-0.0154862	-0.00854119	-0.000481288	0.0440059	0.0440059	0.0444605	0.0444605	0.0342317	-0.0162775	0.00303271	0.0527484	0.0527484	0.0530802	0.0530802
	3.03	-108.264	-108.229	-108.194	-108.117	-108.117	-108.117	-108.117	-108.264	-108.256	-108.248	-108.204	-108.204	-108.204	-108.204	-108.264	-108.314	-108.295	-108.245	-108.245	-108.245	-108.245		3.04	-0.0570901	-0.0223177	0.0125685	0.0892771	0.0892771	0.089349	0.089349	-0.0158205	-0.00872259	-0.000450925	0.0436564	0.0436564	0.0441325	0.0441325	0.0338974	-0.0165749	0.00286685	0.0523674	0.0523674	0.0527196	0.0527196
	3.02	-108.264	-108.229	-108.194	-108.118	-108.118	-108.118	-108.118	-108.264	-108.257	-108.248	-108.205	-108.205	-108.204	-108.204	-108.264	-108.314	-108.295	-108.246	-108.246	-108.245	-108.245		3.03	-0.057428	-0.0226591	0.0122289	0.0889397	0.0889397	0.089015	0.089015	-0.0161585	-0.0089072	-0.000421806	0.0433022	0.0433022	0.0438005	0.0438005	0.0335594	-0.0168767	0.00269738	0.0519809	0.0519809	0.0523543	0.0523543
	3.01	-108.264	-108.23	-108.195	-108.118	-108.118	-108.118	-108.118	-108.264	-108.257	-108.248	-108.205	-108.205	-108.204	-108.204	-108.264	-108.315	-108.295	-108.246	-108.246	-108.246	-108.246		3.02	-0.0577696	-0.0230037	0.0118867	0.0885998	0.0885998	0.0886785	0.0886785	-0.0165	-0.00909506	-0.00039399	0.0429432	0.0429432	0.0434647	0.0434647	0.0332179	-0.0171828	0.00252423	0.0515889	0.0515889	0.0519843	0.0519843
	3	-108.265	-108.23	-108.195	-108.118	-108.118	-108.118	-108.118	-108.265	-108.257	-108.248	-108.205	-108.205	-108.205	-108.205	-108.265	-108.315	-108.295	-108.246	-108.246	-108.246	-108.246		3.01	-0.0581148	-0.0233515	0.0115419	0.0882573	0.0882573	0.0883397	0.0883397	-0.0168452	-0.00928619	-0.000367539	0.0425796	0.0425796	0.0431249	0.0431249	0.0328727	-0.0174933	0.00234737	0.0511913	0.0511913	0.0516096	0.0516096
	2.99	-108.265	-108.23	-108.195	-108.119	-108.119	-108.119	-108.119	-108.265	-108.257	-108.248	-108.206	-108.206	-108.205	-108.205	-108.265	-108.315	-108.295	-108.247	-108.247	-108.246	-108.246		3	-0.0584636	-0.0237026	0.0111947	0.0879122	0.0879122	0.0879984	0.0879984	-0.017194	-0.00948064	-0.000342513	0.0422111	0.0422111	0.0427811	0.0427811	0.0325239	-0.0178083	0.00216673	0.050788	0.050788	0.0512301	0.0512301
	2.98	-108.265	-108.231	-108.196	-108.119	-108.119	-108.119	-108.119	-108.265	-108.257	-108.248	-108.206	-108.206	-108.205	-108.205	-108.265	-108.316	-108.295	-108.247	-108.247	-108.247	-108.247		2.99	-0.058816	-0.0240568	0.010845	0.0875646	0.0875646	0.0876547	0.0876547	-0.0175464	-0.00967844	-0.000318975	0.0418377	0.0418377	0.0424334	0.0424334	0.0321715	-0.0181279	0.00198226	0.0503791	0.0503791	0.0508458	0.0508458
	2.97	-108.266	-108.231	-108.196	-108.119	-108.119	-108.119	-108.119	-108.266	-108.258	-108.248	-108.206	-108.206	-108.206	-108.206	-108.266	-108.316	-108.296	-108.248	-108.248	-108.247	-108.247		2.98	-0.059172	-0.0244142	0.0104928	0.0872145	0.0872145	0.0873088	0.0873088	-0.0179025	-0.00987962	-0.000296994	0.0414595	0.0414595	0.0420817	0.0420817	0.0318154	-0.018452	0.00179392	0.0499644	0.0499644	0.0504567	0.0504567
	2.96	-108.266	-108.231	-108.196	-108.12	-108.12	-108.12	-108.12	-108.266	-108.258	-108.248	-108.207	-108.207	-108.206	-108.206	-108.266	-108.316	-108.296	-108.248	-108.248	-108.248	-108.248		2.97	-0.0595317	-0.0247747	0.0101383	0.0868619	0.0868619	0.0869606	0.0869606	-0.0182621	-0.0100842	-0.000276625	0.0410763	0.0410763	0.0417261	0.0417261	0.0314558	-0.0187806	0.00160165	0.049544	0.049544	0.0500627	0.0500628
	2.95	-108.267	-108.232	-108.197	-108.12	-108.12	-108.12	-108.12	-108.267	-108.258	-108.248	-108.207	-108.207	-108.207	-108.207	-108.267	-108.317	-108.296	-108.249	-108.249	-108.248	-108.248		2.96	-0.0598949	-0.0251385	0.00978135	0.0865069	0.0865069	0.0866101	0.0866101	-0.0186254	-0.0102923	-0.000257937	0.0406882	0.0406882	0.0413664	0.0413664	0.0310925	-0.0191139	0.00140541	0.0491177	0.0491177	0.049664	0.049664
	2.94	-108.267	-108.232	-108.197	-108.12	-108.12	-108.12	-108.12	-108.267	-108.258	-108.248	-108.208	-108.208	-108.207	-108.207	-108.267	-108.317	-108.296	-108.249	-108.249	-108.248	-108.248		2.95	-0.0602618	-0.0255053	0.00942208	0.0861495	0.0861495	0.0862575	0.0862575	-0.0189923	-0.0105038	-0.000240997	0.0402951	0.0402951	0.0410027	0.0410027	0.0307256	-0.0194519	0.00120514	0.0486855	0.0486855	0.0492604	0.0492604
	2.93	-108.267	-108.233	-108.198	-108.121	-108.121	-108.121	-108.121	-108.267	-108.258	-108.248	-108.208	-108.208	-108.207	-108.207	-108.267	-108.317	-108.296	-108.249	-108.249	-108.249	-108.249		2.94	-0.0606323	-0.0258753	0.00906052	0.0857897	0.0857897	0.0859027	0.0859027	-0.0193628	-0.0107189	-0.00022587	0.039897	0.039897	0.0406351	0.0406351	0.0303551	-0.0197945	0.0010008	0.0482474	0.0482474	0.0488518	0.0488518
	2.92	-108.268	-108.233	-108.198	-108.121	-108.121	-108.121	-108.121	-108.268	-108.259	-108.248	-108.208	-108.208	-108.208	-108.208	-108.268	-108.318	-108.297	-108.25	-108.25	-108.249	-108.249		2.93	-0.0610064	-0.0262484	0.0086967	0.0854277	0.0854277	0.0855459	0.0855459	-0.0197368	-0.0109375	-0.000212625	0.0394938	0.0394938	0.0402634	0.0402634	0.0299811	-0.020142	0.000792339	0.0478033	0.0478033	0.0484384	0.0484384
	2.91	-108.268	-108.233	-108.198	-108.122	-108.122	-108.121	-108.121	-108.268	-108.259	-108.248	-108.209	-108.209	-108.208	-108.208	-108.268	-108.318	-108.297	-108.25	-108.25	-108.25	-108.25		2.92	-0.061384	-0.0266245	0.00833067	0.0850633	0.0850633	0.085187	0.085187	-0.0201145	-0.0111597	-0.000201328	0.0390854	0.0390854	0.0398876	0.0398876	0.0296034	-0.0204942	0.000579713	0.0473532	0.0473532	0.0480201	0.0480201
	2.9	-108.268	-108.234	-108.199	-108.122	-108.122	-108.122	-108.122	-108.268	-108.259	-108.248	-108.209	-108.209	-108.208	-108.208	-108.268	-108.318	-108.297	-108.251	-108.251	-108.25	-108.25		2.91	-0.0617652	-0.0270038	0.00796247	0.0846967	0.0846967	0.0848261	0.0848261	-0.0204957	-0.0113855	-0.000192047	0.038672	0.038672	0.0395079	0.0395079	0.0292222	-0.0208512	0.000362874	0.046897	0.046897	0.0475968	0.0475969
	2.89	-108.269	-108.234	-108.199	-108.122	-108.122	-108.122	-108.122	-108.269	-108.259	-108.248	-108.21	-108.21	-108.209	-108.209	-108.269	-108.319	-108.297	-108.251	-108.251	-108.251	-108.251		2.9	-0.06215	-0.0273861	0.00759215	0.0843279	0.0843279	0.0844633	0.0844633	-0.0208805	-0.011615	-0.000184851	0.0382533	0.0382533	0.0391241	0.0391241	0.0288374	-0.0212131	0.000141777	0.0464347	0.0464347	0.0471687	0.0471687
	2.88	-108.269	-108.234	-108.199	-108.123	-108.123	-108.123	-108.123	-108.269	-108.26	-108.248	-108.21	-108.21	-108.209	-108.209	-108.269	-108.319	-108.298	-108.252	-108.252	-108.251	-108.251		2.89	-0.0625384	-0.0277714	0.00721975	0.083957	0.083957	0.0840987	0.0840987	-0.0212688	-0.0118481	-0.000179809	0.0378294	0.0378294	0.0387363	0.0387363	0.0284491	-0.0215799	-8.36213e-05	0.0459662	0.0459662	0.0467355	0.0467355
	2.87	-108.27	-108.235	-108.2	-108.123	-108.123	-108.123	-108.123	-108.27	-108.26	-108.248	-108.211	-108.211	-108.21	-108.21	-108.27	-108.32	-108.298	-108.252	-108.252	-108.251	-108.251		2.88	-0.0629302	-0.0281598	0.00684532	0.083584	0.083584	0.0837322	0.0837322	-0.0216607	-0.012085	-0.000176991	0.0374003	0.0374003	0.0383445	0.0383445	0.0280572	-0.0219516	-0.000313365	0.0454914	0.0454914	0.0462974	0.0462974
	2.86	-108.27	-108.235	-108.2	-108.123	-108.123	-108.123	-108.123	-108.27	-108.26	-108.248	-108.211	-108.211	-108.21	-108.21	-108.27	-108.32	-108.298	-108.253	-108.253	-108.252	-108.252		2.87	-0.0633256	-0.0285511	0.0064689	0.0832089	0.0832089	0.0833639	0.0833639	-0.0220561	-0.0123256	-0.000176464	0.0369659	0.0369659	0.0379487	0.0379487	0.0276618	-0.0223283	-0.000547498	0.0450104	0.0450105	0.0458543	0.0458543
	2.85	-108.27	-108.236	-108.201	-108.124	-108.124	-108.124	-108.124	-108.27	-108.26	-108.248	-108.211	-108.211	-108.21	-108.21	-108.27	-108.32	-108.298	-108.253	-108.253	-108.252	-108.252		2.86	-0.0637245	-0.0289455	0.00609056	0.0828317	0.0828317	0.082994	0.082994	-0.022455	-0.0125699	-0.000178298	0.0365261	0.0365261	0.0375488	0.0375488	0.0272629	-0.02271	-0.00078606	0.0445231	0.0445231	0.0454062	0.0454062
	2.84	-108.271	-108.236	-108.201	-108.124	-108.124	-108.124	-108.124	-108.271	-108.261	-108.248	-108.212	-108.212	-108.211	-108.211	-108.271	-108.321	-108.299	-108.254	-108.254	-108.253	-108.253		2.85	-0.0641269	-0.0293427	0.00571033	0.0824527	0.0824527	0.0826224	0.0826224	-0.0228574	-0.0128181	-0.000182563	0.036081	0.036081	0.0371449	0.0371449	0.0268605	-0.0230968	-0.00102909	0.0440294	0.0440294	0.0449531	0.0449532
	2.83	-108.271	-108.236	-108.201	-108.125	-108.125	-108.124	-108.124	-108.271	-108.261	-108.248	-108.212	-108.212	-108.211	-108.211	-108.271	-108.321	-108.299	-108.254	-108.254	-108.253	-108.253		2.84	-0.0645328	-0.0297429	0.00532827	0.0820717	0.0820717	0.0822492	0.0822492	-0.0232632	-0.0130701	-0.000189326	0.0356305	0.0356305	0.0367369	0.0367369	0.0264547	-0.0234887	-0.00127664	0.0435293	0.0435293	0.0444951	0.0444951
	2.82	-108.272	-108.237	-108.202	-108.125	-108.125	-108.125	-108.125	-108.272	-108.261	-108.248	-108.213	-108.213	-108.212	-108.212	-108.272	-108.322	-108.299	-108.255	-108.255	-108.254	-108.254		2.83	-0.0649421	-0.030146	0.00494443	0.0816888	0.0816888	0.0818745	0.0818745	-0.0236725	-0.0133259	-0.00019866	0.0351745	0.0351745	0.036325	0.036325	0.0260454	-0.0238857	-0.00152873	0.0430228	0.0430228	0.044032	0.044032
	2.81	-108.272	-108.237	-108.202	-108.125	-108.125	-108.125	-108.125	-108.272	-108.261	-108.248	-108.213	-108.213	-108.212	-108.212	-108.272	-108.322	-108.299	-108.255	-108.255	-108.254	-108.254		2.82	-0.0653548	-0.030552	0.00455888	0.0813041	0.0813041	0.0814984	0.0814984	-0.0240853	-0.0135857	-0.00021063	0.0347131	0.0347131	0.035909	0.035909	0.0256326	-0.0242879	-0.00178541	0.0425097	0.0425097	0.0435639	0.0435639
	2.8	-108.272	-108.238	-108.202	-108.126	-108.126	-108.126	-108.126	-108.272	-108.262	-108.248	-108.214	-108.214	-108.212	-108.212	-108.272	-108.322	-108.3	-108.256	-108.256	-108.255	-108.255		2.81	-0.0657709	-0.0309608	0.00417166	0.0809177	0.0809177	0.081121	0.081121	-0.0245014	-0.0138493	-0.000225306	0.0342462	0.0342462	0.0354891	0.0354891	0.0252165	-0.0246953	-0.00204671	0.04199	0.04199	0.0430908	0.0430909
	2.79	-108.273	-108.238	-108.203	-108.126	-108.126	-108.126	-108.126	-108.273	-108.262	-108.248	-108.214	-108.214	-108.213	-108.213	-108.273	-108.323	-108.3	-108.256	-108.256	-108.255	-108.255		2.8	-0.0661904	-0.0313725	0.00378283	0.0805295	0.0805295	0.0807422	0.0807422	-0.0249209	-0.0141169	-0.000242756	0.0337737	0.0337737	0.0350651	0.0350651	0.024797	-0.0251079	-0.00231268	0.0414638	0.0414638	0.0426127	0.0426127
	2.78	-108.273	-108.238	-108.203	-108.127	-108.127	-108.126	-108.126	-108.273	-108.262	-108.248	-108.215	-108.215	-108.213	-108.213	-108.273	-108.323	-108.3	-108.257	-108.257	-108.256	-108.256		2.79	-0.0666133	-0.031787	0.00339244	0.0801397	0.0801397	0.0803622	0.0803622	-0.0253437	-0.0143885	-0.000263046	0.0332956	0.0332956	0.0346372	0.0346372	0.0243742	-0.0255259	-0.00258334	0.0409308	0.0409308	0.0421296	0.0421296
	2.77	-108.274	-108.239	-108.204	-108.127	-108.127	-108.127	-108.127	-108.274	-108.262	-108.248	-108.215	-108.215	-108.214	-108.214	-108.274	-108.324	-108.3	-108.257	-108.257	-108.256	-108.256		2.78	-0.0670394	-0.0322042	0.00300057	0.0797483	0.0797483	0.0799811	0.0799811	-0.0257699	-0.0146641	-0.000286244	0.0328119	0.0328119	0.0342053	0.0342053	0.023948	-0.0259492	-0.00285873	0.0403912	0.0403912	0.0416415	0.0416415
	2.76	-108.274	-108.239	-108.204	-108.127	-108.127	-108.127	-108.127	-108.274	-108.263	-108.248	-108.216	-108.216	-108.214	-108.214	-108.274	-108.324	-108.301	-108.258	-108.258	-108.257	-108.257		2.77	-0.0674689	-0.0326242	0.00260727	0.0793553	0.0793553	0.0795989	0.0795989	-0.0261994	-0.0149437	-0.000312416	0.0323226	0.0323226	0.0337695	0.0337695	0.0235185	-0.0263778	-0.00313888	0.0398448	0.0398448	0.0411484	0.0411484
	2.75	-108.275	-108.24	-108.204	-108.128	-108.128	-108.127	-108.127	-108.275	-108.263	-108.248	-108.216	-108.216	-108.215	-108.215	-108.275	-108.324	-108.301	-108.259	-108.259	-108.257	-108.257		2.76	-0.0679016	-0.0330469	0.00221259	0.0789609	0.0789609	0.0792157	0.0792157	-0.0266321	-0.0152274	-0.000341627	0.0318275	0.0318275	0.0333297	0.0333297	0.0230858	-0.0268118	-0.00342383	0.0392916	0.0392916	0.0406502	0.0406502
	2.74	-108.275	-108.24	-108.205	-108.128	-108.128	-108.128	-108.128	-108.275	-108.263	-108.248	-108.217	-108.217	-108.215	-108.215	-108.275	-108.325	-108.301	-108.259	-108.259	-108.258	-108.258		2.75	-0.0683376	-0.0334722	0.00181661	0.0785651	0.0785651	0.0788316	0.0788316	-0.027068	-0.0155151	-0.000373942	0.0313268	0.0313268	0.032886	0.032886	0.0226499	-0.0272514	-0.00371361	0.0387315	0.0387315	0.040147	0.040147
	2.73	-108.275	-108.241	-108.205	-108.128	-108.128	-108.128	-108.128	-108.275	-108.264	-108.248	-108.217	-108.217	-108.216	-108.216	-108.275	-108.325	-108.302	-108.26	-108.26	-108.258	-108.258		2.74	-0.0687767	-0.0339003	0.00141939	0.0781678	0.0781678	0.0784467	0.0784467	-0.0275072	-0.015807	-0.000409421	0.0308202	0.0308202	0.0324383	0.0324383	0.0222107	-0.0276964	-0.00400824	0.0381644	0.0381644	0.0396389	0.0396389
	2.72	-108.276	-108.241	-108.206	-108.129	-108.129	-108.129	-108.129	-108.276	-108.264	-108.248	-108.218	-108.218	-108.216	-108.216	-108.276	-108.326	-108.302	-108.26	-108.26	-108.259	-108.259		2.73	-0.069219	-0.034331	0.00102099	0.0777693	0.0777693	0.0780611	0.0780611	-0.0279495	-0.016103	-0.000448131	0.0303078	0.0303078	0.0319868	0.0319868	0.0217684	-0.0281469	-0.00430776	0.0375904	0.0375904	0.0391254	0.039126
	2.71	-108.276	-108.241	-108.206	-108.129	-108.129	-108.129	-108.129	-108.276	-108.264	-108.248	-108.218	-108.218	-108.216	-108.216	-108.276	-108.326	-108.302	-108.261	-108.261	-108.259	-108.259		2.72	-0.0696644	-0.0347642	0.000621476	0.0773695	0.0773695	0.0776748	0.0776748	-0.0283949	-0.0164032	-0.000490131	0.0297896	0.0297896	0.0315314	0.0315314	0.021323	-0.028603	-0.00461219	0.0370094	0.0370094	0.0386076	0.0386076
	2.7	-108.277	-108.242	-108.206	-108.13	-108.13	-108.129	-108.129	-108.277	-108.265	-108.248	-108.219	-108.219	-108.217	-108.217	-108.277	-108.327	-108.302	-108.261	-108.261	-108.26	-108.26		2.71	-0.0701129	-0.0352001	0.000220916	0.0769686	0.0769686	0.0772879	0.0772879	-0.0288434	-0.0167075	-0.000535483	0.0292655	0.0292655	0.0310722	0.0310722	0.0208745	-0.0290647	-0.00492157	0.0364213	0.0364213	0.0380844	0.0380844
	2.69	-108.277	-108.242	-108.207	-108.13	-108.13	-108.13	-108.13	-108.277	-108.265	-108.248	-108.219	-108.219	-108.217	-108.217	-108.277	-108.327	-108.303	-108.262	-108.262	-108.26	-108.26		2.7	-0.0705645	-0.0356385	-0.000180621	0.0765665	0.0765665	0.0769006	0.0769006	-0.0292949	-0.0170161	-0.000584244	0.0287354	0.0287354	0.0306091	0.0306091	0.020423	-0.0295321	-0.00523591	0.035826	0.035826	0.0375563	0.0375563
	2.68	-108.278	-108.243	-108.207	-108.13	-108.13	-108.13	-108.13	-108.278	-108.265	-108.248	-108.22	-108.22	-108.218	-108.218	-108.278	-108.328	-108.303	-108.263	-108.263	-108.261	-108.261		2.69	-0.071019	-0.0360794	-0.000583066	0.0761634	0.0761634	0.0765129	0.0765129	-0.0297495	-0.017329	-0.000636473	0.0281993	0.0281993	0.0301422	0.0301422	0.0199684	-0.0300053	-0.00555525	0.0352236	0.0352236	0.0370233	0.0370233
	2.67	-108.278	-108.243	-108.208	-108.131	-108.131	-108.131	-108.131	-108.278	-108.265	-108.248	-108.22	-108.22	-108.218	-108.218	-108.278	-108.328	-108.303	-108.263	-108.263	-108.261	-108.261		2.68	-0.0714765	-0.0365227	-0.000986352	0.0757593	0.0757593	0.076125	0.076125	-0.030207	-0.0176462	-0.000692225	0.0276572	0.0276572	0.0296715	0.0296715	0.0195109	-0.0304841	-0.00587962	0.0346138	0.0346138	0.0364853	0.0364853
	2.66	-108.279	-108.244	-108.208	-108.131	-108.131	-108.131	-108.131	-108.279	-108.266	-108.248	-108.221	-108.221	-108.219	-108.219	-108.279	-108.329	-108.304	-108.264	-108.264	-108.262	-108.262		2.67	-0.0719369	-0.0369686	-0.0013904	0.0753542	0.0753542	0.0757368	0.0757368	-0.0306674	-0.0179676	-0.000751556	0.027109	0.027109	0.0291971	0.0291971	0.0190505	-0.0309688	-0.00620903	0.0339968	0.0339968	0.0359423	0.0359423
	2.65	-108.279	-108.244	-108.208	-108.132	-108.132	-108.131	-108.131	-108.279	-108.266	-108.248	-108.222	-108.222	-108.219	-108.219	-108.279	-108.329	-108.304	-108.265	-108.265	-108.262	-108.262		2.66	-0.0724002	-0.0374168	-0.00179516	0.0749484	0.0749484	0.0753486	0.0753486	-0.0311306	-0.0182935	-0.000814519	0.0265547	0.0265547	0.0287189	0.0287189	0.0185873	-0.0314593	-0.00654351	0.0333723	0.0333723	0.0353944	0.0353944
	2.64	-108.28	-108.245	-108.209	-108.132	-108.132	-108.132	-108.132	-108.28	-108.266	-108.248	-108.222	-108.222	-108.22	-108.22	-108.28	-108.33	-108.304	-108.265	-108.265	-108.263	-108.263		2.65	-0.0728662	-0.0378674	-0.00220053	0.0745417	0.0745417	0.0749604	0.0749604	-0.0315967	-0.0186237	-0.000881168	0.0259942	0.0259942	0.028237	0.028237	0.0181212	-0.0319557	-0.00688309	0.0327404	0.0327404	0.0348416	0.0348416
	2.63	-108.28	-108.245	-108.209	-108.133	-108.133	-108.132	-108.132	-108.28	-108.267	-108.249	-108.223	-108.223	-108.22	-108.22	-108.28	-108.33	-108.305	-108.266	-108.266	-108.264	-108.264		2.64	-0.0733351	-0.0383204	-0.00260646	0.0741343	0.0741343	0.0745724	0.0745724	-0.0320655	-0.0189583	-0.000951552	0.0254275	0.0254275	0.0277514	0.0277514	0.0176524	-0.0324581	-0.00722779	0.032101	0.032101	0.0342839	0.0342839
	2.62	-108.281	-108.245	-108.21	-108.133	-108.133	-108.132	-108.132	-108.281	-108.267	-108.249	-108.223	-108.223	-108.221	-108.221	-108.281	-108.331	-108.305	-108.266	-108.266	-108.264	-108.264		2.63	-0.0738066	-0.0387757	-0.00301286	0.0737262	0.0737262	0.0741846	0.0741846	-0.0325371	-0.0192974	-0.00102572	0.0248545	0.0248545	0.0272622	0.0272622	0.0171808	-0.0329665	-0.00757763	0.031454	0.031454	0.0337213	0.0337213
	2.61	-108.281	-108.246	-108.21	-108.133	-108.133	-108.133	-108.133	-108.281	-108.268	-108.249	-108.224	-108.224	-108.221	-108.221	-108.281	-108.331	-108.306	-108.267	-108.267	-108.265	-108.265		2.62	-0.0742808	-0.0392333	-0.00341966	0.0733176	0.0733176	0.0737971	0.0737971	-0.0330112	-0.019641	-0.00110372	0.0242751	0.0242751	0.0267693	0.0267693	0.0167067	-0.0334809	-0.00793263	0.0307993	0.0307993	0.0331539	0.0331539
	2.6	-108.281	-108.246	-108.21	-108.134	-108.134	-108.133	-108.133	-108.281	-108.268	-108.249	-108.224	-108.224	-108.222	-108.222	-108.281	-108.332	-108.306	-108.268	-108.268	-108.265	-108.265		2.61	-0.0747575	-0.0396931	-0.00382679	0.0729084	0.0729084	0.0734101	0.0734101	-0.033488	-0.0199892	-0.0011856	0.0236894	0.0236894	0.0262728	0.0262728	0.0162299	-0.0340015	-0.00829281	0.0301368	0.0301368	0.0325816	0.0325816
	2.59	-108.282	-108.247	-108.211	-108.134	-108.134	-108.134	-108.134	-108.282	-108.268	-108.249	-108.225	-108.225	-108.222	-108.222	-108.282	-108.332	-108.306	-108.268	-108.268	-108.266	-108.266		2.6	-0.0752368	-0.0401552	-0.00423417	0.0724988	0.0724988	0.0730237	0.0730237	-0.0339673	-0.0203418	-0.0012714	0.0230972	0.0230972	0.0257728	0.0257728	0.0157506	-0.0345282	-0.0086582	0.0294666	0.0294666	0.0320044	0.0320044
	2.58	-108.282	-108.247	-108.211	-108.135	-108.135	-108.134	-108.134	-108.282	-108.269	-108.249	-108.226	-108.226	-108.223	-108.223	-108.282	-108.333	-108.307	-108.269	-108.269	-108.266	-108.266		2.59	-0.0757186	-0.0406195	-0.00464172	0.0720889	0.0720889	0.072638	0.072638	-0.034449	-0.0206991	-0.00136117	0.0224984	0.0224984	0.0252692	0.0252692	0.0152689	-0.0350611	-0.00902883	0.0287884	0.0287884	0.0314224	0.0314224
	2.57	-108.283	-108.248	-108.212	-108.135	-108.135	-108.134	-108.134	-108.283	-108.269	-108.249	-108.226	-108.226	-108.223	-108.223	-108.283	-108.333	-108.307	-108.27	-108.27	-108.267	-108.267		2.58	-0.0762027	-0.041086	-0.00504936	0.0716786	0.0716786	0.0722531	0.0722531	-0.0349332	-0.0210611	-0.00145494	0.021893	0.021893	0.0247621	0.0247621	0.0147847	-0.0356003	-0.0094047	0.0281023	0.0281023	0.0308357	0.0308357
	2.56	-108.283	-108.248	-108.212	-108.135	-108.135	-108.135	-108.135	-108.283	-108.269	-108.249	-108.227	-108.227	-108.224	-108.224	-108.283	-108.334	-108.307	-108.271	-108.271	-108.268	-108.268		2.57	-0.0766892	-0.0415546	-0.00545701	0.0712681	0.0712681	0.0718691	0.0718691	-0.0354197	-0.0214277	-0.00155277	0.021281	0.021281	0.0242516	0.0242516	0.0142982	-0.0361459	-0.00978584	0.027408	0.0274081	0.0302441	0.0302441
	2.55	-108.284	-108.249	-108.213	-108.136	-108.136	-108.135	-108.135	-108.284	-108.27	-108.249	-108.227	-108.227	-108.224	-108.224	-108.284	-108.335	-108.308	-108.271	-108.271	-108.268	-108.268		2.56	-0.077178	-0.0420253	-0.0058646	0.0708574	0.0708574	0.0714862	0.0714862	-0.0359084	-0.0217991	-0.00165468	0.0206623	0.0206623	0.0237376	0.0237376	0.0138095	-0.0366978	-0.0101723	0.0267057	0.0267057	0.0296478	0.0296478
	2.54	-108.284	-108.249	-108.213	-108.136	-108.136	-108.136	-108.136	-108.284	-108.27	-108.249	-108.228	-108.228	-108.225	-108.225	-108.284	-108.335	-108.308	-108.272	-108.272	-108.269	-108.269		2.55	-0.0776689	-0.0424981	-0.00627205	0.0704467	0.0704467	0.0711045	0.0711045	-0.0363994	-0.0221753	-0.00176071	0.0200367	0.0200367	0.0232202	0.0232202	0.0133185	-0.0372563	-0.010564	0.025995	0.025995	0.0290468	0.0290468
	2.53	-108.285	-108.25	-108.213	-108.137	-108.137	-108.136	-108.136	-108.285	-108.27	-108.25	-108.229	-108.229	-108.225	-108.225	-108.285	-108.336	-108.309	-108.273	-108.273	-108.269	-108.269		2.54	-0.078162	-0.042973	-0.00667927	0.0700359	0.0700359	0.0707241	0.0707241	-0.0368924	-0.0225563	-0.0018709	0.0194042	0.0194042	0.0226995	0.0226995	0.0128255	-0.0378213	-0.0109611	0.025276	0.025276	0.028441	0.028441
	2.52	-108.285	-108.25	-108.214	-108.137	-108.137	-108.136	-108.136	-108.285	-108.271	-108.25	-108.229	-108.229	-108.226	-108.226	-108.285	-108.336	-108.309	-108.273	-108.273	-108.27	-108.27		2.53	-0.0786571	-0.0434499	-0.00708618	0.0696252	0.0696252	0.0703452	0.0703452	-0.0373875	-0.0229423	-0.00198529	0.0187647	0.0187647	0.0221754	0.0221754	0.0123304	-0.0383928	-0.0113636	0.0245485	0.0245485	0.0278305	0.0278305
	2.51	-108.286	-108.251	-108.214	-108.137	-108.137	-108.137	-108.137	-108.286	-108.271	-108.25	-108.23	-108.23	-108.226	-108.226	-108.286	-108.337	-108.309	-108.274	-108.274	-108.271	-108.271		2.52	-0.0791541	-0.0439287	-0.0074927	0.0692147	0.0692147	0.0699679	0.0699679	-0.0378846	-0.0233331	-0.00210391	0.0181181	0.0181181	0.021648	0.021648	0.0118333	-0.0389711	-0.0117714	0.0238124	0.0238124	0.0272153	0.0272153
	2.5	-108.286	-108.251	-108.215	-108.138	-108.138	-108.137	-108.137	-108.286	-108.272	-108.25	-108.231	-108.231	-108.227	-108.227	-108.286	-108.337	-108.31	-108.275	-108.275	-108.271	-108.271		2.51	-0.079653	-0.0444096	-0.00789874	0.0688043	0.0688043	0.0695923	0.0695923	-0.0383835	-0.023729	-0.00222679	0.0174643	0.0174643	0.0211173	0.0211173	0.0113344	-0.0395561	-0.0121846	0.0230676	0.0230676	0.0265955	0.0265955
	2.49	-108.287	-108.252	-108.215	-108.138	-108.138	-108.137	-108.137	-108.287	-108.272	-108.25	-108.231	-108.231	-108.227	-108.227	-108.287	-108.338	-108.31	-108.276	-108.276	-108.272	-108.272		2.5	-0.0801537	-0.0448925	-0.00830423	0.0683942	0.0683942	0.0692186	0.0692186	-0.0388842	-0.02413	-0.00235396	0.0168032	0.0168032	0.0205835	0.0205835	0.0108337	-0.040148	-0.0126033	0.022314	0.022314	0.025971	0.025971
	2.48	-108.287	-108.252	-108.215	-108.139	-108.139	-108.138	-108.138	-108.287	-108.272	-108.25	-108.232	-108.232	-108.228	-108.228	-108.287	-108.339	-108.311	-108.276	-108.276	-108.273	-108.273		2.49	-0.0806561	-0.0453772	-0.00870909	0.0679845	0.0679845	0.0688469	0.0688469	-0.0393866	-0.0245361	-0.00248545	0.0161347	0.0161347	0.0200464	0.0200464	0.0103313	-0.0407468	-0.0130274	0.0215515	0.0215515	0.0253419	0.0253419
	2.47	-108.288	-108.253	-108.216	-108.139	-108.139	-108.138	-108.138	-108.288	-108.273	-108.25	-108.233	-108.233	-108.229	-108.229	-108.288	-108.339	-108.311	-108.277	-108.277	-108.273	-108.273		2.48	-0.0811601	-0.0458639	-0.00911321	0.0675752	0.0675752	0.0684774	0.0684774	-0.0398906	-0.0249475	-0.0026213	0.0154587	0.0154587	0.0195061	0.0195061	0.0098273	-0.0413526	-0.0134569	0.0207798	0.0207798	0.0247082	0.0247082
	2.46	-108.288	-108.253	-108.216	-108.139	-108.139	-108.139	-108.139	-108.288	-108.273	-108.25	-108.233	-108.233	-108.229	-108.229	-108.288	-108.34	-108.312	-108.278	-108.278	-108.274	-108.274		2.47	-0.0816656	-0.0463525	-0.00951653	0.0671664	0.0671664	0.0681103	0.0681103	-0.0403961	-0.0253641	-0.00276153	0.0147751	0.0147751	0.0189628	0.0189628	0.0093218	-0.0419655	-0.013892	0.019999	0.019999	0.0240699	0.0240699
	2.45	-108.289	-108.254	-108.217	-108.14	-108.14	-108.139	-108.139	-108.289	-108.274	-108.251	-108.234	-108.234	-108.23	-108.23	-108.289	-108.34	-108.312	-108.279	-108.279	-108.274	-108.274		2.46	-0.0821725	-0.0468429	-0.00991895	0.0667581	0.0667581	0.0677456	0.0677456	-0.040903	-0.0257861	-0.00290617	0.0140837	0.0140837	0.0184163	0.0184163	0.00881489	-0.0425855	-0.0143326	0.0192087	0.0192087	0.0234271	0.0234271
	2.44	-108.289	-108.254	-108.217	-108.14	-108.14	-108.139	-108.139	-108.289	-108.274	-108.251	-108.235	-108.235	-108.23	-108.23	-108.289	-108.341	-108.312	-108.28	-108.28	-108.275	-108.275		2.45	-0.0826807	-0.0473353	-0.0103204	0.0663506	0.0663506	0.0673836	0.0673836	-0.0414112	-0.0262135	-0.00305525	0.0133844	0.0133844	0.0178668	0.0178668	0.00830669	-0.0432129	-0.0147788	0.018409	0.018409	0.0227796	0.0227796
	2.43	-108.29	-108.255	-108.217	-108.141	-108.141	-108.14	-108.14	-108.29	-108.275	-108.251	-108.236	-108.236	-108.231	-108.231	-108.29	-108.342	-108.313	-108.28	-108.28	-108.276	-108.276		2.44	-0.0831901	-0.0478294	-0.0107208	0.0659437	0.0659437	0.0670244	0.0670244	-0.0419206	-0.0266466	-0.0032088	0.012677	0.012677	0.0173142	0.0173142	0.00779729	-0.0438476	-0.0152305	0.0175995	0.0175995	0.0221277	0.0221277
	2.42	-108.29	-108.255	-108.218	-108.141	-108.141	-108.14	-108.14	-108.29	-108.275	-108.251	-108.236	-108.236	-108.231	-108.231	-108.29	-108.342	-108.313	-108.281	-108.281	-108.276	-108.276		2.43	-0.0837006	-0.0483254	-0.01112	0.0655376	0.0655376	0.0666682	0.0666682	-0.0424311	-0.0270852	-0.00336685	0.0119614	0.0119614	0.0167587	0.0167587	0.00728681	-0.0444898	-0.0156879	0.0167802	0.0167802	0.0214712	0.0214712
	2.41	-108.291	-108.256	-108.218	-108.142	-108.142	-108.14	-108.14	-108.291	-108.276	-108.251	-108.237	-108.237	-108.232	-108.232	-108.291	-108.343	-108.314	-108.282	-108.282	-108.277	-108.277		2.42	-0.0842121	-0.0488232	-0.011518	0.0651324	0.0651324	0.0663152	0.0663152	-0.0429425	-0.0275296	-0.00352941	0.0112374	0.0112374	0.0162001	0.0162001	0.00677536	-0.0451396	-0.0161509	0.0159508	0.0159509	0.0208102	0.0208102
	2.4	-108.291	-108.256	-108.219	-108.142	-108.142	-108.141	-108.141	-108.291	-108.276	-108.251	-108.238	-108.238	-108.232	-108.232	-108.291	-108.344	-108.314	-108.283	-108.283	-108.278	-108.278		2.41	-0.0847244	-0.0493228	-0.0119147	0.0647281	0.0647281	0.0659655	0.0659655	-0.0434548	-0.0279798	-0.00369654	0.0105049	0.0105049	0.0156387	0.0156387	0.00626307	-0.0457971	-0.0166196	0.0151112	0.0151112	0.0201447	0.0201447
	2.39	-108.292	-108.257	-108.219	-108.142	-108.142	-108.141	-108.141	-108.292	-108.276	-108.252	-108.239	-108.239	-108.233	-108.233	-108.292	-108.344	-108.315	-108.284	-108.284	-108.278	-108.278		2.4	-0.0852374	-0.0498243	-0.01231	0.0643248	0.0643248	0.0656193	0.0656193	-0.0439678	-0.028436	-0.00386824	0.00976358	0.00976358	0.0150743	0.0150743	0.00575006	-0.0464624	-0.017094	0.0142612	0.0142612	0.0194748	0.0194748
	2.38	-108.293	-108.257	-108.219	-108.143	-108.143	-108.141	-108.141	-108.293	-108.277	-108.252	-108.239	-108.239	-108.234	-108.234	-108.293	-108.345	-108.315	-108.285	-108.285	-108.279	-108.279		2.39	-0.085751	-0.0503275	-0.0127037	0.0639226	0.0639226	0.0652768	0.0652768	-0.0444814	-0.0288982	-0.00404455	0.00901338	0.00901338	0.0145071	0.0145071	0.00523646	-0.0471356	-0.0175741	0.0134005	0.0134005	0.0188004	0.0188004
	2.37	-108.293	-108.258	-108.22	-108.143	-108.143	-108.142	-108.142	-108.293	-108.277	-108.252	-108.24	-108.24	-108.234	-108.234	-108.293	-108.346	-108.316	-108.286	-108.286	-108.28	-108.28		2.38	-0.086265	-0.0508325	-0.0130959	0.0635216	0.0635216	0.0649383	0.0649383	-0.0449955	-0.0293667	-0.00422551	0.00825403	0.00825403	0.013937	0.013937	0.00472239	-0.0478169	-0.01806	0.0125289	0.0125289	0.0181215	0.0181215
	2.36	-108.294	-108.258	-108.22	-108.144	-108.144	-108.142	-108.142	-108.294	-108.278	-108.252	-108.241	-108.241	-108.235	-108.235	-108.294	-108.346	-108.316	-108.286	-108.286	-108.28	-108.28		2.37	-0.0867794	-0.0513394	-0.0134865	0.0631217	0.0631217	0.0646038	0.0646038	-0.0455099	-0.0298415	-0.00441114	0.00748531	0.00748531	0.0133641	0.0133641	0.00420801	-0.0485065	-0.0185518	0.0116462	0.0116462	0.0174381	0.0174381
	2.35	-108.294	-108.259	-108.221	-108.144	-108.144	-108.142	-108.142	-108.294	-108.278	-108.252	-108.242	-108.242	-108.235	-108.235	-108.294	-108.347	-108.317	-108.287	-108.287	-108.281	-108.281		2.36	-0.087294	-0.051848	-0.0138753	0.0627231	0.0627231	0.0642736	0.0642736	-0.0460245	-0.0303228	-0.00460147	0.006707	0.006707	0.0127883	0.0127883	0.00369344	-0.0492043	-0.0190494	0.0107521	0.0107521	0.0167503	0.0167503
	2.34	-108.295	-108.259	-108.221	-108.144	-108.144	-108.143	-108.143	-108.295	-108.279	-108.253	-108.242	-108.242	-108.236	-108.236	-108.295	-108.348	-108.317	-108.288	-108.288	-108.282	-108.282		2.35	-0.0878086	-0.0523585	-0.0142622	0.0623259	0.0623259	0.0639478	0.0639478	-0.0465391	-0.0308107	-0.00479654	0.00591885	0.00591885	0.0122098	0.0122098	0.00317884	-0.0499107	-0.0195529	0.00984644	0.00984644	0.0160581	0.0160581
	2.33	-108.295	-108.26	-108.221	-108.145	-108.145	-108.143	-108.143	-108.295	-108.279	-108.253	-108.243	-108.243	-108.236	-108.236	-108.295	-108.349	-108.318	-108.289	-108.289	-108.283	-108.283		2.34	-0.0883231	-0.0528709	-0.0146473	0.0619301	0.0619301	0.0636268	0.0636268	-0.0470535	-0.0313054	-0.00499639	0.00512059	0.00512059	0.0116284	0.0116284	0.00266437	-0.0506257	-0.0200624	0.00892884	0.00892884	0.0153614	0.0153614
	2.32	-108.296	-108.26	-108.222	-108.145	-108.145	-108.143	-108.143	-108.296	-108.28	-108.253	-108.244	-108.244	-108.237	-108.237	-108.296	-108.349	-108.318	-108.29	-108.29	-108.283	-108.283		2.33	-0.0888373	-0.053385	-0.0150303	0.0615358	0.0615358	0.0633107	0.0633107	-0.0475677	-0.031807	-0.00520106	0.00431195	0.00431195	0.0110444	0.0110444	0.00215018	-0.0513495	-0.0205779	0.00799905	0.00799905	0.0146603	0.0146603
	2.31	-108.296	-108.261	-108.222	-108.146	-108.146	-108.144	-108.144	-108.296	-108.28	-108.253	-108.245	-108.245	-108.238	-108.238	-108.296	-108.35	-108.319	-108.291	-108.291	-108.284	-108.284		2.32	-0.089351	-0.0539011	-0.0154113	0.061143	0.061143	0.0629998	0.0629998	-0.0480815	-0.0323158	-0.00541057	0.00349264	0.00349264	0.0104575	0.0104575	0.00163643	-0.0520822	-0.0210994	0.00705676	0.00705676	0.0139547	0.0139547
	2.3	-108.297	-108.261	-108.222	-108.146	-108.146	-108.144	-108.144	-108.297	-108.281	-108.253	-108.246	-108.246	-108.238	-108.238	-108.297	-108.351	-108.319	-108.292	-108.292	-108.285	-108.285		2.31	-0.0898641	-0.0544191	-0.01579	0.0607518	0.0607518	0.0626941	0.0626941	-0.0485946	-0.0328319	-0.00562499	0.00266236	0.00266236	0.00986794	0.00986794	0.0011233	-0.0528241	-0.0216271	0.00610165	0.00610165	0.0132446	0.0132446
	2.29	-108.297	-108.262	-108.223	-108.146	-108.146	-108.144	-108.144	-108.297	-108.281	-108.254	-108.247	-108.247	-108.239	-108.239	-108.297	-108.352	-108.32	-108.293	-108.293	-108.285	-108.285		2.3	-0.0903765	-0.054939	-0.0161666	0.0603622	0.0603622	0.0623941	0.0623941	-0.0491069	-0.0333555	-0.00584434	0.00182077	0.00182077	0.00927562	0.00927562	0.000610971	-0.0535753	-0.0221609	0.00513339	0.00513339	0.0125301	0.0125301
	2.28	-108.298	-108.262	-108.223	-108.147	-108.147	-108.144	-108.144	-108.298	-108.282	-108.254	-108.247	-108.247	-108.239	-108.239	-108.298	-108.352	-108.32	-108.294	-108.294	-108.286	-108.286		2.29	-0.0908878	-0.0554609	-0.0165408	0.0599744	0.0599744	0.0620999	0.0620999	-0.0496183	-0.0338868	-0.00606868	0.000967529	0.000967529	0.00868056	0.00868056	9.9616e-05	-0.0543361	-0.0227009	0.00415162	0.00415162	0.0118111	0.0118111
	2.27	-108.298	-108.263	-108.224	-108.147	-108.147	-108.145	-108.145	-108.298	-108.283	-108.254	-108.248	-108.248	-108.24	-108.24	-108.298	-108.353	-108.321	-108.295	-108.295	-108.287	-108.287		2.28	-0.091398	-0.0559849	-0.0169126	0.0595883	0.0595883	0.0618118	0.0618118	-0.0501285	-0.0344261	-0.00629807	0.000102283	0.000102283	0.00808276	0.00808276	-0.00041057	-0.0551065	-0.0232473	0.00315597	0.00315597	0.0110875	0.0110875
	2.26	-108.299	-108.263	-108.224	-108.147	-108.147	-108.145	-108.145	-108.299	-108.283	-108.254	-108.249	-108.249	-108.241	-108.241	-108.299	-108.354	-108.322	-108.296	-108.296	-108.288	-108.288		2.27	-0.0919068	-0.0565109	-0.0172819	0.0592041	0.0592041	0.06153	0.06153	-0.0506373	-0.0349735	-0.00653254	-0.000775354	-0.000775354	0.00748221	0.00748221	-0.00091939	-0.0558869	-0.0237999	0.00214604	0.00214604	0.0103595	0.0103595
	2.25	-108.299	-108.264	-108.224	-108.148	-108.148	-108.145	-108.145	-108.299	-108.284	-108.255	-108.25	-108.25	-108.241	-108.241	-108.299	-108.355	-108.322	-108.297	-108.297	-108.288	-108.288		2.26	-0.0924141	-0.0570391	-0.0176486	0.0588217	0.0588217	0.0612548	0.0612548	-0.0511445	-0.0355294	-0.00677217	-0.00166578	-0.00166578	0.00687891	0.00687891	-0.00142664	-0.0566774	-0.024359	0.00112144	0.00112144	0.0096269	0.0096269
	2.24	-108.3	-108.264	-108.225	-108.148	-108.148	-108.146	-108.146	-108.3	-108.284	-108.255	-108.251	-108.251	-108.242	-108.242	-108.3	-108.356	-108.323	-108.298	-108.298	-108.289	-108.289		2.25	-0.0929195	-0.0575695	-0.0180127	0.0584412	0.0584412	0.0609864	0.0609864	-0.05165	-0.036094	-0.00701702	-0.00256942	-0.00256942	0.00627284	0.00627284	-0.00193211	-0.0574783	-0.0249245	8.17345e-05	8.17345e-05	0.00888972	0.00888972
	2.23	-108.3	-108.265	-108.225	-108.149	-108.149	-108.146	-108.146	-108.3	-108.285	-108.255	-108.252	-108.252	-108.242	-108.242	-108.3	-108.356	-108.323	-108.299	-108.299	-108.29	-108.29		2.24	-0.093423	-0.0581021	-0.0183741	0.0580627	0.0580627	0.0607251	0.0607251	-0.0521535	-0.0366675	-0.00726714	-0.00348671	-0.00348671	0.00566399	0.00566399	-0.00243557	-0.0582898	-0.0254966	-0.000973523	-0.000973521	0.00814793	0.00814793
	2.22	-108.301	-108.265	-108.225	-108.149	-108.149	-108.146	-108.146	-108.301	-108.285	-108.255	-108.253	-108.253	-108.243	-108.243	-108.301	-108.357	-108.324	-108.3	-108.3	-108.291	-108.291		2.23	-0.0939242	-0.0586371	-0.0187327	0.0576863	0.0576863	0.0604712	0.0604712	-0.0526547	-0.0372503	-0.00752262	-0.00441812	-0.00441812	0.00505233	0.00505233	-0.0029368	-0.0591121	-0.0260754	-0.00204481	-0.00204481	0.0074015	0.0074015
	2.21	-108.301	-108.266	-108.226	-108.149	-108.149	-108.146	-108.146	-108.301	-108.286	-108.256	-108.254	-108.254	-108.244	-108.244	-108.301	-108.358	-108.324	-108.301	-108.301	-108.291	-108.291		2.22	-0.094423	-0.0591746	-0.0190884	0.0573118	0.0573118	0.060225	0.060225	-0.0531535	-0.0378427	-0.00778352	-0.00536414	-0.00536414	0.00443783	0.00443783	-0.00343557	-0.0599456	-0.0266608	-0.0031326	-0.0031326	0.00665038	0.00665038
	2.2	-108.302	-108.267	-108.226	-108.15	-108.15	-108.147	-108.147	-108.302	-108.287	-108.256	-108.255	-108.255	-108.244	-108.244	-108.302	-108.359	-108.325	-108.303	-108.303	-108.292	-108.292		2.21	-0.0949191	-0.0597147	-0.0194412	0.0569394	0.0569394	0.0599868	0.0599868	-0.0536495	-0.0384449	-0.00804993	-0.00632527	-0.00632527	0.00382047	0.00382047	-0.00393162	-0.0607904	-0.027253	-0.00423742	-0.00423742	0.00589452	0.00589453
	2.19	-108.302	-108.267	-108.226	-108.15	-108.15	-108.147	-108.147	-108.302	-108.287	-108.256	-108.256	-108.256	-108.245	-108.245	-108.302	-108.36	-108.326	-108.304	-108.304	-108.293	-108.293		2.2	-0.0954121	-0.0602574	-0.019791	0.0565692	0.0565692	0.0597568	0.0597568	-0.0541426	-0.0390574	-0.00832193	-0.00730206	-0.00730206	0.00320022	0.00320022	-0.00442471	-0.061647	-0.0278521	-0.00535979	-0.00535979	0.00513389	0.00513389
	2.18	-108.303	-108.268	-108.227	-108.15	-108.15	-108.147	-108.147	-108.303	-108.288	-108.256	-108.257	-108.257	-108.246	-108.246	-108.303	-108.361	-108.326	-108.305	-108.305	-108.294	-108.294		2.19	-0.095902	-0.0608029	-0.0201377	0.0562011	0.0562011	0.0595353	0.0595353	-0.0546325	-0.0396805	-0.00859961	-0.00829506	-0.00829506	0.00257702	0.00257702	-0.00491456	-0.0625155	-0.0284581	-0.00650027	-0.00650027	0.00436843	0.00436843
	2.17	-108.303	-108.268	-108.227	-108.151	-108.151	-108.147	-108.147	-108.303	-108.288	-108.257	-108.258	-108.258	-108.246	-108.246	-108.303	-108.362	-108.327	-108.306	-108.306	-108.294	-108.294		2.18	-0.0963883	-0.0613513	-0.0204813	0.0558351	0.0558351	0.0593228	0.0593228	-0.0551188	-0.0403146	-0.00888307	-0.00930485	-0.00930485	0.00195084	0.00195084	-0.00540091	-0.0633964	-0.0290712	-0.00765944	-0.00765943	0.00359808	0.00359808
	2.16	-108.304	-108.269	-108.227	-108.151	-108.151	-108.147	-108.147	-108.304	-108.289	-108.257	-108.259	-108.259	-108.247	-108.247	-108.304	-108.362	-108.328	-108.307	-108.307	-108.295	-108.295		2.17	-0.0968709	-0.0619028	-0.0208216	0.0554714	0.0554714	0.0591195	0.0591195	-0.0556014	-0.04096	-0.00917241	-0.010332	-0.010332	0.00132163	0.00132163	-0.00588346	-0.0642899	-0.0296914	-0.00883789	-0.00883789	0.00282278	0.00282278
	2.15	-108.304	-108.269	-108.228	-108.152	-108.152	-108.148	-108.148	-108.304	-108.29	-108.257	-108.26	-108.26	-108.247	-108.247	-108.304	-108.363	-108.328	-108.309	-108.309	-108.296	-108.296		2.16	-0.0973494	-0.0624575	-0.0211588	0.0551099	0.0551099	0.0589257	0.0589257	-0.0560798	-0.0416173	-0.00946774	-0.0113773	-0.0113773	0.00068934	0.00068934	-0.00636193	-0.0651963	-0.0303188	-0.0100362	-0.0100362	0.00204247	0.00204247
	2.14	-108.305	-108.27	-108.228	-108.152	-108.152	-108.148	-108.148	-108.305	-108.29	-108.258	-108.261	-108.261	-108.248	-108.248	-108.305	-108.364	-108.329	-108.31	-108.31	-108.297	-108.297		2.15	-0.0978234	-0.0630156	-0.0214926	0.0547506	0.0547506	0.0587418	0.0587418	-0.0565539	-0.0422868	-0.00976917	-0.0124412	-0.0124412	5.39034e-05	5.39034e-05	-0.006836	-0.0661162	-0.0309536	-0.0112552	-0.0112552	0.00125707	0.00125707
	2.13	-108.305	-108.27	-108.228	-108.152	-108.152	-108.148	-108.148	-108.305	-108.291	-108.258	-108.262	-108.262	-108.249	-108.249	-108.305	-108.365	-108.329	-108.311	-108.311	-108.298	-108.298		2.14	-0.0982928	-0.0635773	-0.021823	0.0543935	0.0543935	0.0585682	0.0585682	-0.0570233	-0.042969	-0.0100768	-0.0135244	-0.0135244	-0.000584738	-0.000584738	-0.00730536	-0.0670497	-0.0315958	-0.0124953	-0.0124953	0.000466528	0.000466528
	2.12	-108.305	-108.271	-108.229	-108.153	-108.153	-108.148	-108.148	-108.305	-108.292	-108.258	-108.263	-108.263	-108.249	-108.249	-108.305	-108.366	-108.33	-108.312	-108.312	-108.298	-108.298		2.13	-0.0987571	-0.0641428	-0.0221501	0.0540387	0.0540387	0.0584052	0.0584052	-0.0574876	-0.0436643	-0.0103908	-0.0146278	-0.0146278	-0.00122665	-0.00122665	-0.00776967	-0.0679974	-0.0322455	-0.0137573	-0.0137573	-0.000329244	-0.000329244
	2.11	-108.306	-108.272	-108.229	-108.153	-108.153	-108.148	-108.148	-108.306	-108.293	-108.259	-108.264	-108.264	-108.25	-108.25	-108.306	-108.367	-108.331	-108.314	-108.314	-108.299	-108.299		2.12	-0.099216	-0.0647123	-0.0224736	0.0536861	0.0536861	0.0582532	0.0582532	-0.0579465	-0.0443734	-0.0107113	-0.015752	-0.015752	-0.0018719	-0.0018719	-0.0082286	-0.0689596	-0.0329029	-0.015042	-0.015042	-0.00113032	-0.00113032
	2.1	-108.306	-108.272	-108.229	-108.153	-108.153	-108.148	-108.148	-108.306	-108.293	-108.259	-108.266	-108.266	-108.251	-108.251	-108.306	-108.368	-108.331	-108.315	-108.315	-108.3	-108.3		2.11	-0.0996692	-0.065286	-0.0227936	0.0533358	0.0533358	0.0581126	0.0581126	-0.0583997	-0.0450968	-0.0110385	-0.0168977	-0.0168977	-0.00252057	-0.00252057	-0.00868177	-0.0699368	-0.033568	-0.01635	-0.01635	-0.00193679	-0.00193679
	2.09	-108.307	-108.273	-108.23	-108.154	-108.154	-108.148	-108.148	-108.307	-108.294	-108.259	-108.267	-108.267	-108.251	-108.251	-108.307	-108.369	-108.332	-108.316	-108.316	-108.301	-108.301		2.1	-0.100116	-0.0658643	-0.0231101	0.0529877	0.0529877	0.0579839	0.0579839	-0.0588467	-0.045835	-0.0113724	-0.0180658	-0.0180658	-0.00317273	-0.00317273	-0.00912882	-0.0709295	-0.034241	-0.0176822	-0.0176822	-0.00274872	-0.00274872
	2.08	-108.307	-108.273	-108.23	-108.154	-108.154	-108.148	-108.148	-108.307	-108.295	-108.26	-108.268	-108.268	-108.252	-108.252	-108.307	-108.37	-108.333	-108.318	-108.318	-108.302	-108.302		2.09	-0.100557	-0.0664473	-0.0234229	0.0526418	0.0526418	0.0578673	0.0578673	-0.0592873	-0.0465885	-0.0117132	-0.019257	-0.019257	-0.00382847	-0.00382847	-0.00956937	-0.071938	-0.0349219	-0.0190392	-0.0190392	-0.00356621	-0.00356621
	2.07	-108.308	-108.274	-108.23	-108.154	-108.154	-108.149	-108.149	-108.308	-108.296	-108.26	-108.269	-108.269	-108.253	-108.253	-108.308	-108.371	-108.334	-108.319	-108.319	-108.302	-108.302		2.08	-0.10099	-0.0670354	-0.0237321	0.0522982	0.0522982	0.0577634	0.0577634	-0.0597209	-0.0473582	-0.0120611	-0.0204722	-0.0204722	-0.00448786	-0.00448786	-0.010003	-0.072963	-0.0356109	-0.0204219	-0.0204219	-0.00438935	-0.00438935
	2.06	-108.308	-108.274	-108.231	-108.155	-108.155	-108.149	-108.149	-108.308	-108.296	-108.26	-108.271	-108.271	-108.253	-108.253	-108.308	-108.372	-108.334	-108.321	-108.321	-108.303	-108.303		2.07	-0.101417	-0.0676289	-0.0240375	0.0519567	0.0519567	0.0576727	0.0576727	-0.0601472	-0.0481445	-0.0124163	-0.0217122	-0.0217122	-0.005151	-0.005151	-0.0104293	-0.0740049	-0.0363081	-0.0218311	-0.0218311	-0.00521821	-0.00521821
	2.05	-108.309	-108.275	-108.231	-108.155	-108.155	-108.149	-108.149	-108.309	-108.297	-108.261	-108.272	-108.272	-108.254	-108.254	-108.309	-108.373	-108.335	-108.322	-108.322	-108.304	-108.304		2.06	-0.101835	-0.0682281	-0.0243393	0.0516174	0.0516174	0.0575955	0.0575955	-0.0605658	-0.0489482	-0.012779	-0.0229779	-0.0229779	-0.00581796	-0.00581796	-0.0108479	-0.0750643	-0.0370136	-0.0232676	-0.0232676	-0.0060529	-0.0060529
	2.04	-108.309	-108.276	-108.231	-108.155	-108.155	-108.149	-108.149	-108.309	-108.298	-108.261	-108.273	-108.273	-108.255	-108.255	-108.309	-108.374	-108.336	-108.323	-108.323	-108.305	-108.305		2.05	-0.102246	-0.0688334	-0.0246372	0.0512803	0.0512803	0.0575323	0.0575323	-0.0609761	-0.04977	-0.0131493	-0.0242701	-0.0242701	-0.00648885	-0.00648885	-0.0112582	-0.0761418	-0.0377275	-0.0247323	-0.0247323	-0.00689349	-0.00689349
	2.03	-108.309	-108.276	-108.231	-108.156	-108.156	-108.149	-108.149	-108.309	-108.299	-108.261	-108.274	-108.274	-108.255	-108.255	-108.309	-108.376	-108.336	-108.325	-108.325	-108.306	-108.306		2.04	-0.102647	-0.0694452	-0.0249314	0.0509452	0.0509452	0.0574837	0.0574837	-0.0613777	-0.0506107	-0.0135274	-0.0255898	-0.0255898	-0.00716374	-0.00716374	-0.0116598	-0.0772379	-0.0384499	-0.026226	-0.026226	-0.00774007	-0.00774007
	2.02	-108.31	-108.277	-108.232	-108.156	-108.156	-108.149	-108.149	-108.31	-108.3	-108.262	-108.276	-108.276	-108.256	-108.256	-108.31	-108.377	-108.337	-108.327	-108.327	-108.307	-108.307		2.03	-0.10304	-0.0700639	-0.0252217	0.0506123	0.0506123	0.0574502	0.0574502	-0.0617702	-0.051471	-0.0139136	-0.0269379	-0.0269379	-0.00784274	-0.00784274	-0.0120523	-0.0783533	-0.039181	-0.0277496	-0.0277496	-0.00859273	-0.00859273
	2.01	-108.31	-108.278	-108.232	-108.156	-108.156	-108.149	-108.149	-108.31	-108.301	-108.262	-108.277	-108.277	-108.257	-108.257	-108.31	-108.378	-108.338	-108.328	-108.328	-108.308	-108.308		2.02	-0.103422	-0.0706899	-0.0255081	0.0502813	0.0502813	0.0574323	0.0574323	-0.0621529	-0.0523518	-0.0143081	-0.0283152	-0.0283152	-0.00852592	-0.00852592	-0.012435	-0.0794887	-0.0399208	-0.029304	-0.029304	-0.00945155	-0.00945155
	2	-108.31	-108.278	-108.232	-108.157	-108.157	-108.149	-108.149	-108.31	-108.302	-108.263	-108.279	-108.279	-108.257	-108.257	-108.31	-108.379	-108.339	-108.33	-108.33	-108.308	-108.308		2.01	-0.103795	-0.0713238	-0.0257907	0.0499524	0.0499524	0.0574305	0.0574305	-0.0625254	-0.0532539	-0.014711	-0.0297229	-0.0297229	-0.00921337	-0.00921337	-0.0128075	-0.0806447	-0.0406696	-0.03089	-0.03089	-0.0103166	-0.0103166
	1.99	-108.311	-108.279	-108.233	-108.157	-108.157	-108.149	-108.149	-108.311	-108.303	-108.263	-108.28	-108.28	-108.258	-108.258	-108.311	-108.38	-108.339	-108.331	-108.331	-108.309	-108.309		2	-0.104157	-0.0719661	-0.0260693	0.0496254	0.0496254	0.0574455	0.0574455	-0.0628872	-0.0541782	-0.0151226	-0.0311616	-0.0311616	-0.00990518	-0.00990518	-0.0131693	-0.081822	-0.0414273	-0.0325087	-0.0325087	-0.011188	-0.011188
	1.98	-108.311	-108.28	-108.233	-108.157	-108.157	-108.152	-108.152	-108.311	-108.304	-108.264	-108.282	-108.282	-108.259	-108.259	-108.311	-108.381	-108.34	-108.333	-108.333	-108.31	-108.31		1.99	-0.104507	-0.0726172	-0.026344	0.0493003	0.0493003	0.0568457	0.0568457	-0.0632376	-0.0551257	-0.0155433	-0.0326325	-0.0326325	-0.0106014	-0.0106014	-0.0135197	-0.0830214	-0.0421941	-0.0341608	-0.0341608	-0.0120657	-0.0120657
	1.97	-108.311	-108.28	-108.233	-108.158	-108.158	-108.155	-108.155	-108.311	-108.305	-108.264	-108.283	-108.283	-108.26	-108.26	-108.311	-108.383	-108.341	-108.335	-108.335	-108.311	-108.311		1.98	-0.104846	-0.0732779	-0.0266147	0.048977	0.048977	0.0540586	0.0540586	-0.063576	-0.0560973	-0.0159731	-0.0341365	-0.0341365	-0.0113022	-0.0113022	-0.0138581	-0.0842437	-0.0429702	-0.0358472	-0.0358472	-0.0129499	-0.0129499
	1.96	-108.312	-108.281	-108.233	-108.158	-108.158	-108.158	-108.158	-108.312	-108.306	-108.264	-108.285	-108.285	-108.26	-108.26	-108.312	-108.384	-108.342	-108.337	-108.337	-108.312	-108.312		1.97	-0.105171	-0.0739486	-0.0268814	0.0486554	0.0486554	0.0512356	0.0512356	-0.0639019	-0.057094	-0.0164124	-0.0356746	-0.0356746	-0.0120075	-0.0120075	-0.014184	-0.0854897	-0.0437556	-0.037569	-0.037569	-0.0138405	-0.0138405
	1.95	-108.312	-108.282	-108.234	-108.161	-108.161	-108.158	-108.158	-108.312	-108.307	-108.265	-108.286	-108.286	-108.261	-108.261	-108.312	-108.385	-108.343	-108.338	-108.338	-108.313	-108.313		1.96	-0.105484	-0.0746302	-0.0271441	0.0483356	0.0483356	0.0483767	0.0483767	-0.0642145	-0.058117	-0.0168615	-0.0372476	-0.0372476	-0.0127175	-0.0127175	-0.0144966	-0.0867601	-0.0445503	-0.0393269	-0.0393269	-0.0147377	-0.0147377
	1.94	-108.312	-108.282	-108.234	-108.164	-108.164	-108.159	-108.159	-108.312	-108.308	-108.265	-108.288	-108.288	-108.262	-108.262	-108.312	-108.387	-108.343	-108.34	-108.34	-108.314	-108.314		1.95	-0.105783	-0.0753232	-0.0274027	0.0454818	0.0454818	0.0480174	0.0480174	-0.0645131	-0.0591672	-0.0173205	-0.0388565	-0.0388565	-0.0134322	-0.0134322	-0.0147952	-0.088056	-0.0453547	-0.0411219	-0.0411219	-0.0156414	-0.0156414
	1.93	-108.313	-108.283	-108.234	-108.167	-108.167	-108.159	-108.159	-108.313	-108.309	-108.266	-108.29	-108.29	-108.262	-108.262	-108.313	-108.388	-108.344	-108.342	-108.342	-108.315	-108.315		1.94	-0.106067	-0.0760285	-0.0276573	0.0425506	0.0425506	0.0477008	0.0477008	-0.0647972	-0.0602459	-0.0177899	-0.0405023	-0.0405023	-0.0141516	-0.0141516	-0.0150793	-0.0893781	-0.0461686	-0.0429549	-0.0429549	-0.0165517	-0.0165517
	1.92	-108.313	-108.284	-108.234	-108.17	-108.17	-108.159	-108.159	-108.313	-108.31	-108.266	-108.291	-108.291	-108.263	-108.263	-108.313	-108.389	-108.345	-108.344	-108.344	-108.316	-108.316		1.93	-0.106335	-0.0767468	-0.0279078	0.0395831	0.0395831	0.0473857	0.0473857	-0.0650659	-0.0613541	-0.01827	-0.0421859	-0.0421859	-0.0148758	-0.0148758	-0.015348	-0.0907276	-0.0469923	-0.0448267	-0.0448267	-0.0174685	-0.0174685
	1.91	-108.313	-108.284	-108.235	-108.173	-108.173	-108.159	-108.159	-108.313	-108.311	-108.267	-108.293	-108.293	-108.264	-108.264	-108.313	-108.391	-108.346	-108.346	-108.346	-108.317	-108.317		1.92	-0.106588	-0.077479	-0.0281542	0.0365792	0.0365792	0.0470719	0.0470719	-0.0653184	-0.0624932	-0.018761	-0.0439082	-0.0439082	-0.0156048	-0.0156048	-0.0156005	-0.0921052	-0.0478257	-0.0467382	-0.0467382	-0.0183919	-0.0183919
	1.9	-108.313	-108.285	-108.235	-108.176	-108.176	-108.16	-108.16	-108.313	-108.312	-108.267	-108.295	-108.295	-108.265	-108.265	-108.313	-108.392	-108.347	-108.348	-108.348	-108.318	-108.318		1.91	-0.106824	-0.078226	-0.0283964	0.0335387	0.0335387	0.0467596	0.0467596	-0.065554	-0.0636644	-0.0192632	-0.0456701	-0.0456701	-0.0163386	-0.0163386	-0.0158361	-0.0935121	-0.048669	-0.0486902	-0.0486902	-0.0193218	-0.0193218
	1.89	-108.313	-108.286	-108.235	-108.179	-108.179	-108.16	-108.16	-108.313	-108.314	-108.268	-108.297	-108.297	-108.265	-108.265	-108.313	-108.394	-108.348	-108.35	-108.35	-108.318	-108.318		1.9	-0.107041	-0.0789888	-0.0286345	0.0304614	0.0304614	0.0464485	0.0464485	-0.0657719	-0.0648691	-0.019777	-0.0474725	-0.0474725	-0.0170771	-0.0170771	-0.016054	-0.0949494	-0.0495223	-0.0506835	-0.0506835	-0.0202581	-0.0202581
	1.88	-108.314	-108.287	-108.235	-108.182	-108.182	-108.16	-108.16	-108.314	-108.315	-108.268	-108.299	-108.299	-108.266	-108.266	-108.314	-108.395	-108.349	-108.352	-108.352	-108.319	-108.319		1.89	-0.107241	-0.0797684	-0.0288683	0.0273473	0.0273473	0.0461386	0.0461386	-0.065971	-0.0661084	-0.0203028	-0.0493162	-0.0493162	-0.0178204	-0.0178204	-0.0162531	-0.0964181	-0.0503856	-0.052719	-0.052719	-0.0212007	-0.0212007
	1.87	-108.314	-108.288	-108.236	-108.185	-108.185	-108.161	-108.161	-108.314	-108.316	-108.269	-108.301	-108.301	-108.267	-108.267	-108.314	-108.397	-108.349	-108.354	-108.354	-108.32	-108.32		1.88	-0.10742	-0.0805658	-0.029098	0.0241961	0.0241961	0.0458298	0.0458298	-0.0661507	-0.067384	-0.0208409	-0.0512021	-0.0512021	-0.0185684	-0.0185684	-0.0164328	-0.0979194	-0.051259	-0.0547975	-0.0547975	-0.0221497	-0.0221497
	1.86	-108.314	-108.288	-108.236	-108.188	-108.188	-108.161	-108.161	-108.314	-108.318	-108.269	-108.303	-108.303	-108.268	-108.268	-108.314	-108.398	-108.35	-108.356	-108.356	-108.321	-108.321		1.87	-0.107579	-0.0813823	-0.0293233	0.0210078	0.0210078	0.0455221	0.0455221	-0.0663098	-0.0686971	-0.0213917	-0.0531309	-0.0531309	-0.0193211	-0.0193211	-0.0165919	-0.0994544	-0.0521425	-0.0569196	-0.0569196	-0.0231047	-0.0231047
	1.85	-108.314	-108.289	-108.236	-108.192	-108.192	-108.161	-108.161	-108.314	-108.319	-108.27	-108.305	-108.305	-108.268	-108.268	-108.314	-108.4	-108.351	-108.359	-108.359	-108.322	-108.322		1.86	-0.107717	-0.082219	-0.0295444	0.0177822	0.0177822	0.0452154	0.0452154	-0.0664474	-0.0700492	-0.0219555	-0.0551034	-0.0551034	-0.0200782	-0.0200782	-0.0167295	-0.101024	-0.0530361	-0.0590861	-0.0590861	-0.0240656	-0.0240656
	1.84	-108.314	-108.29	-108.236	-108.195	-108.195	-108.162	-108.162	-108.314	-108.32	-108.271	-108.307	-108.307	-108.269	-108.269	-108.314	-108.402	-108.352	-108.361	-108.361	-108.323	-108.323		1.85	-0.107832	-0.0830771	-0.0297611	0.0145192	0.0145192	0.0449095	0.0449095	-0.0665626	-0.071442	-0.0225328	-0.0571203	-0.0571203	-0.0208398	-0.0208398	-0.0168447	-0.102631	-0.05394	-0.0612977	-0.0612977	-0.0250323	-0.0250323
	1.83	-108.314	-108.291	-108.236	-108.198	-108.198	-108.162	-108.162	-108.314	-108.322	-108.271	-108.309	-108.309	-108.27	-108.27	-108.314	-108.403	-108.353	-108.363	-108.363	-108.324	-108.324		1.84	-0.107924	-0.0839581	-0.0299734	0.0112187	0.0112187	0.0446046	0.0446046	-0.0666541	-0.0728768	-0.023124	-0.0591824	-0.0591824	-0.0216055	-0.0216055	-0.0169362	-0.104274	-0.0548541	-0.063555	-0.063555	-0.0260045	-0.0260045
	1.82	-108.314	-108.292	-108.237	-108.202	-108.202	-108.162	-108.162	-108.314	-108.323	-108.272	-108.311	-108.311	-108.271	-108.271	-108.314	-108.405	-108.354	-108.365	-108.365	-108.325	-108.325		1.83	-0.10799	-0.0848634	-0.0301812	0.00788053	0.00788053	0.0443004	0.0443004	-0.0667209	-0.0743553	-0.0237295	-0.0612903	-0.0612903	-0.0223754	-0.0223754	-0.017003	-0.105957	-0.0557784	-0.0658586	-0.0658586	-0.026982	-0.026982
	1.81	-108.314	-108.293	-108.237	-108.205	-108.205	-108.163	-108.163	-108.314	-108.325	-108.273	-108.313	-108.313	-108.271	-108.271	-108.314	-108.407	-108.355	-108.368	-108.368	-108.326	-108.326		1.82	-0.108031	-0.0857943	-0.0303844	0.00450462	0.00450462	0.0439969	0.0439969	-0.0667619	-0.0758791	-0.0243497	-0.0634445	-0.0634445	-0.023149	-0.023149	-0.017044	-0.107679	-0.0567129	-0.0682091	-0.0682091	-0.0279643	-0.0279643
	1.8	-108.314	-108.294	-108.237	-108.209	-108.209	-108.163	-108.163	-108.314	-108.327	-108.273	-108.315	-108.315	-108.272	-108.272	-108.314	-108.408	-108.356	-108.37	-108.37	-108.327	-108.327		1.81	-0.108045	-0.0867526	-0.0305831	0.00109089	0.00109089	0.0436942	0.0436942	-0.0667758	-0.0774498	-0.0249851	-0.0656458	-0.0656458	-0.0239263	-0.0239263	-0.0170579	-0.109444	-0.0576576	-0.070607	-0.070607	-0.0289512	-0.0289512
	1.79	-108.314	-108.295	-108.237	-108.212	-108.212	-108.163	-108.163	-108.314	-108.328	-108.274	-108.318	-108.318	-108.273	-108.273	-108.314	-108.41	-108.357	-108.373	-108.373	-108.328	-108.328		1.8	-0.108031	-0.0877398	-0.030777	-0.00236075	-0.00236075	0.0433921	0.0433921	-0.0667614	-0.0790691	-0.0256361	-0.0678945	-0.0678945	-0.0247068	-0.0247068	-0.0170435	-0.111251	-0.0586125	-0.0730528	-0.0730528	-0.0299423	-0.0299423
	1.78	-108.314	-108.296	-108.237	-108.216	-108.216	-108.164	-108.164	-108.314	-108.33	-108.275	-108.32	-108.32	-108.274	-108.274	-108.314	-108.412	-108.358	-108.375	-108.375	-108.329	-108.329		1.79	-0.107987	-0.0887576	-0.0309661	-0.00585036	-0.00585036	0.0430907	0.0430907	-0.0667173	-0.0807387	-0.0263033	-0.0701912	-0.0701912	-0.0254902	-0.0254902	-0.0169994	-0.113102	-0.0595775	-0.0755469	-0.0755469	-0.0309371	-0.0309371
	1.77	-108.314	-108.297	-108.238	-108.219	-108.219	-108.166	-108.166	-108.314	-108.332	-108.275	-108.322	-108.322	-108.275	-108.275	-108.314	-108.414	-108.359	-108.378	-108.378	-108.33	-108.33		1.78	-0.107912	-0.0898078	-0.0311503	-0.00937796	-0.00937796	0.0425168	0.0425168	-0.0666422	-0.0824602	-0.0269871	-0.0725362	-0.0725362	-0.0262762	-0.0262762	-0.0169243	-0.115	-0.0605526	-0.0780897	-0.0780897	-0.031935	-0.031935
	1.76	-108.314	-108.298	-108.238	-108.223	-108.223	-108.168	-108.168	-108.314	-108.334	-108.276	-108.325	-108.325	-108.275	-108.275	-108.314	-108.416	-108.36	-108.381	-108.381	-108.331	-108.331		1.77	-0.107804	-0.0908922	-0.0313294	-0.0129436	-0.0129436	0.0403642	0.0403642	-0.0665346	-0.0842353	-0.027688	-0.0749301	-0.0749301	-0.0270643	-0.0270643	-0.0168167	-0.116945	-0.0615377	-0.0806816	-0.0806816	-0.0329356	-0.0329356
	1.75	-108.314	-108.299	-108.238	-108.226	-108.226	-108.17	-108.17	-108.314	-108.335	-108.277	-108.327	-108.327	-108.276	-108.276	-108.314	-108.418	-108.361	-108.383	-108.383	-108.332	-108.332		1.76	-0.107663	-0.0920128	-0.0315033	-0.0165473	-0.0165473	0.0382099	0.0382099	-0.066393	-0.0860658	-0.0284066	-0.077373	-0.077373	-0.0278539	-0.0278539	-0.0166751	-0.118938	-0.0625327	-0.0833227	-0.0833227	-0.0339382	-0.0339382
	1.74	-108.314	-108.301	-108.238	-108.23	-108.23	-108.172	-108.172	-108.314	-108.337	-108.277	-108.33	-108.33	-108.277	-108.277	-108.314	-108.42	-108.362	-108.386	-108.386	-108.333	-108.333		1.75	-0.107485	-0.0931716	-0.0316717	-0.0201889	-0.0201889	0.0360552	0.0360552	-0.0662159	-0.0879534	-0.0291434	-0.0798652	-0.0798652	-0.0286447	-0.0286447	-0.016498	-0.120982	-0.0635375	-0.0860133	-0.0860133	-0.0349421	-0.0349421
	1.73	-108.313	-108.302	-108.238	-108.234	-108.234	-108.175	-108.175	-108.313	-108.339	-108.278	-108.333	-108.333	-108.278	-108.278	-108.313	-108.422	-108.363	-108.389	-108.389	-108.334	-108.334		1.74	-0.107271	-0.0943706	-0.0318346	-0.0238686	-0.0238686	0.0339015	0.0339015	-0.0660016	-0.0898997	-0.029899	-0.0824071	-0.0824071	-0.0294358	-0.0294358	-0.0162837	-0.123077	-0.0645519	-0.0887536	-0.0887536	-0.0359465	-0.0359465
	1.72	-108.313	-108.303	-108.238	-108.238	-108.238	-108.177	-108.177	-108.313	-108.342	-108.279	-108.335	-108.335	-108.279	-108.279	-108.313	-108.425	-108.364	-108.392	-108.392	-108.335	-108.335		1.73	-0.107018	-0.0956119	-0.0319916	-0.0275861	-0.0275861	0.0317504	0.0317504	-0.0657485	-0.0919065	-0.0306739	-0.0849986	-0.0849986	-0.0302268	-0.0302268	-0.0160306	-0.125226	-0.0655758	-0.0915436	-0.0915436	-0.0369506	-0.0369506
	1.71	-108.313	-108.304	-108.239	-108.241	-108.241	-108.179	-108.179	-108.313	-108.344	-108.28	-108.338	-108.338	-108.279	-108.279	-108.313	-108.427	-108.365	-108.395	-108.395	-108.336	-108.336		1.72	-0.106724	-0.0968976	-0.0321426	-0.0313414	-0.0313414	0.0296032	0.0296032	-0.0654547	-0.0939753	-0.0314688	-0.0876398	-0.0876398	-0.0310167	-0.0310167	-0.0157368	-0.12743	-0.0666091	-0.0943833	-0.0943833	-0.0379535	-0.0379535
	1.7	-108.312	-108.306	-108.239	-108.245	-108.245	-108.181	-108.181	-108.312	-108.346	-108.281	-108.341	-108.341	-108.28	-108.28	-108.312	-108.429	-108.366	-108.397	-108.397	-108.337	-108.337		1.71	-0.106388	-0.09823	-0.0322872	-0.0351342	-0.0351342	0.0274616	0.0274616	-0.0651184	-0.0961079	-0.0322842	-0.0903309	-0.0903309	-0.0318049	-0.0318049	-0.0154005	-0.129689	-0.0676515	-0.0972727	-0.0972727	-0.0389542	-0.0389542
	1.69	-108.312	-108.307	-108.239	-108.249	-108.249	-108.183	-108.183	-108.312	-108.348	-108.282	-108.343	-108.343	-108.281	-108.281	-108.312	-108.432	-108.367	-108.4	-108.4	-108.338	-108.338		1.7	-0.106007	-0.0996112	-0.032425	-0.0389646	-0.0389646	0.0253273	0.0253273	-0.0647376	-0.0983057	-0.0331209	-0.0930717	-0.0930717	-0.0325903	-0.0325903	-0.0150197	-0.132006	-0.0687028	-0.100212	-0.100212	-0.0399516	-0.0399516
	1.68	-108.311	-108.309	-108.239	-108.253	-108.253	-108.185	-108.185	-108.311	-108.35	-108.282	-108.346	-108.346	-108.282	-108.282	-108.311	-108.434	-108.368	-108.403	-108.403	-108.339	-108.339		1.69	-0.10558	-0.101044	-0.0325558	-0.042832	-0.042832	0.0232019	0.0232019	-0.0643103	-0.10057	-0.0339794	-0.0958621	-0.0958621	-0.0333721	-0.0333721	-0.0145924	-0.134382	-0.0697628	-0.1032	-0.1032	-0.0409446	-0.0409446
	1.67	-108.311	-108.31	-108.239	-108.257	-108.257	-108.187	-108.187	-108.311	-108.353	-108.283	-108.349	-108.349	-108.282	-108.282	-108.311	-108.437	-108.369	-108.407	-108.407	-108.34	-108.34		1.68	-0.105104	-0.102529	-0.0326791	-0.0467364	-0.0467364	0.0210872	0.0210872	-0.0638343	-0.102903	-0.0348604	-0.0987019	-0.0987019	-0.034149	-0.034149	-0.0141164	-0.136818	-0.0708312	-0.106238	-0.106238	-0.0419318	-0.0419318
	1.66	-108.31	-108.312	-108.239	-108.261	-108.261	-108.189	-108.189	-108.31	-108.355	-108.284	-108.352	-108.352	-108.283	-108.283	-108.31	-108.439	-108.37	-108.41	-108.41	-108.341	-108.341		1.67	-0.104577	-0.104071	-0.0327944	-0.0506774	-0.0506774	0.0189852	0.0189852	-0.0633075	-0.105306	-0.0357647	-0.101591	-0.101591	-0.03492	-0.03492	-0.0135896	-0.139315	-0.0719078	-0.109324	-0.109324	-0.0429119	-0.0429119
	1.65	-108.31	-108.314	-108.239	-108.265	-108.265	-108.191	-108.191	-108.31	-108.358	-108.285	-108.355	-108.355	-108.284	-108.284	-108.31	-108.442	-108.371	-108.413	-108.413	-108.342	-108.342		1.66	-0.103997	-0.10567	-0.0329012	-0.0546545	-0.0546545	0.0168977	0.0168977	-0.0627274	-0.10778	-0.0366929	-0.104528	-0.104528	-0.0356838	-0.0356838	-0.0130095	-0.141875	-0.0729922	-0.112458	-0.112458	-0.0438834	-0.0438834
	1.64	-108.309	-108.315	-108.239	-108.269	-108.269	-108.193	-108.193	-108.309	-108.36	-108.286	-108.358	-108.358	-108.285	-108.285	-108.309	-108.444	-108.372	-108.416	-108.416	-108.343	-108.343		1.65	-0.103361	-0.10733	-0.0329989	-0.0586672	-0.0586672	0.014827	0.014827	-0.0620916	-0.110325	-0.0376458	-0.107514	-0.107514	-0.0364389	-0.0364389	-0.0123738	-0.144499	-0.074084	-0.11564	-0.11564	-0.0448446	-0.0448446
	1.63	-108.308	-108.317	-108.239	-108.273	-108.273	-108.196	-108.196	-108.308	-108.363	-108.287	-108.361	-108.361	-108.285	-108.285	-108.308	-108.447	-108.374	-108.419	-108.419	-108.344	-108.344		1.64	-0.102667	-0.109052	-0.0330869	-0.062715	-0.062715	0.012775	0.012775	-0.0613976	-0.112945	-0.0386243	-0.110548	-0.110548	-0.0371838	-0.0371838	-0.0116797	-0.147187	-0.0751829	-0.118869	-0.118869	-0.0457938	-0.0457938
[truncated: 113 more rows]

## Sheet: Parameter Extraction
																																			Contribution from J						Contribution from t and delta						Total
[truncated: 53 more rows]
[truncated: 34 more columns]

## Sheet: N2_data_params.csv
t, delta, J	CAS	1x	S	CAS	1x	S	CAS	1x	S
[truncated: 51 more rows]

## Sheet: Conversions And Other Data
	Conversion Factors			Single Molecule Data (δ)			Taratiel Parameters
[truncated: 16 more rows]

[truncated: 4 more sheets: CAS Data, 1x Data, S Data, 2SF Data (CSV)]
